# Supplementary material for: The Plasmodium falciparum transcriptome in severe malaria reveals altered expression of genes involved in important processes including surface antigen–encoding var genes
Source: PubMed Central journal article supplement (PMC5864071; doi:10.1371/journal.pbio.2004328), 2018-03-12

s5)

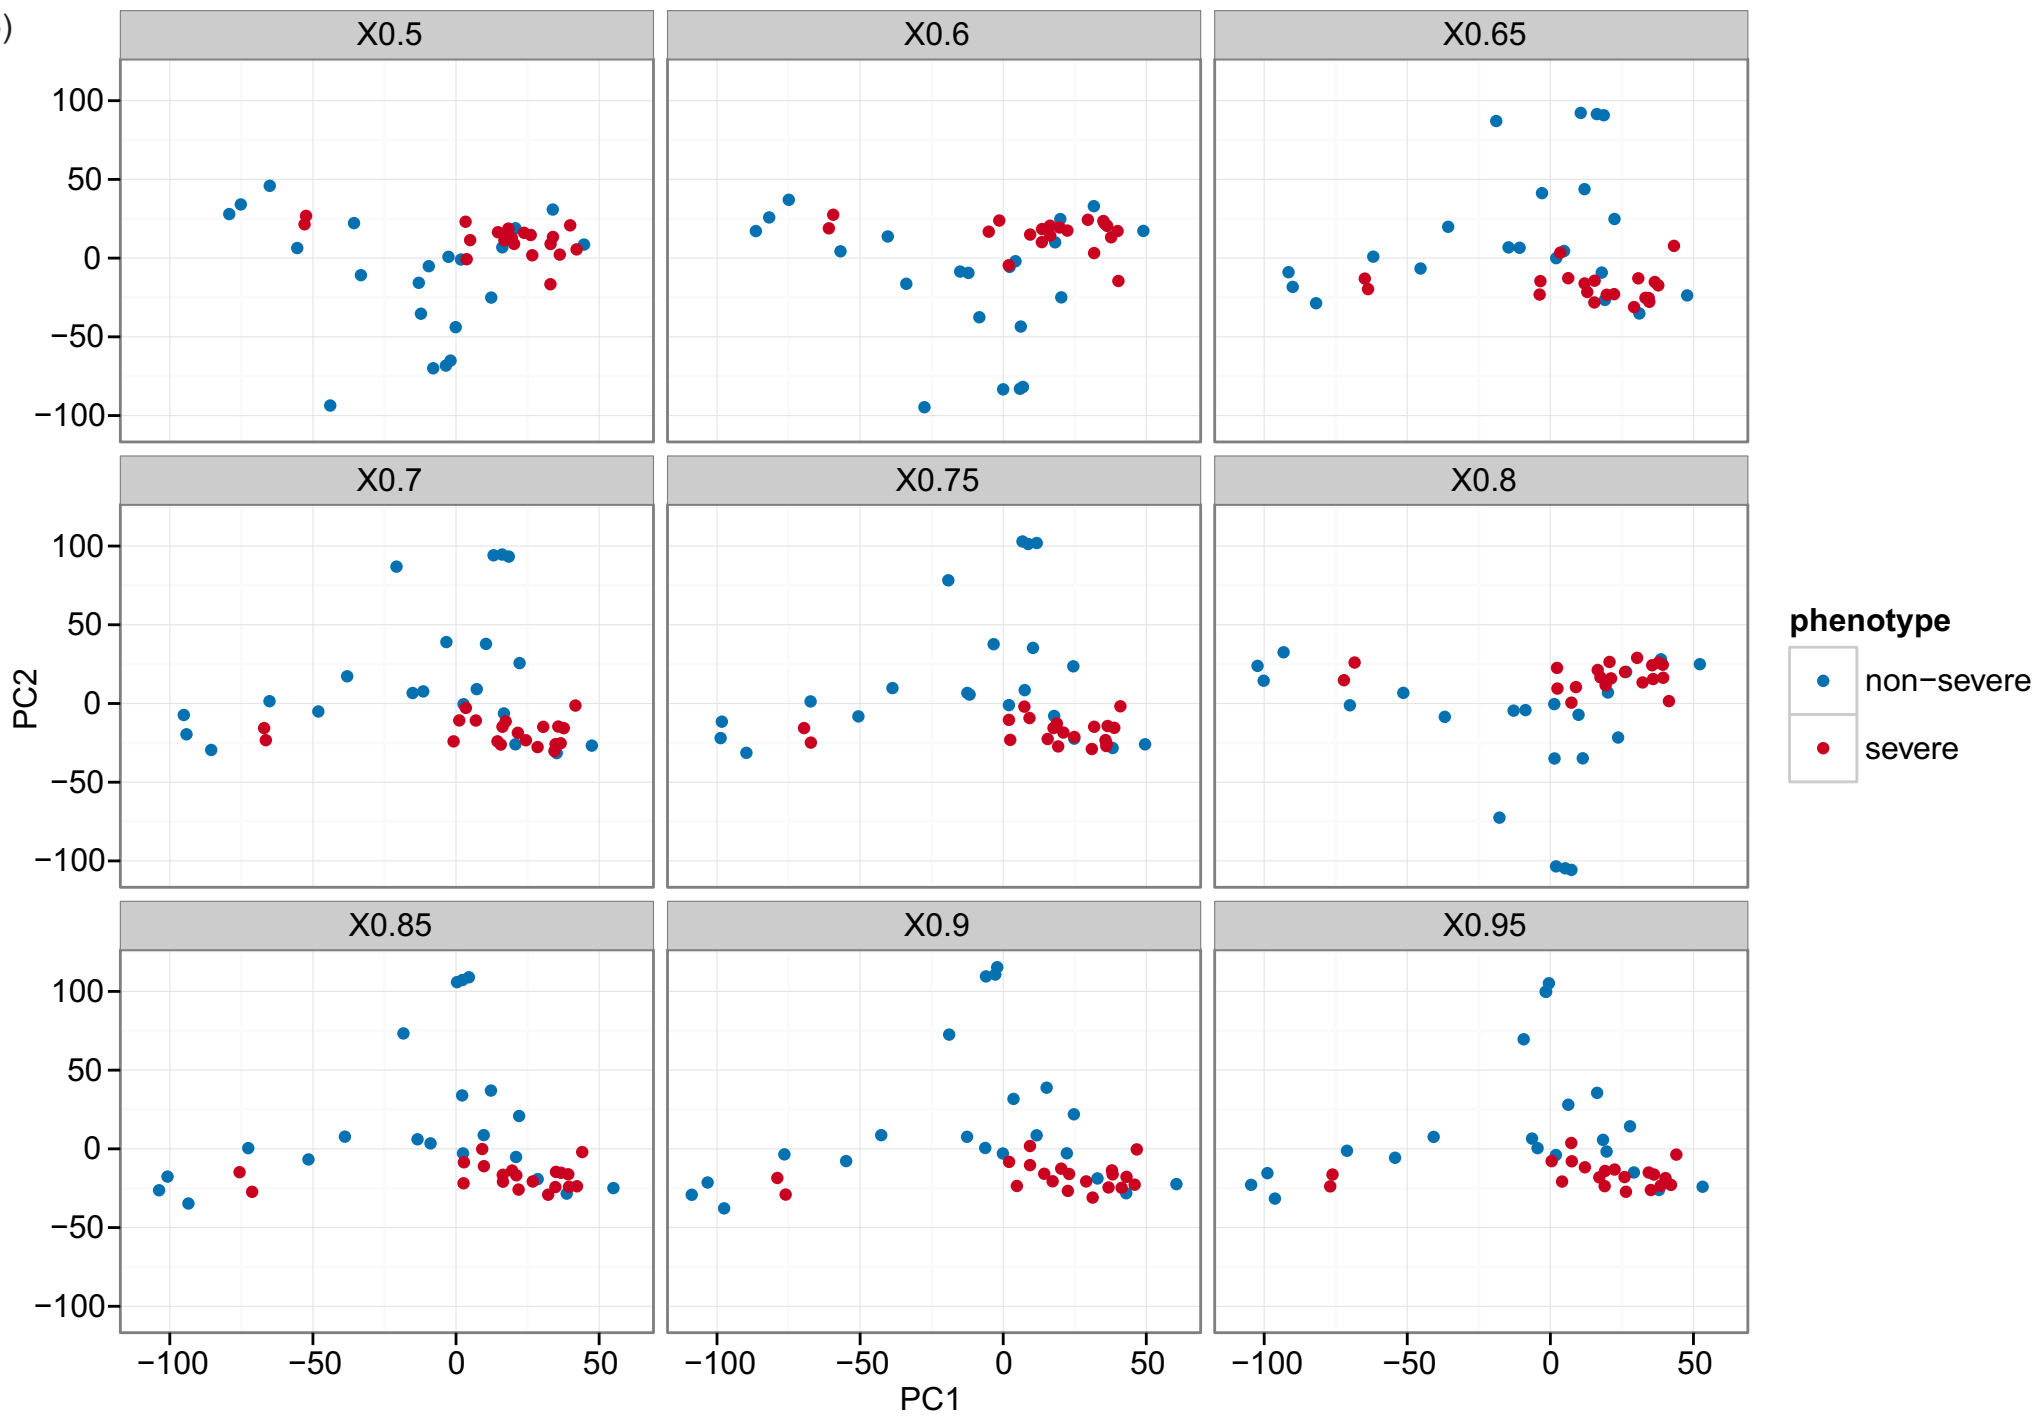

Supplement: pbio.2004328.s005.pdf [file pbio.2004328.s005.pdf]
