# Supplementary material for: The Plasmodium falciparum transcriptome in severe malaria reveals altered expression of genes involved in important processes including surface antigen–encoding var genes
Source: PubMed Central journal article supplement (PMC5864071; doi:10.1371/journal.pbio.2004328), 2018-03-12
Supplement: pbio.2004328.s013.pdf [file pbio.2004328.s013.pdf]

S3 Table: *de novo* assembled *var* transcript statistics by sample.

|                             | Mean Length | Major N50 | Max Length | Number of Transcripts >500nt |
|-----------------------------|-------------|-----------|------------|------------------------------|
| IFC63                       | 2123.415385 | 3747      | 7029       | 65                           |
| IFC66                       | 1671.536036 | 2414      | 9273       | 222                          |
| IFD6                        | 1276.065789 | 1719      | 8539       | 76                           |
| IFD8                        | 1249.730769 | 1620      | 8516       | 78                           |
| IFM-049                     | 1506.085938 | 2008      | 9662       | 128                          |
| IFM047                      | 1565.803681 | 2001      | 9445       | 163                          |
| IFM050                      | 1612.517928 | 2126      | 7498       | 251                          |
| IFM054                      | 1729.94     | 2089      | 5527       | 100                          |
| IFM058                      | 1379.366667 | 1712      | 8277       | 120                          |
| IFM060                      | 1102.615385 | 1180      | 3131       | 13                           |
| IFM061                      | 1896.72381  | 3303      | 10262      | 105                          |
| IFM12                       | 1701.59434  | 2536      | 10527      | 106                          |
| IFM14                       | 1591.5      | 2630      | 5725       | 20                           |
| IFM21                       | 1149.219512 | 1311      | 5399       | 123                          |
| IFM23                       | 2102.081967 | 4645      | 10559      | 61                           |
| IFM24                       | 2133.462687 | 3694      | 10188      | 67                           |
| IFM26                       | 1439.72619  | 1705      | 8491       | 84                           |
| IFM27                       | 1553.52     | 2433      | 6696       | 125                          |
| IFM53                       | 1626.158537 | 2704      | 10385      | 82                           |
| IFM56                       | 1794.9      | 3258      | 6946       | 20                           |
| IFM57                       | 1825.924812 | 2558      | 10083      | 133                          |
| SFC-023                     | 1918.052632 | 4105      | 10021      | 19                           |
| SFC-025                     | 890.6923077 | 848       | 1708       | 13                           |
| SFC-18                      | 1740.881579 | 2711      | 6724       | 76                           |
| SFC-21                      | 1276.698529 | 1654      | 6586       | 136                          |
| SFC13                       | 1500.98125  | 1859      | 9174       | 160                          |
| SFC14                       | 1682.010204 | 2044      | 9506       | 98                           |
| SFC15-CM                    | 1678.641509 | 2630      | 9372       | 106                          |
| SFC16                       | 2183.109375 | 4042      | 10193      | 64                           |
| SFC17                       | 1761.725275 | 2685      | 8099       | 182                          |
| SFC19                       | 2135.554054 | 4306      | 9404       | 74                           |
| SFC22                       | 1621.348624 | 2264      | 10225      | 218                          |
| SFM-10                      | 1669.978261 | 2754      | 7596       | 138                          |
| SFM-1                       | 1717.333333 | 2575      | 7708       | 117                          |
| SFM-3                       | 1845.181034 | 2617      | 10074      | 116                          |
| SFM-5                       | 795.725     | 749       | 1893       | 40                           |
| SFM-6                       | 1313.197917 | 1654      | 4558       | 96                           |
| SFM-7                       | 1800.178571 | 2441      | 8467       | 112                          |
| SFM-8                       | 1787.385475 | 2675      | 8650       | 179                          |
| SFU-3                       | 1384.282258 | 1752      | 6159       | 124                          |
| SFU2                        | 1760.556604 | 2883      | 8594       | 106                          |
| SXC2                        | 1781.240602 | 2566      | 9964       | 133                          |
| Total Individual Assemblies | 1638.35581  | 2336      | 10559      | 4449                         |
| Combined Assembly           | 819.5322581 | 802       | 6502       | 3472                         |
