# Supplementary material for: The Plasmodium falciparum transcriptome in severe malaria reveals altered expression of genes involved in important processes including surface antigen–encoding var genes
Source: PLoS Biol. 2018 Mar 12;16(3):e2004328. doi: 10.1371/journal.pbio.2004328 (PMC5864071; doi:10.1371/journal.pbio.2004328)
Supplement: S3 Data — GO, Gene Oncology; KEGG, Kyoto Encyclopedia of Genes and Genomes. (XLSX) [file pbio.2004328.s017.xlsx]

## Sheet: Sheet2
KEGG_ID	set.size	n.both	n.up	n.down	p.value.both	p.value.up	p.value.down	GO or KEGG pathway	gene id	gene logFC	gene adj p	gene name
ec00300__PK__KEGG	24	4	1	3	0.0606231	0.463081	0.058965	Lysine biosynthesis	PF3D7_0826100	-0.526	0.0905	E3 ubiquitin-protein ligase, putative null
									PF3D7_0915100	-0.531	0.0887	SUMO-conjugating enzyme UBC9
									PF3D7_1235300	-0.568	0.0801	CCR4-NOT transcription complex subunit 4, putative (NOT4) NOT4
									PF3D7_1414100	0.548	0.099	conserved Plasmodium protein, unknown function null
ec00010__PK__KEGG	27	3	0	3	0.240292	1	0.0785971	Glycolysis / Gluconeogenesis	PF3D7_1444800	-0.692	0.0427	fructose-bisphosphate aldolase (FBPA) FBPA
ec00710__PK__KEGG	12	2	0	2	0.172458	1	0.0721483	Carbon fixation in photosynthetic organisms	PF3D7_1462800	-0.693	0.0756	glyceraldehyde-3-phosphate dehydrogenase (GAPDH) GAPDH
									PF3D7_1232200	-0.941	0.0995	dihydrolipoyl dehydrogenase, mitochondrial (LPD1) LPD1
ec00565__PK__KEGG	32	4	4	0	0.139418	0.0084061	1	Ether lipid metabolism	PF3D7_0303400	1	0.0926	palmitoyltransferase (DHHC1) DHHC1
ec00600__PK__KEGG	20	2	2	0	0.362248	0.0911634	1	Sphingolipid metabolism	PF3D7_0805600	0.774	0.0322	PAP2-like protein, putative null
									PF3D7_1118400	1.065	0.0384	haloacid dehalogenase-like hydrolase, putative null
									PF3D7_1321600	1.398	0.048	phosphodiesterase gamma, putative (PDEgamma) PDEgamma
GO:0006457	81	9	1	8	0.0672476	0.878728	0.0104952	protein folding	PF3D7_0201800	-0.527	0.0661	knob associated heat shock protein 40 (KAHsp40) KAHsp40
									PF3D7_0512000	-1.03	0.0427	prefoldin subunit, putative null
									PF3D7_0527500	-0.398	0.0783	Hsc70-interacting protein (HIP) HIP
									PF3D7_0608700	-0.362	0.0986	T-complex protein 1 subunit zeta
									PF3D7_1108700	0.745	0.0447	heat shock protein DnaJ homologue Pfj2 null
									PF3D7_1119200	-1.038	0.0568	conserved protein, unknown function null
									PF3D7_1128100	-0.703	0.0626	cochaperone prefoldin complex subunit, putative null
									PF3D7_1247400	-0.628	0.0905	FK506-binding protein (FKBP)-type peptidyl-prolyl isomerase (FKBP35) FKBP35
									PF3D7_1423200	-0.588	0.0926	peptidyl-prolyl cis-trans isomerase (CYP52) CYP52
ec00790__PK__KEGG	10	2	0	2	0.127547	1	0.0516537	Folate biosynthesis	PF3D7_0810800	-1.107	0.0294	dihydropteroate synthetase (DHPS) DHPS
GO:0009396	5	2	0	2	0.0348823	1	0.0129871	folic acid-containing compound biosynthetic process	PF3D7_1224000	-1.67	0.014	GTP cyclohydrolase I (GCH1) GCH1
GO:0006760	6	2	0	2	0.0501716	1	0.0190025	folic acid-containing compound metabolic process
GO:0042559	7	2	0	2	0.0673676	1	0.0259525	pteridine-containing compound biosynthetic process
GO:0042558	8	2	0	2	0.0861707	1	0.0337592	pteridine-containing compound metabolic process
GO:1901607	14	2	0	2	0.21943	1	0.0947673	alpha-amino acid biosynthetic process
GO:0006575	14	2	0	2	0.21943	1	0.0947673	cellular modified amino acid metabolic process
GO:0042398	12	2	0	2	0.172458	1	0.0721483	cellular modified amino acid biosynthetic process
GO:0032259	29	6	1	5	0.00827646	0.528487	0.00402469	methylation	PF3D7_1303100	-0.764	0.0895	methyltransferase-like protein, putative null
GO:0034968	5	2	0	2	0.0348823	1	0.0129871	histone lysine methylation	PF3D7_1354300	-0.517	0.0466	large subunit rRNA methyltransferase, putative null
GO:0016571	6	2	0	2	0.0501716	1	0.0190025	histone methylation	PF3D7_1105100	-1.063	0.0123	histone H2B (H2B) H2B
GO:0016568	20	3	0	3	0.12797	1	0.0370206	chromatin modification	PF3D7_0216000	-2.074	0.0529	DEAD/DEAH box helicase, putative
GO:0043414	21	4	1	3	0.039557	0.419592	0.0420305	macromolecule methylation	PF3D7_1115200	-0.659	0.0539	SET domain protein, putative (SET7) SET7
GO:0051276	46	4	0	4	0.329237	1	0.0924045	chromosome organization	PF3D7_1322100	-0.528	0.0929	variant-silencing SET protein (SETvs) SETvs
GO:0016570	12	2	0	2	0.172458	1	0.0721483	histone modification	PF3D7_0522300	-0.572	0.0509	S-adenosylmethionine-dependent methyltransferase, putative null
GO:0008213	10	2	0	2	0.127547	1	0.0516537	protein alkylation	PF3D7_1309600	0.727	0.08	ribosomal RNA methyltransferase, putative null
GO:0006479	10	2	0	2	0.127547	1	0.0516537	protein methylation
GO:0016569	12	2	0	2	0.172458	1	0.0721483	covalent chromatin modification
GO:0006520	87	8	1	7	0.180771	0.896401	0.0438753	cellular amino acid metabolic process	PF3D7_0802000	-1.266	0.0123	glutamate dehydrogenase, putative (GDH3) GDH3
ec00250__PK__KEGG	13	2	0	2	0.195766	1	0.0832198	Alanine, aspartate and glutamate metabolism	PF3D7_1344800	-0.768	0.0123	aspartate carbamoyltransferase (ATCase) ATCase
									PF3D7_0416100	-0.909	0.0578	glutamyl-tRNA(Gln) amidotransferase subunit A, putative null
									PF3D7_0810800	-1.107	0.0294	dihydropteroate synthetase (DHPS) DHPS
									PF3D7_1224000	-1.67	0.014	GTP cyclohydrolase I (GCH1) GCH1
									PF3D7_0211800	-0.643	0.0801	asparagine–tRNA ligase (AsnRS) AsnRS
									PF3D7_1350100	-0.43	0.0801	lysine–tRNA ligase (KRS1) KRS1
									PF3D7_0925300	2.109	0.0209	proline–tRNA ligase, putative null
GO:0006414	22	4	1	3	0.0460277	0.434464	0.0473622	translational elongation	PF3D7_0319600	-0.442	0.0672	elongation factor 1 (EF-1), putative null
									PF3D7_0913200	-0.503	0.0895	elongation factor 1-beta (EF-1beta) EF-1beta
									PF3D7_1451100	-0.648	0.0707	elongation factor 2 null
									PF3D7_0305000	0.947	0.0516	elongation factor Ts (EF-Ts) EF-Ts
GO:0007018	23	4	1	3	0.0530514	0.448957	0.0530095	microtubule-based movement	PF3D7_0905300	-0.896	0.0926	dynein heavy chain, putative
									PF3D7_1025500	-1.108	0.0781	conserved Plasmodium protein, unknown function
									PF3D7_1122900	-1.086	0.0758	dynein heavy chain, putative null
									PF3D7_0317500	0.587	0.0661	kinesin-5 (EG5) EG5
GO:0042493	59	5	0	5	0.314152	1	0.0690904	response to drug	PF3D7_0316600	-1.407	0.00842	formate-nitrite transporter, putative null
GO:0042221	81	6	0	6	0.403108	1	0.082394	response to chemical	PF3D7_0509800	-0.385	0.068	phosphatidylinositol 4-kinase (PI4K) PI4K
									PF3D7_0704600	-0.663	0.0378	E3 ubiquitin-protein ligase (UT) UT
									PF3D7_0708500	-0.737	0.0535	heat shock protein 86 family protein null
									PF3D7_0810800	-1.107	0.0294	dihydropteroate synthetase (DHPS) DHPS
									PF3D7_1451100	-0.648	0.0707	elongation factor 2 null
GO:0043648	12	2	0	2	0.172458	1	0.0721483	dicarboxylic acid metabolic process	PF3D7_0802000	-1.266	0.0123	glutamate dehydrogenase, putative (GDH3) GDH3
									PF3D7_0810800	-1.107	0.0294	dihydropteroate synthetase (DHPS) DHPS
GO:0051246	34	4	0	4	0.163481	1	0.0369766	regulation of protein metabolic process	PF3D7_0723900	-0.612	0.0632	conserved Plasmodium protein, unknown function null
GO:0006417	24	3	0	3	0.189863	1	0.058965	regulation of translation	PF3D7_0823200	-0.619	0.0512	RNA-binding protein, putative null
GO:0010608	27	3	0	3	0.240292	1	0.0785971	posttranscriptional regulation of gene expression	PF3D7_1347500	-0.472	0.0768	DNA/RNA-binding protein Alba 4 (ALBA4) ALBA4
									PF3D7_1466300	-0.392	0.0805	26S proteasome regulatory subunit RPN2, putative
GO:0006396	223	21	8	13	0.0407159	0.20918	0.0747925	RNA processing	PF3D7_0109700	-1.423	0.0173	conserved protein, unknown function null
GO:0008380	85	7	1	6	0.287517	0.890814	0.0984788	RNA splicing	PF3D7_0218700	-0.606	0.0905	pre-mRNA-processing protein 45, putative (PRP45) PRP45
									PF3D7_0405400	-0.562	0.0587	pre-mRNA-processing-splicing factor 8, putative (PRPF8) PRPF8
									PF3D7_0522300	-0.572	0.0509	S-adenosylmethionine-dependent methyltransferase, putative null
									PF3D7_0621500	1.065	0.0633	conserved Plasmodium protein, unknown function null
									PF3D7_0625600	0.84	0.0895	poly(A) polymerase PAP, putative null
									PF3D7_0629600	0.546	0.0427	conserved Plasmodium protein, unknown function null
									PF3D7_0709600	-0.489	0.0759	ribonucleases P/MRP protein subunit POP1, putative (POP1) POP1
									PF3D7_0716000	-0.49	0.0771	RNA-binding protein, putative null
									PF3D7_0717400	-0.411	0.0967	queuine tRNA-ribosyltransferase, putative null
									PF3D7_0723900	-0.612	0.0632	conserved Plasmodium protein, unknown function null
									PF3D7_0817100	1.043	0.0707	tRNA modification GTPase, putative
									PF3D7_1030100	-0.406	0.0781	pre-mRNA-splicing factor ATP-dependent RNA helicase PRP22, putative (PRP22) PRP22
									PF3D7_1111000	0.564	0.0926	tRNA m5C-methyltransferase, putative null
									PF3D7_1231600	-0.706	0.0722	pre-mRNA-splicing factor ATP-dependent RNA helicase PRP2, putative (PRP2) PRP2
									PF3D7_1246600	-0.852	0.0332	pre-mRNA-splicing factor, putative null
									PF3D7_1309600	0.727	0.08	ribosomal RNA methyltransferase, putative null
									PF3D7_1321700	-0.538	0.0606	splicing factor 1 (SF1) SF1
									PF3D7_1354300	-0.517	0.0466	large subunit rRNA methyltransferase, putative null
									PF3D7_1404900	0.405	0.0768	conserved Plasmodium protein, unknown function null
									PF3D7_1428100	0.966	0.048	WW domain-binding protein 11, putative null
GO:0009132	6	2	2	0	0.0501716	0.00907562	1	nucleoside diphosphate metabolic process	PF3D7_1015800	1.197	0.068	ribonucleotide reductase small subunit, putative null
GO:0009186	4	1	1	0	0.229318	0.0982936	1	deoxyribonucleoside diphosphate metabolic process
GO:0046131	3	1	1	0	0.177446	0.0746589	1	pyrimidine ribonucleoside metabolic process	PF3D7_1366500	1.09	0.0801	nucleoside diphosphate kinase (NDK) NDK
GO:0009218	3	1	1	0	0.177446	0.0746589	1	pyrimidine ribonucleotide metabolic process
GO:0009220	3	1	1	0	0.177446	0.0746589	1	pyrimidine ribonucleotide biosynthetic process
GO:0006165	3	1	1	0	0.177446	0.0746589	1	nucleoside diphosphate phosphorylation
GO:0046132	3	1	1	0	0.177446	0.0746589	1	pyrimidine ribonucleoside biosynthetic process
GO:0009148	3	1	1	0	0.177446	0.0746589	1	pyrimidine nucleoside triphosphate biosynthetic process
GO:0046134	3	1	1	0	0.177446	0.0746589	1	pyrimidine nucleoside biosynthetic process
GO:0006213	3	1	1	0	0.177446	0.0746589	1	pyrimidine nucleoside metabolic process
GO:0046939	3	1	1	0	0.177446	0.0746589	1	nucleotide phosphorylation
GO:1901070	3	1	1	0	0.177446	0.0746589	1	guanosine-containing compound biosynthetic process
GO:0009147	4	1	1	0	0.229318	0.0982936	1	pyrimidine nucleoside triphosphate metabolic process
GO:0043087	19	4	3	1	0.0282762	0.0116987	0.516826	regulation of GTPase activity	PF3D7_0506700	-0.562	0.0949	GTPase-activating protein, putative null
GO:0033124	19	4	3	1	0.0282762	0.0116987	0.516826	regulation of GTP catabolic process	PF3D7_0724000	0.875	0.0783	Rab GTPase activator and protein kinase, putative null
GO:0033121	20	4	3	1	0.0336406	0.0135099	0.535006	regulation of purine nucleotide catabolic process	PF3D7_0804900	0.919	0.0496	GTPase-activating protein, putative null
GO:0030811	20	4	3	1	0.0336406	0.0135099	0.535006	regulation of nucleotide catabolic process	PF3D7_1016200	1.055	0.0648	conserved Plasmodium protein, unknown function null
GO:1900542	20	4	3	1	0.0336406	0.0135099	0.535006	regulation of purine nucleotide metabolic process	PF3D7_1247400	-0.628	0.0905	FK506-binding protein (FKBP)-type peptidyl-prolyl isomerase (FKBP35) FKBP35
GO:0009118	20	4	3	1	0.0336406	0.0135099	0.535006	regulation of nucleoside metabolic process
GO:0006140	20	4	3	1	0.0336406	0.0135099	0.535006	regulation of nucleotide metabolic process
GO:0031329	20	4	3	1	0.0336406	0.0135099	0.535006	regulation of cellular catabolic process
GO:0051336	22	5	3	2	0.0104389	0.0175858	0.198795	regulation of hydrolase activity
GO:0009894	23	5	3	2	0.0126656	0.0198529	0.212679	regulation of catabolic process	PF3D7_1466300	-0.392	0.0805	26S proteasome regulatory subunit RPN2, putative
GO:0019220	28	5	3	2	0.0285969	0.0334905	0.28295	regulation of phosphate metabolic process
GO:0050790	28	5	3	2	0.0285969	0.0334905	0.28295	regulation of catalytic activity
GO:0065009	28	5	3	2	0.0285969	0.0334905	0.28295	regulation of molecular function
GO:0051174	28	5	3	2	0.0285969	0.0334905	0.28295	regulation of phosphorus metabolic process
GO:0032012	4	1	1	0	0.229318	0.0982936	1	regulation of ARF protein signal transduction
GO:0032312	3	1	1	0	0.177446	0.0746589	1	regulation of ARF GTPase activity
GO:0032318	16	3	2	1	0.0754459	0.0614772	0.457932	regulation of Ras GTPase activity
GO:0046578	18	4	2	2	0.0234574	0.0758508	0.144746	regulation of Ras protein signal transduction
GO:0051056	18	4	2	2	0.0234574	0.0758508	0.144746	regulation of small GTPase mediated signal transduction	PF3D7_1149500	-0.653	0.0648	ring-infected erythrocyte surface antigen 2, pseudogene (RESA2) RESA2
GO:1902531	18	4	2	2	0.0234574	0.0758508	0.144746	regulation of intracellular signal transduction
GO:0006289	11	3	2	1	0.0280351	0.0306076	0.343486	nucleotide-excision repair	PF3D7_1244200	1.031	0.0397	transcription factor Tfb2, putative null
									PF3D7_1250800	-0.475	0.0783	DNA repair protein rhp16, putative
									PF3D7_1353500	0.778	0.0862	RNA polymerase II transcription factor B subunit 4, putative (TFB4) TFB4
GO:0051806	56	6	4	2	0.138778	0.0538422	0.627167	entry into cell of other organism involved in symbiotic interaction	PF3D7_0423800	2.29	0.0427	cysteine-rich protective antigen (CyRPA) CyRPA
GO:0030260	56	6	4	2	0.138778	0.0538422	0.627167	entry into host cell	PF3D7_0612700	0.819	0.0908	6-cysteine protein
GO:0051828	62	6	4	2	0.194078	0.0728914	0.682248	entry into other organism involved in symbiotic interaction	PF3D7_1027300	-0.763	0.0905	peroxiredoxin (nPrx) nPrx
GO:0044409	62	6	4	2	0.194078	0.0728914	0.682248	entry into host	PF3D7_1321600	1.398	0.048	phosphodiesterase gamma, putative (PDEgamma) PDEgamma
GO:0006099	19	2	2	0	0.33882	0.0833981	1	tricarboxylic acid cycle	PF3D7_1212800	1.021	0.0364	iron-sulfur subunit of succinate dehydrogenase null
GO:0009060	20	2	2	0	0.362248	0.0911634	1	aerobic respiration	PF3D7_1431600	1.118	0.0974	succinyl-CoA ligase [ADP-forming] subunit beta, putative
ec00720__PK__KEGG	21	2	2	0	0.385357	0.099131	1	Carbon fixation pathways in prokaryotes
ec00660__PK__KEGG	3	1	1	0	0.177446	0.0746589	1	C5-Branched dibasic acid metabolism
GO:0009438	3	1	1	0	0.177446	0.0746589	1	methylglyoxal metabolic process	PF3D7_1205700	1.229	0.0626	targeted glyoxalase II (tGloII) tGloII
GO:0006275	3	1	1	0	0.177446	0.0746589	1	regulation of DNA replication	PF3D7_1226600	1.498	0.0587	proliferating cell nuclear antigen 2 (PCNA2) PCNA2
GO:0051052	4	1	1	0	0.229318	0.0982936	1	regulation of DNA metabolic process
GO:0022406	4	1	1	0	0.229318	0.0982936	1	membrane docking	PF3D7_0216400	0.789	0.0737	vacuolar protein sorting-associated protein 45, putative (VPS45) VPS45
GO:0048278	4	1	1	0	0.229318	0.0982936	1	vesicle docking
GO:0006904	4	1	1	0	0.229318	0.0982936	1	vesicle docking involved in exocytosis
GO:0002098	4	1	1	0	0.229318	0.0982936	1	tRNA wobble uridine modification	PF3D7_0817100	1.043	0.0707	tRNA modification GTPase, putative
GO:0002097	4	1	1	0	0.229318	0.0982936	1	tRNA wobble base modification
GO:0006875	4	1	1	0	0.229318	0.0982936	1	cellular metal ion homeostasis	PF3D7_1362300	0.782	0.0725	conserved protein, unknown function null
GO:0055065	4	1	1	0	0.229318	0.0982936	1	metal ion homeostasis
Genes and genesets that were upregulated in severe malaria are in red text whilst those that were downregulated are in blue text
Overlapping and redundant genesets are listed directly underneath each other and spearated from unrelated genesets by empty rows. The genes in the union of the overlapping genesets are in the four right hand columns
