# Supplementary material for: The Plasmodium falciparum transcriptome in severe malaria reveals altered expression of genes involved in important processes including surface antigen–encoding var genes
Source: PLoS Biol. 2018 Mar 12;16(3):e2004328. doi: 10.1371/journal.pbio.2004328 (PMC5864071; doi:10.1371/journal.pbio.2004328)
Supplement: S7 Data — The results of the differential expression analyses are also summarised. (XLSX) [file pbio.2004328.s021.xlsx]

## Sheet: S7_separate_assy_Clusters
transcripts	cluster	baseMean	log2FoldChange	lfcSE	stat	pvalue	padj	transcripts
IFM53_S14_L001_Contig2724,SFM-10_S1_L001_Contig2583,IFM53_S14_L001_Contig2599,IFC63_S16_L001_Contig1916,IFM061_S15_Contig1009,SFU2_S5_L001_Contig1883,IFM21_S3_Contig604,IFM24_S5_Contig684,IFM24_S5_Contig987,SFU2_S5_L001_Contig1892,IFM21_S3_Contig807,SFM-10_S1_L001_Contig2529	Cluster-10.285	77.886	-6.048	1.16	-5.214	1.85e-07	0.000127	IFM53_S14_L001_Contig2724,SFM-10_S1_L001_Contig2583,IFM53_S14_L001_Contig2599,IFC63_S16_L001_Contig1916,IFM061_S15_Contig1009,SFU2_S5_L001_Contig1883,IFM21_S3_Contig604,IFM24_S5_Contig684,IFM24_S5_Contig987,SFU2_S5_L001_Contig1892,IFM21_S3_Contig807,SFM-10_S1_L001_Contig2529
IFM23_S4_Contig695,IFM26_S8_Contig201,IFM12_S16_Contig851,IFM12_S16_Contig844,IFM23_S4_14942_soapGraphK21	Cluster-10.415	7.225	-6.511	1.323	-4.921	8.6e-07	0.000155	IFM23_S4_Contig695,IFM26_S8_Contig201,IFM12_S16_Contig851,IFM12_S16_Contig844,IFM23_S4_14942_soapGraphK21
IFM054_S12_Contig1103,IFD8_S2_Contig1034,IFM047_S10_Contig1624,IFM047_S10_Contig1674,IFM054_S12_Contig1088,IFM047_S10_Contig1660	Cluster-10.479	42.632	-6.451	1.321	-4.882	1.05e-06	0.000155	IFM054_S12_Contig1103,IFD8_S2_Contig1034,IFM047_S10_Contig1624,IFM047_S10_Contig1674,IFM054_S12_Contig1088,IFM047_S10_Contig1660
IFM14_S7_Contig29	Cluster-10.660	48.103	-2.999	0.616	-4.868	1.13e-06	0.000155	IFM14_S7_Contig29
IFM12_S16_Contig819,SFC17_S7_L001_Contig1742,IFD6_S1_Contig745,IFM12_S16_Contig842,SFC17_S7_L001_Contig1736,IFM23_S4_Contig694,SFC17_S7_L001_Contig1973,SFC17_S7_L001_5639_soapGraphK61,SFC17_S7_L001_Contig1729,IFM23_S4_Contig693,IFM23_S4_Contig490,IFM12_S16_Contig416,SFC17_S7_L001_Contig1002	Cluster-10.1003	37.482	-6.651	1.321	-5.037	4.74e-07	0.000155	IFM12_S16_Contig819,SFC17_S7_L001_Contig1742,IFD6_S1_Contig745,IFM12_S16_Contig842,SFC17_S7_L001_Contig1736,IFM23_S4_Contig694,SFC17_S7_L001_Contig1973,SFC17_S7_L001_5639_soapGraphK61,SFC17_S7_L001_Contig1729,IFM23_S4_Contig693,IFM23_S4_Contig490,IFM12_S16_Contig416,SFC17_S7_L001_Contig1002
IFM050_S11_Contig1735	Cluster-10.70	2.239	-6.588	1.378	-4.781	1.75e-06	0.0002	IFM050_S11_Contig1735
IFM21_S3_Contig787,SFM-10_S1_L001_Contig1145,IFM21_S3_Contig141,IFM27_S9_Contig499	Cluster-10.279	19.244	-7.083	1.499	-4.724	2.31e-06	0.000202	IFM21_S3_Contig787,SFM-10_S1_L001_Contig1145,IFM21_S3_Contig141,IFM27_S9_Contig499
SFM-10_S1_L001_Contig1339,SFU2_S5_L001_Contig1451,IFM24_S5_Contig977,IFD6_S1_Contig955	Cluster-10.1150	49.239	-6.743	1.428	-4.721	2.35e-06	0.000202	SFM-10_S1_L001_Contig1339,SFU2_S5_L001_Contig1451,IFM24_S5_Contig977,IFD6_S1_Contig955
IFM27_S9_1568_soapGraphK61,IFM054_S12_Contig138,SFC22_S9_L001_Contig2844,IFM27_S9_Contig324,IFD8_S2_Contig882,SFC22_S9_L001_Contig3148,IFM054_S12_Contig907,IFM047_S10_Contig1675,IFD8_S2_Contig1050,IFM27_S9_Contig620,IFD8_S2_32839_soapGraphK31,IFM27_S9_Contig420,IFM054_S12_Contig880,IFD8_S2_Contig836,IFM047_S10_4640_soapGraphK61,IFM047_S10_Contig1234,SFC22_S9_L001_Contig3169,SFC22_S9_L001_Contig21…	Cluster-10.1056	228.349	-7.458	1.591	-4.687	2.77e-06	0.000211	IFM27_S9_1568_soapGraphK61,IFM054_S12_Contig138,SFC22_S9_L001_Contig2844,IFM27_S9_Contig324,IFD8_S2_Contig882,SFC22_S9_L001_Contig3148,IFM054_S12_Contig907,IFM047_S10_Contig1675,IFD8_S2_Contig1050,IFM27_S9_Contig620,IFD8_S2_32839_soapGraphK31,IFM27_S9_Contig420,IFM054_S12_Contig880,IFD8_S2_Contig836,IFM047_S10_4640_soapGraphK61,IFM047_S10_Contig1234,SFC22_S9_L001_Contig3169,SFC22_S9_L001_Contig21…
IFM050_S11_Contig3199	Cluster-10.71	1.831	-6.297	1.385	-4.547	5.44e-06	0.000373	IFM050_S11_Contig3199
IFM27_S9_Contig576	Cluster-10.1012	28.584	-5.942	1.379	-4.31	1.64e-05	0.000973	IFM27_S9_Contig576
IFC63_S16_L001_4602_soapGraphK61,IFM56_S15_Contig1235	Cluster-10.1065	20.718	-3.499	0.814	-4.301	1.7e-05	0.000973	IFC63_S16_L001_4602_soapGraphK61,IFM56_S15_Contig1235
SFU-3_S21_L002_Contig1449,IFM14_S7_Contig379	Cluster-10.1103	12.027	-5.663	1.328	-4.263	2.02e-05	0.00107	SFU-3_S21_L002_Contig1449,IFM14_S7_Contig379
SFU2_S5_L001_Contig298	Cluster-10.1155	9.941	-5.652	1.336	-4.23	2.34e-05	0.00115	SFU2_S5_L001_Contig298
IFM050_S11_8280_soapGraphK61,IFM050_S11_Contig3343,IFM050_S11_Contig1942	Cluster-10.176	1.528	-6.04	1.504	-4.017	5.89e-05	0.00253	IFM050_S11_8280_soapGraphK61,IFM050_S11_Contig3343,IFM050_S11_Contig1942
IFM56_S15_18533_soapGraphK31,IFM23_S4_Contig101,IFM56_S15_Contig1236	Cluster-10.1027	28.477	-8.141	2.019	-4.032	5.54e-05	0.00253	IFM56_S15_18533_soapGraphK31,IFM23_S4_Contig101,IFM56_S15_Contig1236
IFM-049_S6_Contig15449,IFM53_S14_L001_Contig2132,IFM53_S14_L001_6722_soapGraphK61,IFM061_S15_2216_soapGraphK61,IFC63_S16_L001_Contig1659,IFM061_S15_Contig380,IFM061_S15_Contig911,IFM53_S14_L001_Contig2467,SFU2_S5_L001_Contig1725,IFM24_S5_Contig829,IFM061_S15_Contig756,IFM53_S14_L001_34995_soapGraphK21	Cluster-10.597	24.116	-4.97	1.258	-3.951	7.79e-05	0.00311	IFM-049_S6_Contig15449,IFM53_S14_L001_Contig2132,IFM53_S14_L001_6722_soapGraphK61,IFM061_S15_2216_soapGraphK61,IFC63_S16_L001_Contig1659,IFM061_S15_Contig380,IFM061_S15_Contig911,IFM53_S14_L001_Contig2467,SFU2_S5_L001_Contig1725,IFM24_S5_Contig829,IFM061_S15_Contig756,IFM53_S14_L001_34995_soapGraphK21
SFM-7_S13_L001_Contig1086	Cluster-10.681	2.846	-4.635	1.18	-3.927	8.6e-05	0.00311	SFM-7_S13_L001_Contig1086
IFM-049_S6_Contig34425	Cluster-10.1025	10.707	-5.011	1.273	-3.938	8.22e-05	0.00311	IFM-049_S6_Contig34425
IFM047_S10_Contig1549	Cluster-10.1017	91.653	-3.254	0.845	-3.849	0.000119	0.00407	IFM047_S10_Contig1549
IFM050_S11_Contig3790	Cluster-10.47	1.303	-5.674	1.48	-3.834	0.000126	0.00411	IFM050_S11_Contig3790
IFD8_S2_Contig1097,IFM047_S10_Contig1652	Cluster-10.1134	14.182	-7.417	1.942	-3.819	0.000134	0.00418	IFD8_S2_Contig1097,IFM047_S10_Contig1652
SFU2_S5_L001_Contig997,SFC14_S17_L001_Contig2138,SFC15-CM_S29_L002_Contig1476,SFM-10_S1_L001_Contig2469,IFM27_S9_Contig330,IFM-049_S6_Contig33205	Cluster-10.1170	71.615	-3.312	0.874	-3.788	0.000152	0.00453	SFU2_S5_L001_Contig997,SFC14_S17_L001_Contig2138,SFC15-CM_S29_L002_Contig1476,SFM-10_S1_L001_Contig2469,IFM27_S9_Contig330,IFM-049_S6_Contig33205
IFM054_S12_Contig520,IFD8_S2_Contig1121	Cluster-10.357	27.242	-5.21	1.385	-3.761	0.000169	0.00464	IFM054_S12_Contig520,IFD8_S2_Contig1121
IFM054_S12_Contig990,IFM047_S10_Contig1232,IFM047_S10_4738_soapGraphK61,IFM054_S12_Contig995,SFC17_S7_L001_Contig1172,IFD8_S2_Contig1086,IFM054_S12_2245_soapGraphK61,IFC66_S31_L002_Contig1839	Cluster-10.459	12.921	-4.896	1.302	-3.761	0.000169	0.00464	IFM054_S12_Contig990,IFM047_S10_Contig1232,IFM047_S10_4738_soapGraphK61,IFM054_S12_Contig995,SFC17_S7_L001_Contig1172,IFD8_S2_Contig1086,IFM054_S12_2245_soapGraphK61,IFC66_S31_L002_Contig1839
SFM-5_S2_L001_Contig1903,SFM-5_S2_L001_Contig2428,SFU2_S5_L001_Contig1893,IFM058_S13_Contig680,IFM24_S5_Contig974,IFM53_S14_L001_Contig2706,IFM21_S3_Contig1054,IFC63_S16_L001_Contig2094,IFM061_S15_Contig422,IFM24_S5_Contig984,IFM-049_S6_Contig40876	Cluster-10.690	145.018	-5.154	1.394	-3.697	0.000218	0.00576	SFM-5_S2_L001_Contig1903,SFM-5_S2_L001_Contig2428,SFU2_S5_L001_Contig1893,IFM058_S13_Contig680,IFM24_S5_Contig974,IFM53_S14_L001_Contig2706,IFM21_S3_Contig1054,IFC63_S16_L001_Contig2094,IFM061_S15_Contig422,IFM24_S5_Contig984,IFM-049_S6_Contig40876
SFM-5_S2_L001_Contig2570,SFM-5_S2_L001_Contig1581,SFM-5_S2_L001_Contig2427,SFC22_S9_L001_8448_soapGraphK61,SFC22_S9_L001_Contig2796,SFM-5_S2_L001_Contig1951,IFM047_S10_Contig1664,IFM050_S11_Contig3420,SFC22_S9_L001_Contig2846,IFM054_S12_Contig1007,IFD8_S2_Contig1037,IFM047_S10_Contig1637,IFM054_S12_2479_soapGraphK61,IFM047_S10_Contig1403,IFM050_S11_8380_soapGraphK61,IFD8_S2_Contig1043,IFM050_S11_…	Cluster-10.155	21.303	-4.997	1.358	-3.68	0.000233	0.00593	SFM-5_S2_L001_Contig2570,SFM-5_S2_L001_Contig1581,SFM-5_S2_L001_Contig2427,SFC22_S9_L001_8448_soapGraphK61,SFC22_S9_L001_Contig2796,SFM-5_S2_L001_Contig1951,IFM047_S10_Contig1664,IFM050_S11_Contig3420,SFC22_S9_L001_Contig2846,IFM054_S12_Contig1007,IFD8_S2_Contig1037,IFM047_S10_Contig1637,IFM054_S12_2479_soapGraphK61,IFM047_S10_Contig1403,IFM050_S11_8380_soapGraphK61,IFD8_S2_Contig1043,IFM050_S11_…
IFM047_S10_Contig1244,IFM047_S10_Contig1022,IFM054_S12_Contig904,IFM054_S12_Contig939,IFM53_S14_L001_Contig2477,IFM047_S10_Contig1633,IFM054_S12_Contig893,IFD8_S2_Contig1035,IFD8_S2_Contig179,IFM047_S10_Contig1672,IFD8_S2_Contig616,IFD8_S2_Contig878,IFD8_S2_Contig654,IFM054_S12_Contig1100,IFD8_S2_Contig647,IFD8_S2_Contig362	Cluster-10.468	9.937	-4.299	1.185	-3.626	0.000288	0.0061	IFM047_S10_Contig1244,IFM047_S10_Contig1022,IFM054_S12_Contig904,IFM054_S12_Contig939,IFM53_S14_L001_Contig2477,IFM047_S10_Contig1633,IFM054_S12_Contig893,IFD8_S2_Contig1035,IFD8_S2_Contig179,IFM047_S10_Contig1672,IFD8_S2_Contig616,IFD8_S2_Contig878,IFD8_S2_Contig654,IFM054_S12_Contig1100,IFD8_S2_Contig647,IFD8_S2_Contig362
IFM054_S12_Contig1008,IFM054_S12_2489_soapGraphK61,IFM047_S10_Contig1249,IFM047_S10_Contig1429,IFM27_S9_Contig523	Cluster-10.591	9.694	-7.616	2.087	-3.649	0.000263	0.0061	IFM054_S12_Contig1008,IFM054_S12_2489_soapGraphK61,IFM047_S10_Contig1249,IFM047_S10_Contig1429,IFM27_S9_Contig523
SFC15-CM_S29_L002_Contig1970,IFM21_S3_Contig1058	Cluster-10.737	5.894	-7.219	1.994	-3.621	0.000293	0.0061	SFC15-CM_S29_L002_Contig1970,IFM21_S3_Contig1058
IFM53_S14_L001_Contig2127,SFC17_S7_L001_5605_soapGraphK61,IFM054_S12_Contig909,IFD8_S2_Contig1038,IFM047_S10_Contig1653,IFM047_S10_Contig1662,IFM53_S14_L001_Contig2714,IFM054_S12_Contig896,IFM53_S14_L001_Contig2126,SFC17_S7_L001_5497_soapGraphK61,IFD8_S2_Contig846,SFC17_S7_L001_Contig1753,IFC66_S31_L002_Contig1010,IFM047_S10_Contig1447,IFM53_S14_L001_Contig2122,IFM054_S12_Contig1074,IFM047_S10_Co…	Cluster-10.896	58.082	-3.705	1.019	-3.636	0.000277	0.0061	IFM53_S14_L001_Contig2127,SFC17_S7_L001_5605_soapGraphK61,IFM054_S12_Contig909,IFD8_S2_Contig1038,IFM047_S10_Contig1653,IFM047_S10_Contig1662,IFM53_S14_L001_Contig2714,IFM054_S12_Contig896,IFM53_S14_L001_Contig2126,SFC17_S7_L001_5497_soapGraphK61,IFD8_S2_Contig846,SFC17_S7_L001_Contig1753,IFC66_S31_L002_Contig1010,IFM047_S10_Contig1447,IFM53_S14_L001_Contig2122,IFM054_S12_Contig1074,IFM047_S10_Co…
IFM054_S12_Contig1098,IFM047_S10_Contig984,IFD8_S2_Contig1129,IFM047_S10_42250_soapGraphK21	Cluster-10.910	11.409	-6.795	1.86	-3.653	0.000259	0.0061	IFM054_S12_Contig1098,IFM047_S10_Contig984,IFD8_S2_Contig1129,IFM047_S10_42250_soapGraphK21
SFC-18_S20_L002_4632_soapGraphK61,SFC-18_S20_L002_Contig1149	Cluster-10.1128	2.03	-4.889	1.35	-3.622	0.000292	0.0061	SFC-18_S20_L002_4632_soapGraphK61,SFC-18_S20_L002_Contig1149
IFM24_S5_Contig908	Cluster-10.862	2.847	-5.216	1.444	-3.612	0.000304	0.00614	IFM24_S5_Contig908
IFD6_S1_Contig724	Cluster-10.426	2.595	-4.823	1.348	-3.579	0.000345	0.00677	IFD6_S1_Contig724
IFM23_S4_Contig650	Cluster-10.194	4.205	-6.902	1.94	-3.558	0.000374	0.00689	IFM23_S4_Contig650
IFM-049_S6_Contig40827,IFM23_S4_Contig248,SFM-6_S3_L001_Contig2002	Cluster-10.460	5.066	-7.045	1.983	-3.552	0.000382	0.00689	IFM-049_S6_Contig40827,IFM23_S4_Contig248,SFM-6_S3_L001_Contig2002
SFM-8_S8_L001_Contig3593,SFC13_S23_L002_Contig2456,IFM27_S9_Contig416,SFM-5_S2_L001_Contig1404	Cluster-10.583	18.46	5.043	1.418	3.556	0.000377	0.00689	SFM-8_S8_L001_Contig3593,SFC13_S23_L002_Contig2456,IFM27_S9_Contig416,SFM-5_S2_L001_Contig1404
IFM061_S15_Contig778,IFC63_S16_L001_Contig1754,IFM24_S5_Contig822,IFM061_S15_Contig1002,SFM-10_S1_L001_Contig2543,SFM-10_S1_L001_Contig1363,SFM-10_S1_L001_Contig1852,IFM058_S13_Contig1069	Cluster-10.336	12.839	-4.667	1.318	-3.542	0.000397	0.00698	IFM061_S15_Contig778,IFC63_S16_L001_Contig1754,IFM24_S5_Contig822,IFM061_S15_Contig1002,SFM-10_S1_L001_Contig2543,SFM-10_S1_L001_Contig1363,SFM-10_S1_L001_Contig1852,IFM058_S13_Contig1069
IFM53_S14_L001_Contig1695	Cluster-10.1045	15.876	-5.773	1.639	-3.522	0.000429	0.00735	IFM53_S14_L001_Contig1695
IFM054_S12_4055_soapGraphK51,IFM061_S15_Contig1006,IFM047_S10_Contig1227,IFM24_S5_Contig119,SFM-10_S1_L001_Contig2267,SFM-6_S3_L001_Contig994,IFM27_S9_Contig630	Cluster-10.914	61.096	-4.756	1.354	-3.512	0.000445	0.00744	IFM054_S12_4055_soapGraphK51,IFM061_S15_Contig1006,IFM047_S10_Contig1227,IFM24_S5_Contig119,SFM-10_S1_L001_Contig2267,SFM-6_S3_L001_Contig994,IFM27_S9_Contig630
IFM050_S11_Contig1321	Cluster-10.302	0.833	-5.092	1.492	-3.414	0.00064	0.0105	IFM050_S11_Contig1321
SFC17_S7_L001_5645_soapGraphK61,IFC66_S31_L002_Contig1284,SFC17_S7_L001_Contig1428,IFM-049_S6_Contig41041	Cluster-10.942	5.804	-4.854	1.425	-3.406	0.00066	0.0105	SFC17_S7_L001_5645_soapGraphK61,IFC66_S31_L002_Contig1284,SFC17_S7_L001_Contig1428,IFM-049_S6_Contig41041
IFM050_S11_Contig3660,SFM-6_S3_L001_Contig2011	Cluster-10.230	3.373	-4.535	1.349	-3.361	0.000776	0.0121	IFM050_S11_Contig3660,SFM-6_S3_L001_Contig2011
IFM24_S5_20677_soapGraphK31	Cluster-10.878	2.229	-5.594	1.669	-3.351	0.000805	0.0123	IFM24_S5_20677_soapGraphK31
SFC19_S24_L002_Contig1853	Cluster-10.83	7.054	-4.108	1.236	-3.324	0.000887	0.0127	SFC19_S24_L002_Contig1853
IFM23_S4_Contig487,IFM12_S16_Contig824	Cluster-10.767	2.354	-5.377	1.617	-3.325	0.000884	0.0127	IFM23_S4_Contig487,IFM12_S16_Contig824
IFD6_S1_Contig515,SFC22_S9_L001_Contig2828,IFM058_S13_23413_soapGraphK21,IFM047_S10_Contig1080,IFM-049_S6_Contig1427,SFC13_S23_L002_Contig1626,IFM12_S16_Contig506,IFM058_S13_2263_soapGraphK61,SFC22_S9_L001_8626_soapGraphK61,SFC15-CM_S29_L002_Contig1742,IFM26_S8_Contig463,SFM-7_S13_L001_Contig324,IFM53_S14_L001_Contig2475,IFM27_S9_Contig515,IFC63_S16_L001_Contig1646,IFM53_S14_L001_Contig1002,IFM26…	Cluster-10.852	177.17	-2.801	0.84	-3.335	0.000853	0.0127	IFD6_S1_Contig515,SFC22_S9_L001_Contig2828,IFM058_S13_23413_soapGraphK21,IFM047_S10_Contig1080,IFM-049_S6_Contig1427,SFC13_S23_L002_Contig1626,IFM12_S16_Contig506,IFM058_S13_2263_soapGraphK61,SFC22_S9_L001_8626_soapGraphK61,SFC15-CM_S29_L002_Contig1742,IFM26_S8_Contig463,SFM-7_S13_L001_Contig324,IFM53_S14_L001_Contig2475,IFM27_S9_Contig515,IFC63_S16_L001_Contig1646,IFM53_S14_L001_Contig1002,IFM26…
IFM27_S9_Contig290,SFC-18_S20_L002_Contig1591,SFC-18_S20_L002_Contig1459,SFC-18_S20_L002_Contig1119	Cluster-10.147	16.41	-7.594	2.308	-3.291	0.000999	0.0137	IFM27_S9_Contig290,SFC-18_S20_L002_Contig1591,SFC-18_S20_L002_Contig1459,SFC-18_S20_L002_Contig1119
SFC16_S6_L001_Contig1387,SFM-10_S1_L001_Contig1839,IFM061_S15_Contig102,IFM53_S14_L001_Contig1688,IFM53_S14_L001_Contig2438,IFM061_S15_Contig906,SFC16_S6_L001_Contig974,IFM53_S14_L001_Contig1694,IFM53_S14_L001_Contig1011,SFC22_S9_L001_Contig484,IFM061_S15_Contig353,SFC16_S6_L001_Contig536	Cluster-10.939	28.668	-3.596	1.091	-3.297	0.000978	0.0137	SFC16_S6_L001_Contig1387,SFM-10_S1_L001_Contig1839,IFM061_S15_Contig102,IFM53_S14_L001_Contig1688,IFM53_S14_L001_Contig2438,IFM061_S15_Contig906,SFC16_S6_L001_Contig974,IFM53_S14_L001_Contig1694,IFM53_S14_L001_Contig1011,SFC22_S9_L001_Contig484,IFM061_S15_Contig353,SFC16_S6_L001_Contig536
IFM27_S9_1750_soapGraphK61,IFM054_S12_2387_soapGraphK61,IFM047_S10_4772_soapGraphK61,IFM047_S10_Contig1449,IFM047_S10_Contig1010,IFM27_S9_Contig522,IFM047_S10_Contig1085,IFD8_S2_Contig843,IFM054_S12_Contig831,IFD8_S2_Contig613	Cluster-10.516	8.175	-7.191	2.191	-3.282	0.00103	0.0138	IFM27_S9_1750_soapGraphK61,IFM054_S12_2387_soapGraphK61,IFM047_S10_4772_soapGraphK61,IFM047_S10_Contig1449,IFM047_S10_Contig1010,IFM27_S9_Contig522,IFM047_S10_Contig1085,IFD8_S2_Contig843,IFM054_S12_Contig831,IFD8_S2_Contig613
SFM-3_S12_L001_Contig1087,SFC13_S23_L002_Contig2120,SFC13_S23_L002_Contig2737	Cluster-10.672	1.803	-5.383	1.658	-3.246	0.00117	0.0154	SFM-3_S12_L001_Contig1087,SFC13_S23_L002_Contig2120,SFC13_S23_L002_Contig2737
IFM054_S12_2397_soapGraphK61,IFM054_S12_Contig1003,IFM047_S10_Contig1441,IFM047_S10_4642_soapGraphK61	Cluster-10.537	2.281	-6.194	1.918	-3.229	0.00124	0.0158	IFM054_S12_2397_soapGraphK61,IFM054_S12_Contig1003,IFM047_S10_Contig1441,IFM047_S10_4642_soapGraphK61
IFM12_S16_Contig852	Cluster-10.1019	3.589	-5.095	1.577	-3.23	0.00124	0.0158	IFM12_S16_Contig852
IFD6_S1_Contig569,IFM050_S11_8354_soapGraphK61,IFM050_S11_Contig2004	Cluster-10.74	1.547	-4.279	1.328	-3.222	0.00127	0.0159	IFD6_S1_Contig569,IFM050_S11_8354_soapGraphK61,IFM050_S11_Contig2004
IFM12_S16_Contig542,SFM-7_S13_L001_Contig1537,IFM27_S9_Contig326,SFM-7_S13_L001_Contig1840,IFM12_S16_Contig659	Cluster-10.330	12.966	-7.377	2.3	-3.208	0.00134	0.0161	IFM12_S16_Contig542,SFM-7_S13_L001_Contig1537,IFM27_S9_Contig326,SFM-7_S13_L001_Contig1840,IFM12_S16_Contig659
SXC2_S4_L001_Contig1888,SFC13_S23_L002_Contig474,SFM-3_S12_L001_Contig1999,SXC2_S4_L001_Contig645,SFM-3_S12_L001_Contig1038,SFC19_S24_L002_Contig1854,SFC19_S24_L002_5750_soapGraphK61,SFM-3_S12_L001_5025_soapGraphK61,SFC13_S23_L002_Contig2752	Cluster-10.1147	21.084	5.813	1.81	3.211	0.00132	0.0161	SXC2_S4_L001_Contig1888,SFC13_S23_L002_Contig474,SFM-3_S12_L001_Contig1999,SXC2_S4_L001_Contig645,SFM-3_S12_L001_Contig1038,SFC19_S24_L002_Contig1854,SFC19_S24_L002_5750_soapGraphK61,SFM-3_S12_L001_5025_soapGraphK61,SFC13_S23_L002_Contig2752
IFM-049_S6_Contig40765,IFM23_S4_15154_soapGraphK21,IFM-049_S6_Contig40013,SFC16_S6_L001_Contig1624,IFM-049_S6_Contig41245,IFM53_S14_L001_Contig1658,IFM23_S4_Contig696	Cluster-10.208	30.72	-3.486	1.098	-3.174	0.0015	0.0177	IFM-049_S6_Contig40765,IFM23_S4_15154_soapGraphK21,IFM-049_S6_Contig40013,SFC16_S6_L001_Contig1624,IFM-049_S6_Contig41245,IFM53_S14_L001_Contig1658,IFM23_S4_Contig696
IFD6_S1_Contig977	Cluster-10.476	2.269	-4.59	1.447	-3.171	0.00152	0.0177	IFD6_S1_Contig977
IFM23_S4_Contig665	Cluster-10.97	19.294	-2.897	0.926	-3.126	0.00177	0.0202	IFM23_S4_Contig665
SFM-1_S11_L001_Contig1582,SFC17_S7_L001_Contig2016,SFM-1_S11_L001_Contig1151	Cluster-10.498	47.352	-3.912	1.258	-3.108	0.00188	0.0211	SFM-1_S11_L001_Contig1582,SFC17_S7_L001_Contig2016,SFM-1_S11_L001_Contig1151
IFM047_S10_Contig918,IFD8_S2_Contig504,IFM27_S9_Contig291,IFM054_S12_Contig1009,IFM047_S10_Contig1595,IFD8_S2_Contig652,IFM047_S10_Contig1248,IFM23_S4_Contig474,IFD8_S2_Contig365,IFM27_S9_Contig479,IFM27_S9_Contig323,IFD8_S2_Contig406,IFM27_S9_Contig129,IFD8_S2_Contig853	Cluster-10.452	26.358	-4.485	1.457	-3.079	0.00208	0.023	IFM047_S10_Contig918,IFD8_S2_Contig504,IFM27_S9_Contig291,IFM054_S12_Contig1009,IFM047_S10_Contig1595,IFD8_S2_Contig652,IFM047_S10_Contig1248,IFM23_S4_Contig474,IFD8_S2_Contig365,IFM27_S9_Contig479,IFM27_S9_Contig323,IFD8_S2_Contig406,IFM27_S9_Contig129,IFD8_S2_Contig853
SFC14_S17_L001_Contig897,IFM21_S3_Contig923,IFM24_S5_Contig857,IFM53_S14_L001_Contig1645,IFC63_S16_L001_Contig1262,IFM061_S15_Contig494,IFM53_S14_L001_Contig2471,IFM21_S3_Contig959,IFC63_S16_L001_Contig2001,IFM21_S3_Contig872,SFC14_S17_L001_Contig1598,IFC63_S16_L001_Contig2034	Cluster-10.25	16.072	-3.859	1.262	-3.058	0.00223	0.0242	SFC14_S17_L001_Contig897,IFM21_S3_Contig923,IFM24_S5_Contig857,IFM53_S14_L001_Contig1645,IFC63_S16_L001_Contig1262,IFM061_S15_Contig494,IFM53_S14_L001_Contig2471,IFM21_S3_Contig959,IFC63_S16_L001_Contig2001,IFM21_S3_Contig872,SFC14_S17_L001_Contig1598,IFC63_S16_L001_Contig2034
IFM23_S4_Contig683,IFM12_S16_Contig678	Cluster-10.550	3.151	-5.739	1.88	-3.053	0.00227	0.0243	IFM23_S4_Contig683,IFM12_S16_Contig678
IFM-049_S6_Contig34349,IFM050_S11_Contig2180	Cluster-10.89	0.878	-5.008	1.657	-3.023	0.0025	0.0264	IFM-049_S6_Contig34349,IFM050_S11_Contig2180
SFM-3_S12_L001_Contig2004,SFC16_S6_L001_Contig1629,SFC16_S6_L001_4405_soapGraphK61,SFC19_S24_L002_Contig1100,SFC13_S23_L002_Contig2410,IFC66_S31_L002_5336_soapGraphK61,IFD6_S1_Contig728,IFD6_S1_4425_soapGraphK51,IFC66_S31_L002_Contig1545,IFC66_S31_L002_Contig1549,SFC16_S6_L001_Contig1028,IFD6_S1_Contig873,IFC66_S31_L002_Contig1538,IFC66_S31_L002_Contig1294	Cluster-10.839	10.878	5.081	1.689	3.008	0.00263	0.0274	SFM-3_S12_L001_Contig2004,SFC16_S6_L001_Contig1629,SFC16_S6_L001_4405_soapGraphK61,SFC19_S24_L002_Contig1100,SFC13_S23_L002_Contig2410,IFC66_S31_L002_5336_soapGraphK61,IFD6_S1_Contig728,IFD6_S1_4425_soapGraphK51,IFC66_S31_L002_Contig1545,IFC66_S31_L002_Contig1549,SFC16_S6_L001_Contig1028,IFD6_S1_Contig873,IFC66_S31_L002_Contig1538,IFC66_S31_L002_Contig1294
IFM050_S11_Contig3775	Cluster-10.46	1.004	-5.202	1.737	-2.996	0.00274	0.028	IFM050_S11_Contig3775
SFM-10_S1_L001_Contig2538,IFM061_S15_Contig377,IFM26_S8_Contig324,SFU2_S5_L001_Contig1838,SFM-8_S8_L001_10452_soapGraphK61,SFM-8_S8_L001_Contig1003	Cluster-10.1047	16.712	-2.09	0.701	-2.983	0.00286	0.0288	SFM-10_S1_L001_Contig2538,IFM061_S15_Contig377,IFM26_S8_Contig324,SFU2_S5_L001_Contig1838,SFM-8_S8_L001_10452_soapGraphK61,SFM-8_S8_L001_Contig1003
SFC15-CM_S29_L002_Contig1977,IFM53_S14_L001_Contig2087,SFC-18_S20_L002_Contig1907,SFM-10_S1_L001_Contig2545,SFM-1_S11_L001_Contig2045,SFM-10_S1_L001_Contig1304,IFM53_S14_L001_Contig2722,SFC-18_S20_L002_Contig1470	Cluster-10.1182	51.75	2.501	0.848	2.948	0.0032	0.0318	SFC15-CM_S29_L002_Contig1977,IFM53_S14_L001_Contig2087,SFC-18_S20_L002_Contig1907,SFM-10_S1_L001_Contig2545,SFM-1_S11_L001_Contig2045,SFM-10_S1_L001_Contig1304,IFM53_S14_L001_Contig2722,SFC-18_S20_L002_Contig1470
IFM14_S7_Contig566,IFM054_S12_Contig388,IFM047_S10_Contig981,IFD8_S2_Contig1127	Cluster-10.457	8.145	-6.83	2.325	-2.937	0.00331	0.032	IFM14_S7_Contig566,IFM054_S12_Contig388,IFM047_S10_Contig981,IFD8_S2_Contig1127
IFD6_S1_Contig241,IFM050_S11_Contig3760	Cluster-10.571	3.291	-5.591	1.903	-2.938	0.0033	0.032	IFD6_S1_Contig241,IFM050_S11_Contig3760
SXC2_S4_L001_Contig1896	Cluster-10.171	0.897	-5.152	1.79	-2.879	0.00399	0.0368	SXC2_S4_L001_Contig1896
IFM050_S11_Contig3758	Cluster-10.406	1.054	-5.24	1.822	-2.877	0.00402	0.0368	IFM050_S11_Contig3758
IFC66_S31_L002_5302_soapGraphK61,IFM054_S12_Contig1096,IFC66_S31_L002_Contig1318,IFD8_S2_Contig1102,IFM047_S10_Contig1673,IFC66_S31_L002_Contig1561,IFC66_S31_L002_Contig1292,IFD8_S2_Contig603,SFC17_S7_L001_Contig2010,IFC66_S31_L002_Contig1314,IFC66_S31_L002_26065_soapGraphK21	Cluster-10.1090	7.658	-3.963	1.378	-2.876	0.00402	0.0368	IFC66_S31_L002_5302_soapGraphK61,IFM054_S12_Contig1096,IFC66_S31_L002_Contig1318,IFD8_S2_Contig1102,IFM047_S10_Contig1673,IFC66_S31_L002_Contig1561,IFC66_S31_L002_Contig1292,IFD8_S2_Contig603,SFC17_S7_L001_Contig2010,IFC66_S31_L002_Contig1314,IFC66_S31_L002_26065_soapGraphK21
IFM12_S16_Contig677,IFC63_S16_L001_Contig1240,SFU-3_S21_L002_Contig1429,IFM24_S5_Contig983,IFM53_S14_L001_Contig1656,IFM53_S14_L001_Contig1687,IFM061_S15_Contig965,IFC66_S31_L002_Contig1289,IFC66_S31_L002_5262_soapGraphK61,IFM12_S16_Contig530,IFM061_S15_Contig996,IFC66_S31_L002_Contig1574	Cluster-10.1158	19.585	-4.868	1.685	-2.888	0.00388	0.0368	IFM12_S16_Contig677,IFC63_S16_L001_Contig1240,SFU-3_S21_L002_Contig1429,IFM24_S5_Contig983,IFM53_S14_L001_Contig1656,IFM53_S14_L001_Contig1687,IFM061_S15_Contig965,IFC66_S31_L002_Contig1289,IFC66_S31_L002_5262_soapGraphK61,IFM12_S16_Contig530,IFM061_S15_Contig996,IFC66_S31_L002_Contig1574
IFM050_S11_Contig3632	Cluster-10.161	1.935	-5.781	2.014	-2.871	0.00409	0.0369	IFM050_S11_Contig3632
IFM21_S3_8077_soapGraphK41,SFM-5_S2_L001_Contig1938,SFU2_S5_L001_Contig1469,IFM53_S14_L001_Contig2091,IFM-049_S6_Contig40786,IFC63_S16_L001_Contig2074,IFM061_S15_Contig894,IFM24_S5_Contig914,IFM21_S3_Contig814,IFM24_S5_Contig968,IFM058_S13_Contig843,IFC66_S31_L002_Contig1573,IFM-049_S6_Contig32841,IFM061_S15_Contig968,IFM058_S13_Contig438	Cluster-10.1108	62.87	-3.952	1.404	-2.815	0.00488	0.0435	IFM21_S3_8077_soapGraphK41,SFM-5_S2_L001_Contig1938,SFU2_S5_L001_Contig1469,IFM53_S14_L001_Contig2091,IFM-049_S6_Contig40786,IFC63_S16_L001_Contig2074,IFM061_S15_Contig894,IFM24_S5_Contig914,IFM21_S3_Contig814,IFM24_S5_Contig968,IFM058_S13_Contig843,IFC66_S31_L002_Contig1573,IFM-049_S6_Contig32841,IFM061_S15_Contig968,IFM058_S13_Contig438
IFM050_S11_Contig3411	Cluster-10.455	1.548	-4.929	1.772	-2.781	0.00541	0.0476	IFM050_S11_Contig3411
IFM53_S14_L001_Contig2124,SXC2_S4_L001_Contig1873,SXC2_S4_L001_Contig1853,SXC2_S4_L001_Contig1875,SFM-1_S11_L001_Contig2099,SXC2_S4_L001_Contig1877,SFU2_S5_L001_Contig1085,SXC2_S4_L001_Contig1907	Cluster-10.548	11.766	4.715	1.701	2.772	0.00556	0.0477	IFM53_S14_L001_Contig2124,SXC2_S4_L001_Contig1873,SXC2_S4_L001_Contig1853,SXC2_S4_L001_Contig1875,SFM-1_S11_L001_Contig2099,SXC2_S4_L001_Contig1877,SFU2_S5_L001_Contig1085,SXC2_S4_L001_Contig1907
IFC66_S31_L002_Contig1523,IFM21_S3_Contig945,IFM21_S3_2515_soapGraphK61	Cluster-270.2	7.367	-4.114	1.482	-2.775	0.00551	0.0477	IFC66_S31_L002_Contig1523,IFM21_S3_Contig945,IFM21_S3_2515_soapGraphK61
IFD6_S1_Contig575	Cluster-10.572	4.103	-6.257	2.267	-2.76	0.00578	0.0483	IFD6_S1_Contig575
SFM-8_S8_L001_Contig2437	Cluster-10.884	1.463	-4.017	1.455	-2.761	0.00577	0.0483	SFM-8_S8_L001_Contig2437
IFM054_S12_Contig1090,IFM047_S10_Contig1657	Cluster-10.989	3.303	-5.934	2.162	-2.745	0.00606	0.0501	IFM054_S12_Contig1090,IFM047_S10_Contig1657
IFM054_S12_19177_soapGraphK31,IFM054_S12_Contig879,IFM53_S14_L001_Contig2572,IFM047_S10_Contig1619	Cluster-10.1123	3.061	-4.917	1.794	-2.74	0.00614	0.0501	IFM054_S12_19177_soapGraphK31,IFM054_S12_Contig879,IFM53_S14_L001_Contig2572,IFM047_S10_Contig1619
IFM21_S3_Contig921,IFM21_S3_Contig613,SFM-10_S1_L001_Contig2239,IFC63_S16_L001_Contig2075,IFM061_S15_Contig1003,SFM-7_S13_L001_Contig2088,IFM24_S5_Contig980	Cluster-10.223	13.894	-2.789	1.021	-2.731	0.00631	0.0503	IFM21_S3_Contig921,IFM21_S3_Contig613,SFM-10_S1_L001_Contig2239,IFC63_S16_L001_Contig2075,IFM061_S15_Contig1003,SFM-7_S13_L001_Contig2088,IFM24_S5_Contig980
IFM56_S15_14655_soapGraphK41	Cluster-10.1093	4.133	-2.471	0.905	-2.731	0.00631	0.0503	IFM56_S15_14655_soapGraphK41
SXC2_S4_L001_Contig358,SFM-3_S12_L001_Contig528,SFC13_S23_L002_Contig472,SFC19_S24_L002_Contig2100	Cluster-10.890	7.617	6.241	2.293	2.722	0.00649	0.0512	SXC2_S4_L001_Contig358,SFM-3_S12_L001_Contig528,SFC13_S23_L002_Contig472,SFC19_S24_L002_Contig2100
IFM050_S11_Contig3787,IFM56_S15_Contig1205,IFM56_S15_Contig1568,IFM56_S15_Contig938,IFM23_S4_Contig581	Cluster-10.440	0.806	-3.678	1.354	-2.717	0.00659	0.0514	IFM050_S11_Contig3787,IFM56_S15_Contig1205,IFM56_S15_Contig1568,IFM56_S15_Contig938,IFM23_S4_Contig581
SFM-10_S1_L001_Contig2263,IFM054_S12_Contig895,IFM061_S15_Contig296,IFM061_S15_2304_soapGraphK61,IFC63_S16_L001_Contig1628,IFM24_S5_Contig585,SFM-10_S1_L001_Contig2579,IFM047_S10_Contig287,SFM-6_S3_L001_Contig1460,SFM-6_S3_L001_Contig1726,IFM047_S10_Contig975,IFM24_S5_2219_soapGraphK61,IFM24_S5_Contig623,IFM047_S10_Contig1568	Cluster-10.921	29.425	-4.131	1.53	-2.7	0.00693	0.0534	SFM-10_S1_L001_Contig2263,IFM054_S12_Contig895,IFM061_S15_Contig296,IFM061_S15_2304_soapGraphK61,IFC63_S16_L001_Contig1628,IFM24_S5_Contig585,SFM-10_S1_L001_Contig2579,IFM047_S10_Contig287,SFM-6_S3_L001_Contig1460,SFM-6_S3_L001_Contig1726,IFM047_S10_Contig975,IFM24_S5_2219_soapGraphK61,IFM24_S5_Contig623,IFM047_S10_Contig1568
SFU2_S5_L001_Contig1452,SFM-8_S8_L001_Contig3121,SFC17_S7_L001_Contig1416,IFM050_S11_Contig3793,IFD6_S1_Contig417,SFM-8_S8_L001_Contig3132,IFC66_S31_L002_Contig1816,IFM047_S10_Contig997,SFC17_S7_L001_Contig1390,IFM047_S10_Contig1251,IFC66_S31_L002_Contig1575,SFC22_S9_L001_Contig2848,SFC22_S9_L001_8814_soapGraphK61,SFM-10_S1_L001_Contig1812,IFM27_S9_Contig418,SFM-8_S8_L001_Contig2977,IFC66_S31_L00…	Cluster-10.997	37.31	-2.362	0.881	-2.682	0.00732	0.0558	SFU2_S5_L001_Contig1452,SFM-8_S8_L001_Contig3121,SFC17_S7_L001_Contig1416,IFM050_S11_Contig3793,IFD6_S1_Contig417,SFM-8_S8_L001_Contig3132,IFC66_S31_L002_Contig1816,IFM047_S10_Contig997,SFC17_S7_L001_Contig1390,IFM047_S10_Contig1251,IFC66_S31_L002_Contig1575,SFC22_S9_L001_Contig2848,SFC22_S9_L001_8814_soapGraphK61,SFM-10_S1_L001_Contig1812,IFM27_S9_Contig418,SFM-8_S8_L001_Contig2977,IFC66_S31_L00…
IFC66_S31_L002_Contig1860	Cluster-10.348	47.607	-1.805	0.682	-2.648	0.00809	0.061	IFC66_S31_L002_Contig1860
IFM14_S7_Contig292,IFM050_S11_Contig3299	Cluster-10.140	3.119	-5.509	2.092	-2.634	0.00844	0.0628	IFM14_S7_Contig292,IFM050_S11_Contig3299
IFM53_S14_L001_Contig1147	Cluster-10.491	0.786	-4.956	1.889	-2.624	0.0087	0.0628	IFM53_S14_L001_Contig1147
SFC13_S23_L002_19440_soapGraphK41,SFC13_S23_L002_Contig2757,IFM050_S11_82192_soapGraphK21	Cluster-10.1086	1188.3	-1.286	0.49	-2.624	0.00869	0.0628	SFC13_S23_L002_19440_soapGraphK41,SFC13_S23_L002_Contig2757,IFM050_S11_82192_soapGraphK21
SFC-21_S22_L002_Contig2162,SFC-21_S22_L002_Contig2524,SFM-8_S8_L001_10508_soapGraphK61,SFM-8_S8_L001_Contig3146,SFU2_S5_L001_Contig1712,IFM21_S3_Contig518,SFC-023_S32_L002_Contig966,SFU-3_S21_L002_Contig1777,SFC17_S7_L001_Contig1979,SFC14_S17_L001_Contig2163,IFM054_S12_Contig755,SFC22_S9_L001_Contig3194	Cluster-10.1131	633.698	1.833	0.699	2.624	0.00869	0.0628	SFC-21_S22_L002_Contig2162,SFC-21_S22_L002_Contig2524,SFM-8_S8_L001_10508_soapGraphK61,SFM-8_S8_L001_Contig3146,SFU2_S5_L001_Contig1712,IFM21_S3_Contig518,SFC-023_S32_L002_Contig966,SFU-3_S21_L002_Contig1777,SFC17_S7_L001_Contig1979,SFC14_S17_L001_Contig2163,IFM054_S12_Contig755,SFC22_S9_L001_Contig3194
IFM56_S15_Contig1227,IFM12_S16_Contig589,IFM23_S4_Contig639	Cluster-10.200	2.39	-5.437	2.081	-2.613	0.00898	0.0642	IFM56_S15_Contig1227,IFM12_S16_Contig589,IFM23_S4_Contig639
IFM047_S10_Contig1427,SFM-8_S8_L001_Contig3567,IFM061_S15_Contig899,IFM21_S3_Contig941,SFC16_S6_L001_Contig1625,SFC15-CM_S29_L002_Contig1035,IFM050_S11_Contig3745,SFU2_S5_L001_Contig1259,IFM058_S13_Contig1023,IFC63_S16_L001_Contig2033,SFC-18_S20_L002_Contig637,IFC66_S31_L002_25957_soapGraphK21	Cluster-10.1146	13	-1.91	0.732	-2.608	0.0091	0.0644	IFM047_S10_Contig1427,SFM-8_S8_L001_Contig3567,IFM061_S15_Contig899,IFM21_S3_Contig941,SFC16_S6_L001_Contig1625,SFC15-CM_S29_L002_Contig1035,IFM050_S11_Contig3745,SFU2_S5_L001_Contig1259,IFM058_S13_Contig1023,IFC63_S16_L001_Contig2033,SFC-18_S20_L002_Contig637,IFC66_S31_L002_25957_soapGraphK21
IFM050_S11_Contig2266	Cluster-10.244	0.988	-4.993	1.919	-2.602	0.00926	0.0648	IFM050_S11_Contig2266
IFM050_S11_Contig1857	Cluster-10.80	0.842	-4.937	1.918	-2.574	0.0101	0.0689	IFM050_S11_Contig1857
IFM57_S30_L002_Contig1668	Cluster-10.347	2.504	-3.586	1.393	-2.575	0.01	0.0689	IFM57_S30_L002_Contig1668
IFM14_S7_2959_soapGraphK61,SFM-7_S13_L001_Contig1881,SFM-7_S13_L001_5208_soapGraphK61,IFM14_S7_Contig377	Cluster-10.707	3.913	-5.606	2.18	-2.571	0.0101	0.0689	IFM14_S7_2959_soapGraphK61,SFM-7_S13_L001_Contig1881,SFM-7_S13_L001_5208_soapGraphK61,IFM14_S7_Contig377
SFC19_S24_L002_Contig1094,SFC19_S24_L002_Contig636,SFC19_S24_L002_Contig1102,SXC2_S4_L001_Contig798,SFC13_S23_L002_Contig1100,SXC2_S4_L001_Contig1305,SFM-3_S12_L001_Contig1068	Cluster-10.95	40.302	4.204	1.645	2.555	0.0106	0.0707	SFC19_S24_L002_Contig1094,SFC19_S24_L002_Contig636,SFC19_S24_L002_Contig1102,SXC2_S4_L001_Contig798,SFC13_S23_L002_Contig1100,SXC2_S4_L001_Contig1305,SFM-3_S12_L001_Contig1068
IFM047_S10_Contig1045,IFD6_S1_Contig683,SFU2_S5_L001_Contig990,SFC-18_S20_L002_Contig665,IFM054_S12_Contig393,SFC13_S23_L002_Contig2469,SFM-3_S12_L001_Contig484,IFM27_S9_Contig318,IFM054_S12_Contig1068,IFM21_S3_Contig1062,IFM21_S3_Contig611,IFM050_S11_Contig3396,IFM050_S11_8064_soapGraphK61,SFC22_S9_L001_8484_soapGraphK61,SFM-10_S1_L001_Contig1349,SFM-8_S8_L001_Contig3092,SFM-3_S12_L001_Contig144…	Cluster-10.1135	102.714	-1.763	0.689	-2.558	0.0105	0.0707	IFM047_S10_Contig1045,IFD6_S1_Contig683,SFU2_S5_L001_Contig990,SFC-18_S20_L002_Contig665,IFM054_S12_Contig393,SFC13_S23_L002_Contig2469,SFM-3_S12_L001_Contig484,IFM27_S9_Contig318,IFM054_S12_Contig1068,IFM21_S3_Contig1062,IFM21_S3_Contig611,IFM050_S11_Contig3396,IFM050_S11_8064_soapGraphK61,SFC22_S9_L001_8484_soapGraphK61,SFM-10_S1_L001_Contig1349,SFM-8_S8_L001_Contig3092,SFM-3_S12_L001_Contig144…
SFC-18_S20_L002_Contig1035	Cluster-10.386	3.636	-5.937	2.33	-2.548	0.0108	0.0715	SFC-18_S20_L002_Contig1035
IFM12_S16_Contig381	Cluster-10.312	10.356	-4.034	1.601	-2.52	0.0117	0.0741	IFM12_S16_Contig381
IFC63_S16_L001_Contig174	Cluster-10.542	3.413	-4.506	1.791	-2.516	0.0119	0.0741	IFC63_S16_L001_Contig174
IFM054_S12_Contig901	Cluster-10.667	2.249	-5.652	2.245	-2.518	0.0118	0.0741	IFM054_S12_Contig901
IFM047_S10_Contig1634	Cluster-10.671	8.259	-2.297	0.91	-2.524	0.0116	0.0741	IFM047_S10_Contig1634
IFD6_S1_Contig893,IFM-049_S6_Contig40915	Cluster-10.922	55.648	-4.17	1.653	-2.523	0.0116	0.0741	IFD6_S1_Contig893,IFM-049_S6_Contig40915
SFC22_S9_L001_8670_soapGraphK61,IFM21_S3_4107_soapGraphK51,SFC13_S23_L002_Contig2646,IFM047_S10_Contig1160,IFC63_S16_L001_Contig1855,IFM21_S3_Contig748,SFU2_S5_L001_Contig1411,IFC66_S31_L002_Contig1519,IFM21_S3_Contig1030,SFC17_S7_L001_Contig1713,IFM050_S11_Contig3743	Cluster-10.1157	15.601	-1.819	0.72	-2.526	0.0115	0.0741	SFC22_S9_L001_8670_soapGraphK61,IFM21_S3_4107_soapGraphK51,SFC13_S23_L002_Contig2646,IFM047_S10_Contig1160,IFC63_S16_L001_Contig1855,IFM21_S3_Contig748,SFU2_S5_L001_Contig1411,IFC66_S31_L002_Contig1519,IFM21_S3_Contig1030,SFC17_S7_L001_Contig1713,IFM050_S11_Contig3743
SFC17_S7_L001_Contig1990,IFM050_S11_Contig3778	Cluster-10.470	1.832	-4.722	1.883	-2.507	0.0122	0.0752	SFC17_S7_L001_Contig1990,IFM050_S11_Contig3778
IFC66_S31_L002_Contig293	Cluster-10.842	3.255	5.166	2.072	2.493	0.0127	0.0776	IFC66_S31_L002_Contig293
IFM56_S15_Contig393,IFM23_S4_Contig649	Cluster-10.13	3.09	-5.789	2.331	-2.484	0.013	0.0789	IFM56_S15_Contig393,IFM23_S4_Contig649
IFM058_S13_23411_soapGraphK21,SFU-3_S21_L002_Contig637,IFM058_S13_Contig1032,SFC14_S17_L001_Contig2283,IFM058_S13_2389_soapGraphK61,IFM060_S14_Contig341,SFM-8_S8_L001_Contig3589,SFC14_S17_L001_Contig784,IFM060_S14_Contig226,SFC14_S17_L001_Contig1139,SFC14_S17_L001_Contig2383,SFC17_S7_L001_Contig1322,SFC22_S9_L001_Contig1652,IFM060_S14_Contig188,SFC14_S17_L001_Contig2367,SFC17_S7_L001_Contig1996,S…	Cluster-10.1058	14.401	3.79	1.53	2.477	0.0132	0.0797	IFM058_S13_23411_soapGraphK21,SFU-3_S21_L002_Contig637,IFM058_S13_Contig1032,SFC14_S17_L001_Contig2283,IFM058_S13_2389_soapGraphK61,IFM060_S14_Contig341,SFM-8_S8_L001_Contig3589,SFC14_S17_L001_Contig784,IFM060_S14_Contig226,SFC14_S17_L001_Contig1139,SFC14_S17_L001_Contig2383,SFC17_S7_L001_Contig1322,SFC22_S9_L001_Contig1652,IFM060_S14_Contig188,SFC14_S17_L001_Contig2367,SFC17_S7_L001_Contig1996,S…
SFC16_S6_L001_Contig1630	Cluster-10.212	1.376	-5.261	2.133	-2.466	0.0137	0.0813	SFC16_S6_L001_Contig1630
SFC15-CM_S29_L002_Contig1706,SFC13_S23_L002_6180_soapGraphK61,IFM27_S9_Contig594,IFM050_S11_Contig3766,SFC15-CM_S29_L002_4551_soapGraphK61,IFM56_S15_Contig1566,SFC13_S23_L002_Contig2699,IFM050_S11_Contig3413,SFC15-CM_S29_L002_Contig1928,SFC13_S23_L002_Contig2727,SFM-3_S12_L001_Contig1362,SFC15-CM_S29_L002_Contig1958	Cluster-10.673	14.584	-3.81	1.547	-2.464	0.0138	0.0813	SFC15-CM_S29_L002_Contig1706,SFC13_S23_L002_6180_soapGraphK61,IFM27_S9_Contig594,IFM050_S11_Contig3766,SFC15-CM_S29_L002_4551_soapGraphK61,IFM56_S15_Contig1566,SFC13_S23_L002_Contig2699,IFM050_S11_Contig3413,SFC15-CM_S29_L002_Contig1928,SFC13_S23_L002_Contig2727,SFM-3_S12_L001_Contig1362,SFC15-CM_S29_L002_Contig1958
SFM-7_S13_L001_5036_soapGraphK61,SFM-7_S13_L001_Contig1863	Cluster-10.201	1.496	-3.12	1.273	-2.451	0.0142	0.0814	SFM-7_S13_L001_5036_soapGraphK61,SFM-7_S13_L001_Contig1863
IFM12_S16_Contig850	Cluster-10.703	0.711	-3.509	1.43	-2.454	0.0141	0.0814	IFM12_S16_Contig850
IFM054_S12_Contig905	Cluster-10.831	5.182	-4.924	2.006	-2.454	0.0141	0.0814	IFM054_S12_Contig905
IFM047_S10_Contig1223	Cluster-80.0	0.9	-4.923	2.005	-2.455	0.0141	0.0814	IFM047_S10_Contig1223
SFM-3_S12_L001_Contig1021,SXC2_S4_L001_Contig1900	Cluster-10.519	2.247	5.225	2.14	2.442	0.0146	0.0828	SFM-3_S12_L001_Contig1021,SXC2_S4_L001_Contig1900
IFM-049_S6_Contig41218	Cluster-10.725	5.404	-3.453	1.42	-2.431	0.0151	0.0846	IFM-049_S6_Contig41218
IFM27_S9_Contig521,IFM27_S9_1776_soapGraphK61,IFM27_S9_Contig528	Cluster-10.803	4.05	-5.011	2.067	-2.425	0.0153	0.0854	IFM27_S9_Contig521,IFM27_S9_1776_soapGraphK61,IFM27_S9_Contig528
SFU-3_S21_L002_Contig1977	Cluster-10.778	0.845	-4.853	2.005	-2.42	0.0155	0.0857	SFU-3_S21_L002_Contig1977
IFM27_S9_Contig409	Cluster-80.1	1.294	-5.144	2.13	-2.415	0.0157	0.0863	IFM27_S9_Contig409
SFC13_S23_L002_Contig2731,SFC13_S23_L002_Contig1761,SFM-3_S12_L001_Contig1767,IFC66_S31_L002_Contig1553,SFC19_S24_L002_Contig1155,SFC16_S6_L001_Contig1022,SFC13_S23_L002_6866_soapGraphK61	Cluster-10.843	6.459	4.9	2.043	2.398	0.0165	0.0896	SFC13_S23_L002_Contig2731,SFC13_S23_L002_Contig1761,SFM-3_S12_L001_Contig1767,IFC66_S31_L002_Contig1553,SFC19_S24_L002_Contig1155,SFC16_S6_L001_Contig1022,SFC13_S23_L002_6866_soapGraphK61
SFM-7_S13_L001_Contig950,IFM27_S9_Contig622,IFM047_S10_Contig1152	Cluster-10.549	1.919	-4.895	2.05	-2.387	0.017	0.0908	SFM-7_S13_L001_Contig950,IFM27_S9_Contig622,IFM047_S10_Contig1152
IFM060_S14_Contig369,IFC66_S31_L002_Contig579,IFM060_S14_Contig343,IFC66_S31_L002_Contig1546,IFM054_S12_Contig492,IFC66_S31_L002_Contig1011	Cluster-10.869	13.151	-2.873	1.204	-2.385	0.0171	0.0908	IFM060_S14_Contig369,IFC66_S31_L002_Contig579,IFM060_S14_Contig343,IFC66_S31_L002_Contig1546,IFM054_S12_Contig492,IFC66_S31_L002_Contig1011
SFU2_S5_L001_Contig1891	Cluster-10.1060	11.059	-3.858	1.614	-2.39	0.0168	0.0908	SFU2_S5_L001_Contig1891
IFM-049_S6_Contig2945	Cluster-10.558	2.423	-5.547	2.332	-2.378	0.0174	0.0918	IFM-049_S6_Contig2945
SFC17_S7_L001_Contig924,SFC14_S17_L001_Contig2408,SFU-3_S21_L002_Contig2034	Cluster-10.142	2.135	-3.815	1.611	-2.369	0.0178	0.092	SFC17_S7_L001_Contig924,SFC14_S17_L001_Contig2408,SFU-3_S21_L002_Contig2034
IFM27_S9_Contig623,IFM050_S11_Contig2529,IFM27_S9_Contig574	Cluster-10.553	0.837	-4.084	1.726	-2.366	0.018	0.092	IFM27_S9_Contig623,IFM050_S11_Contig2529,IFM27_S9_Contig574
SFC17_S7_L001_Contig1425,SFC17_S7_L001_Contig1983,SFC17_S7_L001_5529_soapGraphK61,SFC17_S7_L001_9062_soapGraphK51,IFC66_S31_L002_Contig1769,SFC17_S7_L001_Contig1016	Cluster-10.806	3.077	-3.387	1.429	-2.37	0.0178	0.092	SFC17_S7_L001_Contig1425,SFC17_S7_L001_Contig1983,SFC17_S7_L001_5529_soapGraphK61,SFC17_S7_L001_9062_soapGraphK51,IFC66_S31_L002_Contig1769,SFC17_S7_L001_Contig1016
IFC66_S31_L002_Contig1551,IFM058_S13_Contig375,SFC-18_S20_L002_Contig988,IFM058_S13_Contig1071,IFM058_S13_Contig848,IFM24_S5_Contig817,IFM061_S15_Contig895	Cluster-10.880	3.631	-2.814	1.187	-2.37	0.0178	0.092	IFC66_S31_L002_Contig1551,IFM058_S13_Contig375,SFC-18_S20_L002_Contig988,IFM058_S13_Contig1071,IFM058_S13_Contig848,IFM24_S5_Contig817,IFM061_S15_Contig895
IFC66_S31_L002_Contig1857	Cluster-10.93	2.372	-5.505	2.333	-2.36	0.0183	0.0923	IFC66_S31_L002_Contig1857
SFM-3_S12_L001_Contig1880,SFC13_S23_L002_Contig2745,SFC13_S23_L002_Contig1744,SXC2_S4_L001_Contig1676,SFC13_S23_L002_Contig2419,SFM-7_S13_L001_Contig839	Cluster-10.822	5.214	4.61	1.953	2.361	0.0182	0.0923	SFM-3_S12_L001_Contig1880,SFC13_S23_L002_Contig2745,SFC13_S23_L002_Contig1744,SXC2_S4_L001_Contig1676,SFC13_S23_L002_Contig2419,SFM-7_S13_L001_Contig839
IFM27_S9_Contig626,IFM23_S4_15102_soapGraphK21	Cluster-10.892	32.871	-3.743	1.592	-2.352	0.0187	0.0935	IFM27_S9_Contig626,IFM23_S4_15102_soapGraphK21
IFM050_S11_Contig3797	Cluster-10.44	0.658	-4.452	1.907	-2.335	0.0196	0.0972	IFM050_S11_Contig3797
IFM058_S13_Contig1085,IFM-049_S6_Contig39675,IFM047_S10_Contig1626	Cluster-10.122	4.309	-4.205	1.832	-2.296	0.0217	0.0991	IFM058_S13_Contig1085,IFM-049_S6_Contig39675,IFM047_S10_Contig1626
SFC22_S9_L001_Contig1688	Cluster-10.287	1.885	4.983	2.164	2.302	0.0213	0.0991	SFC22_S9_L001_Contig1688
SFM-10_S1_L001_Contig1722	Cluster-10.502	1.512	-2.341	1.01	-2.318	0.0204	0.0991	SFM-10_S1_L001_Contig1722
SFM-8_S8_L001_Contig1389,SFC17_S7_L001_Contig1373,SFC22_S9_L001_Contig2985,SFC22_S9_L001_8686_soapGraphK61,IFM058_S13_Contig1037,IFM57_S30_L002_23855_soapGraphK21,SFM-5_S2_L001_Contig842,SFM-8_S8_L001_Contig3084,IFM57_S30_L002_Contig1007,IFM058_S13_Contig684,SFC22_S9_L001_8612_soapGraphK61,SFC22_S9_L001_Contig2806,SFC17_S7_L001_Contig988,SFC22_S9_L001_Contig2842,SFM-8_S8_L001_Contig3362,IFM058_S1…	Cluster-10.600	6.745	2.347	1.015	2.311	0.0208	0.0991	SFM-8_S8_L001_Contig1389,SFC17_S7_L001_Contig1373,SFC22_S9_L001_Contig2985,SFC22_S9_L001_8686_soapGraphK61,IFM058_S13_Contig1037,IFM57_S30_L002_23855_soapGraphK21,SFM-5_S2_L001_Contig842,SFM-8_S8_L001_Contig3084,IFM57_S30_L002_Contig1007,IFM058_S13_Contig684,SFC22_S9_L001_8612_soapGraphK61,SFC22_S9_L001_Contig2806,SFC17_S7_L001_Contig988,SFC22_S9_L001_Contig2842,SFM-8_S8_L001_Contig3362,IFM058_S1…
IFM058_S13_Contig515,SFM-8_S8_L001_Contig3145,SFM-8_S8_L001_Contig3559,IFM058_S13_Contig1050,IFM57_S30_L002_Contig604,SFM-8_S8_L001_Contig3588,IFM058_S13_Contig1094	Cluster-10.657	4.235	-3.933	1.708	-2.303	0.0213	0.0991	IFM058_S13_Contig515,SFM-8_S8_L001_Contig3145,SFM-8_S8_L001_Contig3559,IFM058_S13_Contig1050,IFM57_S30_L002_Contig604,SFM-8_S8_L001_Contig3588,IFM058_S13_Contig1094
IFM27_S9_Contig413,IFM047_S10_Contig1180,IFC66_S31_L002_Contig1309,IFM047_S10_4554_soapGraphK61,SFC22_S9_L001_8606_soapGraphK61,SFM-8_S8_L001_Contig1667,SFC22_S9_L001_Contig2831,IFC66_S31_L002_5198_soapGraphK61,IFM050_S11_8078_soapGraphK61,IFM050_S11_Contig3403,IFC66_S31_L002_Contig1311,SFM-10_S1_L001_Contig173	Cluster-10.682	13.141	-2.202	0.956	-2.303	0.0213	0.0991	IFM27_S9_Contig413,IFM047_S10_Contig1180,IFC66_S31_L002_Contig1309,IFM047_S10_4554_soapGraphK61,SFC22_S9_L001_8606_soapGraphK61,SFM-8_S8_L001_Contig1667,SFC22_S9_L001_Contig2831,IFC66_S31_L002_5198_soapGraphK61,IFM050_S11_8078_soapGraphK61,IFM050_S11_Contig3403,IFC66_S31_L002_Contig1311,SFM-10_S1_L001_Contig173
SFM-7_S13_L001_Contig1504,SFM-7_S13_L001_Contig1888,SFM-7_S13_L001_5180_soapGraphK61,IFM14_S7_Contig499	Cluster-10.708	7.166	-5.126	2.231	-2.298	0.0216	0.0991	SFM-7_S13_L001_Contig1504,SFM-7_S13_L001_Contig1888,SFM-7_S13_L001_5180_soapGraphK61,IFM14_S7_Contig499
IFM058_S13_Contig1021	Cluster-10.718	2.224	-2.167	0.933	-2.322	0.0202	0.0991	IFM058_S13_Contig1021
IFC66_S31_L002_Contig804	Cluster-10.760	1.24	4.684	2.02	2.319	0.0204	0.0991	IFC66_S31_L002_Contig804
IFC66_S31_L002_Contig1848	Cluster-10.959	1.581	-5.193	2.251	-2.308	0.021	0.0991	IFC66_S31_L002_Contig1848
IFM53_S14_L001_Contig2130,SFM-6_S3_L001_Contig647,IFD8_S2_Contig339,SFC22_S9_L001_Contig2305	Cluster-10.960	3.745	-2.877	1.248	-2.306	0.0211	0.0991	IFM53_S14_L001_Contig2130,SFM-6_S3_L001_Contig647,IFD8_S2_Contig339,SFC22_S9_L001_Contig2305
IFM21_S3_Contig773,IFC63_S16_L001_Contig2091,IFC66_S31_L002_Contig1320,IFM53_S14_L001_Contig2103,SFM-7_S13_L001_Contig1553,SFM-10_S1_L001_Contig2262,IFM21_S3_Contig598,IFM24_S5_Contig685,IFM061_S15_Contig948,IFM21_S3_Contig597,SFM-7_S13_L001_Contig1527,SFM-10_S1_L001_Contig1289	Cluster-10.1098	50.519	-3.238	1.41	-2.297	0.0216	0.0991	IFM21_S3_Contig773,IFC63_S16_L001_Contig2091,IFC66_S31_L002_Contig1320,IFM53_S14_L001_Contig2103,SFM-7_S13_L001_Contig1553,SFM-10_S1_L001_Contig2262,IFM21_S3_Contig598,IFM24_S5_Contig685,IFM061_S15_Contig948,IFM21_S3_Contig597,SFM-7_S13_L001_Contig1527,SFM-10_S1_L001_Contig1289
SFM-3_S12_L001_Contig1894	Cluster-10.719	1.428	4.063	1.777	2.287	0.0222	0.101	SFM-3_S12_L001_Contig1894
IFM050_S11_8262_soapGraphK61,IFM050_S11_Contig3412	Cluster-10.169	2.019	-5.282	2.334	-2.263	0.0236	0.107	IFM050_S11_8262_soapGraphK61,IFM050_S11_Contig3412
IFD6_S1_Contig872	Cluster-97.0	1.97	-5.257	2.334	-2.252	0.0243	0.109	IFD6_S1_Contig872
IFC63_S16_L001_Contig1207,SFU-3_S21_L002_Contig620,IFM061_S15_Contig979,SFU-3_S21_L002_Contig1456,IFM53_S14_L001_Contig911,IFM53_S14_L001_Contig1139,IFM24_S5_Contig536,SFU-3_S21_L002_Contig548	Cluster-10.616	8.393	-3.746	1.669	-2.245	0.0248	0.11	IFC63_S16_L001_Contig1207,SFU-3_S21_L002_Contig620,IFM061_S15_Contig979,SFU-3_S21_L002_Contig1456,IFM53_S14_L001_Contig911,IFM53_S14_L001_Contig1139,IFM24_S5_Contig536,SFU-3_S21_L002_Contig548
IFM26_S8_Contig208,SFM-10_S1_L001_Contig2578,IFM047_S10_Contig1671,SFU-3_S21_L002_Contig1471,SFC14_S17_L001_Contig481,IFM53_S14_L001_Contig2668,SFC17_S7_L001_Contig1012,IFM054_S12_Contig617,SFM-10_S1_L001_Contig622,IFD8_S2_Contig835,IFM27_S9_Contig224,IFM53_S14_L001_Contig2454,IFM050_S11_Contig3789	Cluster-10.990	119.765	-1.457	0.653	-2.23	0.0257	0.114	IFM26_S8_Contig208,SFM-10_S1_L001_Contig2578,IFM047_S10_Contig1671,SFU-3_S21_L002_Contig1471,SFC14_S17_L001_Contig481,IFM53_S14_L001_Contig2668,SFC17_S7_L001_Contig1012,IFM054_S12_Contig617,SFM-10_S1_L001_Contig622,IFD8_S2_Contig835,IFM27_S9_Contig224,IFM53_S14_L001_Contig2454,IFM050_S11_Contig3789
IFC66_S31_L002_5110_soapGraphK61,IFC66_S31_L002_Contig851	Cluster-10.1015	9.357	-4.389	1.981	-2.216	0.0267	0.117	IFC66_S31_L002_5110_soapGraphK61,IFC66_S31_L002_Contig851
IFM14_S7_Contig578	Cluster-10.659	0.909	-3.131	1.419	-2.207	0.0273	0.118	IFM14_S7_Contig578
SFU-3_S21_L002_30243_soapGraphK21,SFM-3_S12_L001_Contig1761,SFM-3_S12_L001_Contig1754,SFU-3_S21_L002_Contig1466,SFM-3_S12_L001_5196_soapGraphK61,SXC2_S4_L001_Contig1887,SFM-7_S13_L001_Contig1499,IFM27_S9_Contig325,IFM27_S9_Contig519,IFD8_S2_Contig1128,IFM047_S10_Contig233,SFC15-CM_S29_L002_Contig1657	Cluster-10.722	57.888	-1.959	0.89	-2.202	0.0277	0.118	SFU-3_S21_L002_30243_soapGraphK21,SFM-3_S12_L001_Contig1761,SFM-3_S12_L001_Contig1754,SFU-3_S21_L002_Contig1466,SFM-3_S12_L001_5196_soapGraphK61,SXC2_S4_L001_Contig1887,SFM-7_S13_L001_Contig1499,IFM27_S9_Contig325,IFM27_S9_Contig519,IFD8_S2_Contig1128,IFM047_S10_Contig233,SFC15-CM_S29_L002_Contig1657
IFM047_S10_4684_soapGraphK61	Cluster-10.994	12.433	-1.558	0.707	-2.203	0.0276	0.118	IFM047_S10_4684_soapGraphK61
IFM058_S13_2147_soapGraphK61,SFC-21_S22_L002_Contig2681	Cluster-10.1151	4.098	-1.746	0.789	-2.212	0.0269	0.118	IFM058_S13_2147_soapGraphK61,SFC-21_S22_L002_Contig2681
IFM060_S14_Contig303,SFC17_S7_L001_21781_soapGraphK31,IFM060_S14_Contig376,SFC17_S7_L001_Contig2001,IFC66_S31_L002_Contig1665,IFM047_S10_Contig664,IFD8_S2_Contig379,SFC17_S7_L001_Contig547,IFD8_S2_Contig393,SFC17_S7_L001_Contig984,SFC17_S7_L001_Contig542,SFC17_S7_L001_28246_soapGraphK21,SFC17_S7_L001_Contig982,SFC-023_S32_L002_Contig1160	Cluster-10.1174	80.588	-1.99	0.904	-2.202	0.0277	0.118	IFM060_S14_Contig303,SFC17_S7_L001_21781_soapGraphK31,IFM060_S14_Contig376,SFC17_S7_L001_Contig2001,IFC66_S31_L002_Contig1665,IFM047_S10_Contig664,IFD8_S2_Contig379,SFC17_S7_L001_Contig547,IFD8_S2_Contig393,SFC17_S7_L001_Contig984,SFC17_S7_L001_Contig542,SFC17_S7_L001_28246_soapGraphK21,SFC17_S7_L001_Contig982,SFC-023_S32_L002_Contig1160
SFC16_S6_L001_Contig1360	Cluster-10.139	2.559	-3.906	1.781	-2.193	0.0283	0.119	SFC16_S6_L001_Contig1360
IFM27_S9_Contig322,IFM047_S10_Contig1250,IFM27_S9_Contig565,SFM-7_S13_L001_Contig1072,IFM27_S9_Contig421,SFC17_S7_L001_Contig1711	Cluster-10.926	3.73	-4.16	1.896	-2.195	0.0282	0.119	IFM27_S9_Contig322,IFM047_S10_Contig1250,IFM27_S9_Contig565,SFM-7_S13_L001_Contig1072,IFM27_S9_Contig421,SFC17_S7_L001_Contig1711
SFM-10_S1_L001_Contig2532,SFC15-CM_S29_L002_Contig1047,IFC66_S31_L002_Contig1529	Cluster-267.0	1.958	-3.872	1.767	-2.191	0.0284	0.119	SFM-10_S1_L001_Contig2532,SFC15-CM_S29_L002_Contig1047,IFC66_S31_L002_Contig1529
SFC-21_S22_L002_33729_soapGraphK21,IFD6_S1_Contig576,IFM12_S16_Contig391,IFM12_S16_Contig389,SFC16_S6_L001_Contig1047,IFD6_S1_Contig571,IFM12_S16_Contig684,SFC22_S9_L001_Contig182,IFC66_S31_L002_Contig1293,SFC-21_S22_L002_Contig2692,IFD6_S1_Contig723,IFM12_S16_17039_soapGraphK41,IFM12_S16_Contig154,IFM047_S10_Contig1237,SFC14_S17_L001_Contig1213,SFC-21_S22_L002_Contig2482,IFM050_S11_Contig3653,SF…	Cluster-10.421	17.793	-1.821	0.836	-2.179	0.0293	0.121	SFC-21_S22_L002_33729_soapGraphK21,IFD6_S1_Contig576,IFM12_S16_Contig391,IFM12_S16_Contig389,SFC16_S6_L001_Contig1047,IFD6_S1_Contig571,IFM12_S16_Contig684,SFC22_S9_L001_Contig182,IFC66_S31_L002_Contig1293,SFC-21_S22_L002_Contig2692,IFD6_S1_Contig723,IFM12_S16_17039_soapGraphK41,IFM12_S16_Contig154,IFM047_S10_Contig1237,SFC14_S17_L001_Contig1213,SFC-21_S22_L002_Contig2482,IFM050_S11_Contig3653,SF…
IFM050_S11_Contig3788	Cluster-10.560	1.722	-5.098	2.336	-2.183	0.0291	0.121	IFM050_S11_Contig3788
SFM-7_S13_L001_Contig1529,SFC22_S9_L001_Contig1451	Cluster-10.712	3.203	2.322	1.066	2.178	0.0294	0.121	SFM-7_S13_L001_Contig1529,SFC22_S9_L001_Contig1451
IFD6_S1_Contig577,SFM-8_S8_L001_Contig2483,IFM57_S30_L002_Contig1707	Cluster-10.535	4.196	-4.581	2.112	-2.169	0.0301	0.122	IFD6_S1_Contig577,SFM-8_S8_L001_Contig2483,IFM57_S30_L002_Contig1707
SFC22_S9_L001_Contig3145	Cluster-10.924	2.208	4.924	2.269	2.171	0.03	0.122	SFC22_S9_L001_Contig3145
IFM050_S11_Contig2893	Cluster-10.33	0.882	-4.621	2.144	-2.156	0.0311	0.125	IFM050_S11_Contig2893
IFC66_S31_L002_Contig1585,SXC2_S4_L001_Contig1689,IFC66_S31_L002_5278_soapGraphK61	Cluster-10.282	1.444	-3.964	1.841	-2.154	0.0313	0.125	IFC66_S31_L002_Contig1585,SXC2_S4_L001_Contig1689,IFC66_S31_L002_5278_soapGraphK61
IFM047_S10_4460_soapGraphK61,IFM054_S12_Contig1076,IFM047_S10_Contig1448,SXC2_S4_L001_Contig1895	Cluster-10.356	2.082	-4.382	2.062	-2.126	0.0335	0.127	IFM047_S10_4460_soapGraphK61,IFM054_S12_Contig1076,IFM047_S10_Contig1448,SXC2_S4_L001_Contig1895
SFC22_S9_L001_Contig1629,IFM050_S11_Contig3777	Cluster-10.365	0.728	-4.525	2.135	-2.12	0.034	0.127	SFC22_S9_L001_Contig1629,IFM050_S11_Contig3777
IFM53_S14_L001_Contig2102	Cluster-10.376	1.054	-4.785	2.24	-2.136	0.0327	0.127	IFM53_S14_L001_Contig2102
IFM058_S13_Contig423	Cluster-10.497	1.244	-3.708	1.747	-2.122	0.0338	0.127	IFM058_S13_Contig423
SFM-8_S8_L001_Contig3574	Cluster-10.503	1.179	-3.971	1.856	-2.139	0.0324	0.127	SFM-8_S8_L001_Contig3574
SFM-10_S1_L001_Contig2564,IFM24_S5_Contig978,IFC63_S16_L001_Contig1848,IFM061_S15_Contig890	Cluster-10.539	4.718	-3.398	1.601	-2.122	0.0338	0.127	SFM-10_S1_L001_Contig2564,IFM24_S5_Contig978,IFC63_S16_L001_Contig1848,IFM061_S15_Contig890
IFM050_S11_Contig3573	Cluster-10.704	1.501	-3.985	1.876	-2.124	0.0336	0.127	IFM050_S11_Contig3573
IFM27_S9_1774_soapGraphK61,IFD8_S2_Contig1112,IFM27_S9_Contig520,IFM054_S12_Contig1093,IFD8_S2_Contig823,IFM047_S10_Contig1023	Cluster-10.749	5.243	-3.534	1.654	-2.137	0.0326	0.127	IFM27_S9_1774_soapGraphK61,IFD8_S2_Contig1112,IFM27_S9_Contig520,IFM054_S12_Contig1093,IFD8_S2_Contig823,IFM047_S10_Contig1023
SFM-1_S11_L001_Contig598	Cluster-10.825	0.846	-4.161	1.943	-2.142	0.0322	0.127	SFM-1_S11_L001_Contig598
IFD8_S2_Contig651,IFM054_S12_Contig743,IFD8_S2_Contig864	Cluster-10.902	1.394	-4.949	2.337	-2.118	0.0342	0.127	IFD8_S2_Contig651,IFM054_S12_Contig743,IFD8_S2_Contig864
SFC15-CM_S29_L002_Contig1050	Cluster-10.908	2.065	-2.044	0.96	-2.129	0.0332	0.127	SFC15-CM_S29_L002_Contig1050
SFM-7_S13_L001_Contig154,SFC17_S7_L001_28276_soapGraphK21,SFC17_S7_L001_Contig1014,SFM-7_S13_L001_Contig1897,SFC15-CM_S29_L002_Contig1080,SFM-1_S11_L001_Contig1198,IFM53_S14_L001_Contig1706	Cluster-10.913	21.26	3.262	1.521	2.144	0.032	0.127	SFM-7_S13_L001_Contig154,SFC17_S7_L001_28276_soapGraphK21,SFC17_S7_L001_Contig1014,SFM-7_S13_L001_Contig1897,SFC15-CM_S29_L002_Contig1080,SFM-1_S11_L001_Contig1198,IFM53_S14_L001_Contig1706
SFM-8_S8_L001_Contig1644,SFC22_S9_L001_Contig2722,SFM-5_S2_L001_Contig1932,SFM-8_S8_L001_Contig2899,SFM-8_S8_L001_10286_soapGraphK61,IFM058_S13_Contig1092,SFM-5_S2_L001_Contig2393,SFM-5_S2_L001_Contig2447,SFM-8_S8_L001_Contig3111,SFC22_S9_L001_Contig2837,SFC22_S9_L001_8840_soapGraphK61,IFM57_S30_L002_Contig1709,SFM-5_S2_L001_Contig1746,SFM-8_S8_L001_Contig3152,SFM-8_S8_L001_10408_soapGraphK61,SFM…	Cluster-10.1059	12.636	2.489	1.161	2.143	0.0321	0.127	SFM-8_S8_L001_Contig1644,SFC22_S9_L001_Contig2722,SFM-5_S2_L001_Contig1932,SFM-8_S8_L001_Contig2899,SFM-8_S8_L001_10286_soapGraphK61,IFM058_S13_Contig1092,SFM-5_S2_L001_Contig2393,SFM-5_S2_L001_Contig2447,SFM-8_S8_L001_Contig3111,SFC22_S9_L001_Contig2837,SFC22_S9_L001_8840_soapGraphK61,IFM57_S30_L002_Contig1709,SFM-5_S2_L001_Contig1746,SFM-8_S8_L001_Contig3152,SFM-8_S8_L001_10408_soapGraphK61,SFM…
IFM047_S10_4596_soapGraphK61,IFM24_S5_Contig819,IFM24_S5_Contig448,IFM054_S12_Contig888,IFM047_S10_Contig1439,IFM061_S15_Contig323,IFM24_S5_24196_soapGraphK21	Cluster-10.872	14.047	-2.938	1.392	-2.111	0.0348	0.128	IFM047_S10_4596_soapGraphK61,IFM24_S5_Contig819,IFM24_S5_Contig448,IFM054_S12_Contig888,IFM047_S10_Contig1439,IFM061_S15_Contig323,IFM24_S5_24196_soapGraphK21
SFC13_S23_L002_Contig2422,SFC17_S7_L001_Contig1724,SFC14_S17_L001_Contig2145,SFC17_S7_L001_Contig1720,IFM061_S15_Contig767,IFM26_S8_Contig447,IFM21_S3_Contig776,SFM-3_S12_L001_Contig934,IFM-049_S6_Contig39995,IFM24_S5_Contig916,IFM21_S3_Contig935,IFM-049_S6_Contig33584,IFM21_S3_7983_soapGraphK41	Cluster-10.993	19.666	-3.056	1.446	-2.114	0.0345	0.128	SFC13_S23_L002_Contig2422,SFC17_S7_L001_Contig1724,SFC14_S17_L001_Contig2145,SFC17_S7_L001_Contig1720,IFM061_S15_Contig767,IFM26_S8_Contig447,IFM21_S3_Contig776,SFM-3_S12_L001_Contig934,IFM-049_S6_Contig39995,IFM24_S5_Contig916,IFM21_S3_Contig935,IFM-049_S6_Contig33584,IFM21_S3_7983_soapGraphK41
SFM-7_S13_L001_Contig1889,SFM-7_S13_L001_5194_soapGraphK61,SFC-025_S33_L002_Contig1601	Cluster-10.933	31.67	-2.152	1.024	-2.102	0.0355	0.13	SFM-7_S13_L001_Contig1889,SFM-7_S13_L001_5194_soapGraphK61,SFC-025_S33_L002_Contig1601
IFM054_S12_Contig722,IFD8_S2_Contig430,IFM047_S10_Contig1027,IFM14_S7_Contig491	Cluster-10.551	11.497	-4.522	2.168	-2.086	0.037	0.134	IFM054_S12_Contig722,IFD8_S2_Contig430,IFM047_S10_Contig1027,IFM14_S7_Contig491
IFM047_S10_Contig1654,SFC22_S9_L001_Contig3180,IFM047_S10_Contig1632,IFD6_S1_Contig939,IFM054_S12_Contig1091,IFM047_S10_Contig1217,IFM57_S30_L002_Contig1295,IFM054_S12_Contig1083,SFC22_S9_L001_Contig3215,IFM047_S10_Contig1591,SFC22_S9_L001_Contig2843,SFC22_S9_L001_8750_soapGraphK61,SFM-8_S8_L001_Contig3590,SFC22_S9_L001_Contig3172,IFM047_S10_Contig1593,SFU-3_S21_L002_Contig1910,SFC14_S17_L001_Con…	Cluster-10.1032	49.003	-2.49	1.191	-2.09	0.0366	0.134	IFM047_S10_Contig1654,SFC22_S9_L001_Contig3180,IFM047_S10_Contig1632,IFD6_S1_Contig939,IFM054_S12_Contig1091,IFM047_S10_Contig1217,IFM57_S30_L002_Contig1295,IFM054_S12_Contig1083,SFC22_S9_L001_Contig3215,IFM047_S10_Contig1591,SFC22_S9_L001_Contig2843,SFC22_S9_L001_8750_soapGraphK61,SFM-8_S8_L001_Contig3590,SFC22_S9_L001_Contig3172,IFM047_S10_Contig1593,SFU-3_S21_L002_Contig1910,SFC14_S17_L001_Con…
IFC66_S31_L002_Contig1695	Cluster-10.1063	3.554	-2.336	1.122	-2.082	0.0373	0.135	IFC66_S31_L002_Contig1695
IFM054_S12_Contig1069	Cluster-10.133	0.924	-4.635	2.237	-2.072	0.0383	0.136	IFM054_S12_Contig1069
SFC15-CM_S29_L002_Contig1966	Cluster-10.304	1.295	-4.84	2.338	-2.07	0.0384	0.136	SFC15-CM_S29_L002_Contig1966
IFM050_S11_Contig2913,IFM050_S11_8248_soapGraphK61	Cluster-10.766	2.571	-2.108	1.015	-2.077	0.0378	0.136	IFM050_S11_Contig2913,IFM050_S11_8248_soapGraphK61
SFM-8_S8_L001_10334_soapGraphK61,SFM-8_S8_L001_Contig3138,IFM-049_S6_Contig3830	Cluster-10.950	1.076	-3.093	1.493	-2.072	0.0383	0.136	SFM-8_S8_L001_10334_soapGraphK61,SFM-8_S8_L001_Contig3138,IFM-049_S6_Contig3830
IFC66_S31_L002_25895_soapGraphK21,IFM050_S11_Contig2011	Cluster-10.335	3.377	-1.792	0.872	-2.055	0.0398	0.139	IFC66_S31_L002_25895_soapGraphK21,IFM050_S11_Contig2011
IFD8_S2_Contig688,IFM12_S16_Contig346,SXC2_S4_L001_Contig1404,IFD6_S1_Contig953,SFU2_S5_L001_Contig1874,SFC22_S9_L001_Contig3159,IFM12_S16_Contig834	Cluster-10.485	27.929	-1.355	0.659	-2.055	0.0399	0.139	IFD8_S2_Contig688,IFM12_S16_Contig346,SXC2_S4_L001_Contig1404,IFD6_S1_Contig953,SFU2_S5_L001_Contig1874,SFC22_S9_L001_Contig3159,IFM12_S16_Contig834
IFD8_S2_Contig989,IFC66_S31_L002_8043_soapGraphK51	Cluster-10.1181	4.522	-3.162	1.537	-2.057	0.0397	0.139	IFD8_S2_Contig989,IFC66_S31_L002_8043_soapGraphK51
IFC66_S31_L002_26151_soapGraphK21	Cluster-10.143	1.026	-4.158	2.028	-2.051	0.0403	0.14	IFC66_S31_L002_26151_soapGraphK21
SFC17_S7_L001_Contig333	Cluster-10.400	1.244	-4.788	2.338	-2.048	0.0406	0.14	SFC17_S7_L001_Contig333
SFC16_S6_L001_Contig541,IFM12_S16_Contig682,SFC16_S6_L001_Contig1364,IFM050_S11_Contig2293,IFM12_S16_3201_soapGraphK61,SFC17_S7_L001_Contig2006	Cluster-10.465	2.038	-3.173	1.551	-2.046	0.0408	0.14	SFC16_S6_L001_Contig541,IFM12_S16_Contig682,SFC16_S6_L001_Contig1364,IFM050_S11_Contig2293,IFM12_S16_3201_soapGraphK61,SFC17_S7_L001_Contig2006
IFM53_S14_L001_Contig2108,SFM-6_S3_L001_Contig2026,IFM53_S14_L001_Contig2123	Cluster-10.726	2.374	-2.931	1.438	-2.039	0.0415	0.142	IFM53_S14_L001_Contig2108,SFM-6_S3_L001_Contig2026,IFM53_S14_L001_Contig2123
IFM047_S10_Contig1641	Cluster-10.196	1.372	-3.946	1.94	-2.034	0.042	0.143	IFM047_S10_Contig1641
SFC17_S7_L001_Contig2012,SFM-3_S12_L001_Contig937,SFC13_S23_L002_Contig2154	Cluster-10.1070	13.763	-2.506	1.243	-2.016	0.0438	0.148	SFC17_S7_L001_Contig2012,SFM-3_S12_L001_Contig937,SFC13_S23_L002_Contig2154
SFM-7_S13_L001_Contig1082	Cluster-10.17	5.08	-1.736	0.87	-1.995	0.0461	0.154	SFM-7_S13_L001_Contig1082
IFM27_S9_Contig534,SFC15-CM_S29_L002_Contig1972,IFM56_S15_Contig1699,SFM-3_S12_L001_Contig1314,SFC13_S23_L002_Contig2712	Cluster-10.265	11.626	-3.233	1.623	-1.992	0.0464	0.154	IFM27_S9_Contig534,SFC15-CM_S29_L002_Contig1972,IFM56_S15_Contig1699,SFM-3_S12_L001_Contig1314,SFC13_S23_L002_Contig2712
IFM21_S3_Contig542	Cluster-130.0	0.934	-3.658	1.834	-1.995	0.0461	0.154	IFM21_S3_Contig542
IFD6_S1_Contig572	Cluster-10.511	3.84	-2.551	1.285	-1.985	0.0472	0.156	IFD6_S1_Contig572
IFC66_S31_L002_Contig1811,SFC-21_S22_L002_Contig1610	Cluster-10.670	30.741	-4.127	2.091	-1.974	0.0484	0.16	IFC66_S31_L002_Contig1811,SFC-21_S22_L002_Contig1610
IFM21_S3_Contig612,IFD6_S1_Contig941,IFC66_S31_L002_Contig1324	Cluster-10.435	3.7	-3.002	1.528	-1.964	0.0495	0.163	IFM21_S3_Contig612,IFD6_S1_Contig941,IFC66_S31_L002_Contig1324
SFU2_S5_L001_Contig1395,IFM054_S12_Contig906,IFM047_S10_Contig1645	Cluster-10.106	1.718	-4.401	2.259	-1.949	0.0513	0.164	SFU2_S5_L001_Contig1395,IFM054_S12_Contig906,IFM047_S10_Contig1645
IFM050_S11_Contig3752	Cluster-10.264	1.131	-3.104	1.588	-1.955	0.0506	0.164	IFM050_S11_Contig3752
IFM56_S15_Contig1233	Cluster-10.324	3.405	-3.361	1.718	-1.957	0.0504	0.164	IFM56_S15_Contig1233
SFM-3_S12_L001_Contig1765,SFC13_S23_L002_Contig1612,SFC13_S23_L002_Contig2432	Cluster-10.394	2.011	3.391	1.739	1.951	0.0511	0.164	SFM-3_S12_L001_Contig1765,SFC13_S23_L002_Contig1612,SFC13_S23_L002_Contig2432
SFM-6_S3_L001_Contig2025,IFM53_S14_L001_Contig2097,IFM57_S30_L002_Contig1718	Cluster-10.611	2.311	-3.856	1.977	-1.95	0.0511	0.164	SFM-6_S3_L001_Contig2025,IFM53_S14_L001_Contig2097,IFM57_S30_L002_Contig1718
SFC-023_S32_L002_Contig778	Cluster-10.729	0.83	-3.935	2.02	-1.949	0.0513	0.164	SFC-023_S32_L002_Contig778
SFU2_S5_L001_Contig1092,IFM047_S10_Contig1229	Cluster-10.103	1.508	-4.393	2.261	-1.943	0.0521	0.165	SFU2_S5_L001_Contig1092,IFM047_S10_Contig1229
SFM-1_S11_L001_Contig1615	Cluster-10.463	3.382	3.615	1.863	1.94	0.0523	0.165	SFM-1_S11_L001_Contig1615
SFU2_S5_L001_Contig760	Cluster-10.334	0.827	-3.334	1.734	-1.922	0.0546	0.17	SFU2_S5_L001_Contig760
IFM27_S9_Contig625,IFM054_S12_Contig1099,IFM047_S10_Contig1475,IFD8_S2_Contig1049,IFM047_S10_Contig1661,IFM054_S12_Contig1095	Cluster-10.622	21.275	-3.726	1.933	-1.927	0.0539	0.17	IFM27_S9_Contig625,IFM054_S12_Contig1099,IFM047_S10_Contig1475,IFD8_S2_Contig1049,IFM047_S10_Contig1661,IFM054_S12_Contig1095
IFC66_S31_L002_5088_soapGraphK61,IFM058_S13_Contig669,IFC66_S31_L002_Contig1569,IFC66_S31_L002_Contig1771,SFC17_S7_L001_Contig1415,SFC13_S23_L002_Contig1794,IFC66_S31_L002_Contig1817,IFM050_S11_8386_soapGraphK61,IFM050_S11_Contig2846,IFM050_S11_Contig2290,IFM050_S11_Contig3365,IFC66_S31_L002_26199_soapGraphK21,IFC66_S31_L002_Contig1003,IFM058_S13_Contig166,SFC13_S23_L002_Contig1466	Cluster-10.1154	23.449	-1.454	0.755	-1.925	0.0542	0.17	IFC66_S31_L002_5088_soapGraphK61,IFM058_S13_Contig669,IFC66_S31_L002_Contig1569,IFC66_S31_L002_Contig1771,SFC17_S7_L001_Contig1415,SFC13_S23_L002_Contig1794,IFC66_S31_L002_Contig1817,IFM050_S11_8386_soapGraphK61,IFM050_S11_Contig2846,IFM050_S11_Contig2290,IFM050_S11_Contig3365,IFC66_S31_L002_26199_soapGraphK21,IFC66_S31_L002_Contig1003,IFM058_S13_Contig166,SFC13_S23_L002_Contig1466
IFM12_S16_Contig63,SFC-21_S22_L002_Contig2013,IFM27_S9_Contig367	Cluster-10.141	2.114	-3.947	2.071	-1.906	0.0567	0.175	IFM12_S16_Contig63,SFC-21_S22_L002_Contig2013,IFM27_S9_Contig367
SFU2_S5_L001_Contig1868,IFC63_S16_L001_Contig1217,SFM-8_S8_L001_Contig2490,IFM27_S9_Contig201,IFC66_S31_L002_8505_soapGraphK51,IFC66_S31_L002_Contig982,IFM27_S9_Contig319,IFM21_S3_Contig804,SFM-8_S8_L001_Contig1563,SFU2_S5_L001_Contig1460,IFM21_S3_Contig330,IFC66_S31_L002_Contig1847,IFM061_S15_Contig571	Cluster-10.237	12.064	-2.529	1.327	-1.905	0.0567	0.175	SFU2_S5_L001_Contig1868,IFC63_S16_L001_Contig1217,SFM-8_S8_L001_Contig2490,IFM27_S9_Contig201,IFC66_S31_L002_8505_soapGraphK51,IFC66_S31_L002_Contig982,IFM27_S9_Contig319,IFM21_S3_Contig804,SFM-8_S8_L001_Contig1563,SFU2_S5_L001_Contig1460,IFM21_S3_Contig330,IFC66_S31_L002_Contig1847,IFM061_S15_Contig571
SFC-18_S20_L002_Contig1729	Cluster-10.236	1.585	-2.842	1.497	-1.899	0.0575	0.176	SFC-18_S20_L002_Contig1729
IFM24_S5_Contig695,IFC63_S16_L001_Contig1243,IFM061_S15_Contig578,SFM-10_S1_L001_Contig2269,SFU2_S5_L001_Contig1894,IFC63_S16_L001_4982_soapGraphK61,IFC63_S16_L001_25452_soapGraphK21,IFM-049_S6_Contig32558	Cluster-10.1074	18.254	-2.067	1.088	-1.9	0.0574	0.176	IFM24_S5_Contig695,IFC63_S16_L001_Contig1243,IFM061_S15_Contig578,SFM-10_S1_L001_Contig2269,SFU2_S5_L001_Contig1894,IFC63_S16_L001_4982_soapGraphK61,IFC63_S16_L001_25452_soapGraphK21,IFM-049_S6_Contig32558
IFM26_S8_Contig122,IFM058_S13_Contig849	Cluster-10.576	1.604	-4.111	2.172	-1.893	0.0583	0.178	IFM26_S8_Contig122,IFM058_S13_Contig849
SFM-1_S11_L001_Contig2084,IFM058_S13_Contig1102,IFM-049_S6_Contig40371,SFM-1_S11_L001_Contig2076,IFM-049_S6_Contig40614	Cluster-10.886	3.902	-2.812	1.495	-1.881	0.0599	0.18	SFM-1_S11_L001_Contig2084,IFM058_S13_Contig1102,IFM-049_S6_Contig40371,SFM-1_S11_L001_Contig2076,IFM-049_S6_Contig40614
IFM054_S12_Contig236	Cluster-10.980	1.498	-3.338	1.771	-1.885	0.0595	0.18	IFM054_S12_Contig236
SFC15-CM_S29_L002_Contig1068,IFM21_S3_Contig382,SFC15-CM_S29_L002_Contig1446	Cluster-10.1022	1.094	4.239	2.25	1.884	0.0596	0.18	SFC15-CM_S29_L002_Contig1068,IFM21_S3_Contig382,SFC15-CM_S29_L002_Contig1446
IFM27_S9_12836_soapGraphK31,IFM27_S9_Contig617	Cluster-10.326	4.223	-4.126	2.204	-1.872	0.0612	0.182	IFM27_S9_12836_soapGraphK31,IFM27_S9_Contig617
SFM-8_S8_L001_Contig3379	Cluster-10.791	0.948	-4.04	2.156	-1.873	0.061	0.182	SFM-8_S8_L001_Contig3379
SFC22_S9_L001_Contig2333,IFM060_S14_Contig284,SFC17_S7_L001_Contig552,IFD8_S2_Contig415,SFC17_S7_L001_Contig1008,IFM054_S12_Contig557,SFU2_S5_L001_Contig1867,IFM060_S14_Contig239	Cluster-10.790	60.433	-1.681	0.9	-1.867	0.0618	0.184	SFC22_S9_L001_Contig2333,IFM060_S14_Contig284,SFC17_S7_L001_Contig552,IFD8_S2_Contig415,SFC17_S7_L001_Contig1008,IFM054_S12_Contig557,SFU2_S5_L001_Contig1867,IFM060_S14_Contig239
SFC17_S7_L001_Contig2007	Cluster-10.273	0.786	3.998	2.146	1.863	0.0624	0.185	SFC17_S7_L001_Contig2007
SFC-21_S22_L002_Contig2157,SFC17_S7_L001_Contig2014,SFC-21_S22_L002_Contig2469	Cluster-10.675	1.608	3.843	2.068	1.858	0.0631	0.185	SFC-21_S22_L002_Contig2157,SFC17_S7_L001_Contig2014,SFC-21_S22_L002_Contig2469
IFM21_S3_Contig576,SFC17_S7_L001_Contig969,IFM27_S9_Contig316,IFM047_S10_Contig583,SFM-8_S8_L001_Contig2837,SFC22_S9_L001_Contig3174,SFU2_S5_L001_Contig578,IFM21_S3_Contig619,IFM050_S11_8066_soapGraphK61,IFM050_S11_Contig3337,SFC22_S9_L001_Contig3171,SFM-8_S8_L001_Contig3529	Cluster-10.764	12.821	-1.619	0.873	-1.855	0.0636	0.185	IFM21_S3_Contig576,SFC17_S7_L001_Contig969,IFM27_S9_Contig316,IFM047_S10_Contig583,SFM-8_S8_L001_Contig2837,SFC22_S9_L001_Contig3174,SFU2_S5_L001_Contig578,IFM21_S3_Contig619,IFM050_S11_8066_soapGraphK61,IFM050_S11_Contig3337,SFC22_S9_L001_Contig3171,SFM-8_S8_L001_Contig3529
IFM23_S4_Contig636	Cluster-26.0	0.838	-4.355	2.343	-1.859	0.063	0.185	IFM23_S4_Contig636
SFC15-CM_S29_L002_Contig1070,SFM-1_S11_L001_Contig1875,IFM058_S13_Contig884,IFM21_S3_Contig594,IFM26_S8_Contig193,IFM047_S10_Contig677,IFM050_S11_Contig1146,IFM57_S30_L002_Contig1000,IFM058_S13_Contig661,IFM57_S30_L002_Contig636,IFM054_S12_Contig428,SFC22_S9_L001_Contig3124,SFC22_S9_L001_Contig2387,SFM-1_S11_L001_Contig759,IFM054_S12_Contig1080,SFC-18_S20_L002_Contig1709,IFM054_S12_Contig565,SFC-…	Cluster-314.0	45.466	-1.213	0.654	-1.857	0.0634	0.185	SFC15-CM_S29_L002_Contig1070,SFM-1_S11_L001_Contig1875,IFM058_S13_Contig884,IFM21_S3_Contig594,IFM26_S8_Contig193,IFM047_S10_Contig677,IFM050_S11_Contig1146,IFM57_S30_L002_Contig1000,IFM058_S13_Contig661,IFM57_S30_L002_Contig636,IFM054_S12_Contig428,SFC22_S9_L001_Contig3124,SFC22_S9_L001_Contig2387,SFM-1_S11_L001_Contig759,IFM054_S12_Contig1080,SFC-18_S20_L002_Contig1709,IFM054_S12_Contig565,SFC-…
SFC-18_S20_L002_Contig1437,IFM57_S30_L002_Contig1682,SFC22_S9_L001_Contig2818,IFM57_S30_L002_Contig403,SFC22_S9_L001_8816_soapGraphK61,IFM57_S30_L002_Contig345	Cluster-10.337	0.763	3.978	2.153	1.847	0.0647	0.186	SFC-18_S20_L002_Contig1437,IFM57_S30_L002_Contig1682,SFC22_S9_L001_Contig2818,IFM57_S30_L002_Contig403,SFC22_S9_L001_8816_soapGraphK61,IFM57_S30_L002_Contig345
IFM57_S30_L002_Contig1708	Cluster-10.417	0.978	3.796	2.054	1.848	0.0646	0.186	IFM57_S30_L002_Contig1708
IFM12_S16_Contig240,SFM-1_S11_L001_Contig2096,IFM-049_S6_426825_soapGraphK21,IFM047_S10_Contig1254,IFD8_S2_Contig97,IFM53_S14_L001_Contig1682,IFM53_S14_L001_Contig1675,IFM21_S3_Contig610,SFC19_S24_L002_Contig2083,SFU2_S5_L001_Contig1897,IFM53_S14_L001_Contig567,IFM53_S14_L001_Contig836,SFU-3_S21_L002_Contig2031,IFD8_S2_Contig1048,SFM-10_S1_L001_Contig2548,SFC15-CM_S29_L002_Contig1981,IFD8_S2_Cont…	Cluster-10.1175	264.911	-1.298	0.702	-1.85	0.0644	0.186	IFM12_S16_Contig240,SFM-1_S11_L001_Contig2096,IFM-049_S6_426825_soapGraphK21,IFM047_S10_Contig1254,IFD8_S2_Contig97,IFM53_S14_L001_Contig1682,IFM53_S14_L001_Contig1675,IFM21_S3_Contig610,SFC19_S24_L002_Contig2083,SFU2_S5_L001_Contig1897,IFM53_S14_L001_Contig567,IFM53_S14_L001_Contig836,SFU-3_S21_L002_Contig2031,IFD8_S2_Contig1048,SFM-10_S1_L001_Contig2548,SFC15-CM_S29_L002_Contig1981,IFD8_S2_Cont…
IFM26_S8_Contig649	Cluster-10.246	35.332	-2.698	1.476	-1.829	0.0675	0.191	IFM26_S8_Contig649
SFC14_S17_L001_Contig1232,SFC13_S23_L002_Contig1212,SFU-3_S21_L002_Contig584	Cluster-10.962	0.785	3.36	1.837	1.829	0.0673	0.191	SFC14_S17_L001_Contig1232,SFC13_S23_L002_Contig1212,SFU-3_S21_L002_Contig584
SFC13_S23_L002_Contig1755,IFM27_S9_Contig602,SFM-1_S11_L001_Contig652,SFC13_S23_L002_Contig4,IFC66_S31_L002_Contig1000,IFM047_S10_Contig972,IFM047_S10_Contig1024,IFM27_S9_Contig302,SFC-18_S20_L002_Contig654,IFD8_S2_Contig334,IFM054_S12_Contig1097,IFM047_S10_Contig1446,IFM047_S10_4628_soapGraphK61,IFM27_S9_3245_soapGraphK51,IFM27_S9_Contig309	Cluster-10.981	18.558	-1.491	0.814	-1.833	0.0668	0.191	SFC13_S23_L002_Contig1755,IFM27_S9_Contig602,SFM-1_S11_L001_Contig652,SFC13_S23_L002_Contig4,IFC66_S31_L002_Contig1000,IFM047_S10_Contig972,IFM047_S10_Contig1024,IFM27_S9_Contig302,SFC-18_S20_L002_Contig654,IFD8_S2_Contig334,IFM054_S12_Contig1097,IFM047_S10_Contig1446,IFM047_S10_4628_soapGraphK61,IFM27_S9_3245_soapGraphK51,IFM27_S9_Contig309
IFC66_S31_L002_Contig1779	Cluster-325.0	0.743	-4.279	2.343	-1.826	0.0679	0.192	IFC66_S31_L002_Contig1779
SFC22_S9_L001_Contig3212	Cluster-10.159	1.965	-1.755	0.965	-1.82	0.0688	0.193	SFC22_S9_L001_Contig3212
IFM21_S3_Contig349,IFM050_S11_Contig2013	Cluster-10.369	1.006	-2.19	1.206	-1.816	0.0693	0.194	IFM21_S3_Contig349,IFM050_S11_Contig2013
SFU2_S5_L001_Contig1419,IFM054_S12_Contig710,IFM047_S10_Contig1242	Cluster-10.107	2.038	-3.936	2.179	-1.807	0.0708	0.196	SFU2_S5_L001_Contig1419,IFM054_S12_Contig710,IFM047_S10_Contig1242
SFM-6_S3_L001_Contig2024,IFD8_S2_Contig1122,IFM047_S10_Contig1635,IFM054_S12_Contig1092,IFM047_S10_Contig977	Cluster-10.577	1.845	-3.249	1.795	-1.81	0.0702	0.196	SFM-6_S3_L001_Contig2024,IFD8_S2_Contig1122,IFM047_S10_Contig1635,IFM054_S12_Contig1092,IFM047_S10_Contig977
SFC16_S6_L001_Contig1795,IFC66_S31_L002_Contig1443,SFC-21_S22_L002_Contig1393,IFD6_S1_Contig547,SFC16_S6_L001_Contig1788,IFD6_S1_Contig538,SFC17_S7_L001_Contig1354,IFM14_S7_Contig295,SFC-21_S22_L002_Contig2454,SFC17_S7_L001_5503_soapGraphK61,SFC17_S7_L001_Contig1746,SFC-21_S22_L002_Contig2689,SFC17_S7_L001_Contig1695,SFC16_S6_L001_Contig1036,IFD6_S1_Contig707,SFC-21_S22_L002_Contig2133,IFC66_S31_…	Cluster-10.857	72.598	-3.818	2.112	-1.808	0.0706	0.196	SFC16_S6_L001_Contig1795,IFC66_S31_L002_Contig1443,SFC-21_S22_L002_Contig1393,IFD6_S1_Contig547,SFC16_S6_L001_Contig1788,IFD6_S1_Contig538,SFC17_S7_L001_Contig1354,IFM14_S7_Contig295,SFC-21_S22_L002_Contig2454,SFC17_S7_L001_5503_soapGraphK61,SFC17_S7_L001_Contig1746,SFC-21_S22_L002_Contig2689,SFC17_S7_L001_Contig1695,SFC16_S6_L001_Contig1036,IFD6_S1_Contig707,SFC-21_S22_L002_Contig2133,IFC66_S31_…
SFM-3_S12_L001_Contig1990,SFC13_S23_L002_Contig2424	Cluster-10.1031	0.769	3.881	2.152	1.804	0.0713	0.196	SFM-3_S12_L001_Contig1990,SFC13_S23_L002_Contig2424
SFU-3_S21_L002_Contig1773,IFM054_S12_Contig669,IFM047_S10_4524_soapGraphK61,SFU-3_S21_L002_5551_soapGraphK61	Cluster-10.445	1.009	-3.701	2.057	-1.799	0.072	0.197	SFU-3_S21_L002_Contig1773,IFM054_S12_Contig669,IFM047_S10_4524_soapGraphK61,SFU-3_S21_L002_5551_soapGraphK61
IFM058_S13_Contig1004,SFC13_S23_L002_Contig2711,SFM-3_S12_L001_Contig1975	Cluster-10.836	0.92	4.045	2.257	1.792	0.0731	0.197	IFM058_S13_Contig1004,SFC13_S23_L002_Contig2711,SFM-3_S12_L001_Contig1975
SFC17_S7_L001_Contig1972,SFC14_S17_L001_Contig2167,SFU-3_S21_L002_Contig1457	Cluster-10.846	6.291	2.899	1.611	1.8	0.0719	0.197	SFC17_S7_L001_Contig1972,SFC14_S17_L001_Contig2167,SFU-3_S21_L002_Contig1457
IFM24_S5_Contig985,IFC63_S16_L001_Contig1917,IFM21_S3_Contig988,SXC2_S4_L001_Contig1397,IFM21_S3_Contig616	Cluster-10.893	10.525	-2.413	1.346	-1.792	0.0731	0.197	IFM24_S5_Contig985,IFC63_S16_L001_Contig1917,IFM21_S3_Contig988,SXC2_S4_L001_Contig1397,IFM21_S3_Contig616
SFC15-CM_S29_L002_Contig1062,SFM-10_S1_L001_Contig2246,SFC15-CM_S29_L002_Contig1964,IFM21_S3_Contig618,SFC15-CM_S29_L002_Contig1947,SFC15-CM_S29_L002_Contig1959,SFM-10_S1_L001_Contig2580,SFC15-CM_S29_L002_Contig1737,SFC15-CM_S29_L002_4725_soapGraphK61	Cluster-10.928	74.508	-2.722	1.518	-1.793	0.073	0.197	SFC15-CM_S29_L002_Contig1062,SFM-10_S1_L001_Contig2246,SFC15-CM_S29_L002_Contig1964,IFM21_S3_Contig618,SFC15-CM_S29_L002_Contig1947,SFC15-CM_S29_L002_Contig1959,SFM-10_S1_L001_Contig2580,SFC15-CM_S29_L002_Contig1737,SFC15-CM_S29_L002_4725_soapGraphK61
IFM058_S13_Contig1101	Cluster-10.853	14.586	2.423	1.354	1.789	0.0736	0.198	IFM058_S13_Contig1101
SFU2_S5_L001_Contig1455,SFC13_S23_L002_Contig2738,IFM24_S5_Contig810,IFC63_S16_L001_Contig2077,SFM-1_S11_L001_Contig2094,IFM061_S15_Contig967,SFM-6_S3_L001_Contig631,SFU2_S5_L001_Contig1706,SFC19_S24_L002_Contig1569,SFM-1_S11_L001_Contig2077,SFC13_S23_L002_Contig1795,IFM24_S5_Contig689,IFM24_S5_Contig770,IFC63_S16_L001_Contig2044,SFM-3_S12_L001_Contig2006,IFC63_S16_L001_Contig1645,IFM061_S15_Cont…	Cluster-10.940	49.921	2.079	1.166	1.783	0.0746	0.198	SFU2_S5_L001_Contig1455,SFC13_S23_L002_Contig2738,IFM24_S5_Contig810,IFC63_S16_L001_Contig2077,SFM-1_S11_L001_Contig2094,IFM061_S15_Contig967,SFM-6_S3_L001_Contig631,SFU2_S5_L001_Contig1706,SFC19_S24_L002_Contig1569,SFM-1_S11_L001_Contig2077,SFC13_S23_L002_Contig1795,IFM24_S5_Contig689,IFM24_S5_Contig770,IFC63_S16_L001_Contig2044,SFM-3_S12_L001_Contig2006,IFC63_S16_L001_Contig1645,IFM061_S15_Cont…
SFC-023_S32_L002_Contig807	Cluster-10.1099	1.658	2.081	1.166	1.784	0.0744	0.198	SFC-023_S32_L002_Contig807
SFC19_S24_L002_Contig2074,SFM-3_S12_L001_Contig1997,SFC19_S24_L002_Contig1149,SXC2_S4_L001_Contig1885,SFC13_S23_L002_Contig2468,IFM050_S11_Contig3796,SFM-10_S1_L001_7131_soapGraphK61,IFM061_S15_Contig1000,IFC66_S31_L002_Contig1856	Cluster-10.1118	183.919	-1.237	0.693	-1.786	0.0741	0.198	SFC19_S24_L002_Contig2074,SFM-3_S12_L001_Contig1997,SFC19_S24_L002_Contig1149,SXC2_S4_L001_Contig1885,SFC13_S23_L002_Contig2468,IFM050_S11_Contig3796,SFM-10_S1_L001_7131_soapGraphK61,IFM061_S15_Contig1000,IFC66_S31_L002_Contig1856
IFM-049_S6_Contig41147	Cluster-10.1152	1.5	-3.028	1.7	-1.781	0.0748	0.198	IFM-049_S6_Contig41147
SFM-1_S11_L001_Contig2064	Cluster-10.987	2.414	-2.249	1.269	-1.772	0.0763	0.201	SFM-1_S11_L001_Contig2064
IFM56_S15_Contig1776	Cluster-10.172	0.765	-4.131	2.345	-1.761	0.0782	0.203	IFM56_S15_Contig1776
SFM-6_S3_L001_Contig2022,IFM12_S16_Contig676	Cluster-10.524	0.765	-4.131	2.345	-1.761	0.0782	0.203	SFM-6_S3_L001_Contig2022,IFM12_S16_Contig676
IFM-049_S6_Contig40447	Cluster-10.592	0.654	-4.145	2.345	-1.767	0.0772	0.203	IFM-049_S6_Contig40447
SFM-8_S8_L001_Contig763	Cluster-10.605	1.865	-2.273	1.289	-1.764	0.0778	0.203	SFM-8_S8_L001_Contig763
SFM-3_S12_L001_Contig1978	Cluster-10.293	0.658	3.713	2.147	1.73	0.0837	0.217	SFM-3_S12_L001_Contig1978
IFD6_S1_Contig554	Cluster-10.173	2.157	-2.819	1.65	-1.709	0.0875	0.219	IFD6_S1_Contig554
IFC66_S31_L002_Contig594	Cluster-10.361	1.949	-1.525	0.891	-1.712	0.0869	0.219	IFC66_S31_L002_Contig594
IFM27_S9_Contig187,IFM050_S11_Contig3436,IFM050_S11_8320_soapGraphK61,IFM27_S9_Contig472	Cluster-10.532	1.172	-2.732	1.599	-1.709	0.0874	0.219	IFM27_S9_Contig187,IFM050_S11_Contig3436,IFM050_S11_8320_soapGraphK61,IFM27_S9_Contig472
IFM047_S10_Contig1235,IFM050_S11_Contig3442,SFC13_S23_L002_Contig1748,SFC22_S9_L001_Contig854,IFC66_S31_L002_Contig1171,IFM050_S11_Contig3691,IFM050_S11_Contig3430,IFM050_S11_8298_soapGraphK61	Cluster-10.627	19.272	-1.32	0.766	-1.723	0.085	0.219	IFM047_S10_Contig1235,IFM050_S11_Contig3442,SFC13_S23_L002_Contig1748,SFC22_S9_L001_Contig854,IFC66_S31_L002_Contig1171,IFM050_S11_Contig3691,IFM050_S11_Contig3430,IFM050_S11_8298_soapGraphK61
IFD8_S2_Contig1106	Cluster-10.716	11.202	-2.381	1.385	-1.719	0.0855	0.219	IFD8_S2_Contig1106
IFM21_S3_Contig801	Cluster-10.851	1.491	-2.614	1.53	-1.708	0.0876	0.219	IFM21_S3_Contig801
IFM047_S10_Contig1381,SFM-1_S11_L001_Contig2078,IFM054_S12_Contig729,IFM047_S10_Contig1440,IFM061_S15_Contig893	Cluster-10.877	8.843	-2.245	1.308	-1.717	0.086	0.219	IFM047_S10_Contig1381,SFM-1_S11_L001_Contig2078,IFM054_S12_Contig729,IFM047_S10_Contig1440,IFM061_S15_Contig893
SFM-10_S1_L001_7183_soapGraphK61,SFM-10_S1_L001_Contig2270,SFU2_S5_L001_Contig1718,SFU2_S5_L001_Contig1713,IFC63_S16_L001_Contig1120,SFU2_S5_L001_4656_soapGraphK61,SFM-6_S3_L001_Contig1468,SFM-6_S3_L001_5453_soapGraphK61,SFU2_S5_L001_4626_soapGraphK61,IFM24_S5_Contig981,IFM061_S15_Contig481,SFM-10_S1_L001_Contig1670,SFM-10_S1_L001_7197_soapGraphK61,SFU2_S5_L001_4708_soapGraphK61,IFC63_S16_L001_Co…	Cluster-10.909	17.344	-2.501	1.456	-1.717	0.0859	0.219	SFM-10_S1_L001_7183_soapGraphK61,SFM-10_S1_L001_Contig2270,SFU2_S5_L001_Contig1718,SFU2_S5_L001_Contig1713,IFC63_S16_L001_Contig1120,SFU2_S5_L001_4656_soapGraphK61,SFM-6_S3_L001_Contig1468,SFM-6_S3_L001_5453_soapGraphK61,SFU2_S5_L001_4626_soapGraphK61,IFM24_S5_Contig981,IFM061_S15_Contig481,SFM-10_S1_L001_Contig1670,SFM-10_S1_L001_7197_soapGraphK61,SFU2_S5_L001_4708_soapGraphK61,IFC63_S16_L001_Co…
IFD8_S2_Contig957,IFM23_S4_Contig235	Cluster-10.1084	39.4	-2.641	1.542	-1.713	0.0868	0.219	IFD8_S2_Contig957,IFM23_S4_Contig235
IFM047_S10_Contig1630,SFC22_S9_L001_Contig2810	Cluster-10.1145	8.099	-1.623	0.947	-1.713	0.0866	0.219	IFM047_S10_Contig1630,SFC22_S9_L001_Contig2810
IFC66_S31_L002_8427_soapGraphK51	Cluster-10.612	94.714	-1.402	0.824	-1.701	0.0889	0.221	IFC66_S31_L002_8427_soapGraphK51
IFM26_S8_Contig377	Cluster-10.1071	3.67	-2.534	1.493	-1.698	0.0896	0.222	IFM26_S8_Contig377
SFC17_S7_L001_Contig1433,SFM-1_S11_L001_Contig2091,IFM23_S4_Contig285,IFM23_S4_Contig244,IFM23_S4_Contig117,IFM23_S4_Contig644,IFM23_S4_Contig482,SFU2_S5_L001_Contig18	Cluster-10.1066	2.288	3.381	2.001	1.69	0.0911	0.224	SFC17_S7_L001_Contig1433,SFM-1_S11_L001_Contig2091,IFM23_S4_Contig285,IFM23_S4_Contig244,IFM23_S4_Contig117,IFM23_S4_Contig644,IFM23_S4_Contig482,SFU2_S5_L001_Contig18
SFC22_S9_L001_Contig3204,IFM57_S30_L002_Contig859	Cluster-10.1110	1.753	-2.312	1.367	-1.692	0.0907	0.224	SFC22_S9_L001_Contig3204,IFM57_S30_L002_Contig859
IFM21_S3_Contig943	Cluster-10.1095	2.847	-2.453	1.457	-1.684	0.0922	0.226	IFM21_S3_Contig943
SFU2_S5_L001_25621_soapGraphK21,IFM047_S10_Contig1518,SFM-7_S13_L001_Contig1880,SFM-5_S2_L001_Contig697,IFM058_S13_Contig886,IFM12_S16_Contig525,SFM-6_S3_L001_Contig478,IFM058_S13_Contig670,SFM-10_S1_L001_Contig263,SFM-10_S1_L001_Contig2261,IFM21_S3_Contig362,IFM058_S13_Contig1036,SFC-18_S20_L002_Contig628,IFM26_S8_Contig186,SFM-6_S3_L001_Contig1960,IFM12_S16_Contig830,SFM-6_S3_L001_27379_soapGra…	Cluster-10.5	112.131	-1.102	0.658	-1.674	0.0941	0.228	SFU2_S5_L001_25621_soapGraphK21,IFM047_S10_Contig1518,SFM-7_S13_L001_Contig1880,SFM-5_S2_L001_Contig697,IFM058_S13_Contig886,IFM12_S16_Contig525,SFM-6_S3_L001_Contig478,IFM058_S13_Contig670,SFM-10_S1_L001_Contig263,SFM-10_S1_L001_Contig2261,IFM21_S3_Contig362,IFM058_S13_Contig1036,SFC-18_S20_L002_Contig628,IFM26_S8_Contig186,SFM-6_S3_L001_Contig1960,IFM12_S16_Contig830,SFM-6_S3_L001_27379_soapGra…
IFM12_S16_Contig226	Cluster-10.23	0.818	-3.785	2.266	-1.67	0.0949	0.228	IFM12_S16_Contig226
IFM26_S8_Contig487	Cluster-10.197	1.095	-3.255	1.94	-1.677	0.0935	0.228	IFM26_S8_Contig487
IFM23_S4_Contig38	Cluster-10.307	2.462	-3.056	1.823	-1.676	0.0937	0.228	IFM23_S4_Contig38
IFM12_S16_Contig507,SFM-8_S8_L001_Contig3515,SFU2_S5_L001_Contig1111	Cluster-10.379	1.877	-1.76	1.053	-1.672	0.0946	0.228	IFM12_S16_Contig507,SFM-8_S8_L001_Contig3515,SFU2_S5_L001_Contig1111
IFC66_S31_L002_Contig1843	Cluster-10.480	0.8	-2.761	1.653	-1.67	0.0949	0.228	IFC66_S31_L002_Contig1843
SFM-3_S12_L001_Contig1471,SFC13_S23_L002_Contig1181,SFC13_S23_L002_Contig1270	Cluster-10.174	2.351	3.206	1.929	1.663	0.0964	0.229	SFM-3_S12_L001_Contig1471,SFC13_S23_L002_Contig1181,SFC13_S23_L002_Contig1270
IFM53_S14_L001_Contig2476,IFC63_S16_L001_Contig1624	Cluster-10.948	21.075	-1.41	0.848	-1.664	0.0962	0.229	IFM53_S14_L001_Contig2476,IFC63_S16_L001_Contig1624
SFM-3_S12_L001_Contig1985,SFC13_S23_L002_Contig608,IFM-049_S6_Contig39076	Cluster-307.0	0.877	3.882	2.332	1.665	0.096	0.229	SFM-3_S12_L001_Contig1985,SFC13_S23_L002_Contig608,IFM-049_S6_Contig39076
IFD8_S2_Contig758,SFC16_S6_L001_Contig1015,IFM26_S8_Contig619,IFM047_S10_Contig1616,SXC2_S4_L001_Contig1002,IFM047_S10_Contig1631,IFM054_S12_Contig59,IFM21_S3_Contig1059,IFM23_S4_Contig224,IFM26_S8_Contig2,IFD8_S2_Contig325,SFM-10_S1_L001_Contig1348,SXC2_S4_L001_Contig1902,SFM-10_S1_L001_Contig1564,IFM047_S10_Contig1644,IFM23_S4_Contig485,SFM-10_S1_L001_19110_soapGraphK41,SFM-10_S1_L001_11468_soa…	Cluster-10.894	46.832	-2.594	1.568	-1.654	0.0981	0.232	IFD8_S2_Contig758,SFC16_S6_L001_Contig1015,IFM26_S8_Contig619,IFM047_S10_Contig1616,SXC2_S4_L001_Contig1002,IFM047_S10_Contig1631,IFM054_S12_Contig59,IFM21_S3_Contig1059,IFM23_S4_Contig224,IFM26_S8_Contig2,IFD8_S2_Contig325,SFM-10_S1_L001_Contig1348,SXC2_S4_L001_Contig1902,SFM-10_S1_L001_Contig1564,IFM047_S10_Contig1644,IFM23_S4_Contig485,SFM-10_S1_L001_19110_soapGraphK41,SFM-10_S1_L001_11468_soa…
IFM12_S16_Contig543	Cluster-10.305	4.283	-3.658	2.218	-1.649	0.099	0.233	IFM12_S16_Contig543
SFU2_S5_L001_Contig1858	Cluster-10.587	4.268	-2.805	1.708	-1.642	0.101	0.235	SFU2_S5_L001_Contig1858
SFC-023_S32_L002_Contig575,SFU2_S5_L001_Contig718,IFC66_S31_L002_Contig1788	Cluster-10.802	2.567	1.673	1.02	1.641	0.101	0.235	SFC-023_S32_L002_Contig575,SFU2_S5_L001_Contig718,IFC66_S31_L002_Contig1788
SFC-21_S22_L002_Contig2686	Cluster-10.943	2.333	-2.722	1.659	-1.641	0.101	0.235	SFC-21_S22_L002_Contig2686
SFM-10_S1_L001_Contig1854	Cluster-10.423	9.478	-1.629	1.004	-1.623	0.105	0.241	SFM-10_S1_L001_Contig1854
IFM12_S16_Contig681	Cluster-10.1006	3.733	-1.512	0.93	-1.627	0.104	0.241	IFM12_S16_Contig681
SFC-21_S22_L002_Contig2710	Cluster-10.1164	3.523	-2.743	1.691	-1.622	0.105	0.241	SFC-21_S22_L002_Contig2710
SFC17_S7_L001_Contig1985,IFM23_S4_12385_soapGraphK31	Cluster-253.0	0.668	-3.809	2.342	-1.626	0.104	0.241	SFC17_S7_L001_Contig1985,IFM23_S4_12385_soapGraphK31
SFC15-CM_S29_L002_Contig1954,IFM27_S9_1788_soapGraphK61	Cluster-10.1148	45.544	-2.824	1.748	-1.615	0.106	0.244	SFC15-CM_S29_L002_Contig1954,IFM27_S9_1788_soapGraphK61
IFD8_S2_Contig1004	Cluster-10.579	0.697	-3.122	1.94	-1.609	0.108	0.246	IFD8_S2_Contig1004
SFC22_S9_L001_Contig2982,SFC22_S9_L001_Contig1511,SFC-023_S32_L002_Contig803,SXC2_S4_L001_Contig1908	Cluster-10.694	48.622	1.743	1.084	1.608	0.108	0.246	SFC22_S9_L001_Contig2982,SFC22_S9_L001_Contig1511,SFC-023_S32_L002_Contig803,SXC2_S4_L001_Contig1908
IFM21_S3_4285_soapGraphK51,IFM27_S9_Contig425,IFC66_S31_L002_Contig1319,IFM21_S3_Contig1043	Cluster-10.901	5.817	-2.454	1.53	-1.604	0.109	0.247	IFM21_S3_4285_soapGraphK51,IFM27_S9_Contig425,IFC66_S31_L002_Contig1319,IFM21_S3_Contig1043
SFC16_S6_L001_Contig1609,SFM-6_S3_L001_16511_soapGraphK41	Cluster-10.1132	6.443	2.153	1.346	1.6	0.11	0.248	SFC16_S6_L001_Contig1609,SFM-6_S3_L001_16511_soapGraphK41
SFM-6_S3_L001_Contig1751	Cluster-10.233	0.767	3.726	2.333	1.597	0.11	0.249	SFM-6_S3_L001_Contig1751
IFM-049_S6_441236_soapGraphK21,SFM-5_S2_L001_Contig1961,IFM24_S5_Contig988,IFM061_S15_Contig908,IFM53_S14_L001_Contig2431	Cluster-10.443	152.765	-2.233	1.42	-1.572	0.116	0.258	IFM-049_S6_441236_soapGraphK21,SFM-5_S2_L001_Contig1961,IFM24_S5_Contig988,IFM061_S15_Contig908,IFM53_S14_L001_Contig2431
SFU2_S5_L001_Contig1843	Cluster-10.601	2.458	-2.487	1.579	-1.575	0.115	0.258	SFU2_S5_L001_Contig1843
SFC22_S9_L001_Contig3183,IFM57_S30_L002_Contig621	Cluster-10.1004	0.844	3.405	2.162	1.575	0.115	0.258	SFC22_S9_L001_Contig3183,IFM57_S30_L002_Contig621
IFM-049_S6_Contig41093	Cluster-10.1178	5.052	-2.185	1.39	-1.572	0.116	0.258	IFM-049_S6_Contig41093
SFC-21_S22_L002_Contig2645,IFM050_S11_Contig3711	Cluster-10.427	0.834	-2.629	1.675	-1.57	0.117	0.259	SFC-21_S22_L002_Contig2645,IFM050_S11_Contig3711
IFM050_S11_Contig3791	Cluster-10.655	1.031	-3.381	2.163	-1.563	0.118	0.26	IFM050_S11_Contig3791
SFM-6_S3_L001_Contig5	Cluster-10.1167	3.801	-2.208	1.415	-1.56	0.119	0.26	SFM-6_S3_L001_Contig5
IFM054_S12_Contig1071,IFM047_S10_Contig1564,IFM53_S14_L001_Contig1296	Cluster-82.1	1.091	-3.162	2.026	-1.561	0.119	0.26	IFM054_S12_Contig1071,IFM047_S10_Contig1564,IFM53_S14_L001_Contig1296
IFM21_S3_Contig478,IFC66_S31_L002_Contig1791	Cluster-132.1	2.64	-2.477	1.587	-1.56	0.119	0.26	IFM21_S3_Contig478,IFC66_S31_L002_Contig1791
IFM054_S12_Contig1086,IFM047_S10_Contig1243,IFD8_S2_Contig631	Cluster-10.975	22.968	-1.692	1.088	-1.556	0.12	0.262	IFM054_S12_Contig1086,IFM047_S10_Contig1243,IFD8_S2_Contig631
SFU-3_S21_L002_Contig987	Cluster-10.603	2.243	-3.247	2.102	-1.544	0.123	0.267	SFU-3_S21_L002_Contig987
IFC66_S31_L002_Contig1828,IFM058_S13_Contig974	Cluster-10.860	0.925	-2.57	1.672	-1.537	0.124	0.27	IFC66_S31_L002_Contig1828,IFM058_S13_Contig974
IFM061_S15_Contig777,IFC63_S16_L001_Contig1258,SFU2_S5_L001_Contig995,IFM21_S3_Contig307,IFM56_S15_Contig1774,IFM23_S4_Contig587	Cluster-10.1068	4.606	-2.728	1.778	-1.534	0.125	0.27	IFM061_S15_Contig777,IFC63_S16_L001_Contig1258,SFU2_S5_L001_Contig995,IFM21_S3_Contig307,IFM56_S15_Contig1774,IFM23_S4_Contig587
SFM-3_S12_L001_Contig1434,SXC2_S4_L001_Contig1382	Cluster-300.0	0.816	3.304	2.157	1.532	0.126	0.271	SFM-3_S12_L001_Contig1434,SXC2_S4_L001_Contig1382
SFC22_S9_L001_8788_soapGraphK61,SFC22_S9_L001_Contig2790,SFC22_S9_L001_Contig2827,SFC22_S9_L001_Contig2379	Cluster-10.281	0.667	3.568	2.334	1.528	0.126	0.272	SFC22_S9_L001_8788_soapGraphK61,SFC22_S9_L001_Contig2790,SFC22_S9_L001_Contig2827,SFC22_S9_L001_Contig2379
SFM-10_S1_L001_Contig2456	Cluster-10.333	6.753	-2.463	1.614	-1.527	0.127	0.272	SFM-10_S1_L001_Contig2456
SFC22_S9_L001_Contig3097,SFM-3_S12_L001_Contig180,SFC13_S23_L002_Contig2417	Cluster-10.1039	3.304	1.974	1.295	1.524	0.127	0.272	SFC22_S9_L001_Contig3097,SFM-3_S12_L001_Contig180,SFC13_S23_L002_Contig2417
IFD8_S2_Contig724	Cluster-10.546	1.468	-3.306	2.172	-1.522	0.128	0.273	IFD8_S2_Contig724
SXC2_S4_L001_Contig1008	Cluster-169.0	0.656	3.543	2.335	1.518	0.129	0.274	SXC2_S4_L001_Contig1008
IFD6_S1_Contig954	Cluster-10.165	4.032	-1.237	0.818	-1.512	0.131	0.275	IFD6_S1_Contig954
IFM047_S10_Contig608,IFD8_S2_Contig624,IFM047_S10_Contig1238,SXC2_S4_L001_Contig1010,IFM061_S15_Contig763,IFM047_S10_Contig1614,IFM060_S14_Contig187,IFM054_S12_Contig442,IFM061_S15_Contig469,SFC13_S23_L002_Contig1774,IFD8_S2_Contig1115,SFM-3_S12_L001_Contig1996,SFM-8_S8_L001_Contig3580,SFM-10_S1_L001_Contig2571,SFC13_S23_L002_Contig2653,SFM-7_S13_L001_Contig644,IFM57_S30_L002_Contig1208,IFM24_S5_…	Cluster-10.1121	49.735	-1.219	0.806	-1.512	0.131	0.275	IFM047_S10_Contig608,IFD8_S2_Contig624,IFM047_S10_Contig1238,SXC2_S4_L001_Contig1010,IFM061_S15_Contig763,IFM047_S10_Contig1614,IFM060_S14_Contig187,IFM054_S12_Contig442,IFM061_S15_Contig469,SFC13_S23_L002_Contig1774,IFD8_S2_Contig1115,SFM-3_S12_L001_Contig1996,SFM-8_S8_L001_Contig3580,SFM-10_S1_L001_Contig2571,SFC13_S23_L002_Contig2653,SFM-7_S13_L001_Contig644,IFM57_S30_L002_Contig1208,IFM24_S5_…
SFC19_S24_L002_Contig1122,SFM-1_S11_L001_Contig801,IFC63_S16_L001_Contig2058,IFM24_S5_Contig674,SFU2_S5_L001_Contig736	Cluster-10.1163	15.648	-1.03	0.682	-1.511	0.131	0.275	SFC19_S24_L002_Contig1122,SFM-1_S11_L001_Contig801,IFC63_S16_L001_Contig2058,IFM24_S5_Contig674,SFU2_S5_L001_Contig736
IFC66_S31_L002_Contig1792,SFU2_S5_L001_Contig1437	Cluster-10.588	4.304	-2.264	1.506	-1.504	0.133	0.278	IFC66_S31_L002_Contig1792,SFU2_S5_L001_Contig1437
IFM-049_S6_Contig11101,IFM047_S10_Contig1215	Cluster-10.717	2.291	-2.382	1.589	-1.499	0.134	0.28	IFM-049_S6_Contig11101,IFM047_S10_Contig1215
SFC17_S7_L001_Contig2003,SFC15-CM_S29_L002_Contig1879	Cluster-10.1034	2.897	3.323	2.22	1.497	0.134	0.28	SFC17_S7_L001_Contig2003,SFC15-CM_S29_L002_Contig1879
IFM27_S9_Contig396	Cluster-10.466	2.573	-3.276	2.199	-1.49	0.136	0.283	IFM27_S9_Contig396
SFC17_S7_L001_Contig1986,SFM-1_S11_L001_Contig1614,SFC17_S7_L001_Contig1962	Cluster-10.416	1.246	2.953	1.988	1.485	0.137	0.284	SFC17_S7_L001_Contig1986,SFM-1_S11_L001_Contig1614,SFC17_S7_L001_Contig1962
SFC-21_S22_L002_Contig1719,IFM12_S16_Contig535,SFC16_S6_L001_Contig993	Cluster-263.0	4.26	-2.9	1.95	-1.487	0.137	0.284	SFC-21_S22_L002_Contig1719,IFM12_S16_Contig535,SFC16_S6_L001_Contig993
SFM-8_S8_L001_Contig3007,SFC22_S9_L001_Contig2222	Cluster-10.100	4.003	-2.478	1.675	-1.48	0.139	0.286	SFM-8_S8_L001_Contig3007,SFC22_S9_L001_Contig2222
SXC2_S4_L001_Contig1432	Cluster-10.456	2.201	2.49	1.684	1.479	0.139	0.286	SXC2_S4_L001_Contig1432
IFM061_S15_Contig236,SFC22_S9_L001_Contig3034,SFU2_S5_L001_Contig688,IFC63_S16_L001_Contig1264,IFC63_S16_L001_Contig1832,IFM061_S15_Contig496	Cluster-10.1046	25.37	-2.292	1.555	-1.474	0.141	0.288	IFM061_S15_Contig236,SFC22_S9_L001_Contig3034,SFU2_S5_L001_Contig688,IFC63_S16_L001_Contig1264,IFC63_S16_L001_Contig1832,IFM061_S15_Contig496
SFC14_S17_L001_10234_soapGraphK51,SFU-3_S21_L002_Contig615,SFC14_S17_L001_Contig2401,SFU-3_S21_L002_Contig1461,SFC17_S7_L001_Contig1006,SFU-3_S21_L002_Contig1044	Cluster-10.352	0.812	3.142	2.145	1.465	0.143	0.292	SFC14_S17_L001_10234_soapGraphK51,SFU-3_S21_L002_Contig615,SFC14_S17_L001_Contig2401,SFU-3_S21_L002_Contig1461,SFC17_S7_L001_Contig1006,SFU-3_S21_L002_Contig1044
IFM26_S8_Contig442,IFM047_S10_Contig1669,IFD8_S2_Contig820	Cluster-10.1001	1.747	-3.048	2.086	-1.461	0.144	0.293	IFM26_S8_Contig442,IFM047_S10_Contig1669,IFD8_S2_Contig820
IFM047_S10_Contig1435	Cluster-10.88	0.995	-3.157	2.17	-1.455	0.146	0.296	IFM047_S10_Contig1435
IFM054_S12_Contig701	Cluster-10.1169	4.17	-2.268	1.563	-1.451	0.147	0.297	IFM054_S12_Contig701
SFM-10_S1_L001_Contig2520,IFM24_S5_Contig212,IFC63_S16_L001_Contig2047,IFM061_S15_Contig970,SFU2_S5_L001_Contig1864,IFM21_S3_Contig771	Cluster-10.495	5.922	-2.161	1.501	-1.44	0.15	0.302	SFM-10_S1_L001_Contig2520,IFM24_S5_Contig212,IFC63_S16_L001_Contig2047,IFM061_S15_Contig970,SFU2_S5_L001_Contig1864,IFM21_S3_Contig771
SFC16_S6_L001_Contig1350,SFM-8_S8_L001_Contig1695	Cluster-10.946	1.979	-1.514	1.052	-1.439	0.15	0.302	SFC16_S6_L001_Contig1350,SFM-8_S8_L001_Contig1695
SFM-10_S1_L001_Contig1166,SFM-10_S1_L001_7089_soapGraphK61,SXC2_S4_L001_Contig1018,SFC-21_S22_L002_Contig2,SFM-10_S1_L001_Contig2255,SFM-7_S13_L001_Contig1472,SFM-10_S1_L001_Contig2575,SFC15-CM_S29_L002_Contig640,SXC2_S4_L001_26611_soapGraphK21	Cluster-10.414	19.266	1.987	1.383	1.436	0.151	0.303	SFM-10_S1_L001_Contig1166,SFM-10_S1_L001_7089_soapGraphK61,SXC2_S4_L001_Contig1018,SFC-21_S22_L002_Contig2,SFM-10_S1_L001_Contig2255,SFM-7_S13_L001_Contig1472,SFM-10_S1_L001_Contig2575,SFC15-CM_S29_L002_Contig640,SXC2_S4_L001_26611_soapGraphK21
IFM-049_S6_Contig17830,SFC-18_S20_L002_Contig1722,SFC16_S6_L001_Contig551,SFM-6_S3_L001_Contig2017,IFM-049_S6_Contig39839,SFM-6_S3_L001_Contig2019,SFC16_S6_L001_Contig1791,SFC-18_S20_L002_4654_soapGraphK61	Cluster-10.721	4.674	2.599	1.824	1.425	0.154	0.307	IFM-049_S6_Contig17830,SFC-18_S20_L002_Contig1722,SFC16_S6_L001_Contig551,SFM-6_S3_L001_Contig2017,IFM-049_S6_Contig39839,SFM-6_S3_L001_Contig2019,SFC16_S6_L001_Contig1791,SFC-18_S20_L002_4654_soapGraphK61
SFM-6_S3_L001_Contig1424	Cluster-10.1130	214.523	-0.647	0.454	-1.425	0.154	0.307	SFM-6_S3_L001_Contig1424
SFC17_S7_L001_Contig1365,IFM050_S11_Contig3650,IFM050_S11_Contig3781,IFM12_S16_Contig838,IFM050_S11_7780_soapGraphK61,IFM050_S11_Contig3393,IFM12_S16_Contig24	Cluster-10.469	1.534	-2.275	1.621	-1.404	0.16	0.316	SFC17_S7_L001_Contig1365,IFM050_S11_Contig3650,IFM050_S11_Contig3781,IFM12_S16_Contig838,IFM050_S11_7780_soapGraphK61,IFM050_S11_Contig3393,IFM12_S16_Contig24
IFM-049_S6_Contig40192,IFM12_S16_Contig686,IFM-049_S6_Contig16760,IFM-049_S6_Contig8066,SFM-7_S13_L001_Contig1892,IFM058_S13_Contig1074,IFM-049_S6_Contig34065,IFM058_S13_Contig43	Cluster-10.483	3.502	-2.178	1.55	-1.405	0.16	0.316	IFM-049_S6_Contig40192,IFM12_S16_Contig686,IFM-049_S6_Contig16760,IFM-049_S6_Contig8066,SFM-7_S13_L001_Contig1892,IFM058_S13_Contig1074,IFM-049_S6_Contig34065,IFM058_S13_Contig43
IFM050_S11_Contig3349	Cluster-10.568	2.269	-1.957	1.392	-1.406	0.16	0.316	IFM050_S11_Contig3349
IFD8_S2_Contig628,IFM054_S12_Contig894,IFM047_S10_Contig480,IFM054_S12_Contig1077,IFM047_S10_Contig617,SFM-10_S1_L001_Contig1058,IFM24_S5_Contig691,SFM-3_S12_L001_Contig1454,SFM-8_S8_L001_Contig1517,SFM-10_S1_L001_Contig1381,SFM-7_S13_L001_Contig1714,IFM57_S30_L002_Contig585,SFM-7_S13_L001_Contig1873,SFM-3_S12_L001_Contig1086,IFM57_S30_L002_Contig1138,IFM047_S10_Contig1436,IFM57_S30_L002_Contig15…	Cluster-10.1048	44.424	-1.171	0.834	-1.404	0.16	0.316	IFD8_S2_Contig628,IFM054_S12_Contig894,IFM047_S10_Contig480,IFM054_S12_Contig1077,IFM047_S10_Contig617,SFM-10_S1_L001_Contig1058,IFM24_S5_Contig691,SFM-3_S12_L001_Contig1454,SFM-8_S8_L001_Contig1517,SFM-10_S1_L001_Contig1381,SFM-7_S13_L001_Contig1714,IFM57_S30_L002_Contig585,SFM-7_S13_L001_Contig1873,SFM-3_S12_L001_Contig1086,IFM57_S30_L002_Contig1138,IFM047_S10_Contig1436,IFM57_S30_L002_Contig15…
IFM050_S11_Contig2235	Cluster-10.1057	3.566	-1.746	1.254	-1.393	0.164	0.322	IFM050_S11_Contig2235
SFU-3_S21_L002_Contig1462,SFC14_S17_L001_Contig1791,SFC17_S7_L001_Contig1422,SFC14_S17_L001_Contig1187,SFC17_S7_L001_Contig1995,SFC14_S17_L001_Contig2175,SFM-7_S13_L001_Contig1550,SFC17_S7_L001_Contig2009,IFM12_S16_Contig540,SFM-7_S13_L001_Contig1538	Cluster-10.378	2.658	2.419	1.751	1.382	0.167	0.327	SFU-3_S21_L002_Contig1462,SFC14_S17_L001_Contig1791,SFC17_S7_L001_Contig1422,SFC14_S17_L001_Contig1187,SFC17_S7_L001_Contig1995,SFC14_S17_L001_Contig2175,SFM-7_S13_L001_Contig1550,SFC17_S7_L001_Contig2009,IFM12_S16_Contig540,SFM-7_S13_L001_Contig1538
SFC14_S17_L001_Contig1221,SFU-3_S21_L002_Contig1523,SFU-3_S21_L002_Contig1699,IFM050_S11_Contig3748,IFM050_S11_Contig3782,SFU-3_S21_L002_Contig2032	Cluster-10.425	11.657	-0.947	0.689	-1.374	0.169	0.331	SFC14_S17_L001_Contig1221,SFU-3_S21_L002_Contig1523,SFU-3_S21_L002_Contig1699,IFM050_S11_Contig3748,IFM050_S11_Contig3782,SFU-3_S21_L002_Contig2032
SFC-18_S20_L002_Contig1724	Cluster-10.508	0.662	-2.352	1.719	-1.368	0.171	0.334	SFC-18_S20_L002_Contig1724
IFC66_S31_L002_Contig1836,SFM-10_S1_L001_Contig839,IFM24_S5_Contig648,SFM-7_S13_L001_Contig2084,IFM24_S5_Contig676,IFM53_S14_L001_Contig2657,SFM-7_S13_L001_5220_soapGraphK61,IFM21_S3_Contig678,IFC63_S16_L001_Contig1914,IFM53_S14_L001_Contig1601,SFM-7_S13_L001_Contig1886,SXC2_S4_L001_Contig1889,IFM21_S3_Contig928	Cluster-10.1136	25.049	-1.975	1.451	-1.361	0.174	0.337	IFC66_S31_L002_Contig1836,SFM-10_S1_L001_Contig839,IFM24_S5_Contig648,SFM-7_S13_L001_Contig2084,IFM24_S5_Contig676,IFM53_S14_L001_Contig2657,SFM-7_S13_L001_5220_soapGraphK61,IFM21_S3_Contig678,IFC63_S16_L001_Contig1914,IFM53_S14_L001_Contig1601,SFM-7_S13_L001_Contig1886,SXC2_S4_L001_Contig1889,IFM21_S3_Contig928
IFM27_S9_Contig592	Cluster-10.556	0.945	-2.023	1.489	-1.359	0.174	0.338	IFM27_S9_Contig592
SFC-023_S32_L002_Contig942,SFM-3_S12_L001_Contig1971,SFM-3_S12_L001_Contig1988,SFC13_S23_L002_Contig1269,SFC19_S24_L002_9470_soapGraphK51,SFC19_S24_L002_Contig1439,SFC19_S24_L002_Contig1542,SFC15-CM_S29_L002_Contig1939,SFC15-CM_S29_L002_Contig1057,SFC15-CM_S29_L002_Contig1453,SFC15-CM_S29_L002_Contig123,SFM-7_S13_L001_Contig597,SFC15-CM_S29_L002_Contig621,SFM-8_S8_L001_10054_soapGraphK61,SFU2_S5_…	Cluster-10.1127	35.331	1.177	0.869	1.354	0.176	0.34	SFC-023_S32_L002_Contig942,SFM-3_S12_L001_Contig1971,SFM-3_S12_L001_Contig1988,SFC13_S23_L002_Contig1269,SFC19_S24_L002_9470_soapGraphK51,SFC19_S24_L002_Contig1439,SFC19_S24_L002_Contig1542,SFC15-CM_S29_L002_Contig1939,SFC15-CM_S29_L002_Contig1057,SFC15-CM_S29_L002_Contig1453,SFC15-CM_S29_L002_Contig123,SFM-7_S13_L001_Contig597,SFC15-CM_S29_L002_Contig621,SFM-8_S8_L001_10054_soapGraphK61,SFU2_S5_…
SFM-3_S12_L001_Contig1083	Cluster-10.234	114.309	-0.977	0.726	-1.346	0.178	0.343	SFM-3_S12_L001_Contig1083
SFM-8_S8_L001_Contig3581	Cluster-10.937	1.171	-1.769	1.315	-1.345	0.179	0.343	SFM-8_S8_L001_Contig3581
IFM050_S11_Contig2043	Cluster-10.499	0.888	-2.757	2.067	-1.334	0.182	0.349	IFM050_S11_Contig2043
SFM-1_S11_L001_Contig2053,SFC16_S6_L001_Contig1045,SFC16_S6_L001_Contig547,SFM-6_S3_L001_Contig670,SXC2_S4_L001_Contig610,SFM-1_S11_L001_Contig556,SFM-1_S11_L001_4926_soapGraphK61,SFM-1_S11_L001_Contig2042,SFC16_S6_L001_Contig1398,SFM-1_S11_L001_Contig1868,SFM-1_S11_L001_Contig2051,SFM-6_S3_L001_Contig662,IFD6_S1_Contig352,SFM-6_S3_L001_Contig669,SFM-6_S3_L001_Contig1048,SFM-1_S11_L001_Contig1929…	Cluster-10.1114	38.706	0.973	0.731	1.331	0.183	0.35	SFM-1_S11_L001_Contig2053,SFC16_S6_L001_Contig1045,SFC16_S6_L001_Contig547,SFM-6_S3_L001_Contig670,SXC2_S4_L001_Contig610,SFM-1_S11_L001_Contig556,SFM-1_S11_L001_4926_soapGraphK61,SFM-1_S11_L001_Contig2042,SFC16_S6_L001_Contig1398,SFM-1_S11_L001_Contig1868,SFM-1_S11_L001_Contig2051,SFM-6_S3_L001_Contig662,IFD6_S1_Contig352,SFM-6_S3_L001_Contig669,SFM-6_S3_L001_Contig1048,SFM-1_S11_L001_Contig1929…
SFC15-CM_S29_L002_Contig1066,SFM-3_S12_L001_Contig1084,SFC22_S9_L001_Contig2538,IFM57_S30_L002_Contig493,SFM-3_S12_L001_Contig1065,SFC13_S23_L002_Contig1807,IFM57_S30_L002_Contig1306,SFC15-CM_S29_L002_Contig1378	Cluster-10.664	18.618	1.087	0.818	1.328	0.184	0.351	SFC15-CM_S29_L002_Contig1066,SFM-3_S12_L001_Contig1084,SFC22_S9_L001_Contig2538,IFM57_S30_L002_Contig493,SFM-3_S12_L001_Contig1065,SFC13_S23_L002_Contig1807,IFM57_S30_L002_Contig1306,SFC15-CM_S29_L002_Contig1378
SFC19_S24_L002_Contig2091,SFC13_S23_L002_Contig382	Cluster-10.185	1.785	2.08	1.575	1.321	0.186	0.354	SFC19_S24_L002_Contig2091,SFC13_S23_L002_Contig382
SFC22_S9_L001_Contig3201,SFM-8_S8_L001_Contig1625,IFM27_S9_1718_soapGraphK61,SFM-3_S12_L001_Contig1079,IFM050_S11_Contig3610	Cluster-10.1075	4.5	-1.873	1.419	-1.32	0.187	0.354	SFC22_S9_L001_Contig3201,SFM-8_S8_L001_Contig1625,IFM27_S9_1718_soapGraphK61,SFM-3_S12_L001_Contig1079,IFM050_S11_Contig3610
SFM-7_S13_L001_Contig417,SFC19_S24_L002_Contig1220	Cluster-10.101	6.194	-2.532	1.923	-1.317	0.188	0.355	SFM-7_S13_L001_Contig417,SFC19_S24_L002_Contig1220
IFM054_S12_Contig1081,IFM047_S10_4664_soapGraphK61,IFM050_S11_Contig3672,IFD8_S2_Contig597,SFC22_S9_L001_Contig2792,SFC22_S9_L001_8374_soapGraphK61,IFM047_S10_Contig1434,SFM-5_S2_L001_Contig2210,IFM050_S11_Contig3651	Cluster-10.154	3.952	-2.701	2.056	-1.313	0.189	0.355	IFM054_S12_Contig1081,IFM047_S10_4664_soapGraphK61,IFM050_S11_Contig3672,IFD8_S2_Contig597,SFC22_S9_L001_Contig2792,SFC22_S9_L001_8374_soapGraphK61,IFM047_S10_Contig1434,SFM-5_S2_L001_Contig2210,IFM050_S11_Contig3651
SXC2_S4_L001_Contig1523,IFM24_S5_Contig826,IFM24_S5_Contig917,SXC2_S4_L001_Contig998,SFC22_S9_L001_Contig1704,SFM-10_S1_L001_Contig2577,IFM-049_S6_Contig31739,IFC63_S16_L001_Contig2089,IFM061_S15_Contig595,SFU2_S5_L001_Contig1069,IFM21_S3_Contig1061,SXC2_S4_L001_Contig1406,IFM061_S15_Contig1001,IFM53_S14_L001_Contig2113,SFU2_S5_L001_Contig514,SFU2_S5_L001_Contig1065	Cluster-10.1020	10.768	-1.769	1.346	-1.314	0.189	0.355	SXC2_S4_L001_Contig1523,IFM24_S5_Contig826,IFM24_S5_Contig917,SXC2_S4_L001_Contig998,SFC22_S9_L001_Contig1704,SFM-10_S1_L001_Contig2577,IFM-049_S6_Contig31739,IFC63_S16_L001_Contig2089,IFM061_S15_Contig595,SFU2_S5_L001_Contig1069,IFM21_S3_Contig1061,SXC2_S4_L001_Contig1406,IFM061_S15_Contig1001,IFM53_S14_L001_Contig2113,SFU2_S5_L001_Contig514,SFU2_S5_L001_Contig1065
SXC2_S4_L001_Contig1398	Cluster-10.710	1.537	-1.357	1.044	-1.299	0.194	0.363	SXC2_S4_L001_Contig1398
SXC2_S4_L001_Contig1677,SFC22_S9_L001_Contig2821,SFM-6_S3_L001_Contig97,SFC22_S9_L001_Contig2296,SFM-6_S3_L001_Contig701	Cluster-10.162	1.819	2.587	2.005	1.29	0.197	0.368	SXC2_S4_L001_Contig1677,SFC22_S9_L001_Contig2821,SFM-6_S3_L001_Contig97,SFC22_S9_L001_Contig2296,SFM-6_S3_L001_Contig701
IFM047_S10_Contig1622,IFM050_S11_Contig2851,IFM054_S12_Contig1073,SFM-5_S2_L001_Contig2204,IFD8_S2_Contig637,SFC17_S7_L001_Contig1969,IFM061_S15_Contig879,SFU2_S5_L001_Contig1710,SFC19_S24_L002_Contig2076,SXC2_S4_L001_Contig1868,IFM26_S8_Contig478,IFD6_S1_Contig961	Cluster-10.1072	44.353	-0.966	0.751	-1.285	0.199	0.37	IFM047_S10_Contig1622,IFM050_S11_Contig2851,IFM054_S12_Contig1073,SFM-5_S2_L001_Contig2204,IFD8_S2_Contig637,SFC17_S7_L001_Contig1969,IFM061_S15_Contig879,SFU2_S5_L001_Contig1710,SFC19_S24_L002_Contig2076,SXC2_S4_L001_Contig1868,IFM26_S8_Contig478,IFD6_S1_Contig961
SFC-21_S22_L002_Contig2707	Cluster-10.920	0.666	-2.495	1.949	-1.28	0.2	0.372	SFC-21_S22_L002_Contig2707
SFM-8_S8_L001_Contig3599	Cluster-322.0	1.104	-2.027	1.582	-1.282	0.2	0.372	SFM-8_S8_L001_Contig3599
SFM-10_S1_L001_Contig2533	Cluster-10.992	4.071	-1.288	1.011	-1.275	0.202	0.373	SFM-10_S1_L001_Contig2533
SFM-6_S3_L001_Contig1242,SFC13_S23_L002_Contig2425	Cluster-296.0	0.878	2.633	2.064	1.276	0.202	0.373	SFM-6_S3_L001_Contig1242,SFC13_S23_L002_Contig2425
IFC66_S31_L002_Contig1832,SFC22_S9_L001_Contig3229,IFC66_S31_L002_Contig1845,IFM57_S30_L002_Contig139,IFC66_S31_L002_Contig1770,IFC66_S31_L002_Contig1570,IFC66_S31_L002_5154_soapGraphK61,IFC66_S31_L002_5294_soapGraphK61,IFM57_S30_L002_4366_soapGraphK61,IFM57_S30_L002_Contig1549,IFM57_S30_L002_Contig1691	Cluster-10.56	6.37	-2.45	1.929	-1.27	0.204	0.374	IFC66_S31_L002_Contig1832,SFC22_S9_L001_Contig3229,IFC66_S31_L002_Contig1845,IFM57_S30_L002_Contig139,IFC66_S31_L002_Contig1770,IFC66_S31_L002_Contig1570,IFC66_S31_L002_5154_soapGraphK61,IFC66_S31_L002_5294_soapGraphK61,IFM57_S30_L002_4366_soapGraphK61,IFM57_S30_L002_Contig1549,IFM57_S30_L002_Contig1691
SFC-21_S22_L002_Contig2693	Cluster-10.1165	4.173	1.407	1.105	1.272	0.203	0.374	SFC-21_S22_L002_Contig2693
IFC66_S31_L002_Contig974,IFC66_S31_L002_5326_soapGraphK61,IFC66_S31_L002_Contig1564,IFC66_S31_L002_Contig1582	Cluster-10.925	3.557	-2.055	1.623	-1.266	0.205	0.375	IFC66_S31_L002_Contig974,IFC66_S31_L002_5326_soapGraphK61,IFC66_S31_L002_Contig1564,IFC66_S31_L002_Contig1582
SFC16_S6_L001_Contig1005	Cluster-315.0	1.524	-2.903	2.293	-1.266	0.206	0.375	SFC16_S6_L001_Contig1005
IFM26_S8_Contig647	Cluster-10.761	1.47	-2.034	1.611	-1.262	0.207	0.376	IFM26_S8_Contig647
IFM058_S13_Contig411,SFM-8_S8_L001_Contig3595,IFM058_S13_Contig456,IFM058_S13_Contig421,SFM-8_S8_L001_44278_soapGraphK21,IFM058_S13_Contig461,IFM57_S30_L002_Contig1314,SFC-21_S22_L002_Contig2612,SFC22_S9_L001_Contig3203,SFC22_S9_L001_Contig832	Cluster-10.1172	9.562	-1.117	0.885	-1.262	0.207	0.376	IFM058_S13_Contig411,SFM-8_S8_L001_Contig3595,IFM058_S13_Contig456,IFM058_S13_Contig421,SFM-8_S8_L001_44278_soapGraphK21,IFM058_S13_Contig461,IFM57_S30_L002_Contig1314,SFC-21_S22_L002_Contig2612,SFC22_S9_L001_Contig3203,SFC22_S9_L001_Contig832
SFC15-CM_S29_L002_Contig1973,IFM21_S3_Contig936,SFM-10_S1_L001_Contig2563,IFM24_S5_Contig693,SFC19_S24_L002_Contig2101,IFM24_S5_Contig986,IFC63_S16_L001_Contig1061,IFM061_S15_Contig598,IFM061_S15_Contig776,SFM-10_S1_L001_Contig2230,IFM27_S9_Contig597,IFM14_S7_Contig291,SFC19_S24_L002_5732_soapGraphK61,IFM24_S5_Contig915,IFM21_S3_Contig916,SFC-21_S22_L002_Contig2159,SFC-21_S22_L002_Contig2471,IFM2…	Cluster-10.758	272.666	-1.944	1.546	-1.258	0.209	0.377	SFC15-CM_S29_L002_Contig1973,IFM21_S3_Contig936,SFM-10_S1_L001_Contig2563,IFM24_S5_Contig693,SFC19_S24_L002_Contig2101,IFM24_S5_Contig986,IFC63_S16_L001_Contig1061,IFM061_S15_Contig598,IFM061_S15_Contig776,SFM-10_S1_L001_Contig2230,IFM27_S9_Contig597,IFM14_S7_Contig291,SFC19_S24_L002_5732_soapGraphK61,IFM24_S5_Contig915,IFM21_S3_Contig916,SFC-21_S22_L002_Contig2159,SFC-21_S22_L002_Contig2471,IFM2…
IFM27_S9_13048_soapGraphK31	Cluster-10.198	5.01	-2.098	1.677	-1.251	0.211	0.38	IFM27_S9_13048_soapGraphK31
IFM058_S13_Contig1080	Cluster-10.1102	2.146	-2.52	2.012	-1.252	0.21	0.38	IFM058_S13_Contig1080
IFM058_S13_Contig1056	Cluster-10.781	0.79	-1.775	1.425	-1.246	0.213	0.382	IFM058_S13_Contig1056
IFM050_S11_Contig3352	Cluster-10.175	0.666	-2.69	2.169	-1.241	0.215	0.383	IFM050_S11_Contig3352
IFM058_S13_Contig1099,SFM-5_S2_L001_Contig2422	Cluster-10.1087	1.201	2.104	1.696	1.24	0.215	0.383	IFM058_S13_Contig1099,SFM-5_S2_L001_Contig2422
SFC22_S9_L001_Contig1738,SFC13_S23_L002_Contig1235,IFM050_S11_Contig1122,IFC66_S31_L002_Contig634	Cluster-291.0	9.193	-0.825	0.663	-1.244	0.214	0.383	SFC22_S9_L001_Contig1738,SFC13_S23_L002_Contig1235,IFM050_S11_Contig1122,IFC66_S31_L002_Contig634
SFC13_S23_L002_Contig2747	Cluster-10.262	1.152	-1.757	1.423	-1.235	0.217	0.386	SFC13_S23_L002_Contig2747
SFC15-CM_S29_L002_Contig1480,SFM-8_S8_L001_Contig2426,SFU2_S5_L001_Contig1453,IFM12_S16_Contig390,SFC22_S9_L001_Contig3202,SFM-7_S13_L001_Contig1874,IFM57_S30_L002_Contig991,SFM-7_S13_L001_Contig1554,SFC17_S7_L001_Contig1293,IFM058_S13_Contig660	Cluster-10.680	10.587	-1.077	0.874	-1.233	0.218	0.386	SFC15-CM_S29_L002_Contig1480,SFM-8_S8_L001_Contig2426,SFU2_S5_L001_Contig1453,IFM12_S16_Contig390,SFC22_S9_L001_Contig3202,SFM-7_S13_L001_Contig1874,IFM57_S30_L002_Contig991,SFM-7_S13_L001_Contig1554,SFC17_S7_L001_Contig1293,IFM058_S13_Contig660
SFM-10_S1_L001_Contig1838,SXC2_S4_L001_Contig1411,SFM-10_S1_L001_Contig1835,IFM21_S3_Contig564	Cluster-10.855	0.806	-2.378	1.94	-1.225	0.22	0.39	SFM-10_S1_L001_Contig1838,SXC2_S4_L001_Contig1411,SFM-10_S1_L001_Contig1835,IFM21_S3_Contig564
IFM27_S9_Contig357,IFM12_S16_Contig653	Cluster-143.0	3.991	-2.725	2.245	-1.214	0.225	0.396	IFM27_S9_Contig357,IFM12_S16_Contig653
SFC-18_S20_L002_Contig1322,IFM-049_S6_Contig41067,SFM-6_S3_L001_Contig1113,SFM-6_S3_L001_Contig1454,SFC16_S6_L001_Contig1392	Cluster-10.730	0.717	2.743	2.268	1.21	0.226	0.397	SFC-18_S20_L002_Contig1322,IFM-049_S6_Contig41067,SFM-6_S3_L001_Contig1113,SFM-6_S3_L001_Contig1454,SFC16_S6_L001_Contig1392
IFC66_S31_L002_Contig1578,IFC66_S31_L002_5204_soapGraphK61	Cluster-10.988	2.932	-2.12	1.75	-1.212	0.226	0.397	IFC66_S31_L002_Contig1578,IFC66_S31_L002_5204_soapGraphK61
SFM-1_S11_L001_Contig1978,SXC2_S4_L001_4698_soapGraphK61	Cluster-10.1010	0.68	2.599	2.15	1.209	0.227	0.397	SFM-1_S11_L001_Contig1978,SXC2_S4_L001_4698_soapGraphK61
IFD6_S1_Contig277	Cluster-127.0	1.736	-2.751	2.292	-1.201	0.23	0.4	IFD6_S1_Contig277
SFC13_S23_L002_Contig1723	Cluster-301.0	0.838	-2.216	1.846	-1.201	0.23	0.4	SFC13_S23_L002_Contig1723
IFM047_S10_Contig602	Cluster-10.258	0.894	-2.593	2.169	-1.196	0.232	0.401	IFM047_S10_Contig602
IFM27_S9_Contig629,IFM21_S3_Contig803	Cluster-10.609	3.116	-2.236	1.869	-1.196	0.232	0.401	IFM27_S9_Contig629,IFM21_S3_Contig803
IFM050_S11_Contig3440	Cluster-10.935	1.669	-2.628	2.201	-1.194	0.232	0.402	IFM050_S11_Contig3440
SFM-7_S13_L001_Contig1876,SFM-7_S13_L001_Contig1507,IFM047_S10_Contig1245,SFC22_S9_L001_Contig2323,SFC17_S7_L001_Contig1418,IFM061_S15_Contig886,SFM-8_S8_L001_Contig2506,IFM-049_S6_391446_soapGraphK31,IFM047_S10_Contig775,IFM57_S30_L002_Contig61,SFC13_S23_L002_Contig1415,IFM058_S13_Contig879,SFC13_S23_L002_Contig2452,SXC2_S4_L001_Contig1666,IFM26_S8_Contig249,SFC13_S23_L002_19500_soapGraphK41,IFM…	Cluster-10.413	48.713	-1.029	0.874	-1.177	0.239	0.407	SFM-7_S13_L001_Contig1876,SFM-7_S13_L001_Contig1507,IFM047_S10_Contig1245,SFC22_S9_L001_Contig2323,SFC17_S7_L001_Contig1418,IFM061_S15_Contig886,SFM-8_S8_L001_Contig2506,IFM-049_S6_391446_soapGraphK31,IFM047_S10_Contig775,IFM57_S30_L002_Contig61,SFC13_S23_L002_Contig1415,IFM058_S13_Contig879,SFC13_S23_L002_Contig2452,SXC2_S4_L001_Contig1666,IFM26_S8_Contig249,SFC13_S23_L002_19500_soapGraphK41,IFM…
SFM-1_S11_L001_Contig2097,IFM-049_S6_Contig387	Cluster-10.602	3.225	-2.223	1.88	-1.183	0.237	0.407	SFM-1_S11_L001_Contig2097,IFM-049_S6_Contig387
IFD6_S1_Contig731,SFC-025_S33_L002_Contig7,IFM21_S3_Contig622,IFC66_S31_L002_Contig1813,IFM050_S11_Contig3763	Cluster-10.652	0.699	-2.311	1.95	-1.185	0.236	0.407	IFD6_S1_Contig731,SFC-025_S33_L002_Contig7,IFM21_S3_Contig622,IFC66_S31_L002_Contig1813,IFM050_S11_Contig3763
SFC13_S23_L002_Contig2509,SXC2_S4_L001_Contig1901,SFM-3_S12_L001_Contig1998,SXC2_S4_L001_8205_soapGraphK51,SFC13_S23_L002_Contig2721	Cluster-10.930	3.882	1.874	1.586	1.182	0.237	0.407	SFC13_S23_L002_Contig2509,SXC2_S4_L001_Contig1901,SFM-3_S12_L001_Contig1998,SXC2_S4_L001_8205_soapGraphK51,SFC13_S23_L002_Contig2721
SFC22_S9_L001_Contig963,SFM-8_S8_L001_10436_soapGraphK61,SFM-8_S8_L001_Contig3596,SFC22_S9_L001_Contig2656	Cluster-10.1051	2.226	-2.382	2.022	-1.178	0.239	0.407	SFC22_S9_L001_Contig963,SFM-8_S8_L001_10436_soapGraphK61,SFM-8_S8_L001_Contig3596,SFC22_S9_L001_Contig2656
IFM24_S5_Contig960,IFC63_S16_L001_Contig1642,SFC-21_S22_L002_Contig2699,SXC2_S4_L001_Contig994,IFM21_S3_Contig583,IFC66_S31_L002_Contig1727,SFC17_S7_L001_Contig1730,IFM53_S14_L001_Contig2403,SFC17_S7_L001_Contig1740,SFC-21_S22_L002_Contig2675,SFU-3_S21_L002_Contig1745,IFM050_S11_Contig2160,IFC66_S31_L002_Contig1262,IFM050_S11_Contig3768,SFC16_S6_L001_Contig946,IFM21_S3_Contig914,SFC14_S17_L001_Co…	Cluster-10.1117	3326.44	0.741	0.63	1.177	0.239	0.407	IFM24_S5_Contig960,IFC63_S16_L001_Contig1642,SFC-21_S22_L002_Contig2699,SXC2_S4_L001_Contig994,IFM21_S3_Contig583,IFC66_S31_L002_Contig1727,SFC17_S7_L001_Contig1730,IFM53_S14_L001_Contig2403,SFC17_S7_L001_Contig1740,SFC-21_S22_L002_Contig2675,SFU-3_S21_L002_Contig1745,IFM050_S11_Contig2160,IFC66_S31_L002_Contig1262,IFM050_S11_Contig3768,SFC16_S6_L001_Contig946,IFM21_S3_Contig914,SFC14_S17_L001_Co…
SFM-8_S8_L001_Contig1599,IFC66_S31_L002_Contig1510,IFM21_S3_Contig1031,IFM12_S16_Contig814,IFM27_S9_Contig525,IFM27_S9_1700_soapGraphK61,IFC66_S31_L002_Contig1209,IFM27_S9_Contig548	Cluster-10.189	5.751	-1.784	1.54	-1.159	0.247	0.414	SFM-8_S8_L001_Contig1599,IFC66_S31_L002_Contig1510,IFM21_S3_Contig1031,IFM12_S16_Contig814,IFM27_S9_Contig525,IFM27_S9_1700_soapGraphK61,IFC66_S31_L002_Contig1209,IFM27_S9_Contig548
SFC17_S7_L001_Contig1754,SFC17_S7_L001_5603_soapGraphK61	Cluster-10.747	3.272	-1.71	1.478	-1.157	0.247	0.414	SFC17_S7_L001_Contig1754,SFC17_S7_L001_5603_soapGraphK61
IFM-049_S6_237076_soapGraphK51,IFM-049_S6_Contig3993	Cluster-10.919	8.496	-1.687	1.449	-1.164	0.244	0.414	IFM-049_S6_237076_soapGraphK51,IFM-049_S6_Contig3993
SXC2_S4_L001_20990_soapGraphK31,SFM-10_S1_L001_Contig2526,SXC2_S4_L001_Contig1408,SXC2_S4_L001_Contig1892,SXC2_S4_L001_8133_soapGraphK51,SFC14_S17_L001_Contig2139,SFU-3_S21_L002_Contig2022,SFU-3_S21_L002_Contig1770,SXC2_S4_L001_Contig1854	Cluster-10.954	2.929	1.613	1.388	1.162	0.245	0.414	SXC2_S4_L001_20990_soapGraphK31,SFM-10_S1_L001_Contig2526,SXC2_S4_L001_Contig1408,SXC2_S4_L001_Contig1892,SXC2_S4_L001_8133_soapGraphK51,SFC14_S17_L001_Contig2139,SFU-3_S21_L002_Contig2022,SFU-3_S21_L002_Contig1770,SXC2_S4_L001_Contig1854
SFM-3_S12_L001_Contig669,SFC13_S23_L002_Contig2734,SFC19_S24_L002_Contig1154	Cluster-10.1100	1.125	2.293	1.974	1.161	0.245	0.414	SFM-3_S12_L001_Contig669,SFC13_S23_L002_Contig2734,SFC19_S24_L002_Contig1154
SFC-21_S22_L002_Contig2465,SFC-21_S22_L002_Contig2459,SFM-7_S13_L001_Contig1546,SFU-3_S21_L002_Contig2025,IFM21_S3_Contig1048,IFM21_S3_Contig971,SFC14_S17_L001_Contig2399,SFM-7_S13_L001_Contig1491,SFU-3_S21_L002_Contig2021,SFC14_S17_L001_Contig395,SFM-3_S12_L001_Contig2007,SXC2_S4_L001_Contig1904,SXC2_S4_L001_Contig1433,SFU-3_S21_L002_Contig1463,SFC-21_S22_L002_Contig2470,SFC14_S17_L001_Contig240…	Cluster-10.1161	75.491	1.108	0.956	1.16	0.246	0.414	SFC-21_S22_L002_Contig2465,SFC-21_S22_L002_Contig2459,SFM-7_S13_L001_Contig1546,SFU-3_S21_L002_Contig2025,IFM21_S3_Contig1048,IFM21_S3_Contig971,SFC14_S17_L001_Contig2399,SFM-7_S13_L001_Contig1491,SFU-3_S21_L002_Contig2021,SFC14_S17_L001_Contig395,SFM-3_S12_L001_Contig2007,SXC2_S4_L001_Contig1904,SXC2_S4_L001_Contig1433,SFU-3_S21_L002_Contig1463,SFC-21_S22_L002_Contig2470,SFC14_S17_L001_Contig240…
SFM-3_S12_L001_Contig619,SFC13_S23_L002_6798_soapGraphK61,SFC13_S23_L002_Contig2475,SFC13_S23_L002_Contig1727,IFM56_S15_Contig901,IFM57_S30_L002_Contig1716,IFM56_S15_Contig701,SXC2_S4_L001_4752_soapGraphK61,SXC2_S4_L001_Contig1699,SFC-21_S22_L002_Contig1103,IFM23_S4_Contig284	Cluster-10.870	33.128	1.684	1.458	1.155	0.248	0.415	SFM-3_S12_L001_Contig619,SFC13_S23_L002_6798_soapGraphK61,SFC13_S23_L002_Contig2475,SFC13_S23_L002_Contig1727,IFM56_S15_Contig901,IFM57_S30_L002_Contig1716,IFM56_S15_Contig701,SXC2_S4_L001_4752_soapGraphK61,SXC2_S4_L001_Contig1699,SFC-21_S22_L002_Contig1103,IFM23_S4_Contig284
SFU-3_S21_L002_Contig1063	Cluster-10.874	0.949	1.401	1.215	1.153	0.249	0.416	SFU-3_S21_L002_Contig1063
SFC16_S6_L001_Contig1382	Cluster-10.543	1.238	-2.256	1.968	-1.146	0.252	0.418	SFC16_S6_L001_Contig1382
SFM-8_S8_L001_Contig1555,IFM23_S4_Contig576,IFM23_S4_Contig492,IFM23_S4_Contig467,IFM23_S4_Contig346,SFC13_S23_L002_28725_soapGraphK21,SFM-3_S12_L001_25856_soapGraphK21,SFC22_S9_L001_41012_soapGraphK21,IFM56_S15_Contig1529,IFM57_S30_L002_Contig1019,SFM-3_S12_L001_Contig1994,SFC13_S23_L002_Contig1806,SFM-3_S12_L001_Contig2002,SFC22_S9_L001_Contig3230	Cluster-10.642	64.119	0.892	0.778	1.148	0.251	0.418	SFM-8_S8_L001_Contig1555,IFM23_S4_Contig576,IFM23_S4_Contig492,IFM23_S4_Contig467,IFM23_S4_Contig346,SFC13_S23_L002_28725_soapGraphK21,SFM-3_S12_L001_25856_soapGraphK21,SFC22_S9_L001_41012_soapGraphK21,IFM56_S15_Contig1529,IFM57_S30_L002_Contig1019,SFM-3_S12_L001_Contig1994,SFC13_S23_L002_Contig1806,SFM-3_S12_L001_Contig2002,SFC22_S9_L001_Contig3230
SFC-21_S22_L002_Contig1574,SFM-8_S8_L001_Contig3586,SFC16_S6_L001_Contig1633,SFM-8_S8_L001_Contig3517,SFC-18_S20_L002_Contig1155	Cluster-10.1156	5.512	-1.466	1.289	-1.138	0.255	0.423	SFC-21_S22_L002_Contig1574,SFM-8_S8_L001_Contig3586,SFC16_S6_L001_Contig1633,SFM-8_S8_L001_Contig3517,SFC-18_S20_L002_Contig1155
SFM-8_S8_L001_Contig1534,SFM-10_S1_L001_Contig1104,SFC22_S9_L001_22878_soapGraphK41,SFC13_S23_L002_Contig2447,IFC66_S31_L002_Contig1842,IFM050_S11_Contig3409,IFM050_S11_7918_soapGraphK61	Cluster-10.1109	6.934	-0.993	0.877	-1.133	0.257	0.424	SFM-8_S8_L001_Contig1534,SFM-10_S1_L001_Contig1104,SFC22_S9_L001_22878_soapGraphK41,SFC13_S23_L002_Contig2447,IFC66_S31_L002_Contig1842,IFM050_S11_Contig3409,IFM050_S11_7918_soapGraphK61
SFC-21_S22_L002_6704_soapGraphK61,SFC-21_S22_L002_Contig2480	Cluster-10.1125	0.978	-1.785	1.576	-1.133	0.257	0.424	SFC-21_S22_L002_6704_soapGraphK61,SFC-21_S22_L002_Contig2480
SFC-023_S32_L002_Contig1152	Cluster-10.353	0.797	1.733	1.543	1.123	0.261	0.429	SFC-023_S32_L002_Contig1152
SFC13_S23_L002_Contig2114,IFM21_S3_Contig325	Cluster-56.2	0.717	-2.315	2.061	-1.123	0.261	0.429	SFC13_S23_L002_Contig2114,IFM21_S3_Contig325
SFC19_S24_L002_Contig625,IFC66_S31_L002_5344_soapGraphK61,IFC66_S31_L002_Contig1005,IFM-049_S6_139745_soapGraphK61,IFC66_S31_L002_Contig1300,IFM-049_S6_Contig323,IFM-049_S6_Contig38368,SFC19_S24_L002_Contig364,IFM-049_S6_Contig19373,SFC19_S24_L002_Contig695,SFC19_S24_L002_Contig714,SFC-21_S22_L002_Contig2486,IFM-049_S6_Contig3615	Cluster-10.932	17.781	-1.303	1.167	-1.117	0.264	0.432	SFC19_S24_L002_Contig625,IFC66_S31_L002_5344_soapGraphK61,IFC66_S31_L002_Contig1005,IFM-049_S6_139745_soapGraphK61,IFC66_S31_L002_Contig1300,IFM-049_S6_Contig323,IFM-049_S6_Contig38368,SFC19_S24_L002_Contig364,IFM-049_S6_Contig19373,SFC19_S24_L002_Contig695,SFC19_S24_L002_Contig714,SFC-21_S22_L002_Contig2486,IFM-049_S6_Contig3615
IFC66_S31_L002_Contig1323	Cluster-10.638	2.647	-1.608	1.442	-1.115	0.265	0.433	IFC66_S31_L002_Contig1323
IFM047_S10_Contig1098,SFC16_S6_L001_Contig462,IFD8_S2_Contig366,IFM054_S12_Contig1006,SFC16_S6_L001_Contig1631,IFM047_S10_Contig1252,IFM054_S12_23533_soapGraphK21,SFC22_S9_L001_Contig314,IFM047_S10_Contig1240,IFM047_S10_Contig439,SFC22_S9_L001_Contig972,SXC2_S4_L001_Contig594,IFM21_S3_Contig278,SFC16_S6_L001_Contig1790,IFM047_S10_Contig1444,SXC2_S4_L001_Contig1409	Cluster-10.972	6.666	-1.098	0.999	-1.099	0.272	0.443	IFM047_S10_Contig1098,SFC16_S6_L001_Contig462,IFD8_S2_Contig366,IFM054_S12_Contig1006,SFC16_S6_L001_Contig1631,IFM047_S10_Contig1252,IFM054_S12_23533_soapGraphK21,SFC22_S9_L001_Contig314,IFM047_S10_Contig1240,IFM047_S10_Contig439,SFC22_S9_L001_Contig972,SXC2_S4_L001_Contig594,IFM21_S3_Contig278,SFC16_S6_L001_Contig1790,IFM047_S10_Contig1444,SXC2_S4_L001_Contig1409
SFM-10_S1_L001_Contig2573	Cluster-302.0	7.949	-2.322	2.132	-1.089	0.276	0.449	SFM-10_S1_L001_Contig2573
SFC22_S9_L001_Contig3213,IFM57_S30_L002_Contig1706,SFC16_S6_L001_Contig1794,SFC-023_S32_L002_Contig1147,IFM57_S30_L002_14033_soapGraphK41,SFC16_S6_L001_Contig1786,SFC-18_S20_L002_Contig1135,SFC22_S9_L001_Contig2356,IFM57_S30_L002_Contig1559,IFM57_S30_L002_Contig939,SFC16_S6_L001_Contig1623,SFC16_S6_L001_4373_soapGraphK61,SFC-023_S32_L002_Contig1163,IFM27_S9_Contig504,SFC-18_S20_L002_Contig1716,IF…	Cluster-10.929	18.444	1.486	1.376	1.08	0.28	0.454	SFC22_S9_L001_Contig3213,IFM57_S30_L002_Contig1706,SFC16_S6_L001_Contig1794,SFC-023_S32_L002_Contig1147,IFM57_S30_L002_14033_soapGraphK41,SFC16_S6_L001_Contig1786,SFC-18_S20_L002_Contig1135,SFC22_S9_L001_Contig2356,IFM57_S30_L002_Contig1559,IFM57_S30_L002_Contig939,SFC16_S6_L001_Contig1623,SFC16_S6_L001_4373_soapGraphK61,SFC-023_S32_L002_Contig1163,IFM27_S9_Contig504,SFC-18_S20_L002_Contig1716,IF…
SFM-1_S11_L001_Contig1916	Cluster-10.222	5.811	0.989	0.924	1.071	0.284	0.455	SFM-1_S11_L001_Contig1916
IFM060_S14_Contig304,SFM-8_S8_L001_Contig3229,IFM058_S13_Contig1093,SFU-3_S21_L002_Contig1452	Cluster-10.373	14.254	1.648	1.536	1.073	0.283	0.455	IFM060_S14_Contig304,SFM-8_S8_L001_Contig3229,IFM058_S13_Contig1093,SFU-3_S21_L002_Contig1452
IFM047_S10_Contig1647,SFM-10_S1_L001_Contig2351,SXC2_S4_L001_Contig1878	Cluster-10.482	4.332	-1.635	1.526	-1.072	0.284	0.455	IFM047_S10_Contig1647,SFM-10_S1_L001_Contig2351,SXC2_S4_L001_Contig1878
IFM050_S11_Contig3309	Cluster-10.795	2.111	-1.357	1.265	-1.073	0.283	0.455	IFM050_S11_Contig3309
SXC2_S4_L001_Contig1912	Cluster-10.844	1.228	1.433	1.334	1.075	0.283	0.455	SXC2_S4_L001_Contig1912
IFM058_S13_Contig882,IFM26_S8_Contig449	Cluster-10.911	0.672	-2.098	1.951	-1.075	0.282	0.455	IFM058_S13_Contig882,IFM26_S8_Contig449
IFM12_S16_Contig833,SFC13_S23_L002_Contig2716	Cluster-10.757	1.473	-2.129	1.995	-1.067	0.286	0.456	IFM12_S16_Contig833,SFC13_S23_L002_Contig2716
SFU-3_S21_L002_20373_soapGraphK41,IFM047_S10_Contig1615	Cluster-10.73	0.74	-2.204	2.069	-1.065	0.287	0.457	SFU-3_S21_L002_20373_soapGraphK41,IFM047_S10_Contig1615
SXC2_S4_L001_Contig1819,SFM-10_S1_L001_Contig2542	Cluster-10.856	2.833	-1.862	1.755	-1.061	0.289	0.459	SXC2_S4_L001_Contig1819,SFM-10_S1_L001_Contig2542
SFM-10_S1_L001_Contig1320,IFM21_S3_Contig581,IFM21_S3_Contig808,IFM21_S3_2347_soapGraphK61	Cluster-10.442	1.547	-1.893	1.796	-1.054	0.292	0.462	SFM-10_S1_L001_Contig1320,IFM21_S3_Contig581,IFM21_S3_Contig808,IFM21_S3_2347_soapGraphK61
IFM050_S11_Contig3383	Cluster-10.733	1.399	-1.139	1.086	-1.049	0.294	0.465	IFM050_S11_Contig3383
IFM050_S11_Contig3734	Cluster-10.338	1.641	-1.191	1.149	-1.037	0.3	0.471	IFM050_S11_Contig3734
SFC17_S7_L001_Contig2011,SFC17_S7_L001_9158_soapGraphK51	Cluster-10.493	3.08	-2.231	2.15	-1.038	0.299	0.471	SFC17_S7_L001_Contig2011,SFC17_S7_L001_9158_soapGraphK51
SFU-3_S21_L002_Contig1048,SFU-3_S21_L002_Contig1117,SFU-3_S21_L002_Contig990,SFU-3_S21_L002_Contig2013,SFC14_S17_L001_Contig2402,SFU-3_S21_L002_Contig1778,SFU-3_S21_L002_Contig643	Cluster-10.794	0.677	2.135	2.064	1.035	0.301	0.471	SFU-3_S21_L002_Contig1048,SFU-3_S21_L002_Contig1117,SFU-3_S21_L002_Contig990,SFU-3_S21_L002_Contig2013,SFC14_S17_L001_Contig2402,SFU-3_S21_L002_Contig1778,SFU-3_S21_L002_Contig643
IFM050_S11_Contig3704	Cluster-285.0	1.271	-2.256	2.18	-1.035	0.301	0.471	IFM050_S11_Contig3704
IFD8_S2_Contig879	Cluster-10.731	156.588	0.759	0.741	1.025	0.306	0.477	IFD8_S2_Contig879
IFM27_S9_Contig618,IFM27_S9_Contig152,SFC16_S6_L001_Contig1789,IFM53_S14_L001_Contig2639,IFM53_S14_L001_Contig2118,SFM-1_S11_L001_5068_soapGraphK61,SFM-1_S11_L001_Contig726	Cluster-10.447	59.319	-0.74	0.729	-1.015	0.31	0.483	IFM27_S9_Contig618,IFM27_S9_Contig152,SFC16_S6_L001_Contig1789,IFM53_S14_L001_Contig2639,IFM53_S14_L001_Contig2118,SFM-1_S11_L001_5068_soapGraphK61,SFM-1_S11_L001_Contig726
IFM050_S11_Contig2683,IFM26_S8_Contig648	Cluster-10.1078	2.08	-1.339	1.334	-1.003	0.316	0.491	IFM050_S11_Contig2683,IFM26_S8_Contig648
SFC15-CM_S29_L002_Contig1951	Cluster-10.847	1.446	-1.414	1.412	-1.001	0.317	0.492	SFC15-CM_S29_L002_Contig1951
SFM-3_S12_L001_5334_soapGraphK61,SFC15-CM_S29_L002_Contig980	Cluster-10.301	21.089	-1.496	1.504	-0.994	0.32	0.493	SFM-3_S12_L001_5334_soapGraphK61,SFC15-CM_S29_L002_Contig980
SFC13_S23_L002_Contig2119	Cluster-10.327	1.537	1.204	1.216	0.99	0.322	0.493	SFC13_S23_L002_Contig2119
IFM050_S11_8338_soapGraphK61	Cluster-10.377	5.152	-1.018	1.022	-0.997	0.319	0.493	IFM050_S11_8338_soapGraphK61
SFM-3_S12_L001_Contig1721,IFM-049_S6_Contig37960,SFC13_S23_L002_6362_soapGraphK61,SFC15-CM_S29_L002_Contig1740,IFM047_S10_Contig1658,SFC13_S23_L002_Contig2706,SFC17_S7_L001_Contig1955,IFM061_S15_Contig985,IFM-049_S6_Contig32901,IFM-049_S6_Contig32449,SFC13_S23_L002_Contig2147,SFM-10_S1_L001_Contig1261,SFC13_S23_L002_Contig2129,SXC2_S4_L001_Contig1809,SFM-3_S12_L001_Contig1452,SFC22_S9_L001_Contig…	Cluster-10.593	60.405	-0.827	0.835	-0.99	0.322	0.493	SFM-3_S12_L001_Contig1721,IFM-049_S6_Contig37960,SFC13_S23_L002_6362_soapGraphK61,SFC15-CM_S29_L002_Contig1740,IFM047_S10_Contig1658,SFC13_S23_L002_Contig2706,SFC17_S7_L001_Contig1955,IFM061_S15_Contig985,IFM-049_S6_Contig32901,IFM-049_S6_Contig32449,SFC13_S23_L002_Contig2147,SFM-10_S1_L001_Contig1261,SFC13_S23_L002_Contig2129,SXC2_S4_L001_Contig1809,SFM-3_S12_L001_Contig1452,SFC22_S9_L001_Contig…
SFC15-CM_S29_L002_Contig1483	Cluster-10.1069	1.222	-1.632	1.644	-0.993	0.321	0.493	SFC15-CM_S29_L002_Contig1483
SFM-8_S8_L001_Contig3541,SFM-8_S8_L001_15673_soapGraphK51,SFC22_S9_L001_Contig3207	Cluster-10.1080	4.186	1.467	1.475	0.994	0.32	0.493	SFM-8_S8_L001_Contig3541,SFM-8_S8_L001_15673_soapGraphK51,SFC22_S9_L001_Contig3207
IFM050_S11_7424_soapGraphK61	Cluster-10.272	1.656	-1.798	1.819	-0.988	0.323	0.494	IFM050_S11_7424_soapGraphK61
SFU2_S5_L001_Contig458,IFC63_S16_L001_Contig1912,IFM061_S15_Contig977,IFM061_S15_Contig754,SXC2_S4_L001_Contig1004	Cluster-10.1142	4.84	-1.637	1.662	-0.985	0.324	0.495	SFU2_S5_L001_Contig458,IFC63_S16_L001_Contig1912,IFM061_S15_Contig977,IFM061_S15_Contig754,SXC2_S4_L001_Contig1004
SFM-10_S1_L001_Contig2497,SFC19_S24_L002_Contig1541,SFC15-CM_S29_L002_Contig1931,IFM12_S16_Contig495,SFC16_S6_L001_Contig1784,IFM26_S8_Contig650,SFC16_S6_L001_Contig1066,SFM-10_S1_L001_Contig1858,SFM-10_S1_L001_Contig2565,IFM21_S3_Contig1022,IFM21_S3_Contig631,SFC15-CM_S29_L002_Contig1922,SXC2_S4_L001_Contig1041,IFM21_S3_Contig949	Cluster-10.1096	27.333	-1.14	1.162	-0.981	0.326	0.496	SFM-10_S1_L001_Contig2497,SFC19_S24_L002_Contig1541,SFC15-CM_S29_L002_Contig1931,IFM12_S16_Contig495,SFC16_S6_L001_Contig1784,IFM26_S8_Contig650,SFC16_S6_L001_Contig1066,SFM-10_S1_L001_Contig1858,SFM-10_S1_L001_Contig2565,IFM21_S3_Contig1022,IFM21_S3_Contig631,SFC15-CM_S29_L002_Contig1922,SXC2_S4_L001_Contig1041,IFM21_S3_Contig949
SFC16_S6_L001_4433_soapGraphK61	Cluster-10.1119	3.049	-1.919	1.956	-0.981	0.326	0.496	SFC16_S6_L001_4433_soapGraphK61
IFM050_S11_Contig2306	Cluster-10.547	16.59	-0.799	0.818	-0.978	0.328	0.497	IFM050_S11_Contig2306
SFU2_S5_L001_Contig982	Cluster-10.614	1.555	-2.141	2.205	-0.971	0.332	0.501	SFU2_S5_L001_Contig982
SFU2_S5_L001_Contig1429,IFM24_S5_Contig812,IFM53_S14_L001_Contig2715,IFM21_S3_Contig775,IFC63_S16_L001_Contig2081,IFM061_S15_Contig889	Cluster-10.527	10.664	-1.916	1.986	-0.964	0.335	0.505	SFU2_S5_L001_Contig1429,IFM24_S5_Contig812,IFM53_S14_L001_Contig2715,IFM21_S3_Contig775,IFC63_S16_L001_Contig2081,IFM061_S15_Contig889
SFC22_S9_L001_Contig3133	Cluster-10.467	1.318	-1.179	1.228	-0.96	0.337	0.507	SFC22_S9_L001_Contig3133
SFM-1_S11_L001_Contig1170	Cluster-10.628	1.476	-1.246	1.302	-0.958	0.338	0.508	SFM-1_S11_L001_Contig1170
SFC17_S7_L001_Contig2015	Cluster-10.653	1.263	-1.699	1.777	-0.956	0.339	0.508	SFC17_S7_L001_Contig2015
SFU2_S5_L001_Contig1000	Cluster-10.344	1.515	-2.166	2.288	-0.947	0.344	0.513	SFU2_S5_L001_Contig1000
SFC17_S7_L001_Contig1379	Cluster-10.504	1.061	-1.537	1.625	-0.945	0.344	0.513	SFC17_S7_L001_Contig1379
IFM27_S9_Contig360,SFC15-CM_S29_L002_Contig1946,IFC66_S31_L002_Contig1436	Cluster-10.509	3.013	-0.729	0.772	-0.944	0.345	0.513	IFM27_S9_Contig360,SFC15-CM_S29_L002_Contig1946,IFC66_S31_L002_Contig1436
SFC13_S23_L002_Contig2746,IFM058_S13_Contig1016,IFM058_S13_Contig590,SFM-3_S12_L001_Contig2003	Cluster-10.702	3.434	1.289	1.367	0.943	0.346	0.513	SFC13_S23_L002_Contig2746,IFM058_S13_Contig1016,IFM058_S13_Contig590,SFM-3_S12_L001_Contig2003
SFM-6_S3_L001_Contig1998	Cluster-10.136	0.789	1.579	1.686	0.936	0.349	0.516	SFM-6_S3_L001_Contig1998
SFC17_S7_L001_Contig1961	Cluster-10.464	1.101	-1.199	1.292	-0.928	0.354	0.516	SFC17_S7_L001_Contig1961
SFU2_S5_L001_25417_soapGraphK21	Cluster-10.494	2.562	-1.437	1.547	-0.929	0.353	0.516	SFU2_S5_L001_25417_soapGraphK21
IFM050_S11_Contig2121	Cluster-10.585	1.081	-1.827	1.969	-0.928	0.353	0.516	IFM050_S11_Contig2121
SFC16_S6_L001_Contig987,SFM-6_S3_L001_Contig651,SFC16_S6_L001_4213_soapGraphK61	Cluster-10.835	1.483	1.538	1.654	0.93	0.352	0.516	SFC16_S6_L001_Contig987,SFM-6_S3_L001_Contig651,SFC16_S6_L001_4213_soapGraphK61
IFM-049_S6_Contig37911	Cluster-10.1143	0.686	-1.366	1.471	-0.929	0.353	0.516	IFM-049_S6_Contig37911
SFM-7_S13_L001_Contig1988	Cluster-237.0	1.538	-1.77	1.905	-0.929	0.353	0.516	SFM-7_S13_L001_Contig1988
SFC13_S23_L002_Contig1770,IFM21_S3_Contig299	Cluster-311.0	1.029	-1.75	1.877	-0.932	0.351	0.516	SFC13_S23_L002_Contig1770,IFM21_S3_Contig299
SFU2_S5_L001_Contig1077,IFM061_S15_Contig718	Cluster-10.618	1.519	-0.94	1.017	-0.924	0.355	0.517	SFU2_S5_L001_Contig1077,IFM061_S15_Contig718
SFU2_S5_L001_Contig1723,SFC-18_S20_L002_Contig1140,SFC17_S7_L001_Contig1017,SFM-10_S1_L001_Contig1386,SFC17_S7_L001_Contig1816,SFC17_S7_L001_Contig920,SFC17_S7_L001_Contig1942,SFC17_S7_L001_Contig1916	Cluster-10.1007	6.576	1.455	1.576	0.923	0.356	0.517	SFU2_S5_L001_Contig1723,SFC-18_S20_L002_Contig1140,SFC17_S7_L001_Contig1017,SFM-10_S1_L001_Contig1386,SFC17_S7_L001_Contig1816,SFC17_S7_L001_Contig920,SFC17_S7_L001_Contig1942,SFC17_S7_L001_Contig1916
SFM-8_S8_L001_Contig3492,SFC16_S6_L001_Contig862,IFM21_S3_Contig1049	Cluster-10.6	3.689	-1.435	1.563	-0.918	0.359	0.52	SFM-8_S8_L001_Contig3492,SFC16_S6_L001_Contig862,IFM21_S3_Contig1049
SFC19_S24_L002_21682_soapGraphK31	Cluster-10.3	9.159	-1.262	1.395	-0.905	0.366	0.526	SFC19_S24_L002_21682_soapGraphK31
IFM23_S4_Contig476,IFM21_S3_Contig898,SFM-10_S1_L001_Contig1805,SXC2_S4_L001_Contig1681,IFM047_S10_Contig1178	Cluster-10.866	4.829	-1.464	1.616	-0.906	0.365	0.526	IFM23_S4_Contig476,IFM21_S3_Contig898,SFM-10_S1_L001_Contig1805,SXC2_S4_L001_Contig1681,IFM047_S10_Contig1178
IFM27_S9_Contig606,SFC-18_S20_L002_Contig1147	Cluster-10.899	1.468	-1.821	2.007	-0.908	0.364	0.526	IFM27_S9_Contig606,SFC-18_S20_L002_Contig1147
SFC-18_S20_L002_Contig522,SFC19_S24_L002_Contig1568,IFM050_S11_Contig2209,SFC13_S23_L002_Contig1031,SFM-8_S8_L001_Contig1618,SXC2_S4_L001_Contig1824,IFM047_S10_Contig1247,IFC66_S31_L002_Contig536,IFM57_S30_L002_Contig990,SFU-3_S21_L002_Contig1060	Cluster-10.969	5.227	0.66	0.728	0.907	0.364	0.526	SFC-18_S20_L002_Contig522,SFC19_S24_L002_Contig1568,IFM050_S11_Contig2209,SFC13_S23_L002_Contig1031,SFM-8_S8_L001_Contig1618,SXC2_S4_L001_Contig1824,IFM047_S10_Contig1247,IFC66_S31_L002_Contig536,IFM57_S30_L002_Contig990,SFU-3_S21_L002_Contig1060
IFM050_S11_Contig3269	Cluster-10.94	0.87	-2.055	2.301	-0.893	0.372	0.533	IFM050_S11_Contig3269
SFC19_S24_L002_Contig1567,SFC19_S24_L002_Contig1549,SFM-3_S12_L001_Contig1995,SFC13_S23_L002_Contig1448,IFD6_S1_Contig556,SXC2_S4_L001_Contig1696,SXC2_S4_L001_Contig1690,SXC2_S4_L001_4732_soapGraphK61,SFM-3_S12_L001_Contig972	Cluster-10.138	15.946	1.262	1.43	0.883	0.377	0.54	SFC19_S24_L002_Contig1567,SFC19_S24_L002_Contig1549,SFM-3_S12_L001_Contig1995,SFC13_S23_L002_Contig1448,IFD6_S1_Contig556,SXC2_S4_L001_Contig1696,SXC2_S4_L001_Contig1690,SXC2_S4_L001_4732_soapGraphK61,SFM-3_S12_L001_Contig972
IFM054_S12_Contig384,SFC19_S24_L002_Contig2093,IFM047_S10_Contig1665,IFM054_S12_Contig727,IFM058_S13_Contig455,IFM21_S3_Contig630,SFM-10_S1_L001_Contig1859,IFM21_S3_Contig761,IFM24_S5_Contig538,IFM21_S3_17922_soapGraphK31,IFM061_S15_Contig912,IFM-049_S6_Contig30193,IFM054_S12_Contig1000,IFM-049_S6_Contig32809,IFM054_S12_Contig527,IFM21_S3_Contig359,IFM21_S3_Contig339,IFM21_S3_Contig388,SFU2_S5_L0…	Cluster-10.471	104.745	-1.124	1.28	-0.878	0.38	0.543	IFM054_S12_Contig384,SFC19_S24_L002_Contig2093,IFM047_S10_Contig1665,IFM054_S12_Contig727,IFM058_S13_Contig455,IFM21_S3_Contig630,SFM-10_S1_L001_Contig1859,IFM21_S3_Contig761,IFM24_S5_Contig538,IFM21_S3_17922_soapGraphK31,IFM061_S15_Contig912,IFM-049_S6_Contig30193,IFM054_S12_Contig1000,IFM-049_S6_Contig32809,IFM054_S12_Contig527,IFM21_S3_Contig359,IFM21_S3_Contig339,IFM21_S3_Contig388,SFU2_S5_L0…
SFC-18_S20_L002_Contig1104	Cluster-10.779	1.79	-1.933	2.216	-0.872	0.383	0.546	SFC-18_S20_L002_Contig1104
SFC14_S17_L001_Contig2159,SFC14_S17_L001_6049_soapGraphK61,SFM-7_S13_L001_Contig2133,SFU-3_S21_L002_Contig1981,IFM12_S16_Contig829,SFC17_S7_L001_15084_soapGraphK41	Cluster-10.1133	4.964	-1.406	1.615	-0.871	0.384	0.546	SFC14_S17_L001_Contig2159,SFC14_S17_L001_6049_soapGraphK61,SFM-7_S13_L001_Contig2133,SFU-3_S21_L002_Contig1981,IFM12_S16_Contig829,SFC17_S7_L001_15084_soapGraphK41
SFM-8_S8_L001_Contig1719,SFM-8_S8_L001_Contig3485,IFM058_S13_Contig1105	Cluster-10.635	3.107	-0.752	0.866	-0.869	0.385	0.547	SFM-8_S8_L001_Contig1719,SFM-8_S8_L001_Contig3485,IFM058_S13_Contig1105
SFM-3_S12_L001_Contig294,SFC13_S23_L002_Contig2151	Cluster-293.0	0.751	1.685	1.969	0.856	0.392	0.556	SFM-3_S12_L001_Contig294,SFC13_S23_L002_Contig2151
SFC-21_S22_L002_Contig2603,IFM058_S13_Contig663	Cluster-10.120	3.307	-0.803	0.945	-0.85	0.396	0.557	SFC-21_S22_L002_Contig2603,IFM058_S13_Contig663
IFC66_S31_L002_Contig1015,IFC66_S31_L002_Contig1861	Cluster-10.625	2.71	-1.135	1.335	-0.85	0.395	0.557	IFC66_S31_L002_Contig1015,IFC66_S31_L002_Contig1861
SFC15-CM_S29_L002_Contig1058,IFM061_S15_Contig505,SFC13_S23_L002_Contig1773,IFM047_S10_Contig1233,IFM-049_S6_Contig15457,SFC22_S9_L001_Contig3126,SFM-10_S1_L001_Contig2228,SFC22_S9_L001_Contig2835,SFM-8_S8_L001_Contig3562,IFM57_S30_L002_Contig589,IFM57_S30_L002_23591_soapGraphK21,IFM058_S13_Contig683,SFC15-CM_S29_L002_Contig637,IFM26_S8_Contig191,SFC17_S7_L001_Contig1984,SFM-7_S13_L001_Contig2095	Cluster-10.1033	20.299	-0.68	0.799	-0.851	0.395	0.557	SFC15-CM_S29_L002_Contig1058,IFM061_S15_Contig505,SFC13_S23_L002_Contig1773,IFM047_S10_Contig1233,IFM-049_S6_Contig15457,SFC22_S9_L001_Contig3126,SFM-10_S1_L001_Contig2228,SFC22_S9_L001_Contig2835,SFM-8_S8_L001_Contig3562,IFM57_S30_L002_Contig589,IFM57_S30_L002_23591_soapGraphK21,IFM058_S13_Contig683,SFC15-CM_S29_L002_Contig637,IFM26_S8_Contig191,SFC17_S7_L001_Contig1984,SFM-7_S13_L001_Contig2095
SFM-7_S13_L001_Contig2142	Cluster-10.119	2.004	1.645	1.946	0.845	0.398	0.559	SFM-7_S13_L001_Contig2142
IFM-049_S6_Contig40957	Cluster-10.253	4.997	-1.614	1.928	-0.837	0.402	0.564	IFM-049_S6_Contig40957
SFM-1_S11_L001_Contig1880	Cluster-330.0	1.455	-1.509	1.803	-0.837	0.403	0.564	SFM-1_S11_L001_Contig1880
IFM061_S15_Contig920,IFM21_S3_Contig781,SFM-1_S11_L001_Contig1881,SFM-1_S11_L001_5026_soapGraphK61,SFU2_S5_L001_Contig1888,IFC63_S16_L001_Contig2029,SFC22_S9_L001_Contig3178	Cluster-10.838	3.216	-1.55	1.863	-0.832	0.405	0.566	IFM061_S15_Contig920,IFM21_S3_Contig781,SFM-1_S11_L001_Contig1881,SFM-1_S11_L001_5026_soapGraphK61,SFU2_S5_L001_Contig1888,IFC63_S16_L001_Contig2029,SFC22_S9_L001_Contig3178
IFM058_S13_Contig373,IFC66_S31_L002_Contig1562,SFC13_S23_L002_Contig2153,SFC22_S9_L001_Contig2566,IFC66_S31_L002_Contig680,IFM050_S11_Contig3750	Cluster-10.900	7.067	-0.707	0.85	-0.831	0.406	0.566	IFM058_S13_Contig373,IFC66_S31_L002_Contig1562,SFC13_S23_L002_Contig2153,SFC22_S9_L001_Contig2566,IFC66_S31_L002_Contig680,IFM050_S11_Contig3750
SFC22_S9_L001_Contig2826,SFM-8_S8_L001_16143_soapGraphK51,SFC22_S9_L001_8802_soapGraphK61,IFM57_S30_L002_Contig1721,SFC22_S9_L001_Contig2688,SFC22_S9_L001_Contig2385,SFM-8_S8_L001_Contig3591,SFC22_S9_L001_Contig2293,SFM-8_S8_L001_Contig2507	Cluster-10.792	24.27	0.775	0.942	0.823	0.41	0.571	SFC22_S9_L001_Contig2826,SFM-8_S8_L001_16143_soapGraphK51,SFC22_S9_L001_8802_soapGraphK61,IFM57_S30_L002_Contig1721,SFC22_S9_L001_Contig2688,SFC22_S9_L001_Contig2385,SFM-8_S8_L001_Contig3591,SFC22_S9_L001_Contig2293,SFM-8_S8_L001_Contig2507
IFD6_S1_Contig157,IFD6_S1_Contig482,IFD6_S1_Contig353,IFD6_S1_Contig712,IFM050_S11_Contig3446,IFM050_S11_8384_soapGraphK61,IFM058_S13_Contig866	Cluster-10.620	9.076	-1.023	1.246	-0.821	0.412	0.572	IFD6_S1_Contig157,IFD6_S1_Contig482,IFD6_S1_Contig353,IFD6_S1_Contig712,IFM050_S11_Contig3446,IFM050_S11_8384_soapGraphK61,IFM058_S13_Contig866
IFM21_S3_Contig911	Cluster-174.0	1.694	-1.412	1.727	-0.818	0.414	0.573	IFM21_S3_Contig911
SFM-7_S13_L001_Contig1893	Cluster-10.370	8.533	0.997	1.231	0.81	0.418	0.578	SFM-7_S13_L001_Contig1893
SFU2_S5_L001_4712_soapGraphK61,SFM-10_S1_L001_Contig2546,IFC63_S16_L001_Contig1915,IFM21_S3_Contig78,IFM061_S15_Contig555,IFM24_S5_Contig920,IFM061_S15_Contig998,SFC15-CM_S29_L002_Contig594,SFM-7_S13_L001_Contig2091,SFU2_S5_L001_Contig1707,SFC15-CM_S29_L002_Contig1472,SFC14_S17_L001_Contig1023,SXC2_S4_L001_Contig1894,SFC14_S17_L001_Contig2165,IFM26_S8_Contig432,IFM12_S16_Contig533,IFM12_S16_3249_…	Cluster-10.1052	157.233	-0.984	1.219	-0.808	0.419	0.579	SFU2_S5_L001_4712_soapGraphK61,SFM-10_S1_L001_Contig2546,IFC63_S16_L001_Contig1915,IFM21_S3_Contig78,IFM061_S15_Contig555,IFM24_S5_Contig920,IFM061_S15_Contig998,SFC15-CM_S29_L002_Contig594,SFM-7_S13_L001_Contig2091,SFU2_S5_L001_Contig1707,SFC15-CM_S29_L002_Contig1472,SFC14_S17_L001_Contig1023,SXC2_S4_L001_Contig1894,SFC14_S17_L001_Contig2165,IFM26_S8_Contig432,IFM12_S16_Contig533,IFM12_S16_3249_…
SFC17_S7_L001_Contig2002	Cluster-10.458	0.663	-1.486	1.854	-0.802	0.423	0.581	SFC17_S7_L001_Contig2002
SFM-3_S12_L001_Contig1987,SFC13_S23_L002_Contig2710,IFM57_S30_L002_7215_soapGraphK51,IFM57_S30_L002_Contig1690,SFC13_S23_L002_Contig2755,IFM57_S30_L002_Contig1714,IFM57_S30_L002_4402_soapGraphK61	Cluster-10.1085	10.798	1.228	1.532	0.802	0.423	0.581	SFM-3_S12_L001_Contig1987,SFC13_S23_L002_Contig2710,IFM57_S30_L002_7215_soapGraphK51,IFM57_S30_L002_Contig1690,SFC13_S23_L002_Contig2755,IFM57_S30_L002_Contig1714,IFM57_S30_L002_4402_soapGraphK61
IFM27_S9_Contig524	Cluster-10.41	0.763	-1.168	1.508	-0.775	0.438	0.6	IFM27_S9_Contig524
SXC2_S4_L001_Contig1697,SXC2_S4_L001_4690_soapGraphK61,SFC17_S7_L001_Contig1733	Cluster-10.770	0.859	1.613	2.087	0.773	0.44	0.6	SXC2_S4_L001_Contig1697,SXC2_S4_L001_4690_soapGraphK61,SFC17_S7_L001_Contig1733
IFC63_S16_L001_Contig1621,SFM-8_S8_L001_Contig1304,IFM27_S9_Contig417,IFM21_S3_Contig137,SFM-10_S1_L001_Contig1308,IFM061_S15_Contig751,IFC66_S31_L002_Contig1853,IFM27_S9_Contig607,IFM12_S16_Contig523,SFM-10_S1_L001_Contig1804,IFM12_S16_Contig363,IFM27_S9_Contig414	Cluster-10.1040	8.717	-1.228	1.588	-0.773	0.439	0.6	IFC63_S16_L001_Contig1621,SFM-8_S8_L001_Contig1304,IFM27_S9_Contig417,IFM21_S3_Contig137,SFM-10_S1_L001_Contig1308,IFM061_S15_Contig751,IFC66_S31_L002_Contig1853,IFM27_S9_Contig607,IFM12_S16_Contig523,SFM-10_S1_L001_Contig1804,IFM12_S16_Contig363,IFM27_S9_Contig414
SXC2_S4_L001_Contig1020,SFC13_S23_L002_Contig1971,SFM-3_S12_L001_Contig1468,SFM-10_S1_L001_Contig572,SFM-1_S11_L001_Contig1175,SFC13_S23_L002_Contig2560,SFM-3_S12_L001_Contig1866,SFM-10_S1_L001_Contig1816,SFM-1_S11_L001_Contig2089,SXC2_S4_L001_Contig773	Cluster-10.1043	8.699	1.403	1.812	0.775	0.439	0.6	SXC2_S4_L001_Contig1020,SFC13_S23_L002_Contig1971,SFM-3_S12_L001_Contig1468,SFM-10_S1_L001_Contig572,SFM-1_S11_L001_Contig1175,SFC13_S23_L002_Contig2560,SFM-3_S12_L001_Contig1866,SFM-10_S1_L001_Contig1816,SFM-1_S11_L001_Contig2089,SXC2_S4_L001_Contig773
SFM-10_S1_L001_18928_soapGraphK41,IFM061_S15_Contig876	Cluster-10.438	13.298	-0.499	0.656	-0.76	0.447	0.607	SFM-10_S1_L001_18928_soapGraphK41,IFM061_S15_Contig876
SFC-21_S22_L002_Contig2627,SFM-1_S11_L001_Contig2070,IFM12_S16_Contig222,SFU-3_S21_L002_Contig1888,SFU-3_S21_L002_Contig553,SFC14_S17_L001_Contig654,SFU-3_S21_L002_Contig1696,SFU-3_S21_L002_Contig582	Cluster-10.739	29.652	0.562	0.737	0.763	0.446	0.607	SFC-21_S22_L002_Contig2627,SFM-1_S11_L001_Contig2070,IFM12_S16_Contig222,SFU-3_S21_L002_Contig1888,SFU-3_S21_L002_Contig553,SFC14_S17_L001_Contig654,SFU-3_S21_L002_Contig1696,SFU-3_S21_L002_Contig582
IFM53_S14_L001_Contig1575,IFM26_S8_Contig275,SFC16_S6_L001_Contig1793,IFM53_S14_L001_Contig2633,SFM-10_S1_L001_Contig2581,IFM061_S15_Contig665,IFM061_S15_2294_soapGraphK61,IFC63_S16_L001_Contig1635,IFM061_S15_Contig753	Cluster-10.979	25.226	-0.952	1.254	-0.759	0.448	0.607	IFM53_S14_L001_Contig1575,IFM26_S8_Contig275,SFC16_S6_L001_Contig1793,IFM53_S14_L001_Contig2633,SFM-10_S1_L001_Contig2581,IFM061_S15_Contig665,IFM061_S15_2294_soapGraphK61,IFC63_S16_L001_Contig1635,IFM061_S15_Contig753
IFM53_S14_L001_Contig1071,SFU-3_S21_L002_Contig1065,SFC14_S17_L001_Contig542,SFC14_S17_L001_Contig634,SFC14_S17_L001_Contig572	Cluster-10.964	5.144	0.956	1.266	0.755	0.45	0.609	IFM53_S14_L001_Contig1071,SFU-3_S21_L002_Contig1065,SFC14_S17_L001_Contig542,SFC14_S17_L001_Contig634,SFC14_S17_L001_Contig572
IFM047_S10_4192_soapGraphK61,IFM054_S12_2373_soapGraphK61,SXC2_S4_L001_Contig1393,IFM054_S12_Contig1001	Cluster-10.448	1.753	-1.58	2.114	-0.747	0.455	0.612	IFM047_S10_4192_soapGraphK61,IFM054_S12_2373_soapGraphK61,SXC2_S4_L001_Contig1393,IFM054_S12_Contig1001
IFM21_S3_Contig614,SFC15-CM_S29_L002_Contig1730	Cluster-10.956	6.239	-1.521	2.033	-0.748	0.454	0.612	IFM21_S3_Contig614,SFC15-CM_S29_L002_Contig1730
SFC-025_S33_L002_Contig1478,SFM-10_S1_L001_Contig1314,IFM24_S5_Contig830,IFM24_S5_2263_soapGraphK61,IFM21_S3_Contig946,IFM061_S15_Contig591,IFM53_S14_L001_Contig2120,IFM21_S3_Contig940,IFM061_S15_Contig909,SFC-18_S20_L002_Contig1451,IFM-049_S6_Contig40249	Cluster-10.1073	12.146	-0.76	1.016	-0.749	0.454	0.612	SFC-025_S33_L002_Contig1478,SFM-10_S1_L001_Contig1314,IFM24_S5_Contig830,IFM24_S5_2263_soapGraphK61,IFM21_S3_Contig946,IFM061_S15_Contig591,IFM53_S14_L001_Contig2120,IFM21_S3_Contig940,IFM061_S15_Contig909,SFC-18_S20_L002_Contig1451,IFM-049_S6_Contig40249
SFU2_S5_L001_Contig1467,IFM061_S15_Contig990	Cluster-10.199	2.033	-1.301	1.763	-0.738	0.461	0.615	SFU2_S5_L001_Contig1467,IFM061_S15_Contig990
IFM047_S10_Contig76,SFC22_S9_L001_Contig3225	Cluster-10.582	1.893	-1.422	1.925	-0.739	0.46	0.615	IFM047_S10_Contig76,SFC22_S9_L001_Contig3225
SFC22_S9_L001_Contig3109	Cluster-10.633	0.685	-1.176	1.587	-0.741	0.459	0.615	SFC22_S9_L001_Contig3109
IFC66_S31_L002_Contig938	Cluster-10.1177	2.022	-0.546	0.739	-0.739	0.46	0.615	IFC66_S31_L002_Contig938
IFM047_S10_Contig878,IFM27_S9_Contig624,IFD8_S2_Contig1047,SFM-7_S13_L001_Contig1497	Cluster-10.701	2.211	-1.566	2.135	-0.733	0.463	0.617	IFM047_S10_Contig878,IFM27_S9_Contig624,IFD8_S2_Contig1047,SFM-7_S13_L001_Contig1497
IFM23_S4_Contig486,IFC66_S31_L002_Contig590,SFM-6_S3_L001_Contig1750	Cluster-10.241	49.371	-0.539	0.744	-0.724	0.469	0.619	IFM23_S4_Contig486,IFC66_S31_L002_Contig590,SFM-6_S3_L001_Contig1750
IFM23_S4_15108_soapGraphK21,IFM23_S4_Contig698	Cluster-10.845	13.128	-1	1.37	-0.73	0.465	0.619	IFM23_S4_15108_soapGraphK21,IFM23_S4_Contig698
IFM058_S13_Contig821	Cluster-10.944	2.303	-0.826	1.139	-0.725	0.468	0.619	IFM058_S13_Contig821
IFM12_S16_Contig217,SFC17_S7_L001_Contig536,IFM050_S11_Contig414,SFC-18_S20_L002_Contig1146,IFM57_S30_L002_Contig564,SFM-7_S13_L001_Contig1870,SFC16_S6_L001_7346_soapGraphK51,SFC16_S6_L001_Contig1050,SFM-1_S11_L001_Contig1581,SXC2_S4_L001_Contig658	Cluster-10.953	13.997	0.528	0.727	0.726	0.468	0.619	IFM12_S16_Contig217,SFC17_S7_L001_Contig536,IFM050_S11_Contig414,SFC-18_S20_L002_Contig1146,IFM57_S30_L002_Contig564,SFM-7_S13_L001_Contig1870,SFC16_S6_L001_7346_soapGraphK51,SFC16_S6_L001_Contig1050,SFM-1_S11_L001_Contig1581,SXC2_S4_L001_Contig658
IFC66_S31_L002_Contig952	Cluster-331.0	1.865	-0.678	0.932	-0.727	0.467	0.619	IFC66_S31_L002_Contig952
SFC14_S17_L001_Contig1720,SFM-3_S12_L001_Contig1979,SFC13_S23_L002_Contig2440,SFC-18_S20_L002_Contig1456	Cluster-10.9	0.971	1.497	2.09	0.716	0.474	0.62	SFC14_S17_L001_Contig1720,SFM-3_S12_L001_Contig1979,SFC13_S23_L002_Contig2440,SFC-18_S20_L002_Contig1456
SFC22_S9_L001_Contig738	Cluster-10.945	1.087	-0.907	1.267	-0.716	0.474	0.62	SFC22_S9_L001_Contig738
IFM054_S12_Contig545,IFM047_S10_Contig1213,SFC14_S17_L001_Contig294	Cluster-10.965	3.227	1.401	1.958	0.715	0.474	0.62	IFM054_S12_Contig545,IFM047_S10_Contig1213,SFC14_S17_L001_Contig294
SFC22_S9_L001_Contig1879,SFM-8_S8_L001_Contig3522	Cluster-10.1011	3.631	1.363	1.902	0.717	0.474	0.62	SFC22_S9_L001_Contig1879,SFM-8_S8_L001_Contig3522
IFM050_S11_Contig3431,SFM-3_S12_L001_Contig1460,SFC19_S24_L002_Contig719,IFM050_S11_Contig3726,IFM050_S11_Contig2130,IFM050_S11_Contig3739,IFM050_S11_Contig3759,IFM050_S11_Contig3421,IFM050_S11_8368_soapGraphK61,IFM050_S11_Contig2834,SFM-3_S12_L001_Contig1075	Cluster-10.1083	12.764	1.031	1.439	0.716	0.474	0.62	IFM050_S11_Contig3431,SFM-3_S12_L001_Contig1460,SFC19_S24_L002_Contig719,IFM050_S11_Contig3726,IFM050_S11_Contig2130,IFM050_S11_Contig3739,IFM050_S11_Contig3759,IFM050_S11_Contig3421,IFM050_S11_8368_soapGraphK61,IFM050_S11_Contig2834,SFM-3_S12_L001_Contig1075
SXC2_S4_L001_Contig1891,SFM-6_S3_L001_Contig806,SFM-10_S1_L001_Contig2203,SFU2_S5_L001_Contig1447,SFC15-CM_S29_L002_Contig1962,IFM12_S16_Contig839,IFM12_S16_Contig849,IFM21_S3_Contig944,SFC15-CM_S29_L002_8149_soapGraphK51,SFM-6_S3_L001_Contig1740,SFM-6_S3_L001_Contig1431,IFD6_S1_Contig687,SXC2_S4_L001_Contig1429,IFM058_S13_Contig1082,IFM058_S13_Contig473,SFM-5_S2_L001_Contig1392,IFD8_S2_Contig110…	Cluster-10.881	84.603	-0.791	1.113	-0.711	0.477	0.622	SXC2_S4_L001_Contig1891,SFM-6_S3_L001_Contig806,SFM-10_S1_L001_Contig2203,SFU2_S5_L001_Contig1447,SFC15-CM_S29_L002_Contig1962,IFM12_S16_Contig839,IFM12_S16_Contig849,IFM21_S3_Contig944,SFC15-CM_S29_L002_8149_soapGraphK51,SFM-6_S3_L001_Contig1740,SFM-6_S3_L001_Contig1431,IFD6_S1_Contig687,SXC2_S4_L001_Contig1429,IFM058_S13_Contig1082,IFM058_S13_Contig473,SFM-5_S2_L001_Contig1392,IFD8_S2_Contig110…
IFM058_S13_Contig470	Cluster-10.759	2.363	-1.507	2.148	-0.702	0.483	0.629	IFM058_S13_Contig470
SFC17_S7_L001_Contig2013,SFM-6_S3_L001_Contig1084,SFM-7_S13_L001_Contig2140,SFM-6_S3_L001_Contig847,IFC66_S31_L002_Contig1854	Cluster-10.793	1.058	1.602	2.295	0.698	0.485	0.63	SFC17_S7_L001_Contig2013,SFM-6_S3_L001_Contig1084,SFM-7_S13_L001_Contig2140,SFM-6_S3_L001_Contig847,IFC66_S31_L002_Contig1854
SFC-18_S20_L002_Contig1137	Cluster-10.1141	1.35	0.947	1.365	0.693	0.488	0.633	SFC-18_S20_L002_Contig1137
IFC66_S31_L002_Contig1706,IFM061_S15_Contig752	Cluster-10.381	4.242	-1.009	1.461	-0.691	0.49	0.634	IFC66_S31_L002_Contig1706,IFM061_S15_Contig752
IFM058_S13_Contig988,IFM058_S13_Contig682,IFM57_S30_L002_Contig377	Cluster-10.315	11.607	-0.58	0.882	-0.657	0.511	0.655	IFM058_S13_Contig988,IFM058_S13_Contig682,IFM57_S30_L002_Contig377
SFM-1_S11_L001_Contig2100	Cluster-10.388	1.304	-1.125	1.722	-0.653	0.514	0.655	SFM-1_S11_L001_Contig2100
IFM27_S9_Contig582,IFD8_S2_Contig793,SFM-7_S13_L001_Contig1535,IFD8_S2_Contig762,IFM27_S9_Contig530,IFM047_S10_9078_soapGraphK51,IFM27_S9_1664_soapGraphK61,IFM047_S10_Contig1666,SFC17_S7_L001_Contig990	Cluster-10.408	1.16	1.357	2.096	0.647	0.517	0.655	IFM27_S9_Contig582,IFD8_S2_Contig793,SFM-7_S13_L001_Contig1535,IFD8_S2_Contig762,IFM27_S9_Contig530,IFM047_S10_9078_soapGraphK51,IFM27_S9_1664_soapGraphK61,IFM047_S10_Contig1666,SFC17_S7_L001_Contig990
SFM-3_S12_L001_Contig1959,SFC19_S24_L002_Contig1073,SFM-1_S11_L001_Contig1136,IFC63_S16_L001_4712_soapGraphK61,IFM061_S15_Contig883	Cluster-10.437	7.376	-0.618	0.952	-0.649	0.516	0.655	SFM-3_S12_L001_Contig1959,SFC19_S24_L002_Contig1073,SFM-1_S11_L001_Contig1136,IFC63_S16_L001_4712_soapGraphK61,IFM061_S15_Contig883
SFC-18_S20_L002_Contig1720,SFC-18_S20_L002_4664_soapGraphK61,IFM14_S7_Contig293	Cluster-10.490	3.572	-1.322	2.01	-0.657	0.511	0.655	SFC-18_S20_L002_Contig1720,SFC-18_S20_L002_4664_soapGraphK61,IFM14_S7_Contig293
IFM24_S5_Contig918,SFM-10_S1_L001_Contig1849,SFU2_S5_L001_Contig1715,SFU2_S5_L001_4636_soapGraphK61,IFC63_S16_L001_Contig1656	Cluster-10.617	12.09	-0.808	1.23	-0.657	0.511	0.655	IFM24_S5_Contig918,SFM-10_S1_L001_Contig1849,SFU2_S5_L001_Contig1715,SFU2_S5_L001_4636_soapGraphK61,IFC63_S16_L001_Contig1656
SFU-3_S21_L002_Contig2017,SFC14_S17_L001_Contig2171	Cluster-10.1002	2.257	-1.272	1.939	-0.656	0.512	0.655	SFU-3_S21_L002_Contig2017,SFC14_S17_L001_Contig2171
SFM-5_S2_L001_Contig2409,SFM-8_S8_L001_Contig3569,IFM058_S13_Contig1035,SFM-5_S2_L001_Contig2389,SFM-8_S8_L001_Contig3527	Cluster-10.1028	3.376	1.074	1.621	0.663	0.508	0.655	SFM-5_S2_L001_Contig2409,SFM-8_S8_L001_Contig3569,IFM058_S13_Contig1035,SFM-5_S2_L001_Contig2389,SFM-8_S8_L001_Contig3527
SFU-3_S21_L002_Contig1028	Cluster-10.1113	0.772	-1.487	2.297	-0.647	0.517	0.655	SFU-3_S21_L002_Contig1028
SFC22_S9_L001_Contig3166	Cluster-10.1144	5.545	-0.557	0.863	-0.646	0.518	0.655	SFC22_S9_L001_Contig3166
IFM21_S3_Contig609	Cluster-10.1183	1.425	-1.124	1.732	-0.649	0.516	0.655	IFM21_S3_Contig609
SFM-3_S12_L001_Contig1977	Cluster-10.1184	1.407	-0.875	1.346	-0.65	0.516	0.655	SFM-3_S12_L001_Contig1977
IFC66_S31_L002_Contig863	Cluster-299.0	1.227	-0.725	1.116	-0.649	0.516	0.655	IFC66_S31_L002_Contig863
IFM12_S16_Contig541,SFM-1_S11_L001_Contig808	Cluster-10.777	2.152	-0.9	1.405	-0.64	0.522	0.658	IFM12_S16_Contig541,SFM-1_S11_L001_Contig808
SFC22_S9_L001_Contig3050	Cluster-10.619	0.787	-0.827	1.297	-0.638	0.524	0.659	SFC22_S9_L001_Contig3050
SFC17_S7_L001_Contig2024	Cluster-10.321	0.839	-1.12	1.79	-0.626	0.531	0.666	SFC17_S7_L001_Contig2024
IFM27_S9_Contig377,IFM21_S3_Contig482,IFC66_S31_L002_Contig1533	Cluster-10.1104	1.76	-0.984	1.57	-0.627	0.531	0.666	IFM27_S9_Contig377,IFM21_S3_Contig482,IFC66_S31_L002_Contig1533
SFM-1_S11_L001_Contig778	Cluster-10.824	1.133	-1.177	1.892	-0.622	0.534	0.667	SFM-1_S11_L001_Contig778
SFC13_S23_L002_Contig987,SFM-3_S12_L001_Contig638	Cluster-10.967	3.543	-0.777	1.248	-0.623	0.534	0.667	SFC13_S23_L002_Contig987,SFM-3_S12_L001_Contig638
SXC2_S4_L001_Contig1695,IFC66_S31_L002_Contig1814,SFM-1_S11_L001_Contig1200,SFC17_S7_L001_Contig1960	Cluster-10.1029	5.138	-1.207	1.946	-0.62	0.535	0.668	SXC2_S4_L001_Contig1695,IFC66_S31_L002_Contig1814,SFM-1_S11_L001_Contig1200,SFC17_S7_L001_Contig1960
SFM-1_S11_L001_Contig1885,SFC17_S7_L001_5573_soapGraphK61,SFC17_S7_L001_Contig1751	Cluster-10.1	2.836	0.754	1.222	0.617	0.538	0.669	SFM-1_S11_L001_Contig1885,SFC17_S7_L001_5573_soapGraphK61,SFC17_S7_L001_Contig1751
IFD6_S1_Contig948	Cluster-10.446	3.049	1.267	2.072	0.611	0.541	0.672	IFD6_S1_Contig948
SFC22_S9_L001_Contig3206,IFM57_S30_L002_Contig828,SFM-8_S8_L001_Contig2500,SFC13_S23_L002_Contig1509	Cluster-10.640	1.358	1.19	1.991	0.597	0.55	0.681	SFC22_S9_L001_Contig3206,IFM57_S30_L002_Contig828,SFM-8_S8_L001_Contig2500,SFC13_S23_L002_Contig1509
SFM-6_S3_L001_Contig1741	Cluster-10.858	2.692	-1.068	1.785	-0.598	0.55	0.681	SFM-6_S3_L001_Contig1741
SXC2_S4_L001_Contig1693,IFM-049_S6_Contig18495,IFM058_S13_Contig1075,IFM058_S13_Contig1013,SFM-1_S11_L001_Contig1167	Cluster-10.108	3.109	-1.126	1.892	-0.595	0.552	0.682	SXC2_S4_L001_Contig1693,IFM-049_S6_Contig18495,IFM058_S13_Contig1075,IFM058_S13_Contig1013,SFM-1_S11_L001_Contig1167
SFC-21_S22_L002_Contig2137,SFM-3_S12_L001_Contig1766	Cluster-10.756	24.238	0.764	1.292	0.591	0.555	0.684	SFC-21_S22_L002_Contig2137,SFM-3_S12_L001_Contig1766
SXC2_S4_L001_Contig1389,SFM-3_S12_L001_Contig1748,SFC13_S23_L002_Contig1680	Cluster-10.20	1.054	1.209	2.062	0.587	0.558	0.687	SXC2_S4_L001_Contig1389,SFM-3_S12_L001_Contig1748,SFC13_S23_L002_Contig1680
IFM26_S8_Contig636,IFM050_S11_Contig3786,IFM26_S8_Contig194,IFM26_S8_Contig339,IFM050_S11_Contig2310	Cluster-10.786	25.177	-0.364	0.634	-0.574	0.566	0.694	IFM26_S8_Contig636,IFM050_S11_Contig3786,IFM26_S8_Contig194,IFM26_S8_Contig339,IFM050_S11_Contig2310
SFC22_S9_L001_Contig3228,SFC-21_S22_L002_Contig896,SFC-21_S22_L002_Contig2690,IFM57_S30_L002_Contig850,SFC-21_S22_L002_Contig57	Cluster-10.1091	2.541	0.917	1.596	0.575	0.566	0.694	SFC22_S9_L001_Contig3228,SFC-21_S22_L002_Contig896,SFC-21_S22_L002_Contig2690,IFM57_S30_L002_Contig850,SFC-21_S22_L002_Contig57
SFM-7_S13_L001_Contig1895	Cluster-10.815	1.418	1.182	2.115	0.559	0.576	0.706	SFM-7_S13_L001_Contig1895
SFC22_S9_L001_Contig3151,SFM-8_S8_L001_10450_soapGraphK61,SFM-8_S8_L001_Contig3147,SFC22_S9_L001_Contig2315	Cluster-10.1038	1.551	1.216	2.223	0.547	0.584	0.715	SFC22_S9_L001_Contig3151,SFM-8_S8_L001_10450_soapGraphK61,SFM-8_S8_L001_Contig3147,SFC22_S9_L001_Contig2315
SFM-1_S11_L001_Contig1618,SFM-1_S11_L001_5120_soapGraphK61	Cluster-10.181	0.939	1.07	1.965	0.544	0.586	0.716	SFM-1_S11_L001_Contig1618,SFM-1_S11_L001_5120_soapGraphK61
SFC22_S9_L001_Contig2270	Cluster-10.645	1.497	0.718	1.326	0.542	0.588	0.716	SFC22_S9_L001_Contig2270
SFM-6_S3_L001_Contig975,SFC16_S6_L001_Contig888,SFM-6_S3_L001_Contig2027,SFC-18_S20_L002_Contig1114,IFM26_S8_Contig329	Cluster-10.949	5.564	0.893	1.653	0.54	0.589	0.716	SFM-6_S3_L001_Contig975,SFC16_S6_L001_Contig888,SFM-6_S3_L001_Contig2027,SFC-18_S20_L002_Contig1114,IFM26_S8_Contig329
IFM054_S12_Contig881	Cluster-10.941	0.698	-0.944	1.761	-0.536	0.592	0.718	IFM054_S12_Contig881
SFC17_S7_L001_Contig2020	Cluster-10.308	2.09	0.936	1.766	0.53	0.596	0.722	SFC17_S7_L001_Contig2020
IFM061_S15_Contig423,SFU2_S5_L001_Contig1473,SFM-10_S1_L001_Contig2259	Cluster-10.391	1.324	-0.914	1.726	-0.53	0.596	0.722	IFM061_S15_Contig423,SFU2_S5_L001_Contig1473,SFM-10_S1_L001_Contig2259
SFM-3_S12_L001_Contig2005,SFC13_S23_L002_Contig1375,IFM57_S30_L002_Contig1719,IFM57_S30_L002_Contig1020	Cluster-10.849	30.049	-0.279	0.545	-0.512	0.609	0.735	SFM-3_S12_L001_Contig2005,SFC13_S23_L002_Contig1375,IFM57_S30_L002_Contig1719,IFM57_S30_L002_Contig1020
SFC17_S7_L001_Contig1015	Cluster-10.58	1.15	1.071	2.11	0.508	0.612	0.736	SFC17_S7_L001_Contig1015
SFC-023_S32_L002_Contig894,SFC-18_S20_L002_Contig1870,SFC-18_S20_L002_Contig1471,IFM14_S7_Contig210,SFC-18_S20_L002_Contig1721	Cluster-10.474	6.544	0.674	1.324	0.51	0.61	0.736	SFC-023_S32_L002_Contig894,SFC-18_S20_L002_Contig1870,SFC-18_S20_L002_Contig1471,IFM14_S7_Contig210,SFC-18_S20_L002_Contig1721
IFC66_S31_L002_Contig1583	Cluster-10.183	0.791	0.987	1.981	0.498	0.618	0.743	IFC66_S31_L002_Contig1583
SFC14_S17_L001_Contig2169,SFC14_S17_L001_6217_soapGraphK61,SFC14_S17_L001_Contig2172	Cluster-10.60	2.202	-0.759	1.562	-0.486	0.627	0.752	SFC14_S17_L001_Contig2169,SFC14_S17_L001_6217_soapGraphK61,SFC14_S17_L001_Contig2172
SFM-7_S13_L001_Contig1426	Cluster-10.306	0.987	-0.624	1.302	-0.479	0.632	0.756	SFM-7_S13_L001_Contig1426
SXC2_S4_L001_Contig1911,SFC14_S17_L001_Contig2411	Cluster-10.828	48.55	-0.605	1.263	-0.479	0.632	0.756	SXC2_S4_L001_Contig1911,SFC14_S17_L001_Contig2411
SFU-3_S21_L002_Contig1467,SFC15-CM_S29_L002_Contig1721,SFC15-CM_S29_L002_4619_soapGraphK61	Cluster-10.931	26.624	0.627	1.315	0.477	0.633	0.756	SFU-3_S21_L002_Contig1467,SFC15-CM_S29_L002_Contig1721,SFC15-CM_S29_L002_4619_soapGraphK61
SFC17_S7_L001_Contig2018,IFM050_S11_Contig3534,IFM050_S11_Contig3444	Cluster-10.530	2.081	-0.595	1.265	-0.47	0.638	0.759	SFC17_S7_L001_Contig2018,IFM050_S11_Contig3534,IFM050_S11_Contig3444
IFM054_S12_Contig1084,IFM047_S10_Contig1583	Cluster-10.968	2.307	0.802	1.7	0.472	0.637	0.759	IFM054_S12_Contig1084,IFM047_S10_Contig1583
SFC16_S6_L001_Contig1783,SFC-023_S32_L002_Contig1156,IFM27_S9_Contig328,IFM57_S30_L002_Contig995,SFC-18_S20_L002_Contig1443,SFC22_S9_L001_Contig3205,SFC16_S6_L001_Contig333	Cluster-10.98	4.018	0.772	1.664	0.464	0.643	0.763	SFC16_S6_L001_Contig1783,SFC-023_S32_L002_Contig1156,IFM27_S9_Contig328,IFM57_S30_L002_Contig995,SFC-18_S20_L002_Contig1443,SFC22_S9_L001_Contig3205,SFC16_S6_L001_Contig333
SFC22_S9_L001_Contig2804,SFC22_S9_L001_Contig2329,SFM-7_S13_L001_Contig2144,SFM-6_S3_L001_Contig1470,SXC2_S4_L001_Contig1906,SFC22_S9_L001_Contig1631,SFM-6_S3_L001_Contig457,SXC2_S4_L001_Contig1909,SFM-6_S3_L001_Contig2016	Cluster-10.1000	2.682	-0.856	1.893	-0.452	0.651	0.771	SFC22_S9_L001_Contig2804,SFC22_S9_L001_Contig2329,SFM-7_S13_L001_Contig2144,SFM-6_S3_L001_Contig1470,SXC2_S4_L001_Contig1906,SFC22_S9_L001_Contig1631,SFM-6_S3_L001_Contig457,SXC2_S4_L001_Contig1909,SFM-6_S3_L001_Contig2016
IFM058_S13_Contig1034,SXC2_S4_L001_Contig1899,IFM23_S4_Contig427	Cluster-10.780	1.244	0.901	2.009	0.449	0.654	0.773	IFM058_S13_Contig1034,SXC2_S4_L001_Contig1899,IFM23_S4_Contig427
IFM058_S13_Contig575,SXC2_S4_L001_Contig1006	Cluster-10.1138	0.661	0.946	2.143	0.442	0.659	0.778	IFM058_S13_Contig575,SXC2_S4_L001_Contig1006
SFC13_S23_L002_Contig2098,IFM12_S16_Contig517,IFM12_S16_Contig538	Cluster-10.1153	2.005	-0.851	1.957	-0.435	0.664	0.781	SFC13_S23_L002_Contig2098,IFM12_S16_Contig517,IFM12_S16_Contig538
SFM-10_S1_L001_Contig1807,SFC15-CM_S29_L002_Contig1967	Cluster-271.1	1.478	0.88	2.025	0.434	0.664	0.781	SFM-10_S1_L001_Contig1807,SFC15-CM_S29_L002_Contig1967
IFM21_S3_Contig545	Cluster-10.418	0.875	-0.762	1.77	-0.43	0.667	0.783	IFM21_S3_Contig545
IFM050_S11_Contig2917	Cluster-10.411	1.43	-0.516	1.236	-0.418	0.676	0.793	IFM050_S11_Contig2917
SFC-21_S22_L002_Contig2498	Cluster-10.808	2.986	-0.498	1.203	-0.414	0.679	0.795	SFC-21_S22_L002_Contig2498
IFM27_S9_Contig317	Cluster-10.1111	1.625	-0.371	0.912	-0.407	0.684	0.798	IFM27_S9_Contig317
SFM-8_S8_L001_Contig3139,IFM57_S30_L002_Contig892	Cluster-10.1139	0.683	0.711	1.746	0.407	0.684	0.798	SFM-8_S8_L001_Contig3139,IFM57_S30_L002_Contig892
SFC17_S7_L001_5661_soapGraphK61,SFC17_S7_L001_Contig1745	Cluster-10.385	6.547	0.686	1.697	0.404	0.686	0.799	SFC17_S7_L001_5661_soapGraphK61,SFC17_S7_L001_Contig1745
SFM-3_S12_L001_Contig457	Cluster-10.677	1.707	0.54	1.349	0.401	0.689	0.801	SFM-3_S12_L001_Contig457
SFC14_S17_L001_Contig2125,SFU-3_S21_L002_Contig1057,IFC66_S31_L002_Contig1565,SFC14_S17_L001_Contig1763,SFU-3_S21_L002_Contig1066,IFM058_S13_Contig883,IFC66_S31_L002_Contig1858,SFU-3_S21_L002_5577_soapGraphK61,IFM058_S13_2385_soapGraphK61,SFC14_S17_L001_Contig2179	Cluster-10.18	2.644	0.681	1.744	0.391	0.696	0.807	SFC14_S17_L001_Contig2125,SFU-3_S21_L002_Contig1057,IFC66_S31_L002_Contig1565,SFC14_S17_L001_Contig1763,SFU-3_S21_L002_Contig1066,IFM058_S13_Contig883,IFC66_S31_L002_Contig1858,SFU-3_S21_L002_5577_soapGraphK61,IFM058_S13_2385_soapGraphK61,SFC14_S17_L001_Contig2179
SFM-8_S8_L001_Contig3607,SFC22_S9_L001_Contig2847	Cluster-10.875	0.944	0.897	2.291	0.391	0.696	0.807	SFM-8_S8_L001_Contig3607,SFC22_S9_L001_Contig2847
SFM-7_S13_L001_Contig2139	Cluster-10.891	2.635	-0.412	1.081	-0.381	0.703	0.81	SFM-7_S13_L001_Contig2139
IFM050_S11_Contig3657,SFC13_S23_L002_Contig2739,IFC66_S31_L002_Contig1807,IFM26_S8_Contig531	Cluster-10.1097	9.846	-0.355	0.924	-0.384	0.701	0.81	IFM050_S11_Contig3657,SFC13_S23_L002_Contig2739,IFC66_S31_L002_Contig1807,IFM26_S8_Contig531
SFC17_S7_L001_Contig1988,SFC16_S6_L001_Contig1628,SFM-7_S13_L001_Contig1885,SFM-7_S13_L001_5156_soapGraphK61,SFM-8_S8_L001_Contig1321,SFM-5_S2_L001_Contig2446,SFC-18_S20_L002_4590_soapGraphK61,IFM058_S13_Contig860,SFC-18_S20_L002_Contig1718,IFM12_S16_Contig666,SFM-6_S3_L001_Contig1973,IFM050_S11_Contig3741,SFC19_S24_L002_Contig1847,SFC15-CM_S29_L002_4795_soapGraphK61,SFC15-CM_S29_L002_Contig1743,…	Cluster-10.1129	91.647	-0.137	0.357	-0.383	0.701	0.81	SFC17_S7_L001_Contig1988,SFC16_S6_L001_Contig1628,SFM-7_S13_L001_Contig1885,SFM-7_S13_L001_5156_soapGraphK61,SFM-8_S8_L001_Contig1321,SFM-5_S2_L001_Contig2446,SFC-18_S20_L002_4590_soapGraphK61,IFM058_S13_Contig860,SFC-18_S20_L002_Contig1718,IFM12_S16_Contig666,SFM-6_S3_L001_Contig1973,IFM050_S11_Contig3741,SFC19_S24_L002_Contig1847,SFC15-CM_S29_L002_4795_soapGraphK61,SFC15-CM_S29_L002_Contig1743,…
SFM-3_S12_L001_21083_soapGraphK31	Cluster-10.865	1.884	0.459	1.215	0.377	0.706	0.812	SFM-3_S12_L001_21083_soapGraphK31
SFM-10_S1_L001_Contig237,SFM-1_S11_L001_Contig2093,IFM14_S7_Contig378	Cluster-10.818	0.834	0.677	1.905	0.355	0.722	0.83	SFM-10_S1_L001_Contig237,SFM-1_S11_L001_Contig2093,IFM14_S7_Contig378
SFM-3_S12_L001_Contig1674,IFM26_S8_Contig436,SFC13_S23_L002_Contig1588,SFC13_S23_L002_Contig2743	Cluster-10.354	2.112	0.575	1.682	0.342	0.732	0.84	SFM-3_S12_L001_Contig1674,IFM26_S8_Contig436,SFC13_S23_L002_Contig1588,SFC13_S23_L002_Contig2743
SFM-3_S12_L001_Contig1406,SFC13_S23_L002_Contig2750	Cluster-10.916	1.21	0.482	1.417	0.34	0.734	0.84	SFM-3_S12_L001_Contig1406,SFC13_S23_L002_Contig2750
SFC17_S7_L001_Contig1939	Cluster-312.0	0.869	0.57	1.704	0.335	0.738	0.844	SFC17_S7_L001_Contig1939
SFC19_S24_L002_9706_soapGraphK51,SFM-6_S3_L001_Contig608,SFC19_S24_L002_16177_soapGraphK41,SFC19_S24_L002_Contig2080,SFC19_S24_L002_Contig1850	Cluster-10.225	1.383	0.539	1.652	0.326	0.744	0.85	SFC19_S24_L002_9706_soapGraphK51,SFM-6_S3_L001_Contig608,SFC19_S24_L002_16177_soapGraphK41,SFC19_S24_L002_Contig2080,SFC19_S24_L002_Contig1850
IFM-049_S6_439514_soapGraphK21,SFM-8_S8_L001_Contig3016,SFM-5_S2_L001_Contig1387,SFM-6_S3_L001_Contig674,IFM21_S3_Contig355,SFC14_S17_L001_Contig1152,IFM53_S14_L001_Contig2718,IFD8_S2_Contig164,SFC17_S7_L001_Contig1000,SFC15-CM_S29_L002_Contig1968,IFM12_S16_3101_soapGraphK61,SFM-10_S1_L001_Contig1384,SFC19_S24_L002_Contig710,SFU2_S5_L001_Contig1103,IFM054_S12_Contig502,IFM058_S13_2347_soapGraphK6…	Cluster-10.785	46.811	-0.242	0.758	-0.318	0.75	0.853	IFM-049_S6_439514_soapGraphK21,SFM-8_S8_L001_Contig3016,SFM-5_S2_L001_Contig1387,SFM-6_S3_L001_Contig674,IFM21_S3_Contig355,SFC14_S17_L001_Contig1152,IFM53_S14_L001_Contig2718,IFD8_S2_Contig164,SFC17_S7_L001_Contig1000,SFC15-CM_S29_L002_Contig1968,IFM12_S16_3101_soapGraphK61,SFM-10_S1_L001_Contig1384,SFC19_S24_L002_Contig710,SFU2_S5_L001_Contig1103,IFM054_S12_Contig502,IFM058_S13_2347_soapGraphK6…
IFM058_S13_Contig639,SFM-5_S2_L001_Contig1929,IFM058_S13_18971_soapGraphK31,IFM058_S13_Contig857,SFC15-CM_S29_L002_Contig1943,SFC13_S23_L002_Contig2077,SXC2_S4_L001_Contig1905,SFC13_S23_L002_Contig2459,SFC19_S24_L002_Contig1153,IFM12_S16_Contig845,SFC15-CM_S29_L002_Contig1976,IFM058_S13_Contig794,SFM-3_S12_L001_Contig960,IFM058_S13_Contig348,SXC2_S4_L001_Contig1013,IFM12_S16_Contig847	Cluster-10.898	25.94	0.32	1	0.32	0.749	0.853	IFM058_S13_Contig639,SFM-5_S2_L001_Contig1929,IFM058_S13_18971_soapGraphK31,IFM058_S13_Contig857,SFC15-CM_S29_L002_Contig1943,SFC13_S23_L002_Contig2077,SXC2_S4_L001_Contig1905,SFC13_S23_L002_Contig2459,SFC19_S24_L002_Contig1153,IFM12_S16_Contig845,SFC15-CM_S29_L002_Contig1976,IFM058_S13_Contig794,SFM-3_S12_L001_Contig960,IFM058_S13_Contig348,SXC2_S4_L001_Contig1013,IFM12_S16_Contig847
SFM-10_S1_L001_Contig719,IFM53_S14_L001_Contig1129,IFM061_S15_Contig554,IFM054_S12_Contig1078,SFC14_S17_L001_Contig1776,SFC13_S23_L002_Contig283,SFC14_S17_L001_Contig2097,SFC14_S17_L001_Contig2155,SFC14_S17_L001_Contig1182,SFM-8_S8_L001_Contig1646,IFM047_S10_Contig638,IFM054_S12_Contig1072,IFM047_S10_4260_soapGraphK61,SFC14_S17_L001_Contig1755,SFM-10_S1_L001_Contig2253,SFM-3_S12_L001_Contig616,IF…	Cluster-10.995	122.77	0.349	1.108	0.315	0.753	0.854	SFM-10_S1_L001_Contig719,IFM53_S14_L001_Contig1129,IFM061_S15_Contig554,IFM054_S12_Contig1078,SFC14_S17_L001_Contig1776,SFC13_S23_L002_Contig283,SFC14_S17_L001_Contig2097,SFC14_S17_L001_Contig2155,SFC14_S17_L001_Contig1182,SFM-8_S8_L001_Contig1646,IFM047_S10_Contig638,IFM054_S12_Contig1072,IFM047_S10_4260_soapGraphK61,SFC14_S17_L001_Contig1755,SFM-10_S1_L001_Contig2253,SFM-3_S12_L001_Contig616,IF…
SFM-8_S8_L001_Contig2904	Cluster-182.0	0.775	-0.559	1.777	-0.314	0.753	0.854	SFM-8_S8_L001_Contig2904
SFC-18_S20_L002_Contig1143	Cluster-10.736	0.72	0.638	2.084	0.306	0.76	0.86	SFC-18_S20_L002_Contig1143
SFC22_S9_L001_Contig3022	Cluster-10.810	0.712	-0.604	1.986	-0.304	0.761	0.86	SFC22_S9_L001_Contig3022
SFU2_S5_L001_Contig1791,SFC13_S23_L002_Contig1801	Cluster-10.128	3.141	-0.378	1.275	-0.296	0.767	0.864	SFU2_S5_L001_Contig1791,SFC13_S23_L002_Contig1801
SFC16_S6_L001_Contig505,IFM054_S12_Contig650	Cluster-10.137	0.933	0.589	1.99	0.296	0.767	0.864	SFC16_S6_L001_Contig505,IFM054_S12_Contig650
SFC22_S9_L001_8364_soapGraphK61,SFM-8_S8_L001_Contig3021,IFM57_S30_L002_13897_soapGraphK41,SFC22_S9_L001_13325_soapGraphK51,SFC22_S9_L001_Contig2312	Cluster-10.1030	1.239	-0.407	1.393	-0.292	0.77	0.865	SFC22_S9_L001_8364_soapGraphK61,SFM-8_S8_L001_Contig3021,IFM57_S30_L002_13897_soapGraphK41,SFC22_S9_L001_13325_soapGraphK51,SFC22_S9_L001_Contig2312
SFC13_S23_L002_Contig227,IFM21_S3_Contig600	Cluster-336.0	1.488	-0.413	1.409	-0.293	0.769	0.865	SFC13_S23_L002_Contig227,IFM21_S3_Contig600
SFM-1_S11_L001_Contig1611,SFM-1_S11_L001_5096_soapGraphK61	Cluster-10.906	2.735	0.258	0.895	0.289	0.773	0.866	SFM-1_S11_L001_Contig1611,SFM-1_S11_L001_5096_soapGraphK61
IFM050_S11_Contig2906	Cluster-10.796	6.486	0.326	1.143	0.285	0.775	0.868	IFM050_S11_Contig2906
SXC2_S4_L001_Contig1683,SXC2_S4_L001_4542_soapGraphK61,IFM23_S4_Contig645	Cluster-10.746	0.661	-0.636	2.297	-0.277	0.782	0.869	SXC2_S4_L001_Contig1683,SXC2_S4_L001_4542_soapGraphK61,IFM23_S4_Contig645
IFM23_S4_1698_soapGraphK61,IFM23_S4_Contig651,IFM23_S4_14972_soapGraphK21	Cluster-10.973	2.214	-0.38	1.367	-0.278	0.781	0.869	IFM23_S4_1698_soapGraphK61,IFM23_S4_Contig651,IFM23_S4_14972_soapGraphK21
IFD6_S1_Contig360,SFM-3_S12_L001_Contig652,SFM-3_S12_L001_Contig697,SFM-3_S12_L001_15187_soapGraphK41,SFC13_S23_L002_Contig2754,IFM57_S30_L002_Contig993,IFM57_S30_L002_Contig1552,IFM57_S30_L002_Contig1684,IFM57_S30_L002_Contig331	Cluster-10.1076	5.846	0.629	2.27	0.277	0.782	0.869	IFD6_S1_Contig360,SFM-3_S12_L001_Contig652,SFM-3_S12_L001_Contig697,SFM-3_S12_L001_15187_soapGraphK41,SFC13_S23_L002_Contig2754,IFM57_S30_L002_Contig993,IFM57_S30_L002_Contig1552,IFM57_S30_L002_Contig1684,IFM57_S30_L002_Contig331
SFM-1_S11_L001_Contig2073,IFM24_S5_Contig976,SFC19_S24_L002_Contig1837	Cluster-337.0	1.172	0.509	1.804	0.282	0.778	0.869	SFM-1_S11_L001_Contig2073,IFM24_S5_Contig976,SFC19_S24_L002_Contig1837
IFM56_S15_Contig1480,SXC2_S4_L001_Contig1021,SFC14_S17_L001_Contig1790,SFU-3_S21_L002_Contig2024,IFM26_S8_Contig217,SFC17_S7_L001_Contig2019,SFM-7_S13_L001_Contig2132,SFC14_S17_L001_Contig2405,SFC22_S9_L001_Contig907,IFM56_S15_Contig840,SFU-3_S21_L002_Contig1061,SFM-8_S8_L001_Contig847,IFM23_S4_Contig493	Cluster-10.666	32.916	-0.194	0.716	-0.271	0.786	0.873	IFM56_S15_Contig1480,SXC2_S4_L001_Contig1021,SFC14_S17_L001_Contig1790,SFU-3_S21_L002_Contig2024,IFM26_S8_Contig217,SFC17_S7_L001_Contig2019,SFM-7_S13_L001_Contig2132,SFC14_S17_L001_Contig2405,SFC22_S9_L001_Contig907,IFM56_S15_Contig840,SFU-3_S21_L002_Contig1061,SFM-8_S8_L001_Contig847,IFM23_S4_Contig493
SFC22_S9_L001_Contig2397,SFM-8_S8_L001_Contig3155,IFM57_S30_L002_Contig1312,IFM57_S30_L002_Contig1319,IFM57_S30_L002_23659_soapGraphK21	Cluster-10.317	1.975	0.229	0.881	0.26	0.795	0.876	SFC22_S9_L001_Contig2397,SFM-8_S8_L001_Contig3155,IFM57_S30_L002_Contig1312,IFM57_S30_L002_Contig1319,IFM57_S30_L002_23659_soapGraphK21
SFC22_S9_L001_Contig2834,SFC22_S9_L001_8676_soapGraphK61,SFM-3_S12_L001_Contig1178,SFC22_S9_L001_Contig3181,SFC13_S23_L002_Contig2134,SFC15-CM_S29_L002_Contig54,SFC15-CM_S29_L002_Contig1082	Cluster-10.343	0.744	0.573	2.207	0.26	0.795	0.876	SFC22_S9_L001_Contig2834,SFC22_S9_L001_8676_soapGraphK61,SFM-3_S12_L001_Contig1178,SFC22_S9_L001_Contig3181,SFC13_S23_L002_Contig2134,SFC15-CM_S29_L002_Contig54,SFC15-CM_S29_L002_Contig1082
IFC66_S31_L002_Contig1855	Cluster-10.390	1.117	-0.496	1.889	-0.263	0.793	0.876	IFC66_S31_L002_Contig1855
SFM-1_S11_L001_Contig2095	Cluster-10.776	14.392	0.226	0.866	0.261	0.794	0.876	SFM-1_S11_L001_Contig2095
IFM26_S8_Contig226,IFM058_S13_Contig57,SFC17_S7_L001_Contig418,IFM26_S8_Contig328,IFC66_S31_L002_Contig1844,SFC15-CM_S29_L002_Contig1014,IFD6_S1_Contig720,SFC22_S9_L001_Contig2380,IFM050_S11_Contig3720	Cluster-10.903	49.81	0.138	0.518	0.266	0.79	0.876	IFM26_S8_Contig226,IFM058_S13_Contig57,SFC17_S7_L001_Contig418,IFM26_S8_Contig328,IFC66_S31_L002_Contig1844,SFC15-CM_S29_L002_Contig1014,IFD6_S1_Contig720,SFC22_S9_L001_Contig2380,IFM050_S11_Contig3720
IFC66_S31_L002_Contig1572	Cluster-10.461	11.398	-0.2	0.839	-0.239	0.811	0.889	IFC66_S31_L002_Contig1572
SFC15-CM_S29_L002_Contig1739,IFM21_S3_Contig947	Cluster-10.957	2.09	-0.357	1.481	-0.241	0.81	0.889	SFC15-CM_S29_L002_Contig1739,IFM21_S3_Contig947
SFM-1_S11_L001_Contig1259,IFC63_S16_L001_Contig1278,SFC13_S23_L002_Contig1178,SFC19_S24_L002_Contig1562,IFM24_S5_Contig444	Cluster-10.1094	5.155	0.331	1.389	0.238	0.812	0.889	SFM-1_S11_L001_Contig1259,IFC63_S16_L001_Contig1278,SFC13_S23_L002_Contig1178,SFC19_S24_L002_Contig1562,IFM24_S5_Contig444
SFM-8_S8_L001_Contig3547,IFM57_S30_L002_Contig231	Cluster-10.713	0.905	0.521	2.29	0.228	0.82	0.897	SFM-8_S8_L001_Contig3547,IFM57_S30_L002_Contig231
SFC13_S23_L002_Contig2630	Cluster-10.219	1.027	-0.295	1.331	-0.221	0.825	0.901	SFC13_S23_L002_Contig2630
SFC-21_S22_L002_Contig2709,SFM-1_S11_L001_Contig2098	Cluster-10.220	25.711	-0.202	0.928	-0.218	0.828	0.903	SFC-21_S22_L002_Contig2709,SFM-1_S11_L001_Contig2098
SXC2_S4_L001_Contig1014	Cluster-10.771	0.974	0.45	2.106	0.214	0.831	0.903	SXC2_S4_L001_Contig1014
SFM-8_S8_L001_43484_soapGraphK21,IFM12_S16_Contig386,SFM-3_S12_L001_Contig1989,SFM-3_S12_L001_Contig1067,SFM-8_S8_L001_Contig1706,IFM12_S16_Contig28,SXC2_S4_L001_Contig1688,SXC2_S4_L001_Contig967,IFM12_S16_37302_soapGraphK21,SXC2_S4_L001_4428_soapGraphK61,IFC63_S16_L001_Contig2087,SFM-8_S8_L001_Contig2339,SFC22_S9_L001_Contig2845,SXC2_S4_L001_Contig1023,SFM-7_S13_L001_Contig2143,SFC15-CM_S29_L002…	Cluster-10.1179	125.448	-0.177	0.82	-0.216	0.829	0.903	SFM-8_S8_L001_43484_soapGraphK21,IFM12_S16_Contig386,SFM-3_S12_L001_Contig1989,SFM-3_S12_L001_Contig1067,SFM-8_S8_L001_Contig1706,IFM12_S16_Contig28,SXC2_S4_L001_Contig1688,SXC2_S4_L001_Contig967,IFM12_S16_37302_soapGraphK21,SXC2_S4_L001_4428_soapGraphK61,IFC63_S16_L001_Contig2087,SFM-8_S8_L001_Contig2339,SFC22_S9_L001_Contig2845,SXC2_S4_L001_Contig1023,SFM-7_S13_L001_Contig2143,SFC15-CM_S29_L002…
IFM53_S14_L001_Contig2114	Cluster-10.848	1.217	0.384	1.817	0.211	0.833	0.904	IFM53_S14_L001_Contig2114
SFM-10_S1_L001_7117_soapGraphK61,SFM-10_S1_L001_Contig2231,IFM27_S9_1778_soapGraphK61,IFM27_S9_Contig320,IFM21_S3_Contig790	Cluster-10.905	8.076	-0.397	1.929	-0.206	0.837	0.907	SFM-10_S1_L001_7117_soapGraphK61,SFM-10_S1_L001_Contig2231,IFM27_S9_1778_soapGraphK61,IFM27_S9_Contig320,IFM21_S3_Contig790
IFM27_S9_Contig202,IFM047_S10_Contig571,SFM-1_S11_L001_Contig413,SFU-3_S21_L002_Contig645	Cluster-10.274	1.035	-0.39	2.002	-0.195	0.846	0.909	IFM27_S9_Contig202,IFM047_S10_Contig571,SFM-1_S11_L001_Contig413,SFU-3_S21_L002_Contig645
SFU-3_S21_L002_5591_soapGraphK61,SFU-3_S21_L002_Contig1617	Cluster-10.410	4.606	0.451	2.27	0.199	0.842	0.909	SFU-3_S21_L002_5591_soapGraphK61,SFU-3_S21_L002_Contig1617
SFC17_S7_L001_Contig943,SFM-1_S11_L001_Contig1854,SFM-1_S11_L001_5124_soapGraphK61,SFM-1_S11_L001_Contig1228	Cluster-10.533	5.401	0.297	1.535	0.193	0.847	0.909	SFC17_S7_L001_Contig943,SFM-1_S11_L001_Contig1854,SFM-1_S11_L001_5124_soapGraphK61,SFM-1_S11_L001_Contig1228
SFM-6_S3_L001_Contig1991	Cluster-10.724	0.798	-0.386	1.99	-0.194	0.846	0.909	SFM-6_S3_L001_Contig1991
SFC15-CM_S29_L002_Contig976,SFM-6_S3_L001_Contig1734,SFM-10_S1_L001_Contig2252	Cluster-10.1116	2.991	-0.302	1.506	-0.201	0.841	0.909	SFC15-CM_S29_L002_Contig976,SFM-6_S3_L001_Contig1734,SFM-10_S1_L001_Contig2252
SFM-10_S1_L001_Contig2450,SFM-6_S3_L001_Contig611,SFM-5_S2_L001_Contig2432,SFM-5_S2_L001_Contig2559,SFM-6_S3_L001_Contig503,IFM058_S13_Contig1104,SFC-18_S20_L002_Contig1845,IFM12_S16_Contig544	Cluster-10.1120	18.542	-0.177	0.906	-0.196	0.845	0.909	SFM-10_S1_L001_Contig2450,SFM-6_S3_L001_Contig611,SFM-5_S2_L001_Contig2432,SFM-5_S2_L001_Contig2559,SFM-6_S3_L001_Contig503,IFM058_S13_Contig1104,SFC-18_S20_L002_Contig1845,IFM12_S16_Contig544
SFC-21_S22_L002_Contig2673	Cluster-10.829	1.616	-0.23	1.237	-0.186	0.852	0.913	SFC-21_S22_L002_Contig2673
SFM-7_S13_L001_Contig2103	Cluster-10.971	4.233	0.177	0.952	0.186	0.853	0.913	SFM-7_S13_L001_Contig2103
SFC15-CM_S29_L002_Contig1948,SFC13_S23_L002_Contig2633,IFM57_S30_L002_Contig1003,SFC15-CM_S29_L002_Contig1729,SFC15-CM_S29_L002_Contig1322	Cluster-10.238	2.649	-0.31	1.722	-0.18	0.857	0.916	SFC15-CM_S29_L002_Contig1948,SFC13_S23_L002_Contig2633,IFM57_S30_L002_Contig1003,SFC15-CM_S29_L002_Contig1729,SFC15-CM_S29_L002_Contig1322
SFM-5_S2_L001_5938_soapGraphK61,SFM-5_S2_L001_Contig2216,SFM-8_S8_L001_Contig3417,IFM058_S13_Contig1015,IFM57_S30_L002_Contig610	Cluster-10.654	4.002	-0.231	1.31	-0.176	0.86	0.918	SFM-5_S2_L001_5938_soapGraphK61,SFM-5_S2_L001_Contig2216,SFM-8_S8_L001_Contig3417,IFM058_S13_Contig1015,IFM57_S30_L002_Contig610
SFC14_S17_L001_Contig1228,SFC14_S17_L001_Contig1784,SFU-3_S21_L002_Contig886,SFC14_S17_L001_Contig2168,SFU-3_S21_L002_Contig1766,IFM12_S16_Contig821,SFU-3_S21_L002_Contig1470,SFC14_S17_L001_6225_soapGraphK61,SFC14_S17_L001_Contig2396,SFU-3_S21_L002_Contig1769,SFU-3_S21_L002_5473_soapGraphK61,SFC14_S17_L001_Contig2390,IFM12_S16_Contig832,SFC14_S17_L001_Contig2406,SFC14_S17_L001_Contig2177,SFC14_S1…	Cluster-10.768	0.844	0.342	2.008	0.17	0.865	0.918	SFC14_S17_L001_Contig1228,SFC14_S17_L001_Contig1784,SFU-3_S21_L002_Contig886,SFC14_S17_L001_Contig2168,SFU-3_S21_L002_Contig1766,IFM12_S16_Contig821,SFU-3_S21_L002_Contig1470,SFC14_S17_L001_6225_soapGraphK61,SFC14_S17_L001_Contig2396,SFU-3_S21_L002_Contig1769,SFU-3_S21_L002_5473_soapGraphK61,SFC14_S17_L001_Contig2390,IFM12_S16_Contig832,SFC14_S17_L001_Contig2406,SFC14_S17_L001_Contig2177,SFC14_S1…
SFC-18_S20_L002_Contig1886,IFM12_S16_Contig663,SFM-7_S13_L001_Contig1542,SFC15-CM_S29_L002_Contig1064,SFM-7_S13_L001_Contig974,IFC63_S16_L001_Contig2093,SFM-10_S1_L001_Contig207,SFU2_S5_L001_Contig1696,IFM061_S15_Contig992,IFM061_S15_Contig194,SFU2_S5_L001_Contig1100,SFC17_S7_L001_Contig2008,SFU2_S5_L001_Contig1090,IFM24_S5_Contig919,IFM21_S3_Contig764,SFC17_S7_L001_5477_soapGraphK61,IFM061_S15_C…	Cluster-10.814	19.842	-0.226	1.32	-0.171	0.864	0.918	SFC-18_S20_L002_Contig1886,IFM12_S16_Contig663,SFM-7_S13_L001_Contig1542,SFC15-CM_S29_L002_Contig1064,SFM-7_S13_L001_Contig974,IFC63_S16_L001_Contig2093,SFM-10_S1_L001_Contig207,SFU2_S5_L001_Contig1696,IFM061_S15_Contig992,IFM061_S15_Contig194,SFU2_S5_L001_Contig1100,SFC17_S7_L001_Contig2008,SFU2_S5_L001_Contig1090,IFM24_S5_Contig919,IFM21_S3_Contig764,SFC17_S7_L001_5477_soapGraphK61,IFM061_S15_C…
SFC-18_S20_L002_Contig1872,SFC16_S6_L001_Contig923,SFM-10_S1_L001_Contig958,IFM21_S3_Contig1028,IFM23_S4_Contig186,SFM-8_S8_L001_Contig226,SFM-6_S3_L001_Contig1969,SFM-1_S11_L001_Contig2052	Cluster-10.1166	16.092	-0.112	0.651	-0.172	0.864	0.918	SFC-18_S20_L002_Contig1872,SFC16_S6_L001_Contig923,SFM-10_S1_L001_Contig958,IFM21_S3_Contig1028,IFM23_S4_Contig186,SFM-8_S8_L001_Contig226,SFM-6_S3_L001_Contig1969,SFM-1_S11_L001_Contig2052
IFM-049_S6_Contig11103	Cluster-10.1082	0.726	-0.296	1.773	-0.167	0.867	0.92	IFM-049_S6_Contig11103
IFM27_S9_2991_soapGraphK51,IFM27_S9_Contig601	Cluster-10.1149	3.361	-0.162	0.989	-0.164	0.87	0.921	IFM27_S9_2991_soapGraphK51,IFM27_S9_Contig601
SFC13_S23_L002_Contig1174	Cluster-308.0	2.437	-0.144	0.912	-0.158	0.875	0.925	SFC13_S23_L002_Contig1174
IFC66_S31_L002_Contig1532,IFM047_S10_Contig1296	Cluster-308.1	1.754	-0.142	0.961	-0.147	0.883	0.932	IFC66_S31_L002_Contig1532,IFM047_S10_Contig1296
SFM-6_S3_L001_Contig1433	Cluster-10.827	1.721	0.283	2.036	0.139	0.89	0.937	SFM-6_S3_L001_Contig1433
SFC17_S7_L001_Contig1697,SFM-1_S11_L001_Contig2075,IFM060_S14_Contig385	Cluster-10.674	0.761	0.23	1.681	0.137	0.891	0.938	SFC17_S7_L001_Contig1697,SFM-1_S11_L001_Contig2075,IFM060_S14_Contig385
SFM-8_S8_L001_Contig3148,SFM-8_S8_L001_Contig3153,SFM-8_S8_L001_10544_soapGraphK61	Cluster-10.45	0.866	-0.26	2.1	-0.124	0.902	0.941	SFM-8_S8_L001_Contig3148,SFM-8_S8_L001_Contig3153,SFM-8_S8_L001_10544_soapGraphK61
SFM-1_S11_L001_Contig1233,SFU2_S5_L001_Contig1724,SFM-1_S11_L001_Contig230,SFM-1_S11_L001_Contig1585,SFM-1_S11_L001_Contig1869,SXC2_S4_L001_Contig1434,SFU2_S5_L001_Contig1885,SFU2_S5_L001_4650_soapGraphK61,SFM-1_S11_L001_Contig1966	Cluster-10.351	4.45	0.114	0.927	0.123	0.902	0.941	SFM-1_S11_L001_Contig1233,SFU2_S5_L001_Contig1724,SFM-1_S11_L001_Contig230,SFM-1_S11_L001_Contig1585,SFM-1_S11_L001_Contig1869,SXC2_S4_L001_Contig1434,SFU2_S5_L001_Contig1885,SFU2_S5_L001_4650_soapGraphK61,SFM-1_S11_L001_Contig1966
SFC-21_S22_L002_Contig1709,SFC19_S24_L002_Contig1844,SFC17_S7_L001_Contig1752,IFM050_S11_Contig3373,SFC17_S7_L001_5595_soapGraphK61	Cluster-10.374	2.674	-0.176	1.342	-0.131	0.896	0.941	SFC-21_S22_L002_Contig1709,SFC19_S24_L002_Contig1844,SFC17_S7_L001_Contig1752,IFM050_S11_Contig3373,SFC17_S7_L001_5595_soapGraphK61
IFM26_S8_Contig624	Cluster-10.753	1.176	0.254	2.115	0.12	0.904	0.941	IFM26_S8_Contig624
SFC22_S9_L001_Contig492,IFC66_S31_L002_Contig759,SFC22_S9_L001_Contig633,SFM-8_S8_L001_Contig2486	Cluster-10.826	2.195	0.235	1.843	0.128	0.898	0.941	SFC22_S9_L001_Contig492,IFC66_S31_L002_Contig759,SFC22_S9_L001_Contig633,SFM-8_S8_L001_Contig2486
IFM21_S3_Contig608,SFM-10_S1_L001_Contig1834,SFM-7_S13_L001_Contig2099,SFM-6_S3_L001_Contig1085,SFM-7_S13_L001_Contig1053,IFC63_S16_L001_Contig2092,IFM061_S15_Contig976,IFM061_S15_Contig599	Cluster-10.876	6.253	-0.15	1.236	-0.121	0.903	0.941	IFM21_S3_Contig608,SFM-10_S1_L001_Contig1834,SFM-7_S13_L001_Contig2099,SFM-6_S3_L001_Contig1085,SFM-7_S13_L001_Contig1053,IFC63_S16_L001_Contig2092,IFM061_S15_Contig976,IFM061_S15_Contig599
SFC22_S9_L001_Contig3214,IFM57_S30_L002_Contig1011,IFM57_S30_L002_23923_soapGraphK21	Cluster-10.1053	0.676	0.242	1.999	0.121	0.904	0.941	SFC22_S9_L001_Contig3214,IFM57_S30_L002_Contig1011,IFM57_S30_L002_23923_soapGraphK21
SFC19_S24_L002_26469_soapGraphK21	Cluster-10.420	9.775	0.19	1.623	0.117	0.907	0.942	SFC19_S24_L002_26469_soapGraphK21
SFM-10_S1_L001_Contig1064,IFM21_S3_Contig580,SFC17_S7_L001_Contig830	Cluster-10.332	20.268	0.186	1.635	0.113	0.91	0.944	SFM-10_S1_L001_Contig1064,IFM21_S3_Contig580,SFC17_S7_L001_Contig830
SFM-3_S12_L001_4925_soapGraphK61,SFC19_S24_L002_Contig2086,SFM-1_S11_L001_Contig2049,SFC13_S23_L002_6124_soapGraphK61	Cluster-10.434	3.848	-0.166	1.531	-0.108	0.914	0.946	SFM-3_S12_L001_4925_soapGraphK61,SFC19_S24_L002_Contig2086,SFM-1_S11_L001_Contig2049,SFC13_S23_L002_6124_soapGraphK61
SFC13_S23_L002_Contig2401,IFC66_S31_L002_Contig1784,IFM050_S11_Contig2853,IFM047_S10_Contig1422	Cluster-10.641	3.933	-0.097	0.934	-0.104	0.917	0.946	SFC13_S23_L002_Contig2401,IFC66_S31_L002_Contig1784,IFM050_S11_Contig2853,IFM047_S10_Contig1422
IFM57_S30_L002_Contig997,IFM57_S30_L002_Contig218,SFC22_S9_L001_Contig3220,SFM-8_S8_L001_Contig1727	Cluster-10.663	1.997	0.205	1.937	0.106	0.916	0.946	IFM57_S30_L002_Contig997,IFM57_S30_L002_Contig218,SFC22_S9_L001_Contig3220,SFM-8_S8_L001_Contig1727
SXC2_S4_L001_Contig1431,IFM058_S13_Contig1009,SFM-5_S2_L001_Contig1450,SFM-5_S2_L001_Contig1324,SFM-5_S2_L001_Contig1804,IFM27_S9_Contig491,SXC2_S4_L001_Contig1886,SXC2_S4_L001_Contig7,SFM-5_S2_L001_Contig2421	Cluster-10.934	16.488	-0.144	1.36	-0.106	0.916	0.946	SXC2_S4_L001_Contig1431,IFM058_S13_Contig1009,SFM-5_S2_L001_Contig1450,SFM-5_S2_L001_Contig1324,SFM-5_S2_L001_Contig1804,IFM27_S9_Contig491,SXC2_S4_L001_Contig1886,SXC2_S4_L001_Contig7,SFM-5_S2_L001_Contig2421
IFC66_S31_L002_Contig1829	Cluster-10.436	5.3	-0.098	1.005	-0.098	0.922	0.949	IFC66_S31_L002_Contig1829
SFC22_S9_L001_40306_soapGraphK21	Cluster-10.581	0.746	0.178	1.866	0.096	0.924	0.949	SFC22_S9_L001_40306_soapGraphK21
SFC-18_S20_L002_Contig680,IFM26_S8_Contig221,SFC-18_S20_L002_Contig1117	Cluster-10.615	4.078	0.18	1.853	0.097	0.923	0.949	SFC-18_S20_L002_Contig680,IFM26_S8_Contig221,SFC-18_S20_L002_Contig1117
SFC-18_S20_L002_Contig1152	Cluster-10.714	0.707	-0.134	1.514	-0.089	0.929	0.953	SFC-18_S20_L002_Contig1152
SFM-3_S12_L001_Contig1970	Cluster-10.762	0.699	-0.157	1.947	-0.081	0.936	0.958	SFM-3_S12_L001_Contig1970
SFC14_S17_L001_Contig616,SFU-3_S21_L002_Contig1974	Cluster-10.1115	5.644	0.17	2.142	0.08	0.937	0.958	SFC14_S17_L001_Contig616,SFU-3_S21_L002_Contig1974
SFU2_S5_L001_Contig646,IFM061_S15_Contig600	Cluster-10.873	0.921	0.162	2.215	0.073	0.942	0.961	SFU2_S5_L001_Contig646,IFM061_S15_Contig600
SFC22_S9_L001_Contig3222,SFC13_S23_L002_Contig2735,SFC13_S23_L002_Contig104,SFM-3_S12_L001_Contig950,SFC13_S23_L002_Contig2472,SFC13_S23_L002_Contig2742,IFM57_S30_L002_Contig1703	Cluster-10.76	0.713	-0.156	2.21	-0.071	0.944	0.962	SFC22_S9_L001_Contig3222,SFC13_S23_L002_Contig2735,SFC13_S23_L002_Contig104,SFM-3_S12_L001_Contig950,SFC13_S23_L002_Contig2472,SFC13_S23_L002_Contig2742,IFM57_S30_L002_Contig1703
IFM27_S9_1626_soapGraphK61,IFM27_S9_Contig517	Cluster-10.515	0.717	-0.127	2.091	-0.061	0.951	0.968	IFM27_S9_1626_soapGraphK61,IFM27_S9_Contig517
SFC-025_S33_L002_Contig1480,SFM-1_S11_L001_Contig2101	Cluster-10.799	0.96	-0.094	1.614	-0.058	0.953	0.968	SFC-025_S33_L002_Contig1480,SFM-1_S11_L001_Contig2101
SFM-1_S11_L001_Contig2092,SFC14_S17_L001_Contig1021,SFM-3_S12_L001_Contig1763,SFC14_S17_L001_Contig2371,SXC2_S4_L001_Contig1898,SFU-3_S21_L002_Contig2033,SFC13_S23_L002_Contig2454,IFM26_S8_Contig337,SFC13_S23_L002_Contig2145,IFM26_S8_Contig554,IFD6_S1_Contig741,IFD6_S1_Contig549,SFC14_S17_L001_Contig2082,SFM-3_S12_L001_Contig598,SXC2_S4_L001_Contig1910,SFU-3_S21_L002_Contig1764,SFC13_S23_L002_Con…	Cluster-10.998	43.259	0.102	1.755	0.058	0.954	0.968	SFM-1_S11_L001_Contig2092,SFC14_S17_L001_Contig1021,SFM-3_S12_L001_Contig1763,SFC14_S17_L001_Contig2371,SXC2_S4_L001_Contig1898,SFU-3_S21_L002_Contig2033,SFC13_S23_L002_Contig2454,IFM26_S8_Contig337,SFC13_S23_L002_Contig2145,IFM26_S8_Contig554,IFD6_S1_Contig741,IFD6_S1_Contig549,SFC14_S17_L001_Contig2082,SFM-3_S12_L001_Contig598,SXC2_S4_L001_Contig1910,SFU-3_S21_L002_Contig1764,SFC13_S23_L002_Con…
SFM-5_S2_L001_Contig1489,IFM058_S13_Contig853	Cluster-10.433	0.797	-0.116	2.207	-0.053	0.958	0.971	SFM-5_S2_L001_Contig1489,IFM058_S13_Contig853
IFM047_S10_Contig1015,IFM047_S10_Contig614,SFC22_S9_L001_8794_soapGraphK61,IFM054_S12_Contig267,SFC22_S9_L001_Contig2833,SFU-3_S21_L002_Contig1960	Cluster-10.983	2.1	-0.064	1.466	-0.043	0.965	0.977	IFM047_S10_Contig1015,IFM047_S10_Contig614,SFC22_S9_L001_8794_soapGraphK61,IFM054_S12_Contig267,SFC22_S9_L001_Contig2833,SFU-3_S21_L002_Contig1960
SFM-8_S8_L001_Contig3594,SFC22_S9_L001_Contig1614,SFM-1_S11_L001_Contig1213	Cluster-10.492	0.802	-0.07	1.983	-0.035	0.972	0.979	SFM-8_S8_L001_Contig3594,SFC22_S9_L001_Contig1614,SFM-1_S11_L001_Contig1213
SFC19_S24_L002_Contig720,SFC19_S24_L002_26393_soapGraphK21	Cluster-10.732	4.331	0.059	1.612	0.037	0.971	0.979	SFC19_S24_L002_Contig720,SFC19_S24_L002_26393_soapGraphK21
SFM-6_S3_L001_Contig2023,SFM-6_S3_L001_27369_soapGraphK21	Cluster-10.1036	1.319	-0.073	1.906	-0.038	0.969	0.979	SFM-6_S3_L001_Contig2023,SFM-6_S3_L001_27369_soapGraphK21
SFU2_S5_L001_Contig1450,IFM061_S15_Contig1005	Cluster-10.1185	2.605	-0.066	1.977	-0.033	0.973	0.979	SFU2_S5_L001_Contig1450,IFM061_S15_Contig1005
IFM050_S11_Contig1235	Cluster-10.958	0.748	-0.045	1.667	-0.027	0.979	0.983	IFM050_S11_Contig1235
SFC22_S9_L001_Contig3147	Cluster-10.331	1.531	-0.036	1.702	-0.021	0.983	0.984	SFC22_S9_L001_Contig3147
SFC-18_S20_L002_Contig1125,IFM27_S9_Contig428	Cluster-10.841	11.103	-0.03	1.348	-0.022	0.982	0.984	SFC-18_S20_L002_Contig1125,IFM27_S9_Contig428
SFC13_S23_L002_Contig1449,SFM-3_S12_L001_Contig1759	Cluster-10.544	1.533	-0.042	2.242	-0.019	0.985	0.985	SFC13_S23_L002_Contig1449,SFM-3_S12_L001_Contig1759
IFM57_S30_L002_Contig1704	Cluster-0.0	0	0	0	0	1	NA	IFM57_S30_L002_Contig1704
IFM53_S14_L001_Contig1676	Cluster-1.0	0	0	0	0	1	NA	IFM53_S14_L001_Contig1676
IFM53_S14_L001_Contig2068	Cluster-2.0	0	0	0	0	1	NA	IFM53_S14_L001_Contig2068
IFM27_S9_Contig613	Cluster-3.0	0	0	0	0	1	NA	IFM27_S9_Contig613
IFM27_S9_Contig511	Cluster-4.0	0	0	0	0	1	NA	IFM27_S9_Contig511
IFM27_S9_Contig610	Cluster-5.0	0	0	0	0	1	NA	IFM27_S9_Contig610
IFM27_S9_Contig614	Cluster-6.0	0	0	0	0	1	NA	IFM27_S9_Contig614
IFM27_S9_Contig616	Cluster-7.0	0	0	0	0	1	NA	IFM27_S9_Contig616
IFM27_S9_Contig611	Cluster-8.0	0	0	0	0	1	NA	IFM27_S9_Contig611
IFM27_S9_Contig532	Cluster-9.0	0	0	0	0	1	NA	IFM27_S9_Contig532
IFM57_S30_L002_Contig1274	Cluster-10.0	0.026	0.043	2.391	0.018	0.986	NA	IFM57_S30_L002_Contig1274
SFC-21_S22_L002_Contig2700	Cluster-10.2	0	0	0	0	1	NA	SFC-21_S22_L002_Contig2700
IFM26_S8_Contig341	Cluster-10.4	0	0	0	0	1	NA	IFM26_S8_Contig341
SXC2_S4_L001_Contig1246	Cluster-10.7	0	0	0	0	1	NA	SXC2_S4_L001_Contig1246
SFM-6_S3_L001_Contig2001	Cluster-10.8	0.106	-1.173	2.393	-0.49	0.624	NA	SFM-6_S3_L001_Contig2001
IFC66_S31_L002_Contig1834,IFM26_S8_Contig621	Cluster-10.10	0.132	1.712	2.361	0.725	0.468	NA	IFC66_S31_L002_Contig1834,IFM26_S8_Contig621
IFM57_S30_L002_Contig1713	Cluster-10.11	0.02	0.043	2.391	0.018	0.986	NA	IFM57_S30_L002_Contig1713
IFM27_S9_Contig550	Cluster-10.12	0	0	0	0	1	NA	IFM27_S9_Contig550
SFU-3_S21_L002_Contig1252	Cluster-10.14	0.17	1.048	2.35	0.446	0.656	NA	SFU-3_S21_L002_Contig1252
IFM23_S4_Contig489	Cluster-10.15	0.609	-3.997	2.347	-1.703	0.0886	NA	IFM23_S4_Contig489
SFC17_S7_L001_Contig959	Cluster-10.16	0	0	0	0	1	NA	SFC17_S7_L001_Contig959
SFC-21_S22_L002_Contig1726	Cluster-10.19	0.082	-1.914	2.382	-0.803	0.422	NA	SFC-21_S22_L002_Contig1726
SFC13_S23_L002_Contig2664	Cluster-10.21	0.563	-1.072	2.305	-0.465	0.642	NA	SFC13_S23_L002_Contig2664
IFD6_S1_Contig568,IFD6_S1_Contig364,IFD6_S1_Contig933,IFM12_S16_Contig846	Cluster-10.22	0.044	0.043	2.391	0.018	0.986	NA	IFD6_S1_Contig568,IFD6_S1_Contig364,IFD6_S1_Contig933,IFM12_S16_Contig846
SFC-21_S22_L002_Contig2134	Cluster-10.24	0.041	-1.173	2.393	-0.49	0.624	NA	SFC-21_S22_L002_Contig2134
SFC-18_S20_L002_Contig653,IFM57_S30_L002_Contig788	Cluster-10.26	0.074	-1.118	2.376	-0.47	0.638	NA	SFC-18_S20_L002_Contig653,IFM57_S30_L002_Contig788
SFC19_S24_L002_Contig2097	Cluster-10.27	0	0	0	0	1	NA	SFC19_S24_L002_Contig2097
SFC19_S24_L002_Contig1841,IFM-049_S6_Contig34429	Cluster-10.28	0.002	-0.674	2.396	-0.281	0.778	NA	SFC19_S24_L002_Contig1841,IFM-049_S6_Contig34429
SFU-3_S21_L002_Contig2028,SFC14_S17_L001_Contig2162,SFC14_S17_L001_Contig1195,SFC14_S17_L001_16031_soapGraphK41,SFC14_S17_L001_6233_soapGraphK61	Cluster-10.29	0.022	-1.173	2.393	-0.49	0.624	NA	SFU-3_S21_L002_Contig2028,SFC14_S17_L001_Contig2162,SFC14_S17_L001_Contig1195,SFC14_S17_L001_16031_soapGraphK41,SFC14_S17_L001_6233_soapGraphK61
IFM050_S11_Contig3372,IFM050_S11_7722_soapGraphK61	Cluster-10.30	0.013	-1.039	2.394	-0.434	0.664	NA	IFM050_S11_Contig3372,IFM050_S11_7722_soapGraphK61
IFM050_S11_Contig3656	Cluster-10.31	0.383	-1.914	2.382	-0.803	0.422	NA	IFM050_S11_Contig3656
IFM050_S11_Contig3717	Cluster-10.32	0.179	-1.173	2.393	-0.49	0.624	NA	IFM050_S11_Contig3717
IFM050_S11_Contig1836	Cluster-10.34	0.015	0.043	2.391	0.018	0.986	NA	IFM050_S11_Contig1836
IFM050_S11_Contig3771	Cluster-10.35	0	0	0	0	1	NA	IFM050_S11_Contig3771
IFM27_S9_Contig422,IFM27_S9_Contig512,IFM27_S9_1730_soapGraphK61	Cluster-10.36	0	0	0	0	1	NA	IFM27_S9_Contig422,IFM27_S9_Contig512,IFM27_S9_1730_soapGraphK61
IFM050_S11_Contig3424,IFM050_S11_8030_soapGraphK61	Cluster-10.37	0	0	0	0	1	NA	IFM050_S11_Contig3424,IFM050_S11_8030_soapGraphK61
SFC17_S7_L001_Contig1981	Cluster-10.38	0	0	0	0	1	NA	SFC17_S7_L001_Contig1981
SFC17_S7_L001_Contig1225	Cluster-10.39	0.118	-0.431	2.359	-0.183	0.855	NA	SFC17_S7_L001_Contig1225
SFC22_S9_L001_8668_soapGraphK61,SFC22_S9_L001_Contig2819,IFM57_S30_L002_Contig1543	Cluster-10.40	0.003	-0.747	2.396	-0.312	0.755	NA	SFC22_S9_L001_8668_soapGraphK61,SFC22_S9_L001_Contig2819,IFM57_S30_L002_Contig1543
IFM050_S11_Contig3426	Cluster-10.42	0.395	-3.48	2.138	-1.628	0.104	NA	IFM050_S11_Contig3426
IFM050_S11_Contig3722	Cluster-10.43	0.533	-3.973	2.132	-1.863	0.0624	NA	IFM050_S11_Contig3722
IFM050_S11_Contig3375	Cluster-10.48	0.109	-2.246	2.376	-0.945	0.345	NA	IFM050_S11_Contig3375
IFM050_S11_Contig3690	Cluster-10.49	0.027	0.043	2.391	0.018	0.986	NA	IFM050_S11_Contig3690
SFC-21_S22_L002_Contig2156	Cluster-10.50	0.003	-0.747	2.396	-0.312	0.755	NA	SFC-21_S22_L002_Contig2156
IFM050_S11_Contig3756	Cluster-10.51	0.307	-3.085	2.036	-1.516	0.13	NA	IFM050_S11_Contig3756
IFM050_S11_Contig3697	Cluster-10.52	0.246	-2.266	2.305	-0.983	0.326	NA	IFM050_S11_Contig3697
SFC17_S7_L001_Contig1992	Cluster-10.53	0.098	-1.315	2.372	-0.554	0.579	NA	SFC17_S7_L001_Contig1992
SFC14_S17_L001_Contig1188,IFM12_S16_Contig664	Cluster-10.54	0.086	1.436	2.368	0.606	0.544	NA	SFC14_S17_L001_Contig1188,IFM12_S16_Contig664
IFM050_S11_8286_soapGraphK61,IFM050_S11_Contig3414,IFM050_S11_Contig3418	Cluster-10.55	0.041	-1.173	2.393	-0.49	0.624	NA	IFM050_S11_8286_soapGraphK61,IFM050_S11_Contig3414,IFM050_S11_Contig3418
IFM050_S11_18120_soapGraphK51,IFM050_S11_8042_soapGraphK61	Cluster-10.57	0.191	-1.173	2.393	-0.49	0.624	NA	IFM050_S11_18120_soapGraphK51,IFM050_S11_8042_soapGraphK61
IFM12_S16_Contig556	Cluster-10.59	0.017	-0.025	2.389	-0.01	0.992	NA	IFM12_S16_Contig556
IFC66_S31_L002_Contig1801	Cluster-10.61	0.011	-1.043	2.394	-0.436	0.663	NA	IFC66_S31_L002_Contig1801
IFM050_S11_Contig2208	Cluster-10.62	0	0	0	0	1	NA	IFM050_S11_Contig2208
IFM050_S11_Contig3773	Cluster-10.63	0.399	-3.625	2.026	-1.789	0.0736	NA	IFM050_S11_Contig3773
IFM050_S11_Contig3783	Cluster-10.64	0.068	-1.631	2.387	-0.684	0.494	NA	IFM050_S11_Contig3783
IFM050_S11_Contig3388,IFM050_S11_7992_soapGraphK61	Cluster-10.65	0	0	0	0	1	NA	IFM050_S11_Contig3388,IFM050_S11_7992_soapGraphK61
IFM57_S30_L002_Contig1712	Cluster-10.66	0.05	0.236	2.379	0.099	0.921	NA	IFM57_S30_L002_Contig1712
IFM050_S11_Contig3646	Cluster-10.67	0.637	-3.978	1.505	-2.644	0.0082	NA	IFM050_S11_Contig3646
SFC13_S23_L002_Contig2730	Cluster-10.68	0.156	-0.154	2.346	-0.065	0.948	NA	SFC13_S23_L002_Contig2730
IFC66_S31_L002_Contig1255	Cluster-10.69	0.048	-1.81	2.384	-0.759	0.448	NA	IFC66_S31_L002_Contig1255
IFM26_S8_Contig451	Cluster-10.72	0.1	-2.305	2.375	-0.971	0.332	NA	IFM26_S8_Contig451
SFM-6_S3_L001_Contig2009	Cluster-10.75	0	0	0	0	1	NA	SFM-6_S3_L001_Contig2009
IFM050_S11_8008_soapGraphK61,IFM050_S11_Contig1928	Cluster-10.77	0.105	-1.879	2.383	-0.788	0.43	NA	IFM050_S11_8008_soapGraphK61,IFM050_S11_Contig1928
IFM050_S11_Contig3780	Cluster-10.78	0.123	-1.631	2.387	-0.684	0.494	NA	IFM050_S11_Contig3780
IFM050_S11_Contig3765	Cluster-10.79	0.013	-1.063	2.394	-0.444	0.657	NA	IFM050_S11_Contig3765
IFM061_S15_Contig758	Cluster-10.81	0.382	-2.164	1.975	-1.096	0.273	NA	IFM061_S15_Contig758
IFM53_S14_L001_Contig2707	Cluster-10.82	0.296	-3.277	2.357	-1.39	0.165	NA	IFM53_S14_L001_Contig2707
SFM-10_S1_L001_Contig2310,IFM-049_S6_Contig41066	Cluster-10.84	0.503	-0.483	2.304	-0.21	0.834	NA	SFM-10_S1_L001_Contig2310,IFM-049_S6_Contig41066
IFM-049_S6_Contig38686	Cluster-10.85	0	0	0	0	1	NA	IFM-049_S6_Contig38686
IFM-049_S6_Contig40850	Cluster-10.86	0	0	0	0	1	NA	IFM-049_S6_Contig40850
IFM-049_S6_Contig40662	Cluster-10.87	0	0	0	0	1	NA	IFM-049_S6_Contig40662
IFM-049_S6_Contig16997	Cluster-10.90	0.564	-2.219	1.945	-1.141	0.254	NA	IFM-049_S6_Contig16997
IFM-049_S6_Contig6502	Cluster-10.91	0	0	0	0	1	NA	IFM-049_S6_Contig6502
IFD6_S1_Contig976	Cluster-10.92	0.52	-0.691	1.854	-0.373	0.709	NA	IFD6_S1_Contig976
IFM23_S4_Contig692	Cluster-10.96	0.014	-1.079	2.394	-0.451	0.652	NA	IFM23_S4_Contig692
IFM050_S11_Contig3761	Cluster-10.99	0.298	-3.417	2.312	-1.478	0.139	NA	IFM050_S11_Contig3761
SFU-3_S21_L002_Contig2011	Cluster-10.102	0.227	2.377	2.348	1.012	0.311	NA	SFU-3_S21_L002_Contig2011
IFM050_S11_8098_soapGraphK61,IFM050_S11_Contig1916	Cluster-10.104	0.232	-2.243	2.315	-0.969	0.332	NA	IFM050_S11_8098_soapGraphK61,IFM050_S11_Contig1916
SFM-6_S3_L001_Contig1072	Cluster-10.105	0.168	-2.75	2.367	-1.162	0.245	NA	SFM-6_S3_L001_Contig1072
IFM050_S11_Contig1608	Cluster-10.109	0.408	-3.718	1.901	-1.955	0.0505	NA	IFM050_S11_Contig1608
SFM-8_S8_L001_Contig1704	Cluster-10.110	0.02	-1.173	2.393	-0.49	0.624	NA	SFM-8_S8_L001_Contig1704
IFM57_S30_L002_Contig1701	Cluster-10.111	0.313	-3.591	2.175	-1.651	0.0987	NA	IFM57_S30_L002_Contig1701
IFM-049_S6_Contig10693	Cluster-10.112	0	0	0	0	1	NA	IFM-049_S6_Contig10693
SFU-3_S21_L002_Contig1465	Cluster-10.113	0.321	1.66	2.329	0.713	0.476	NA	SFU-3_S21_L002_Contig1465
SFM-6_S3_L001_Contig1385	Cluster-10.114	0	0	0	0	1	NA	SFM-6_S3_L001_Contig1385
SFC22_S9_L001_Contig3164	Cluster-10.115	0.007	-0.166	2.393	-0.069	0.945	NA	SFC22_S9_L001_Contig3164
IFM12_S16_Contig252	Cluster-10.116	0.296	-3.374	2.312	-1.459	0.144	NA	IFM12_S16_Contig252
IFD6_S1_Contig607	Cluster-10.117	0	0	0	0	1	NA	IFD6_S1_Contig607
SFM-8_S8_L001_Contig1714	Cluster-10.118	0.092	-2.243	2.376	-0.944	0.345	NA	SFM-8_S8_L001_Contig1714
IFM23_S4_Contig422	Cluster-10.121	0.36	-4.124	1.8	-2.291	0.022	NA	IFM23_S4_Contig422
SFC17_S7_L001_Contig1993	Cluster-10.123	0.128	-2.494	2.371	-1.052	0.293	NA	SFC17_S7_L001_Contig1993
IFM23_S4_Contig390	Cluster-10.124	0.222	-2.104	2.379	-0.885	0.376	NA	IFM23_S4_Contig390
SFC19_S24_L002_Contig1843	Cluster-10.125	0.067	-1.993	2.381	-0.837	0.402	NA	SFC19_S24_L002_Contig1843
SFU-3_S21_L002_Contig653	Cluster-10.126	0.416	-1.69	2.198	-0.769	0.442	NA	SFU-3_S21_L002_Contig653
SFU-3_S21_L002_Contig1055	Cluster-10.127	0	0	0	0	1	NA	SFU-3_S21_L002_Contig1055
IFM-049_S6_Contig37859	Cluster-10.129	0	0	0	0	1	NA	IFM-049_S6_Contig37859
SFC-18_S20_L002_Contig1436	Cluster-10.130	0	0	0	0	1	NA	SFC-18_S20_L002_Contig1436
SFC-21_S22_L002_Contig2669	Cluster-10.131	0	0	0	0	1	NA	SFC-21_S22_L002_Contig2669
SFC22_S9_L001_Contig2396	Cluster-10.132	0	0	0	0	1	NA	SFC22_S9_L001_Contig2396
SFC-21_S22_L002_Contig2476	Cluster-10.134	0	0	0	0	1	NA	SFC-21_S22_L002_Contig2476
SFU-3_S21_L002_Contig1765	Cluster-10.135	0.151	1.978	2.355	0.84	0.401	NA	SFU-3_S21_L002_Contig1765
SFC15-CM_S29_L002_Contig1971	Cluster-10.144	0.58	3.424	2.336	1.466	0.143	NA	SFC15-CM_S29_L002_Contig1971
SFM-7_S13_L001_Contig2116,SFC17_S7_L001_Contig1977	Cluster-10.145	0.404	-0.512	1.884	-0.272	0.786	NA	SFM-7_S13_L001_Contig2116,SFC17_S7_L001_Contig1977
SFC22_S9_L001_8742_soapGraphK61,SFC22_S9_L001_Contig2336	Cluster-10.146	0.016	-1.118	2.393	-0.467	0.64	NA	SFC22_S9_L001_8742_soapGraphK61,SFC22_S9_L001_Contig2336
SFC19_S24_L002_Contig1118,SFC-21_S22_L002_Contig1679	Cluster-10.148	0.323	2.488	2.206	1.128	0.259	NA	SFC19_S24_L002_Contig1118,SFC-21_S22_L002_Contig1679
IFM27_S9_Contig327	Cluster-10.149	0.014	-1.139	2.393	-0.476	0.634	NA	IFM27_S9_Contig327
SFM-1_S11_L001_Contig1588	Cluster-10.150	0.025	-1.408	2.39	-0.589	0.556	NA	SFM-1_S11_L001_Contig1588
IFM050_S11_Contig3762	Cluster-10.151	0.14	-2.724	2.196	-1.24	0.215	NA	IFM050_S11_Contig3762
SFM-7_S13_L001_Contig2109	Cluster-10.152	0	0	0	0	1	NA	SFM-7_S13_L001_Contig2109
IFM56_S15_Contig944	Cluster-10.153	0	0	0	0	1	NA	IFM56_S15_Contig944
IFM050_S11_8144_soapGraphK61,IFM050_S11_Contig2246	Cluster-10.156	0.644	0.535	1.99	0.269	0.788	NA	IFM050_S11_8144_soapGraphK61,IFM050_S11_Contig2246
IFM050_S11_Contig3681	Cluster-10.157	0.074	-1.173	2.393	-0.49	0.624	NA	IFM050_S11_Contig3681
IFC66_S31_L002_Contig1586,IFC66_S31_L002_5292_soapGraphK61	Cluster-10.158	0.052	-1.537	2.388	-0.644	0.52	NA	IFC66_S31_L002_Contig1586,IFC66_S31_L002_5292_soapGraphK61
SFC-21_S22_L002_Contig2704	Cluster-10.160	0	0	0	0	1	NA	SFC-21_S22_L002_Contig2704
IFD6_S1_Contig951,IFD6_S1_4179_soapGraphK51	Cluster-10.163	0.027	-1.236	2.392	-0.517	0.605	NA	IFD6_S1_Contig951,IFD6_S1_4179_soapGraphK51
SFC-18_S20_L002_Contig1876	Cluster-10.164	0.217	-1.927	1.903	-1.013	0.311	NA	SFC-18_S20_L002_Contig1876
SFC-21_S22_L002_Contig1917	Cluster-10.166	0	0	0	0	1	NA	SFC-21_S22_L002_Contig1917
SFC22_S9_L001_Contig3176	Cluster-10.167	0	0	0	0	1	NA	SFC22_S9_L001_Contig3176
SXC2_S4_L001_Contig505	Cluster-10.168	0.006	-0.878	2.395	-0.367	0.714	NA	SXC2_S4_L001_Contig505
IFC66_S31_L002_Contig1799	Cluster-10.170	0.191	-1.173	2.393	-0.49	0.624	NA	IFC66_S31_L002_Contig1799
SFM-8_S8_L001_Contig1071	Cluster-10.177	0.315	-0.349	1.992	-0.175	0.861	NA	SFM-8_S8_L001_Contig1071
SFC13_S23_L002_Contig2457	Cluster-10.178	0.366	-1.373	1.988	-0.691	0.49	NA	SFC13_S23_L002_Contig2457
IFC66_S31_L002_Contig1775	Cluster-10.179	0.383	-1.914	2.382	-0.803	0.422	NA	IFC66_S31_L002_Contig1775
SFC-21_S22_L002_Contig2338	Cluster-10.180	0.159	-2.733	2.367	-1.155	0.248	NA	SFC-21_S22_L002_Contig2338
SFM-8_S8_L001_Contig2481,SFC22_S9_L001_Contig2390	Cluster-10.182	0.417	0.55	1.97	0.279	0.78	NA	SFM-8_S8_L001_Contig2481,SFC22_S9_L001_Contig2390
IFM058_S13_Contig841	Cluster-10.184	0.462	2.673	2.059	1.298	0.194	NA	IFM058_S13_Contig841
SFC17_S7_L001_Contig1434	Cluster-10.186	0.477	0.756	2.308	0.328	0.743	NA	SFC17_S7_L001_Contig1434
IFC66_S31_L002_Contig1824,SFU-3_S21_L002_Contig1772	Cluster-10.187	0.421	-0.875	2.311	-0.379	0.705	NA	IFC66_S31_L002_Contig1824,SFU-3_S21_L002_Contig1772
SFM-8_S8_L001_10484_soapGraphK61,SFM-8_S8_L001_Contig3144,SFC22_S9_L001_Contig2392	Cluster-10.188	0.071	0.023	2.376	0.01	0.992	NA	SFM-8_S8_L001_10484_soapGraphK61,SFM-8_S8_L001_Contig3144,SFC22_S9_L001_Contig2392
IFM050_S11_34728_soapGraphK41,IFM050_S11_8190_soapGraphK61,IFM050_S11_Contig2156	Cluster-10.190	0	0	0	0	1	NA	IFM050_S11_34728_soapGraphK41,IFM050_S11_8190_soapGraphK61,IFM050_S11_Contig2156
SFM-1_S11_L001_Contig1595	Cluster-10.191	0.246	2.472	2.346	1.054	0.292	NA	SFM-1_S11_L001_Contig1595
IFM050_S11_Contig2263	Cluster-10.192	0	0	0	0	1	NA	IFM050_S11_Contig2263
IFC66_S31_L002_Contig1803	Cluster-10.193	0.103	1.547	2.365	0.654	0.513	NA	IFC66_S31_L002_Contig1803
IFM050_S11_Contig3770	Cluster-10.195	0.168	-1.315	2.372	-0.554	0.579	NA	IFM050_S11_Contig3770
SFC15-CM_S29_L002_Contig1979	Cluster-10.202	0.006	-0.878	2.395	-0.367	0.714	NA	SFC15-CM_S29_L002_Contig1979
SFU2_S5_L001_Contig650	Cluster-10.203	0	0	0	0	1	NA	SFU2_S5_L001_Contig650
SFC17_S7_L001_Contig1934	Cluster-10.204	0.102	0.755	2.364	0.32	0.749	NA	SFC17_S7_L001_Contig1934
SFC-18_S20_L002_Contig1153	Cluster-10.205	0.074	1.189	2.374	0.501	0.616	NA	SFC-18_S20_L002_Contig1153
SFU2_S5_L001_Contig1889	Cluster-10.206	0.05	-1.752	2.385	-0.734	0.463	NA	SFU2_S5_L001_Contig1889
SFM-8_S8_L001_Contig1713	Cluster-10.207	0.066	-1.924	2.382	-0.808	0.419	NA	SFM-8_S8_L001_Contig1713
SFM-8_S8_L001_Contig3557,IFM058_S13_Contig681	Cluster-10.209	0.32	-3.772	2.047	-1.842	0.0654	NA	SFM-8_S8_L001_Contig3557,IFM058_S13_Contig681
SFC-18_S20_L002_Contig1463	Cluster-10.210	0	0	0	0	1	NA	SFC-18_S20_L002_Contig1463
SFM-1_S11_L001_Contig1616	Cluster-10.211	0.003	-0.747	2.396	-0.312	0.755	NA	SFM-1_S11_L001_Contig1616
IFC66_S31_L002_Contig1777	Cluster-10.213	0.035	0.043	2.391	0.018	0.986	NA	IFC66_S31_L002_Contig1777
IFM21_S3_Contig607	Cluster-10.214	0.373	-3.179	1.94	-1.639	0.101	NA	IFM21_S3_Contig607
IFM058_S13_Contig677	Cluster-10.215	0.206	1.669	2.345	0.712	0.477	NA	IFM058_S13_Contig677
IFM050_S11_Contig3751	Cluster-10.216	0.357	-3.277	2.15	-1.524	0.127	NA	IFM050_S11_Contig3751
SFC17_S7_L001_Contig1338,IFC66_S31_L002_5038_soapGraphK61	Cluster-10.217	0.563	-1.649	1.969	-0.838	0.402	NA	SFC17_S7_L001_Contig1338,IFC66_S31_L002_5038_soapGraphK61
SFM-7_S13_L001_Contig1032	Cluster-10.218	0.024	-0.101	2.39	-0.042	0.966	NA	SFM-7_S13_L001_Contig1032
SFC-21_S22_L002_11345_soapGraphK51,SFC-21_S22_L002_Contig1562	Cluster-10.221	0.005	-0.815	2.396	-0.34	0.734	NA	SFC-21_S22_L002_11345_soapGraphK51,SFC-21_S22_L002_Contig1562
SFU-3_S21_L002_Contig2003	Cluster-10.224	0.508	-0.905	2.197	-0.412	0.68	NA	SFU-3_S21_L002_Contig2003
SFM-1_S11_L001_Contig1851,SXC2_S4_L001_Contig1860,SFC15-CM_S29_L002_Contig1923	Cluster-10.226	0.517	3.389	2.272	1.492	0.136	NA	SFM-1_S11_L001_Contig1851,SXC2_S4_L001_Contig1860,SFC15-CM_S29_L002_Contig1923
IFM12_S16_Contig232	Cluster-10.227	0.104	-1.34	2.371	-0.565	0.572	NA	IFM12_S16_Contig232
SFU2_S5_L001_Contig1269	Cluster-10.228	0.522	3.41	2.267	1.504	0.133	NA	SFU2_S5_L001_Contig1269
IFM26_S8_Contig557,IFM26_S8_1976_soapGraphK61,IFM26_S8_Contig335	Cluster-10.229	0	0	0	0	1	NA	IFM26_S8_Contig557,IFM26_S8_1976_soapGraphK61,IFM26_S8_Contig335
IFM-049_S6_293046_soapGraphK41	Cluster-10.231	0.486	-3.171	2.163	-1.466	0.143	NA	IFM-049_S6_293046_soapGraphK41
IFM-049_S6_Contig40805	Cluster-10.232	0	0	0	0	1	NA	IFM-049_S6_Contig40805
IFM57_S30_L002_Contig1699	Cluster-10.235	0.272	-0.816	2.33	-0.35	0.726	NA	IFM57_S30_L002_Contig1699
IFM-049_S6_Contig6731	Cluster-10.239	0.216	-3.029	2.362	-1.283	0.2	NA	IFM-049_S6_Contig6731
SFU2_S5_L001_Contig1879,SXC2_S4_L001_Contig1884,SXC2_S4_L001_Contig1871	Cluster-10.240	0.157	1.177	2.348	0.501	0.616	NA	SFU2_S5_L001_Contig1879,SXC2_S4_L001_Contig1884,SXC2_S4_L001_Contig1871
IFM058_S13_Contig243	Cluster-10.242	0.305	-2.843	2.334	-1.218	0.223	NA	IFM058_S13_Contig243
IFM-049_S6_Contig39492	Cluster-10.243	0	0	0	0	1	NA	IFM-049_S6_Contig39492
SFC17_S7_L001_Contig540,IFM050_S11_Contig3785	Cluster-10.245	0.583	-3.324	1.581	-2.103	0.0355	NA	SFC17_S7_L001_Contig540,IFM050_S11_Contig3785
SFC17_S7_L001_Contig1987	Cluster-10.247	0.105	-1.833	2.384	-0.769	0.442	NA	SFC17_S7_L001_Contig1987
IFM23_S4_Contig689	Cluster-10.248	0.652	2.89	1.941	1.488	0.137	NA	IFM23_S4_Contig689
SFC-21_S22_L002_Contig1725	Cluster-10.249	0.149	-1.962	2.381	-0.824	0.41	NA	SFC-21_S22_L002_Contig1725
IFM27_S9_Contig628,SFC-18_S20_L002_Contig1912,IFD6_S1_Contig365	Cluster-10.250	0.315	-0.809	1.995	-0.406	0.685	NA	IFM27_S9_Contig628,SFC-18_S20_L002_Contig1912,IFD6_S1_Contig365
IFM050_S11_Contig3638	Cluster-10.251	0.212	-1.76	2.385	-0.738	0.461	NA	IFM050_S11_Contig3638
SFM-3_S12_L001_Contig798	Cluster-10.252	0.594	3.437	2.335	1.472	0.141	NA	SFM-3_S12_L001_Contig798
SFC17_S7_L001_Contig967,IFM061_S15_Contig277	Cluster-10.254	0.423	1.467	1.864	0.787	0.431	NA	SFC17_S7_L001_Contig967,IFM061_S15_Contig277
SFC17_S7_L001_Contig1994,SFM-10_S1_L001_Contig2554	Cluster-10.255	0.231	-3.078	2.361	-1.304	0.192	NA	SFC17_S7_L001_Contig1994,SFM-10_S1_L001_Contig2554
IFC66_S31_L002_Contig1550	Cluster-10.256	0.18	-1.118	2.354	-0.475	0.635	NA	IFC66_S31_L002_Contig1550
SFC-18_S20_L002_Contig578	Cluster-10.257	0.135	1.871	2.357	0.794	0.427	NA	SFC-18_S20_L002_Contig578
IFM57_S30_L002_Contig1537	Cluster-10.259	0	0	0	0	1	NA	IFM57_S30_L002_Contig1537
SFM-1_S11_L001_4872_soapGraphK61,SFM-1_S11_L001_Contig1867	Cluster-10.260	0.429	-0.129	1.867	-0.069	0.945	NA	SFM-1_S11_L001_4872_soapGraphK61,SFM-1_S11_L001_Contig1867
SXC2_S4_L001_Contig1421	Cluster-10.261	0.008	-0.936	2.395	-0.391	0.696	NA	SXC2_S4_L001_Contig1421
SXC2_S4_L001_Contig1682	Cluster-10.263	0.011	-0.017	2.392	-0.007	0.994	NA	SXC2_S4_L001_Contig1682
IFM050_S11_82516_soapGraphK21,IFM050_S11_Contig2230	Cluster-10.266	0.569	-2.723	1.928	-1.412	0.158	NA	IFM050_S11_82516_soapGraphK21,IFM050_S11_Contig2230
IFM-049_S6_Contig34537	Cluster-10.267	0.046	0.723	2.381	0.304	0.761	NA	IFM-049_S6_Contig34537
SFC15-CM_S29_L002_Contig611	Cluster-10.268	0.37	-2.005	2.084	-0.962	0.336	NA	SFC15-CM_S29_L002_Contig611
SFM-1_S11_L001_Contig575	Cluster-10.269	0	0	0	0	1	NA	SFM-1_S11_L001_Contig575
IFM050_S11_Contig1648	Cluster-10.270	0.011	-0.017	2.392	-0.007	0.994	NA	IFM050_S11_Contig1648
IFM12_S16_Contig836	Cluster-10.271	0.016	0.049	2.39	0.021	0.984	NA	IFM12_S16_Contig836
SFM-8_S8_L001_Contig3600,IFM57_S30_L002_Contig1715,IFD6_S1_Contig943	Cluster-10.275	0.586	-2.062	1.652	-1.248	0.212	NA	SFM-8_S8_L001_Contig3600,IFM57_S30_L002_Contig1715,IFD6_S1_Contig943
IFM26_S8_Contig645	Cluster-10.276	0.33	-0.093	2.228	-0.042	0.967	NA	IFM26_S8_Contig645
SFC17_S7_L001_5499_soapGraphK61,SFC17_S7_L001_Contig1743	Cluster-10.277	0.056	-0.603	2.384	-0.253	0.8	NA	SFC17_S7_L001_5499_soapGraphK61,SFC17_S7_L001_Contig1743
IFD6_S1_Contig254	Cluster-10.278	0.033	-1.488	2.389	-0.623	0.533	NA	IFD6_S1_Contig254
IFM12_S16_Contig524,SFC13_S23_L002_Contig1790,SFM-3_S12_L001_Contig1455	Cluster-10.280	0.607	2.725	2.287	1.191	0.234	NA	IFM12_S16_Contig524,SFC13_S23_L002_Contig1790,SFM-3_S12_L001_Contig1455
SFM-10_S1_L001_Contig2256,SFM-10_S1_L001_Contig1239	Cluster-10.283	0.244	-1.463	2.342	-0.625	0.532	NA	SFM-10_S1_L001_Contig2256,SFM-10_S1_L001_Contig1239
SFM-6_S3_L001_Contig1997	Cluster-10.284	0.002	-0.674	2.396	-0.281	0.778	NA	SFM-6_S3_L001_Contig1997
IFM061_S15_Contig885	Cluster-10.286	0.266	1.661	2.337	0.711	0.477	NA	IFM061_S15_Contig885
IFM57_S30_L002_Contig1702	Cluster-10.288	0.197	-2.05	2.257	-0.908	0.364	NA	IFM57_S30_L002_Contig1702
SFU-3_S21_L002_Contig1460	Cluster-10.289	0.18	1.931	2.35	0.822	0.411	NA	SFU-3_S21_L002_Contig1460
SFU-3_S21_L002_Contig1970,IFM047_S10_Contig1620	Cluster-10.290	0.573	-3.435	2.145	-1.601	0.109	NA	SFU-3_S21_L002_Contig1970,IFM047_S10_Contig1620
IFM-049_S6_Contig40838	Cluster-10.291	0	0	0	0	1	NA	IFM-049_S6_Contig40838
IFM-049_S6_Contig39415	Cluster-10.292	0.002	-0.674	2.396	-0.281	0.778	NA	IFM-049_S6_Contig39415
SFU-3_S21_L002_Contig2004,SFU-3_S21_L002_Contig2027,SFC14_S17_L001_Contig2409	Cluster-10.294	0.096	-0.544	2.385	-0.228	0.819	NA	SFU-3_S21_L002_Contig2004,SFU-3_S21_L002_Contig2027,SFC14_S17_L001_Contig2409
IFM-049_S6_Contig33224	Cluster-10.295	0	0	0	0	1	NA	IFM-049_S6_Contig33224
IFM050_S11_Contig1887	Cluster-10.296	0	0	0	0	1	NA	IFM050_S11_Contig1887
SFC22_S9_L001_Contig3217	Cluster-10.297	0.124	-1.754	2.225	-0.788	0.431	NA	SFC22_S9_L001_Contig3217
IFM26_S8_Contig415	Cluster-10.298	0	0	0	0	1	NA	IFM26_S8_Contig415
SFC19_S24_L002_Contig1120	Cluster-10.299	0	0	0	0	1	NA	SFC19_S24_L002_Contig1120
IFM57_S30_L002_4406_soapGraphK61,IFM57_S30_L002_Contig1553	Cluster-10.300	0.059	0.614	2.379	0.258	0.796	NA	IFM57_S30_L002_4406_soapGraphK61,IFM57_S30_L002_Contig1553
SFC-21_S22_L002_Contig2702	Cluster-10.303	0	0	0	0	1	NA	SFC-21_S22_L002_Contig2702
IFM050_S11_7698_soapGraphK61,IFM050_S11_Contig3360	Cluster-10.309	0	0	0	0	1	NA	IFM050_S11_7698_soapGraphK61,IFM050_S11_Contig3360
IFM050_S11_Contig3776	Cluster-10.310	0.323	-2.95	2.281	-1.294	0.196	NA	IFM050_S11_Contig3776
IFM-049_S6_Contig40890	Cluster-10.311	0.386	2.964	2.34	1.267	0.205	NA	IFM-049_S6_Contig40890
SFC-18_S20_L002_Contig1655	Cluster-10.313	0.158	0.724	2.346	0.308	0.758	NA	SFC-18_S20_L002_Contig1655
IFM-049_S6_Contig33339	Cluster-10.314	0.105	1.496	2.366	0.632	0.527	NA	IFM-049_S6_Contig33339
IFM058_S13_Contig803	Cluster-10.316	0.016	-0.033	2.391	-0.014	0.989	NA	IFM058_S13_Contig803
IFM050_S11_Contig3764	Cluster-10.318	0.095	-1.719	2.386	-0.721	0.471	NA	IFM050_S11_Contig3764
SXC2_S4_L001_Contig1660	Cluster-10.319	0.495	0.845	2.092	0.404	0.686	NA	SXC2_S4_L001_Contig1660
SFC22_S9_L001_Contig283	Cluster-10.320	0	0	0	0	1	NA	SFC22_S9_L001_Contig283
SFM-3_S12_L001_Contig855,SFC13_S23_L002_Contig1754	Cluster-10.322	0	0	0	0	1	NA	SFM-3_S12_L001_Contig855,SFC13_S23_L002_Contig1754
IFM050_S11_Contig3649	Cluster-10.323	0.027	0.043	2.391	0.018	0.986	NA	IFM050_S11_Contig3649
SFC22_S9_L001_Contig2519,SFC22_S9_L001_8508_soapGraphK61	Cluster-10.325	0.002	-0.674	2.396	-0.281	0.778	NA	SFC22_S9_L001_Contig2519,SFC22_S9_L001_8508_soapGraphK61
SFC15-CM_S29_L002_Contig1764	Cluster-10.328	0.567	-0.896	2.206	-0.406	0.685	NA	SFC15-CM_S29_L002_Contig1764
IFM57_S30_L002_Contig1681	Cluster-10.329	0.565	-3.985	2.347	-1.698	0.0896	NA	IFM57_S30_L002_Contig1681
IFC66_S31_L002_5290_soapGraphK61,IFC66_S31_L002_Contig1580,IFC66_S31_L002_Contig1567	Cluster-10.339	0.011	-1.043	2.394	-0.436	0.663	NA	IFC66_S31_L002_5290_soapGraphK61,IFC66_S31_L002_Contig1580,IFC66_S31_L002_Contig1567
IFM050_S11_Contig3699	Cluster-10.340	0.232	-1.914	2.382	-0.803	0.422	NA	IFM050_S11_Contig3699
SFM-6_S3_L001_Contig1977	Cluster-10.341	0.046	0.72	2.382	0.302	0.762	NA	SFM-6_S3_L001_Contig1977
SFC17_S7_L001_Contig2017	Cluster-10.342	0.533	-2.116	1.864	-1.135	0.256	NA	SFC17_S7_L001_Contig2017
SFC17_S7_L001_Contig1958	Cluster-10.345	0.162	0.21	2.344	0.09	0.929	NA	SFC17_S7_L001_Contig1958
IFM058_S13_Contig871	Cluster-10.346	0.155	-2.619	2.369	-1.106	0.269	NA	IFM058_S13_Contig871
IFM12_S16_Contig827	Cluster-10.349	0.006	-0.878	2.395	-0.367	0.714	NA	IFM12_S16_Contig827
IFC66_S31_L002_Contig1008	Cluster-10.350	0.477	-1.934	1.851	-1.045	0.296	NA	IFC66_S31_L002_Contig1008
IFM-049_S6_152377_soapGraphK61,IFM-049_S6_Contig33552	Cluster-10.355	0.002	-0.674	2.396	-0.281	0.778	NA	IFM-049_S6_152377_soapGraphK61,IFM-049_S6_Contig33552
IFM57_S30_L002_Contig1291,SFM-8_S8_L001_Contig3603,IFM57_S30_L002_Contig441	Cluster-10.358	0.069	1.082	2.376	0.455	0.649	NA	IFM57_S30_L002_Contig1291,SFM-8_S8_L001_Contig3603,IFM57_S30_L002_Contig441
IFM047_S10_Contig1655	Cluster-10.359	0	0	0	0	1	NA	IFM047_S10_Contig1655
IFM26_S8_Contig544	Cluster-10.360	0.041	-1.173	2.393	-0.49	0.624	NA	IFM26_S8_Contig544
IFM21_S3_Contig907	Cluster-10.362	0.19	0.061	2.265	0.027	0.979	NA	IFM21_S3_Contig907
IFM57_S30_L002_Contig1309,IFM57_S30_L002_4446_soapGraphK61	Cluster-10.363	0.143	-1.54	2.362	-0.652	0.514	NA	IFM57_S30_L002_Contig1309,IFM57_S30_L002_4446_soapGraphK61
SFC-21_S22_L002_Contig2473	Cluster-10.364	0.125	-1.914	2.382	-0.803	0.422	NA	SFC-21_S22_L002_Contig2473
IFM-049_S6_Contig40700	Cluster-10.366	0.002	-0.674	2.396	-0.281	0.778	NA	IFM-049_S6_Contig40700
SFC22_S9_L001_Contig1118,IFM57_S30_L002_Contig1017,IFM57_S30_L002_Contig777	Cluster-10.367	0.073	0.338	2.375	0.142	0.887	NA	SFC22_S9_L001_Contig1118,IFM57_S30_L002_Contig1017,IFM57_S30_L002_Contig777
IFM-049_S6_Contig40737	Cluster-10.368	0	0	0	0	1	NA	IFM-049_S6_Contig40737
IFM26_S8_Contig257	Cluster-10.371	0	0	0	0	1	NA	IFM26_S8_Contig257
SFM-6_S3_L001_Contig1054	Cluster-10.372	0.117	-2.256	2.376	-0.95	0.342	NA	SFM-6_S3_L001_Contig1054
SFC-21_S22_L002_Contig2706	Cluster-10.375	0.651	-4.103	2.346	-1.749	0.0802	NA	SFC-21_S22_L002_Contig2706
SXC2_S4_L001_Contig1903,SXC2_S4_L001_8223_soapGraphK51,IFM21_S3_Contig930,IFM21_S3_Contig889	Cluster-10.380	0.434	-0.117	2.309	-0.051	0.96	NA	SXC2_S4_L001_Contig1903,SXC2_S4_L001_8223_soapGraphK51,IFM21_S3_Contig930,IFM21_S3_Contig889
SFM-6_S3_L001_Contig1967	Cluster-10.382	0.336	-3.162	2.192	-1.442	0.149	NA	SFM-6_S3_L001_Contig1967
SFC19_S24_L002_Contig1566	Cluster-10.383	0.057	-1.349	2.391	-0.564	0.573	NA	SFC19_S24_L002_Contig1566
IFM-049_S6_Contig11023	Cluster-10.384	0	0	0	0	1	NA	IFM-049_S6_Contig11023
SFC-21_S22_L002_Contig2688	Cluster-10.387	0.075	-0.658	2.384	-0.276	0.783	NA	SFC-21_S22_L002_Contig2688
IFM57_S30_L002_Contig743,SFM-8_S8_L001_Contig2079,SFC22_S9_L001_Contig3209	Cluster-10.389	0.403	0.241	2.309	0.104	0.917	NA	IFM57_S30_L002_Contig743,SFM-8_S8_L001_Contig2079,SFC22_S9_L001_Contig3209
SFM-8_S8_L001_Contig2492	Cluster-10.392	0.465	1.544	2.315	0.667	0.505	NA	SFM-8_S8_L001_Contig2492
IFM57_S30_L002_Contig1009,SFM-8_S8_L001_Contig3101,SFC22_S9_L001_Contig2608	Cluster-10.393	0	0	0	0	1	NA	IFM57_S30_L002_Contig1009,SFM-8_S8_L001_Contig3101,SFC22_S9_L001_Contig2608
SFM-8_S8_L001_Contig1619,SFC22_S9_L001_Contig3211	Cluster-10.395	0.449	1.135	2.095	0.542	0.588	NA	SFM-8_S8_L001_Contig1619,SFC22_S9_L001_Contig3211
IFD6_S1_Contig769	Cluster-10.396	0	0	0	0	1	NA	IFD6_S1_Contig769
IFM-049_S6_Contig12747	Cluster-10.397	0.375	-1.011	2.097	-0.482	0.63	NA	IFM-049_S6_Contig12747
SFC-18_S20_L002_Contig1469,IFM058_S13_Contig876	Cluster-10.398	0.387	-1.602	2.305	-0.695	0.487	NA	SFC-18_S20_L002_Contig1469,IFM058_S13_Contig876
SFM-7_S13_L001_Contig2112	Cluster-10.399	0.022	-1.173	2.393	-0.49	0.624	NA	SFM-7_S13_L001_Contig2112
SFC17_S7_L001_Contig1727	Cluster-10.401	0	0	0	0	1	NA	SFC17_S7_L001_Contig1727
SFM-7_S13_L001_Contig1894,SFC17_S7_L001_Contig1734,SFC17_S7_L001_5537_soapGraphK61	Cluster-10.402	0.115	-2.384	2.373	-1.004	0.315	NA	SFM-7_S13_L001_Contig1894,SFC17_S7_L001_Contig1734,SFC17_S7_L001_5537_soapGraphK61
SFC-21_S22_L002_Contig2485,SFC-21_S22_L002_6682_soapGraphK61	Cluster-10.403	0.008	-0.936	2.395	-0.391	0.696	NA	SFC-21_S22_L002_Contig2485,SFC-21_S22_L002_6682_soapGraphK61
SFM-7_S13_L001_Contig22,SFC17_S7_L001_Contig1717	Cluster-10.404	0.131	-0.109	2.087	-0.052	0.958	NA	SFM-7_S13_L001_Contig22,SFC17_S7_L001_Contig1717
IFM050_S11_8330_soapGraphK61,IFM050_S11_Contig2878	Cluster-10.405	0.093	-1.914	2.382	-0.803	0.422	NA	IFM050_S11_8330_soapGraphK61,IFM050_S11_Contig2878
SFC14_S17_L001_Contig2407	Cluster-10.407	0.032	-1.173	2.393	-0.49	0.624	NA	SFC14_S17_L001_Contig2407
SFM-1_S11_L001_Contig2050	Cluster-10.409	0.213	-2.894	2.352	-1.23	0.219	NA	SFM-1_S11_L001_Contig2050
IFM12_S16_Contig835	Cluster-10.412	0.424	-3.851	2.155	-1.787	0.0739	NA	IFM12_S16_Contig835
SFC-023_S32_L002_2405_soapGraphK61,SFC-023_S32_L002_Contig1063	Cluster-10.419	0.409	-1.714	1.733	-0.989	0.323	NA	SFC-023_S32_L002_2405_soapGraphK61,SFC-023_S32_L002_Contig1063
SFC-21_S22_L002_Contig1696	Cluster-10.422	0	0	0	0	1	NA	SFC-21_S22_L002_Contig1696
SFC-21_S22_L002_Contig2100	Cluster-10.424	0	0	0	0	1	NA	SFC-21_S22_L002_Contig2100
SFM-6_S3_L001_Contig603	Cluster-10.428	0.393	2.064	2.325	0.888	0.375	NA	SFM-6_S3_L001_Contig603
SFC-21_S22_L002_Contig1710	Cluster-10.429	0.04	-1.575	2.388	-0.659	0.51	NA	SFC-21_S22_L002_Contig1710
IFM12_S16_Contig229	Cluster-10.430	0.148	-2.618	2.369	-1.105	0.269	NA	IFM12_S16_Contig229
IFM-049_S6_Contig16803	Cluster-10.431	0.109	0.256	2.373	0.108	0.914	NA	IFM-049_S6_Contig16803
SFC-21_S22_L002_Contig1705	Cluster-10.432	0.005	-0.24	2.394	-0.1	0.92	NA	SFC-21_S22_L002_Contig1705
IFC66_S31_L002_Contig1486	Cluster-10.439	0.462	-2.38	1.941	-1.226	0.22	NA	IFC66_S31_L002_Contig1486
SFM-1_S11_L001_Contig1600	Cluster-10.441	0.081	1.265	2.372	0.533	0.594	NA	SFM-1_S11_L001_Contig1600
SFC19_S24_L002_Contig691	Cluster-10.444	0.246	-1.522	2.244	-0.678	0.498	NA	SFC19_S24_L002_Contig691
SFC-21_S22_L002_Contig2666	Cluster-10.449	0.029	-1.173	2.393	-0.49	0.624	NA	SFC-21_S22_L002_Contig2666
SFC13_S23_L002_Contig2451,SFC13_S23_L002_6550_soapGraphK61,SFM-3_S12_L001_Contig915	Cluster-10.450	0.584	0.278	2.213	0.126	0.9	NA	SFC13_S23_L002_Contig2451,SFC13_S23_L002_6550_soapGraphK61,SFM-3_S12_L001_Contig915
SFC19_S24_L002_Contig1159	Cluster-10.451	0.183	0.065	2.342	0.028	0.978	NA	SFC19_S24_L002_Contig1159
SFC-21_S22_L002_Contig2484,SFC-21_S22_L002_6672_soapGraphK61	Cluster-10.453	0.063	-1.537	2.388	-0.644	0.52	NA	SFC-21_S22_L002_Contig2484,SFC-21_S22_L002_6672_soapGraphK61
SFC-21_S22_L002_Contig2683	Cluster-10.454	0.071	-2.01	2.38	-0.844	0.399	NA	SFC-21_S22_L002_Contig2683
SFC-21_S22_L002_Contig2368	Cluster-10.462	0.369	-2.752	1.932	-1.425	0.154	NA	SFC-21_S22_L002_Contig2368
IFM26_S8_Contig92	Cluster-10.472	0	0	0	0	1	NA	IFM26_S8_Contig92
IFM27_S9_Contig216	Cluster-10.473	0.173	-0.312	2.06	-0.151	0.88	NA	IFM27_S9_Contig216
SFC-18_S20_L002_24647_soapGraphK21	Cluster-10.475	0.173	0.176	2.341	0.075	0.94	NA	SFC-18_S20_L002_24647_soapGraphK21
SFM-10_S1_L001_Contig1847,IFM21_S3_Contig792,SFC15-CM_S29_L002_Contig1084	Cluster-10.477	0.463	3.172	2.338	1.357	0.175	NA	SFM-10_S1_L001_Contig1847,IFM21_S3_Contig792,SFC15-CM_S29_L002_Contig1084
IFM24_S5_Contig967	Cluster-10.478	0.53	-2.078	1.827	-1.137	0.256	NA	IFM24_S5_Contig967
SFC-18_S20_L002_Contig1913	Cluster-10.481	0.302	-1.315	2.126	-0.618	0.536	NA	SFC-18_S20_L002_Contig1913
IFM058_S13_Contig443	Cluster-10.484	0.193	-0.543	2.29	-0.237	0.813	NA	IFM058_S13_Contig443
IFC66_S31_L002_5208_soapGraphK61,IFC66_S31_L002_Contig708	Cluster-10.486	0.234	1.411	2.127	0.663	0.507	NA	IFC66_S31_L002_5208_soapGraphK61,IFC66_S31_L002_Contig708
SFC-18_S20_L002_Contig1910	Cluster-10.487	0.097	0.069	2.374	0.029	0.977	NA	SFC-18_S20_L002_Contig1910
SFM-6_S3_L001_Contig607	Cluster-10.488	0.591	1.229	2.088	0.589	0.556	NA	SFM-6_S3_L001_Contig607
IFM21_S3_Contig779	Cluster-10.489	0.546	-3.605	1.926	-1.872	0.0612	NA	IFM21_S3_Contig779
SFM-7_S13_L001_Contig792	Cluster-10.496	0.583	0.219	2.1	0.104	0.917	NA	SFM-7_S13_L001_Contig792
SFC17_S7_L001_8712_soapGraphK51,IFM050_S11_Contig1929	Cluster-10.500	0.224	-0.327	2.029	-0.161	0.872	NA	SFC17_S7_L001_8712_soapGraphK51,IFM050_S11_Contig1929
SFC17_S7_L001_Contig2004	Cluster-10.501	0.157	-0.773	2.353	-0.329	0.742	NA	SFC17_S7_L001_Contig2004
SFC-21_S22_L002_Contig2164	Cluster-10.505	0.188	-1.503	1.921	-0.783	0.434	NA	SFC-21_S22_L002_Contig2164
IFD6_S1_Contig889	Cluster-10.506	0	0	0	0	1	NA	IFD6_S1_Contig889
SFM-7_S13_L001_Contig144,IFM27_S9_Contig527	Cluster-10.507	0.544	-3.784	2.031	-1.863	0.0625	NA	SFM-7_S13_L001_Contig144,IFM27_S9_Contig527
SFC15-CM_S29_L002_Contig1945	Cluster-10.510	0.118	-2.008	2.38	-0.844	0.399	NA	SFC15-CM_S29_L002_Contig1945
IFM050_S11_Contig2814,IFM050_S11_7844_soapGraphK61	Cluster-10.512	0.308	-1.733	1.938	-0.894	0.371	NA	IFM050_S11_Contig2814,IFM050_S11_7844_soapGraphK61
IFM050_S11_Contig3438	Cluster-10.513	0.2	-2.147	2.031	-1.057	0.29	NA	IFM050_S11_Contig3438
SFC14_S17_L001_6263_soapGraphK61,SFC14_S17_L001_Contig441	Cluster-10.514	0.336	0.991	1.678	0.591	0.555	NA	SFC14_S17_L001_6263_soapGraphK61,SFC14_S17_L001_Contig441
SFC17_S7_L001_5313_soapGraphK61,IFM-049_S6_158469_soapGraphK61,IFM-049_S6_Contig32974	Cluster-10.517	0.266	-1.872	2.346	-0.798	0.425	NA	SFC17_S7_L001_5313_soapGraphK61,IFM-049_S6_158469_soapGraphK61,IFM-049_S6_Contig32974
SFC22_S9_L001_Contig1894	Cluster-10.518	0.057	-1.796	2.384	-0.753	0.451	NA	SFC22_S9_L001_Contig1894
IFM-049_S6_Contig40892	Cluster-10.520	0.224	-3.074	2.096	-1.467	0.142	NA	IFM-049_S6_Contig40892
IFM050_S11_Contig3794	Cluster-10.521	0.519	-4.188	1.915	-2.186	0.0288	NA	IFM050_S11_Contig3794
IFD6_S1_Contig536	Cluster-10.522	0	0	0	0	1	NA	IFD6_S1_Contig536
SFC13_S23_L002_Contig2723,IFM26_S8_Contig204	Cluster-10.523	0.646	1.074	2.09	0.514	0.607	NA	SFC13_S23_L002_Contig2723,IFM26_S8_Contig204
SFC17_S7_L001_Contig1714	Cluster-10.525	0	0	0	0	1	NA	SFC17_S7_L001_Contig1714
SFM-1_S11_L001_Contig2080	Cluster-10.526	0.197	-0.845	2.389	-0.354	0.724	NA	SFM-1_S11_L001_Contig2080
IFC66_S31_L002_Contig1852	Cluster-10.528	0	0	0	0	1	NA	IFC66_S31_L002_Contig1852
SFM-6_S3_L001_Contig2005	Cluster-10.529	0.01	-0.037	2.392	-0.015	0.988	NA	SFM-6_S3_L001_Contig2005
SFU2_S5_L001_Contig1719	Cluster-10.531	0.29	-3.284	2.357	-1.393	0.164	NA	SFU2_S5_L001_Contig1719
SXC2_S4_L001_Contig225,IFM058_S13_Contig877	Cluster-10.534	0.466	1.367	1.771	0.772	0.44	NA	SXC2_S4_L001_Contig225,IFM058_S13_Contig877
IFM-049_S6_Contig31025	Cluster-10.536	0	0	0	0	1	NA	IFM-049_S6_Contig31025
SFC22_S9_L001_Contig3200	Cluster-10.538	0.423	-1.519	1.625	-0.935	0.35	NA	SFC22_S9_L001_Contig3200
IFM27_S9_Contig531	Cluster-10.540	0.223	-1.931	2.382	-0.811	0.418	NA	IFM27_S9_Contig531
SFC14_S17_L001_Contig507	Cluster-10.541	0.296	-0.044	2.191	-0.02	0.984	NA	SFC14_S17_L001_Contig507
SFM-3_S12_L001_Contig1464,SFC13_S23_L002_Contig1757,SFC13_S23_L002_Contig2152	Cluster-10.545	0.033	-1.488	2.389	-0.623	0.533	NA	SFM-3_S12_L001_Contig1464,SFC13_S23_L002_Contig1757,SFC13_S23_L002_Contig2152
SFC17_S7_L001_Contig1950,SFC17_S7_L001_Contig359,SFC14_S17_L001_Contig231,SFU-3_S21_L002_Contig1754,SFU-3_S21_L002_5347_soapGraphK61,SFU-3_S21_L002_Contig528	Cluster-10.552	0.631	2.932	2.178	1.346	0.178	NA	SFC17_S7_L001_Contig1950,SFC17_S7_L001_Contig359,SFC14_S17_L001_Contig231,SFU-3_S21_L002_Contig1754,SFU-3_S21_L002_5347_soapGraphK61,SFU-3_S21_L002_Contig528
SFM-8_S8_L001_Contig3563,IFM57_S30_L002_Contig1545,IFM57_S30_L002_4300_soapGraphK61	Cluster-10.554	0.632	-1.55	1.655	-0.937	0.349	NA	SFM-8_S8_L001_Contig3563,IFM57_S30_L002_Contig1545,IFM57_S30_L002_4300_soapGraphK61
SFC15-CM_S29_L002_Contig1449	Cluster-10.555	0.388	0.22	1.693	0.13	0.897	NA	SFC15-CM_S29_L002_Contig1449
IFC66_S31_L002_Contig1528,IFC66_S31_L002_4942_soapGraphK61	Cluster-10.557	0	0	0	0	1	NA	IFC66_S31_L002_Contig1528,IFC66_S31_L002_4942_soapGraphK61
SFM-1_S11_L001_Contig1590	Cluster-10.559	0.194	2.074	2.279	0.91	0.363	NA	SFM-1_S11_L001_Contig1590
SFC-21_S22_L002_Contig2684	Cluster-10.561	0.196	1.939	2.348	0.826	0.409	NA	SFC-21_S22_L002_Contig2684
IFD6_S1_Contig715	Cluster-10.562	0.032	-1.467	2.389	-0.614	0.539	NA	IFD6_S1_Contig715
IFC66_S31_L002_Contig1827	Cluster-10.563	0.213	-1.914	2.382	-0.803	0.422	NA	IFC66_S31_L002_Contig1827
IFM12_S16_Contig342,IFM57_S30_L002_Contig1546,IFM57_S30_L002_Contig1320	Cluster-10.564	0.019	-1.21	2.392	-0.506	0.613	NA	IFM12_S16_Contig342,IFM57_S30_L002_Contig1546,IFM57_S30_L002_Contig1320
SFC22_S9_L001_Contig3160	Cluster-10.565	0.145	1.044	2.325	0.449	0.653	NA	SFC22_S9_L001_Contig3160
IFD6_S1_Contig604	Cluster-10.566	0.562	-2.661	2.345	-1.135	0.257	NA	IFD6_S1_Contig604
IFC66_S31_L002_Contig1809	Cluster-10.567	0.02	0.043	2.391	0.018	0.986	NA	IFC66_S31_L002_Contig1809
SFM-6_S3_L001_Contig1995	Cluster-10.569	0.431	0.838	2.223	0.377	0.706	NA	SFM-6_S3_L001_Contig1995
SFC13_S23_L002_Contig2744	Cluster-10.570	0.22	1.001	2.335	0.429	0.668	NA	SFC13_S23_L002_Contig2744
IFM23_S4_Contig341	Cluster-10.573	0.041	0.782	2.381	0.328	0.743	NA	IFM23_S4_Contig341
IFM57_S30_L002_Contig865,SFC22_S9_L001_Contig2114,SFC22_S9_L001_8782_soapGraphK61,SFC22_S9_L001_Contig2395	Cluster-10.574	0.072	-1.938	2.382	-0.814	0.416	NA	IFM57_S30_L002_Contig865,SFC22_S9_L001_Contig2114,SFC22_S9_L001_8782_soapGraphK61,SFC22_S9_L001_Contig2395
SFC-21_S22_L002_Contig2160	Cluster-10.575	0.251	-1.534	2.344	-0.655	0.513	NA	SFC-21_S22_L002_Contig2160
IFM26_S8_Contig141	Cluster-10.578	0.032	-1.467	2.389	-0.614	0.539	NA	IFM26_S8_Contig141
SXC2_S4_L001_Contig1007	Cluster-10.580	0.237	-2.239	2.317	-0.967	0.334	NA	SXC2_S4_L001_Contig1007
IFM23_S4_Contig137	Cluster-10.584	0.009	-0.084	2.392	-0.035	0.972	NA	IFM23_S4_Contig137
SFM-6_S3_L001_Contig2013	Cluster-10.586	0	0	0	0	1	NA	SFM-6_S3_L001_Contig2013
SFC16_S6_L001_Contig1621	Cluster-10.589	0.436	0.636	2.309	0.276	0.783	NA	SFC16_S6_L001_Contig1621
IFC66_S31_L002_5168_soapGraphK61,IFC66_S31_L002_Contig1576	Cluster-10.590	0.315	-2.9	2.285	-1.269	0.204	NA	IFC66_S31_L002_5168_soapGraphK61,IFC66_S31_L002_Contig1576
SXC2_S4_L001_Contig581	Cluster-10.594	0.431	0.569	2.046	0.278	0.781	NA	SXC2_S4_L001_Contig581
SFM-8_S8_L001_Contig3558	Cluster-10.595	0.218	-0.799	2.34	-0.341	0.733	NA	SFM-8_S8_L001_Contig3558
SFC-21_S22_L002_Contig2487	Cluster-10.596	0.009	-0.991	2.394	-0.414	0.679	NA	SFC-21_S22_L002_Contig2487
SXC2_S4_L001_Contig1876	Cluster-10.598	0.128	-2.495	2.371	-1.052	0.293	NA	SXC2_S4_L001_Contig1876
SFM-3_S12_L001_Contig1101,SFC22_S9_L001_Contig2839,SFC13_S23_L002_Contig2740,SFC13_S23_L002_Contig2461,SFC13_S23_L002_Contig2751	Cluster-10.599	0.463	-2.37	2.196	-1.079	0.28	NA	SFM-3_S12_L001_Contig1101,SFC22_S9_L001_Contig2839,SFC13_S23_L002_Contig2740,SFC13_S23_L002_Contig2461,SFC13_S23_L002_Contig2751
IFM050_S11_Contig3433	Cluster-10.604	0.574	-3.132	2.36	-1.327	0.184	NA	IFM050_S11_Contig3433
SFU-3_S21_L002_Contig2026	Cluster-10.606	0.242	1.848	2.341	0.79	0.43	NA	SFU-3_S21_L002_Contig2026
IFC66_S31_L002_Contig1841	Cluster-10.607	0.029	-1.173	2.393	-0.49	0.624	NA	IFC66_S31_L002_Contig1841
IFM050_S11_Contig3439,IFM050_S11_8278_soapGraphK61,IFD6_S1_Contig512,IFM050_S11_Contig2148,SFU-3_S21_L002_Contig1976	Cluster-10.608	0.416	-1.356	2.318	-0.585	0.558	NA	IFM050_S11_Contig3439,IFM050_S11_8278_soapGraphK61,IFD6_S1_Contig512,IFM050_S11_Contig2148,SFU-3_S21_L002_Contig1976
SFC-21_S22_L002_Contig2695	Cluster-10.610	0.407	-1.316	2.37	-0.555	0.579	NA	SFC-21_S22_L002_Contig2695
IFM27_S9_Contig627	Cluster-10.613	0.487	-3.03	1.897	-1.597	0.11	NA	IFM27_S9_Contig627
SFU2_S5_L001_25699_soapGraphK21,SFU2_S5_L001_Contig1113	Cluster-10.621	0.065	-0.076	2.375	-0.032	0.974	NA	SFU2_S5_L001_25699_soapGraphK21,SFU2_S5_L001_Contig1113
SFU2_S5_L001_Contig1466	Cluster-10.623	0	0	0	0	1	NA	SFU2_S5_L001_Contig1466
IFM12_S16_Contig534	Cluster-10.624	0.032	-0.101	2.39	-0.042	0.966	NA	IFM12_S16_Contig534
IFM26_S8_Contig162	Cluster-10.626	0.163	0.477	2.061	0.231	0.817	NA	IFM26_S8_Contig162
SFM-6_S3_L001_Contig1867	Cluster-10.629	0.343	-1.415	1.759	-0.804	0.421	NA	SFM-6_S3_L001_Contig1867
SFM-6_S3_L001_Contig2010	Cluster-10.630	0.098	1.569	2.364	0.663	0.507	NA	SFM-6_S3_L001_Contig2010
SFC16_S6_L001_Contig1757	Cluster-10.631	0.243	2.467	2.346	1.051	0.293	NA	SFC16_S6_L001_Contig1757
SFM-8_S8_L001_Contig2524	Cluster-10.632	0.298	0.904	2.324	0.389	0.697	NA	SFM-8_S8_L001_Contig2524
IFM27_S9_Contig533,IFM14_S7_Contig211	Cluster-10.634	0.155	-1.389	1.828	-0.76	0.447	NA	IFM27_S9_Contig533,IFM14_S7_Contig211
SFM-6_S3_L001_Contig2020	Cluster-10.636	0.077	1.332	2.37	0.562	0.574	NA	SFM-6_S3_L001_Contig2020
SFC16_S6_L001_Contig1004	Cluster-10.637	0.425	3.076	2.29	1.343	0.179	NA	SFC16_S6_L001_Contig1004
SFC22_S9_L001_Contig2324	Cluster-10.639	0.458	1.055	2.311	0.456	0.648	NA	SFC22_S9_L001_Contig2324
SFC-18_S20_L002_Contig645	Cluster-10.643	0.532	-0.608	1.473	-0.413	0.68	NA	SFC-18_S20_L002_Contig645
SFM-8_S8_L001_Contig3582,SFC22_S9_L001_Contig2817	Cluster-10.644	0.344	0.628	2.316	0.271	0.786	NA	SFM-8_S8_L001_Contig3582,SFC22_S9_L001_Contig2817
IFM57_S30_L002_Contig1293	Cluster-10.646	0.211	-1.134	2.342	-0.484	0.628	NA	IFM57_S30_L002_Contig1293
IFM24_S5_Contig811	Cluster-10.647	0.25	2.569	2.232	1.151	0.25	NA	IFM24_S5_Contig811
IFM57_S30_L002_Contig1532,IFM57_S30_L002_4198_soapGraphK61	Cluster-10.648	0.002	-0.674	2.396	-0.281	0.778	NA	IFM57_S30_L002_Contig1532,IFM57_S30_L002_4198_soapGraphK61
SFM-8_S8_L001_Contig3112,SFM-8_S8_L001_10140_soapGraphK61	Cluster-10.649	0	0	0	0	1	NA	SFM-8_S8_L001_Contig3112,SFM-8_S8_L001_10140_soapGraphK61
SFM-8_S8_L001_10184_soapGraphK61	Cluster-10.650	0.17	-2.162	2.36	-0.916	0.36	NA	SFM-8_S8_L001_10184_soapGraphK61
SFC22_S9_L001_Contig3156	Cluster-10.651	0.184	0.974	2.342	0.416	0.677	NA	SFC22_S9_L001_Contig3156
IFM-049_S6_Contig32606,IFC66_S31_L002_Contig648,IFM-049_S6_Contig15947,IFM-049_S6_Contig33295,IFM-049_S6_Contig10010	Cluster-10.656	0.333	-3.203	2.311	-1.386	0.166	NA	IFM-049_S6_Contig32606,IFC66_S31_L002_Contig648,IFM-049_S6_Contig15947,IFM-049_S6_Contig33295,IFM-049_S6_Contig10010
SFM-1_S11_L001_Contig1540	Cluster-10.658	0.254	-0.303	2.262	-0.134	0.894	NA	SFM-1_S11_L001_Contig1540
IFM26_S8_Contig222	Cluster-10.661	0.575	1.562	1.767	0.884	0.377	NA	IFM26_S8_Contig222
SFM-8_S8_L001_Contig3605	Cluster-10.662	0	0	0	0	1	NA	SFM-8_S8_L001_Contig3605
SFM-8_S8_L001_Contig3053	Cluster-10.665	0.081	-1.914	2.382	-0.803	0.422	NA	SFM-8_S8_L001_Contig3053
IFM061_S15_Contig516,SFU2_S5_L001_Contig1078	Cluster-10.668	0.464	-0.723	1.985	-0.364	0.716	NA	IFM061_S15_Contig516,SFU2_S5_L001_Contig1078
SFM-3_S12_L001_Contig1960	Cluster-10.669	0.176	1.459	2.349	0.621	0.535	NA	SFM-3_S12_L001_Contig1960
SFM-8_S8_L001_10474_soapGraphK61,SFM-8_S8_L001_Contig2469,SFM-8_S8_L001_Contig609	Cluster-10.676	0.019	-1.227	2.392	-0.513	0.608	NA	SFM-8_S8_L001_10474_soapGraphK61,SFM-8_S8_L001_Contig2469,SFM-8_S8_L001_Contig609
SFC-18_S20_L002_Contig428	Cluster-10.678	0.069	1.159	2.374	0.488	0.625	NA	SFC-18_S20_L002_Contig428
SFM-8_S8_L001_25596_soapGraphK41,SFM-8_S8_L001_Contig3154	Cluster-10.679	0.092	1.404	2.369	0.593	0.553	NA	SFM-8_S8_L001_25596_soapGraphK41,SFM-8_S8_L001_Contig3154
IFD6_S1_Contig878,IFD6_S1_Contig543	Cluster-10.683	0.651	-4.136	2.345	-1.764	0.0778	NA	IFD6_S1_Contig878,IFD6_S1_Contig543
IFM050_S11_Contig3445	Cluster-10.684	0.627	-1.492	1.856	-0.804	0.422	NA	IFM050_S11_Contig3445
IFM26_S8_Contig136	Cluster-10.685	0.027	0.493	2.386	0.207	0.836	NA	IFM26_S8_Contig136
SFM-6_S3_L001_Contig1024	Cluster-10.686	0.026	0.043	2.391	0.018	0.986	NA	SFM-6_S3_L001_Contig1024
IFM050_S11_Contig3757	Cluster-10.687	0	0	0	0	1	NA	IFM050_S11_Contig3757
SFM-7_S13_L001_Contig2106,SFC-025_S33_L002_20786_soapGraphK21	Cluster-10.688	0	0	0	0	1	NA	SFM-7_S13_L001_Contig2106,SFC-025_S33_L002_20786_soapGraphK21
SFM-7_S13_L001_Contig2115	Cluster-10.689	0.09	-1.618	2.387	-0.678	0.498	NA	SFM-7_S13_L001_Contig2115
SFC15-CM_S29_L002_Contig1965	Cluster-10.691	0.134	1.777	2.357	0.754	0.451	NA	SFC15-CM_S29_L002_Contig1965
IFM23_S4_Contig666	Cluster-10.692	0.009	-0.084	2.392	-0.035	0.972	NA	IFM23_S4_Contig666
SFC22_S9_L001_Contig3216	Cluster-10.693	0.026	0.043	2.391	0.018	0.986	NA	SFC22_S9_L001_Contig3216
SFC15-CM_S29_L002_Contig1361	Cluster-10.695	0.036	0.692	2.383	0.29	0.772	NA	SFC15-CM_S29_L002_Contig1361
SFC15-CM_S29_L002_13976_soapGraphK41	Cluster-10.696	0.298	1.503	2.107	0.713	0.476	NA	SFC15-CM_S29_L002_13976_soapGraphK41
IFM27_S9_Contig609	Cluster-10.697	0.546	-1.801	1.825	-0.987	0.324	NA	IFM27_S9_Contig609
SFC15-CM_S29_L002_Contig1749	Cluster-10.698	0	0	0	0	1	NA	SFC15-CM_S29_L002_Contig1749
IFM-049_S6_Contig34013	Cluster-10.699	0.097	0.324	2.29	0.141	0.888	NA	IFM-049_S6_Contig34013
IFM21_S3_Contig557	Cluster-10.700	0.256	-0.469	2.258	-0.208	0.835	NA	IFM21_S3_Contig557
SFM-3_S12_L001_Contig1980	Cluster-10.705	0.22	2.308	2.349	0.983	0.326	NA	SFM-3_S12_L001_Contig1980
SFM-7_S13_L001_Contig933	Cluster-10.706	0.287	-1.442	2.087	-0.691	0.49	NA	SFM-7_S13_L001_Contig933
SFM-7_S13_L001_Contig2134,SFM-7_S13_L001_16441_soapGraphK41	Cluster-10.709	0.049	-1.449	2.389	-0.607	0.544	NA	SFM-7_S13_L001_Contig2134,SFM-7_S13_L001_16441_soapGraphK41
SFM-8_S8_L001_10470_soapGraphK61,SFM-8_S8_L001_Contig3149,IFM57_S30_L002_4466_soapGraphK61,IFM57_S30_L002_Contig1536,IFM57_S30_L002_Contig1548,SFM-8_S8_L001_Contig2436,IFM57_S30_L002_Contig1534,SFM-8_S8_L001_Contig2478	Cluster-10.711	0.427	-0.433	1.659	-0.261	0.794	NA	SFM-8_S8_L001_10470_soapGraphK61,SFM-8_S8_L001_Contig3149,IFM57_S30_L002_4466_soapGraphK61,IFM57_S30_L002_Contig1536,IFM57_S30_L002_Contig1548,SFM-8_S8_L001_Contig2436,IFM57_S30_L002_Contig1534,SFM-8_S8_L001_Contig2478
IFM050_S11_Contig3774	Cluster-10.715	0.043	-1.583	2.387	-0.663	0.507	NA	IFM050_S11_Contig3774
SFM-7_S13_L001_Contig1864,SFC15-CM_S29_L002_Contig1921,SXC2_S4_L001_Contig1674	Cluster-10.720	0.574	0.821	2.303	0.356	0.722	NA	SFM-7_S13_L001_Contig1864,SFC15-CM_S29_L002_Contig1921,SXC2_S4_L001_Contig1674
SFU-3_S21_L002_Contig1454	Cluster-10.723	0.227	1.367	2.274	0.601	0.548	NA	SFU-3_S21_L002_Contig1454
SFM-6_S3_L001_Contig1076,IFM26_S8_Contig326	Cluster-10.727	0.236	2.359	2.346	1.006	0.315	NA	SFM-6_S3_L001_Contig1076,IFM26_S8_Contig326
IFM12_S16_Contig706	Cluster-10.728	0.061	0.803	2.381	0.337	0.736	NA	IFM12_S16_Contig706
SFM-7_S13_L001_Contig1552	Cluster-10.734	0.398	0.093	2.31	0.04	0.968	NA	SFM-7_S13_L001_Contig1552
SFM-7_S13_L001_Contig1898,SFC15-CM_S29_L002_Contig1974,SFM-7_S13_L001_Contig1887,SFM-7_S13_L001_5268_soapGraphK61,SFC15-CM_S29_L002_Contig1745	Cluster-10.735	0.116	-0.394	2.362	-0.167	0.868	NA	SFM-7_S13_L001_Contig1898,SFC15-CM_S29_L002_Contig1974,SFM-7_S13_L001_Contig1887,SFM-7_S13_L001_5268_soapGraphK61,SFC15-CM_S29_L002_Contig1745
IFM26_S8_Contig646	Cluster-10.738	0.163	-2.904	2.165	-1.341	0.18	NA	IFM26_S8_Contig646
SFU-3_S21_L002_Contig552	Cluster-10.740	0.201	1.82	2.262	0.805	0.421	NA	SFU-3_S21_L002_Contig552
IFC66_S31_L002_Contig1542	Cluster-10.741	0.032	0.043	2.391	0.018	0.986	NA	IFC66_S31_L002_Contig1542
SFU-3_S21_L002_Contig953	Cluster-10.742	0.389	2.975	2.34	1.272	0.204	NA	SFU-3_S21_L002_Contig953
IFM054_S12_Contig989,IFM047_S10_Contig693	Cluster-10.743	0.174	-2.775	2.366	-1.173	0.241	NA	IFM054_S12_Contig989,IFM047_S10_Contig693
SFM-6_S3_L001_Contig1463	Cluster-10.744	0.149	-0.912	2.203	-0.414	0.679	NA	SFM-6_S3_L001_Contig1463
IFM12_S16_Contig295,SFM-6_S3_L001_Contig1083,IFM12_S16_Contig384,IFM12_S16_16963_soapGraphK41	Cluster-10.745	0.159	-1.737	2.362	-0.735	0.462	NA	IFM12_S16_Contig295,SFM-6_S3_L001_Contig1083,IFM12_S16_Contig384,IFM12_S16_16963_soapGraphK41
SFC22_S9_L001_Contig3224,SFM-8_S8_L001_Contig2503,IFM57_S30_L002_Contig1710,IFM57_S30_L002_Contig1315	Cluster-10.748	0.219	1.377	2.249	0.612	0.54	NA	SFC22_S9_L001_Contig3224,SFM-8_S8_L001_Contig2503,IFM57_S30_L002_Contig1710,IFM57_S30_L002_Contig1315
SXC2_S4_L001_Contig1425,IFM058_S13_Contig1008,IFM23_S4_Contig502	Cluster-10.750	0.432	-3.717	2.351	-1.581	0.114	NA	SXC2_S4_L001_Contig1425,IFM058_S13_Contig1008,IFM23_S4_Contig502
IFM050_S11_Contig3693	Cluster-10.751	0.227	-1.14	2.341	-0.487	0.626	NA	IFM050_S11_Contig3693
SFM-1_S11_L001_Contig1613	Cluster-10.752	0.033	-1.488	2.389	-0.623	0.533	NA	SFM-1_S11_L001_Contig1613
SFC15-CM_S29_L002_Contig1975,SFC15-CM_S29_L002_Contig1961,SFC17_S7_L001_Contig2021	Cluster-10.754	0.447	-1.655	1.972	-0.839	0.401	NA	SFC15-CM_S29_L002_Contig1975,SFC15-CM_S29_L002_Contig1961,SFC17_S7_L001_Contig2021
SFC14_S17_L001_9924_soapGraphK51,SFU-3_S21_L002_Contig2030,SFC14_S17_L001_Contig1087	Cluster-10.755	0.537	1.286	2.309	0.557	0.578	NA	SFC14_S17_L001_9924_soapGraphK51,SFU-3_S21_L002_Contig2030,SFC14_S17_L001_Contig1087
SFM-3_S12_L001_Contig1982	Cluster-10.763	0.264	2.516	2.346	1.073	0.283	NA	SFM-3_S12_L001_Contig1982
IFM12_S16_Contig822	Cluster-10.765	0.202	2.194	2.349	0.934	0.35	NA	IFM12_S16_Contig822
SFC17_S7_L001_Contig1750,IFC66_S31_L002_Contig1559,IFC66_S31_L002_5316_soapGraphK61,IFC66_S31_L002_Contig1544,IFC66_S31_L002_Contig1543	Cluster-10.769	0.594	2.943	1.959	1.503	0.133	NA	SFC17_S7_L001_Contig1750,IFC66_S31_L002_Contig1559,IFC66_S31_L002_5316_soapGraphK61,IFC66_S31_L002_Contig1544,IFC66_S31_L002_Contig1543
SFM-3_S12_L001_Contig1762,SFM-3_S12_L001_5262_soapGraphK61	Cluster-10.772	0.54	3.326	2.336	1.424	0.155	NA	SFM-3_S12_L001_Contig1762,SFM-3_S12_L001_5262_soapGraphK61
SFM-6_S3_L001_Contig1753,IFM53_S14_L001_Contig1680,IFM53_S14_L001_Contig2679	Cluster-10.773	0.134	-1.672	2.365	-0.707	0.479	NA	SFM-6_S3_L001_Contig1753,IFM53_S14_L001_Contig1680,IFM53_S14_L001_Contig2679
SFC22_S9_L001_Contig2836	Cluster-10.774	0.068	-0.544	2.385	-0.228	0.819	NA	SFC22_S9_L001_Contig2836
SFU-3_S21_L002_Contig2023	Cluster-10.775	0	0	0	0	1	NA	SFU-3_S21_L002_Contig2023
SFC17_S7_L001_Contig1748	Cluster-10.782	0.548	-3.258	2.287	-1.425	0.154	NA	SFC17_S7_L001_Contig1748
IFM12_S16_Contig99	Cluster-10.783	0.161	-2.116	2.309	-0.916	0.36	NA	IFM12_S16_Contig99
IFM57_S30_L002_Contig1677	Cluster-10.784	0.003	-0.747	2.396	-0.312	0.755	NA	IFM57_S30_L002_Contig1677
IFM12_S16_35044_soapGraphK31	Cluster-10.787	0.211	2.323	2.349	0.989	0.323	NA	IFM12_S16_35044_soapGraphK31
SFC-21_S22_L002_Contig1721	Cluster-10.788	0.106	-0.048	2.378	-0.02	0.984	NA	SFC-21_S22_L002_Contig1721
SFC-21_S22_L002_Contig2607	Cluster-10.789	0.193	-1.236	2.392	-0.517	0.605	NA	SFC-21_S22_L002_Contig2607
SFC22_S9_L001_Contig2351	Cluster-10.797	0.083	-2.157	2.378	-0.907	0.364	NA	SFC22_S9_L001_Contig2351
SFC-21_S22_L002_Contig1079	Cluster-10.798	0.498	-0.492	2.199	-0.224	0.823	NA	SFC-21_S22_L002_Contig1079
SFM-1_S11_L001_Contig1596	Cluster-10.800	0.135	-1.875	2.383	-0.787	0.431	NA	SFM-1_S11_L001_Contig1596
IFM14_S7_Contig297	Cluster-10.801	0.07	0.404	2.373	0.17	0.865	NA	IFM14_S7_Contig297
SFC17_S7_L001_Contig1432	Cluster-10.804	0.071	-0.372	2.383	-0.156	0.876	NA	SFC17_S7_L001_Contig1432
IFD6_S1_Contig947	Cluster-10.805	0.121	0.776	2.358	0.329	0.742	NA	IFD6_S1_Contig947
SFC-21_S22_L002_Contig427,IFD6_S1_Contig805,IFD6_S1_Contig295	Cluster-10.807	0.566	1.098	2.305	0.476	0.634	NA	SFC-21_S22_L002_Contig427,IFD6_S1_Contig805,IFD6_S1_Contig295
IFM050_S11_Contig3688	Cluster-10.809	0.041	-1.173	2.393	-0.49	0.624	NA	IFM050_S11_Contig3688
SFC22_S9_L001_Contig1606	Cluster-10.811	0.611	-0.77	1.853	-0.415	0.678	NA	SFC22_S9_L001_Contig1606
IFM12_S16_Contig848	Cluster-10.812	0.229	-3.3	1.962	-1.682	0.0926	NA	IFM12_S16_Contig848
IFM054_S12_Contig973,IFM047_S10_Contig1639,IFM047_S10_Contig1430	Cluster-10.813	0.54	-3.101	2.293	-1.352	0.176	NA	IFM054_S12_Contig973,IFM047_S10_Contig1639,IFM047_S10_Contig1430
IFM050_S11_Contig3792	Cluster-10.816	0.268	-2.796	2.174	-1.286	0.199	NA	IFM050_S11_Contig3792
IFC66_S31_L002_Contig1552	Cluster-10.817	0.011	-0.017	2.392	-0.007	0.994	NA	IFC66_S31_L002_Contig1552
SFM-1_S11_L001_Contig770	Cluster-10.819	0.6	-2.14	2.07	-1.034	0.301	NA	SFM-1_S11_L001_Contig770
SFC14_S17_L001_23355_soapGraphK31	Cluster-10.820	0.191	1.663	2.345	0.709	0.478	NA	SFC14_S17_L001_23355_soapGraphK31
SFM-1_S11_L001_16206_soapGraphK41,SFM-1_S11_L001_Contig1214	Cluster-10.821	0.167	2.104	2.352	0.894	0.371	NA	SFM-1_S11_L001_16206_soapGraphK41,SFM-1_S11_L001_Contig1214
SFM-1_S11_L001_5116_soapGraphK61,SFM-1_S11_L001_Contig1232	Cluster-10.823	0.131	0.107	2.354	0.046	0.964	NA	SFM-1_S11_L001_5116_soapGraphK61,SFM-1_S11_L001_Contig1232
SFM-1_S11_L001_Contig1870	Cluster-10.830	0.319	-1.303	2.329	-0.56	0.576	NA	SFM-1_S11_L001_Contig1870
IFM-049_S6_Contig39910	Cluster-10.832	0.047	0.669	2.38	0.281	0.779	NA	IFM-049_S6_Contig39910
SFC-023_S32_L002_Contig1155	Cluster-10.833	0.312	-1.272	2.231	-0.57	0.569	NA	SFC-023_S32_L002_Contig1155
SFC-18_S20_L002_Contig1891	Cluster-10.834	0.027	0.491	2.386	0.206	0.837	NA	SFC-18_S20_L002_Contig1891
IFM21_S3_Contig40,IFM14_S7_Contig236	Cluster-10.837	0.205	-2.007	2.357	-0.852	0.394	NA	IFM21_S3_Contig40,IFM14_S7_Contig236
SFC-18_S20_L002_Contig968	Cluster-10.840	0.314	-0.064	2.005	-0.032	0.975	NA	SFC-18_S20_L002_Contig968
SFM-8_S8_L001_Contig3434	Cluster-10.850	0.558	-0.897	1.866	-0.481	0.631	NA	SFM-8_S8_L001_Contig3434
SFM-1_S11_L001_Contig369	Cluster-10.854	0.215	1.539	2.256	0.682	0.495	NA	SFM-1_S11_L001_Contig369
SFC17_S7_L001_5523_soapGraphK61,SFC17_S7_L001_Contig1735	Cluster-10.859	0.305	1.002	2.22	0.451	0.652	NA	SFC17_S7_L001_5523_soapGraphK61,SFC17_S7_L001_Contig1735
SFU2_S5_L001_Contig1470	Cluster-10.861	0.23	-3.028	2.362	-1.282	0.2	NA	SFU2_S5_L001_Contig1470
SFC19_S24_L002_Contig1553	Cluster-10.863	0.51	1.826	1.863	0.98	0.327	NA	SFC19_S24_L002_Contig1553
SFC22_S9_L001_Contig3210,SFM-8_S8_L001_Contig3606,SFC22_S9_L001_Contig2841,SFC22_S9_L001_8746_soapGraphK61	Cluster-10.864	0.65	2.588	1.682	1.539	0.124	NA	SFC22_S9_L001_Contig3210,SFM-8_S8_L001_Contig3606,SFC22_S9_L001_Contig2841,SFC22_S9_L001_8746_soapGraphK61
SFC19_S24_L002_Contig1142	Cluster-10.867	0.215	-1.099	1.905	-0.577	0.564	NA	SFC19_S24_L002_Contig1142
SFM-7_S13_L001_5198_soapGraphK61,SFM-7_S13_L001_Contig1890	Cluster-10.868	0.175	-2.272	2.281	-0.996	0.319	NA	SFM-7_S13_L001_5198_soapGraphK61,SFM-7_S13_L001_Contig1890
IFM050_S11_Contig3667	Cluster-10.871	0.2	-0.697	2.387	-0.292	0.77	NA	IFM050_S11_Contig3667
SFC16_S6_L001_Contig1792,SFM-6_S3_L001_5521_soapGraphK61,SFM-6_S3_L001_Contig634	Cluster-10.879	0.459	-0.245	2.217	-0.11	0.912	NA	SFC16_S6_L001_Contig1792,SFM-6_S3_L001_5521_soapGraphK61,SFM-6_S3_L001_Contig634
IFM26_S8_Contig418	Cluster-10.882	0.304	2.646	2.331	1.135	0.256	NA	IFM26_S8_Contig418
SFM-8_S8_L001_Contig2477	Cluster-10.883	0.197	0.285	2.335	0.122	0.903	NA	SFM-8_S8_L001_Contig2477
SFU-3_S21_L002_Contig1950	Cluster-10.885	0.526	-1.358	2.081	-0.652	0.514	NA	SFU-3_S21_L002_Contig1950
SFM-8_S8_L001_Contig2433,SFM-8_S8_L001_Contig3565,SFC22_S9_L001_Contig3218	Cluster-10.887	0.469	-2.811	2.286	-1.23	0.219	NA	SFM-8_S8_L001_Contig2433,SFM-8_S8_L001_Contig3565,SFC22_S9_L001_Contig3218
IFM-049_S6_Contig39443,SFC17_S7_L001_Contig1426,IFM060_S14_Contig298	Cluster-10.888	0.587	-2.239	2.32	-0.965	0.335	NA	IFM-049_S6_Contig39443,SFC17_S7_L001_Contig1426,IFM060_S14_Contig298
SFC-025_S33_L002_Contig1007,SFM-7_S13_L001_Contig2131	Cluster-10.889	0.02	0.043	2.391	0.018	0.986	NA	SFC-025_S33_L002_Contig1007,SFM-7_S13_L001_Contig2131
SFC16_S6_L001_Contig388	Cluster-10.895	0.61	-0.259	2.088	-0.124	0.901	NA	SFC16_S6_L001_Contig388
SFC-18_S20_L002_Contig655,IFM26_S8_Contig342	Cluster-10.897	0.549	-0.921	1.74	-0.53	0.596	NA	SFC-18_S20_L002_Contig655,IFM26_S8_Contig342
SFM-8_S8_L001_Contig3601	Cluster-10.904	0.27	-1.024	2.118	-0.483	0.629	NA	SFM-8_S8_L001_Contig3601
SFC22_S9_L001_Contig814	Cluster-10.907	0.511	-2.114	1.965	-1.076	0.282	NA	SFC22_S9_L001_Contig814
SFM-10_S1_L001_Contig2559,SFM-10_S1_L001_Contig2208,SFM-10_S1_L001_Contig2264,SFC15-CM_S29_L002_4905_soapGraphK61,SFC15-CM_S29_L002_Contig1754,SFM-10_S1_L001_7063_soapGraphK61	Cluster-10.912	0.089	0.734	2.38	0.308	0.758	NA	SFM-10_S1_L001_Contig2559,SFM-10_S1_L001_Contig2208,SFM-10_S1_L001_Contig2264,SFC15-CM_S29_L002_4905_soapGraphK61,SFC15-CM_S29_L002_Contig1754,SFM-10_S1_L001_7063_soapGraphK61
IFC66_S31_L002_Contig1821	Cluster-10.915	0.339	3.122	2.061	1.515	0.13	NA	IFC66_S31_L002_Contig1821
SFC17_S7_L001_Contig2000	Cluster-10.917	0.042	-1.548	2.388	-0.648	0.517	NA	SFC17_S7_L001_Contig2000
SFC22_S9_L001_Contig3208	Cluster-10.918	0.005	-0.815	2.396	-0.34	0.734	NA	SFC22_S9_L001_Contig3208
SFC22_S9_L001_Contig2762	Cluster-10.923	0.052	0.803	2.381	0.337	0.736	NA	SFC22_S9_L001_Contig2762
IFM-049_S6_Contig34431,SFC17_S7_L001_Contig1980	Cluster-10.927	0.162	1.014	2.309	0.439	0.661	NA	IFM-049_S6_Contig34431,SFC17_S7_L001_Contig1980
SFC13_S23_L002_Contig2715	Cluster-10.936	0.576	-1.649	1.57	-1.05	0.294	NA	SFC13_S23_L002_Contig2715
IFM27_S9_Contig410	Cluster-10.938	0.041	0.043	2.391	0.018	0.986	NA	IFM27_S9_Contig410
SFC-025_S33_L002_Contig1132,SFC-025_S33_L002_Contig1492,SFM-7_S13_L001_5248_soapGraphK61,SFM-7_S13_L001_Contig1896	Cluster-10.947	0.19	0.456	2.341	0.195	0.846	NA	SFC-025_S33_L002_Contig1132,SFC-025_S33_L002_Contig1492,SFM-7_S13_L001_5248_soapGraphK61,SFM-7_S13_L001_Contig1896
SFC-21_S22_L002_Contig2705	Cluster-10.951	0.02	0.043	2.391	0.018	0.986	NA	SFC-21_S22_L002_Contig2705
SFM-3_S12_L001_Contig1972,SFC13_S23_L002_Contig2690	Cluster-10.952	0	0	0	0	1	NA	SFM-3_S12_L001_Contig1972,SFC13_S23_L002_Contig2690
IFM058_S13_Contig874	Cluster-10.955	0.172	2.082	2.353	0.885	0.376	NA	IFM058_S13_Contig874
SFU-3_S21_L002_Contig1029,SFC14_S17_L001_Contig625	Cluster-10.961	0.18	2.204	2.351	0.938	0.348	NA	SFU-3_S21_L002_Contig1029,SFC14_S17_L001_Contig625
SFU-3_S21_L002_Contig1983	Cluster-10.963	0	0	0	0	1	NA	SFU-3_S21_L002_Contig1983
SFM-6_S3_L001_16823_soapGraphK41,SFM-6_S3_L001_Contig1738	Cluster-10.966	0.434	-2.611	2.069	-1.262	0.207	NA	SFM-6_S3_L001_16823_soapGraphK41,SFM-6_S3_L001_Contig1738
IFM058_S13_Contig1011,SFC-18_S20_L002_Contig1719	Cluster-10.970	0.573	-1.224	1.972	-0.621	0.535	NA	IFM058_S13_Contig1011,SFC-18_S20_L002_Contig1719
SFU-3_S21_L002_Contig2015	Cluster-10.974	0.324	2.773	2.342	1.184	0.236	NA	SFU-3_S21_L002_Contig2015
SFU-3_S21_L002_Contig1961,SFC14_S17_L001_Contig2176	Cluster-10.976	0	0	0	0	1	NA	SFU-3_S21_L002_Contig1961,SFC14_S17_L001_Contig2176
SFU-3_S21_L002_Contig1459	Cluster-10.977	0.639	3.622	2.266	1.599	0.11	NA	SFU-3_S21_L002_Contig1459
SFU-3_S21_L002_Contig1476	Cluster-10.978	0.065	0.803	2.381	0.337	0.736	NA	SFU-3_S21_L002_Contig1476
SFU2_S5_L001_Contig676,SXC2_S4_L001_4700_soapGraphK61,SXC2_S4_L001_Contig1698	Cluster-10.982	0.59	2.886	1.914	1.508	0.132	NA	SFU2_S5_L001_Contig676,SXC2_S4_L001_4700_soapGraphK61,SXC2_S4_L001_Contig1698
SFC22_S9_L001_Contig3158	Cluster-10.984	0	0	0	0	1	NA	SFC22_S9_L001_Contig3158
IFM-049_S6_Contig1046	Cluster-10.985	0.503	-3.725	2.001	-1.862	0.0626	NA	IFM-049_S6_Contig1046
SFC-21_S22_L002_Contig1722	Cluster-10.986	0.033	-1.236	2.392	-0.517	0.605	NA	SFC-21_S22_L002_Contig1722
IFD6_S1_Contig77,SFC-21_S22_L002_Contig2703	Cluster-10.991	0.341	-0.948	1.99	-0.476	0.634	NA	IFD6_S1_Contig77,SFC-21_S22_L002_Contig2703
IFM27_S9_Contig510	Cluster-10.996	0.421	2.361	2.059	1.147	0.251	NA	IFM27_S9_Contig510
IFM050_S11_Contig3798	Cluster-10.999	0.529	-2.612	1.321	-1.977	0.0481	NA	IFM050_S11_Contig3798
SFC22_S9_L001_Contig2832	Cluster-10.1005	0	0	0	0	1	NA	SFC22_S9_L001_Contig2832
IFM050_S11_Contig1803	Cluster-10.1008	0	0	0	0	1	NA	IFM050_S11_Contig1803
IFM27_S9_Contig632	Cluster-10.1009	0.566	-2.669	1.64	-1.627	0.104	NA	IFM27_S9_Contig632
SFC13_S23_L002_Contig2709	Cluster-10.1013	0.233	-1.066	2.153	-0.495	0.621	NA	SFC13_S23_L002_Contig2709
SFM-3_S12_L001_Contig925	Cluster-10.1014	0.314	2.565	2.34	1.096	0.273	NA	SFM-3_S12_L001_Contig925
SFC13_S23_L002_Contig1899	Cluster-10.1016	0.571	1.51	1.68	0.899	0.369	NA	SFC13_S23_L002_Contig1899
IFM050_S11_Contig3736	Cluster-10.1018	0.424	-2.862	2.242	-1.277	0.202	NA	IFM050_S11_Contig3736
SFC-21_S22_L002_Contig735	Cluster-10.1021	0.165	-0.528	2.308	-0.229	0.819	NA	SFC-21_S22_L002_Contig735
SFM-7_S13_L001_Contig1884,SFM-7_S13_L001_5154_soapGraphK61	Cluster-10.1023	0.508	3.085	1.95	1.582	0.114	NA	SFM-7_S13_L001_Contig1884,SFM-7_S13_L001_5154_soapGraphK61
SFC-21_S22_L002_Contig1703	Cluster-10.1024	0.243	-1.914	2.382	-0.803	0.422	NA	SFC-21_S22_L002_Contig1703
IFC66_S31_L002_5304_soapGraphK61,IFC66_S31_L002_Contig1321	Cluster-10.1026	0.126	-0.098	2.247	-0.044	0.965	NA	IFC66_S31_L002_5304_soapGraphK61,IFC66_S31_L002_Contig1321
SFM-8_S8_L001_Contig3597,SFM-8_S8_L001_15835_soapGraphK51	Cluster-10.1035	0.054	0.202	2.377	0.085	0.932	NA	SFM-8_S8_L001_Contig3597,SFM-8_S8_L001_15835_soapGraphK51
IFM-049_S6_157765_soapGraphK61,IFM-049_S6_Contig16905	Cluster-10.1037	0.219	-0.036	2.151	-0.017	0.987	NA	IFM-049_S6_157765_soapGraphK61,IFM-049_S6_Contig16905
SFM-10_S1_L001_Contig1276	Cluster-10.1041	0.344	0.149	2.229	0.067	0.947	NA	SFM-10_S1_L001_Contig1276
SFC14_S17_L001_Contig1765	Cluster-10.1042	0.094	0.81	2.367	0.342	0.732	NA	SFC14_S17_L001_Contig1765
SFC22_S9_L001_Contig271,IFM047_S10_Contig1646	Cluster-10.1044	0.508	-0.485	1.769	-0.274	0.784	NA	SFC22_S9_L001_Contig271,IFM047_S10_Contig1646
SFC22_S9_L001_Contig2363,SFM-8_S8_L001_Contig3598,IFM57_S30_L002_Contig1698,IFM57_S30_L002_Contig1711	Cluster-10.1049	0.286	1.22	1.935	0.63	0.528	NA	SFC22_S9_L001_Contig2363,SFM-8_S8_L001_Contig3598,IFM57_S30_L002_Contig1698,IFM57_S30_L002_Contig1711
IFM57_S30_L002_Contig1550,IFM57_S30_L002_4448_soapGraphK61,SFM-8_S8_L001_Contig694	Cluster-10.1050	0.652	0.059	1.878	0.032	0.975	NA	IFM57_S30_L002_Contig1550,IFM57_S30_L002_4448_soapGraphK61,SFM-8_S8_L001_Contig694
IFC66_S31_L002_Contig1757	Cluster-10.1054	0.054	-0.404	2.387	-0.169	0.866	NA	IFC66_S31_L002_Contig1757
SFC13_S23_L002_Contig771,SFM-3_S12_L001_Contig1404,SFC13_S23_L002_Contig2714	Cluster-10.1055	0.025	-1.367	2.39	-0.572	0.567	NA	SFC13_S23_L002_Contig771,SFM-3_S12_L001_Contig1404,SFC13_S23_L002_Contig2714
SFC-023_S32_L002_Contig1162	Cluster-10.1061	0.07	1.141	2.375	0.48	0.631	NA	SFC-023_S32_L002_Contig1162
SFM-8_S8_L001_Contig3592,SFM-8_S8_L001_16151_soapGraphK51	Cluster-10.1062	0.022	-1.173	2.393	-0.49	0.624	NA	SFM-8_S8_L001_Contig3592,SFM-8_S8_L001_16151_soapGraphK51
SFM-8_S8_L001_Contig3584	Cluster-10.1064	0.188	-1.276	2.294	-0.556	0.578	NA	SFM-8_S8_L001_Contig3584
IFM058_S13_Contig449	Cluster-10.1067	0.485	2.356	1.96	1.202	0.229	NA	IFM058_S13_Contig449
IFC66_S31_L002_Contig1850	Cluster-10.1077	0.153	0.15	2.318	0.065	0.948	NA	IFC66_S31_L002_Contig1850
SFC-21_S22_L002_Contig1907	Cluster-10.1079	0	0	0	0	1	NA	SFC-21_S22_L002_Contig1907
SFU-3_S21_L002_Contig370	Cluster-10.1081	0.19	-0.364	2.27	-0.16	0.873	NA	SFU-3_S21_L002_Contig370
SFC15-CM_S29_L002_Contig1963	Cluster-10.1088	0.33	-1.71	2.327	-0.735	0.462	NA	SFC15-CM_S29_L002_Contig1963
SFC17_S7_L001_Contig1971	Cluster-10.1089	0.236	-2.471	2.103	-1.175	0.24	NA	SFC17_S7_L001_Contig1971
IFM058_S13_Contig858	Cluster-10.1092	0.073	0.209	2.377	0.088	0.93	NA	IFM058_S13_Contig858
SFC-21_S22_L002_Contig1685	Cluster-10.1101	0.013	-1.063	2.394	-0.444	0.657	NA	SFC-21_S22_L002_Contig1685
SFM-8_S8_L001_Contig3543,SFC22_S9_L001_Contig3199,IFM57_S30_L002_Contig1683,SFM-8_S8_L001_Contig3364,IFM57_S30_L002_Contig1514	Cluster-10.1105	0.342	1.337	2.323	0.576	0.565	NA	SFM-8_S8_L001_Contig3543,SFC22_S9_L001_Contig3199,IFM57_S30_L002_Contig1683,SFM-8_S8_L001_Contig3364,IFM57_S30_L002_Contig1514
SFM-3_S12_L001_Contig605,SFC13_S23_L002_Contig1342	Cluster-10.1106	0.551	1.94	2.083	0.931	0.352	NA	SFM-3_S12_L001_Contig605,SFC13_S23_L002_Contig1342
SFC-18_S20_L002_4660_soapGraphK61,SFC-18_S20_L002_Contig1723,IFM53_S14_L001_Contig2702	Cluster-10.1107	0.329	2.376	2.214	1.073	0.283	NA	SFC-18_S20_L002_4660_soapGraphK61,SFC-18_S20_L002_Contig1723,IFM53_S14_L001_Contig2702
SFC-18_S20_L002_Contig32	Cluster-10.1112	0.39	0.134	1.993	0.067	0.946	NA	SFC-18_S20_L002_Contig32
SFC16_S6_L001_Contig64	Cluster-10.1122	0.374	-0.761	2.227	-0.342	0.733	NA	SFC16_S6_L001_Contig64
SFC14_S17_L001_Contig514	Cluster-10.1124	0.349	1.788	2.307	0.775	0.438	NA	SFC14_S17_L001_Contig514
SXC2_S4_L001_Contig1332	Cluster-10.1126	0.286	-0.332	2.323	-0.143	0.886	NA	SXC2_S4_L001_Contig1332
SFM-7_S13_L001_Contig1891,SFC-025_S33_L002_Contig1675,SFC-025_S33_L002_Contig1869	Cluster-10.1137	0.041	-1.173	2.393	-0.49	0.624	NA	SFM-7_S13_L001_Contig1891,SFC-025_S33_L002_Contig1675,SFC-025_S33_L002_Contig1869
SFC-21_S22_L002_Contig1694	Cluster-10.1140	0	0	0	0	1	NA	SFC-21_S22_L002_Contig1694
SFC22_S9_L001_Contig2361,SFC22_S9_L001_Contig3226,SFM-8_S8_L001_Contig3572,IFM57_S30_L002_Contig964,IFM57_S30_L002_Contig999,IFM57_S30_L002_Contig741	Cluster-10.1159	0.647	-2.992	2.046	-1.462	0.144	NA	SFC22_S9_L001_Contig2361,SFC22_S9_L001_Contig3226,SFM-8_S8_L001_Contig3572,IFM57_S30_L002_Contig964,IFM57_S30_L002_Contig999,IFM57_S30_L002_Contig741
SFM-6_S3_L001_Contig1087	Cluster-10.1160	0.027	0.043	2.391	0.018	0.986	NA	SFM-6_S3_L001_Contig1087
IFC66_S31_L002_Contig1815	Cluster-10.1162	0.305	-3.796	1.936	-1.961	0.0499	NA	IFC66_S31_L002_Contig1815
SFC19_S24_L002_Contig1531,SFC19_S24_L002_Contig1509,IFC66_S31_L002_5258_soapGraphK61,IFC66_S31_L002_Contig1581	Cluster-10.1168	0	0	0	0	1	NA	SFC19_S24_L002_Contig1531,SFC19_S24_L002_Contig1509,IFC66_S31_L002_5258_soapGraphK61,IFC66_S31_L002_Contig1581
SFC19_S24_L002_Contig2102	Cluster-10.1171	0.009	-0.084	2.392	-0.035	0.972	NA	SFC19_S24_L002_Contig2102
SFM-7_S13_L001_Contig1877	Cluster-10.1173	0.351	1.245	2.321	0.537	0.592	NA	SFM-7_S13_L001_Contig1877
SFC19_S24_L002_Contig1140,IFM-049_S6_Contig6643,SFC19_S24_L002_Contig525	Cluster-10.1176	0.089	-0.914	2.38	-0.384	0.701	NA	SFC19_S24_L002_Contig1140,IFM-049_S6_Contig6643,SFC19_S24_L002_Contig525
SFM-6_S3_L001_Contig1742,SFM-6_S3_L001_22648_soapGraphK31	Cluster-10.1180	0.208	-2.455	2.246	-1.093	0.275	NA	SFM-6_S3_L001_Contig1742,SFM-6_S3_L001_22648_soapGraphK31
IFM26_S8_Contig84	Cluster-11.0	0	0	0	0	1	NA	IFM26_S8_Contig84
IFM26_S8_Contig176	Cluster-12.0	0	0	0	0	1	NA	IFM26_S8_Contig176
IFM26_S8_Contig444	Cluster-13.0	0	0	0	0	1	NA	IFM26_S8_Contig444
IFM26_S8_Contig446	Cluster-14.0	0	0	0	0	1	NA	IFM26_S8_Contig446
IFM26_S8_Contig97	Cluster-15.0	0	0	0	0	1	NA	IFM26_S8_Contig97
IFM26_S8_Contig315	Cluster-16.0	0	0	0	0	1	NA	IFM26_S8_Contig315
IFM26_S8_Contig634	Cluster-16.1	0	0	0	0	1	NA	IFM26_S8_Contig634
IFM26_S8_Contig334	Cluster-17.0	0	0	0	0	1	NA	IFM26_S8_Contig334
IFM26_S8_Contig435	Cluster-18.0	0	0	0	0	1	NA	IFM26_S8_Contig435
IFM26_S8_Contig434	Cluster-19.0	0	0	0	0	1	NA	IFM26_S8_Contig434
IFM23_S4_Contig637	Cluster-20.0	0	0	0	0	1	NA	IFM23_S4_Contig637
IFM23_S4_Contig578	Cluster-21.0	0	0	0	0	1	NA	IFM23_S4_Contig578
IFM23_S4_Contig641	Cluster-22.0	0	0	0	0	1	NA	IFM23_S4_Contig641
IFM23_S4_Contig337	Cluster-23.0	0	0	0	0	1	NA	IFM23_S4_Contig337
IFM23_S4_Contig443	Cluster-24.0	0.533	-3.848	2.349	-1.638	0.101	NA	IFM23_S4_Contig443
IFM23_S4_Contig565	Cluster-25.0	0	0	0	0	1	NA	IFM23_S4_Contig565
IFM12_S16_Contig529	Cluster-27.0	0	0	0	0	1	NA	IFM12_S16_Contig529
IFM12_S16_Contig378	Cluster-28.0	0.059	-1.863	2.383	-0.782	0.434	NA	IFM12_S16_Contig378
IFM12_S16_Contig537	Cluster-29.0	0.039	-1.578	2.388	-0.661	0.509	NA	IFM12_S16_Contig537
IFM12_S16_Contig826	Cluster-30.0	0.152	-1.914	2.382	-0.803	0.422	NA	IFM12_S16_Contig826
IFM12_S16_Contig815	Cluster-31.0	0.228	-2.921	2.363	-1.236	0.216	NA	IFM12_S16_Contig815
IFM058_S13_Contig666	Cluster-32.0	0.102	-2.291	2.375	-0.965	0.335	NA	IFM058_S13_Contig666
IFM12_S16_Contig169	Cluster-33.0	0.032	-1.173	2.393	-0.49	0.624	NA	IFM12_S16_Contig169
IFD6_S1_Contig148,IFM12_S16_Contig843	Cluster-33.1	0.069	-0.124	2.379	-0.052	0.958	NA	IFD6_S1_Contig148,IFM12_S16_Contig843
IFM050_S11_Contig3772	Cluster-34.0	0	0	0	0	1	NA	IFM050_S11_Contig3772
IFM050_S11_Contig2883	Cluster-35.0	0	0	0	0	1	NA	IFM050_S11_Contig2883
IFM050_S11_Contig3718	Cluster-36.0	0.25	-2.581	2.179	-1.185	0.236	NA	IFM050_S11_Contig3718
IFM050_S11_Contig3434	Cluster-37.0	0.391	-2.602	2.369	-1.099	0.272	NA	IFM050_S11_Contig3434
IFM12_S16_Contig841	Cluster-38.0	0.002	-0.674	2.396	-0.281	0.778	NA	IFM12_S16_Contig841
IFM050_S11_Contig3678	Cluster-39.0	0	0	0	0	1	NA	IFM050_S11_Contig3678
IFM050_S11_Contig3754	Cluster-40.0	0.221	-2.807	2.351	-1.194	0.232	NA	IFM050_S11_Contig3754
IFM050_S11_Contig3404,IFM050_S11_8222_soapGraphK61,IFM050_S11_Contig3398	Cluster-41.0	0	0	0	0	1	NA	IFM050_S11_Contig3404,IFM050_S11_8222_soapGraphK61,IFM050_S11_Contig3398
IFM050_S11_Contig3397	Cluster-42.0	0	0	0	0	1	NA	IFM050_S11_Contig3397
IFM050_S11_Contig3695	Cluster-43.0	0.372	-3.487	2.017	-1.729	0.0838	NA	IFM050_S11_Contig3695
SXC2_S4_L001_Contig1631	Cluster-43.1	0.008	-0.936	2.395	-0.391	0.696	NA	SXC2_S4_L001_Contig1631
IFM050_S11_7636_soapGraphK61	Cluster-44.0	0.029	-1.173	2.393	-0.49	0.624	NA	IFM050_S11_7636_soapGraphK61
IFM050_S11_Contig1086	Cluster-45.0	0	0	0	0	1	NA	IFM050_S11_Contig1086
IFM050_S11_Contig1995	Cluster-46.0	0	0	0	0	1	NA	IFM050_S11_Contig1995
IFM050_S11_8250_soapGraphK61,IFM050_S11_Contig3443	Cluster-47.0	0	0	0	0	1	NA	IFM050_S11_8250_soapGraphK61,IFM050_S11_Contig3443
IFM050_S11_Contig3670	Cluster-48.0	0	0	0	0	1	NA	IFM050_S11_Contig3670
IFM050_S11_Contig3707	Cluster-49.0	0.16	-2.203	2.377	-0.927	0.354	NA	IFM050_S11_Contig3707
IFM050_S11_Contig3710	Cluster-50.0	0	0	0	0	1	NA	IFM050_S11_Contig3710
IFM050_S11_Contig3737	Cluster-51.0	0	0	0	0	1	NA	IFM050_S11_Contig3737
IFM050_S11_Contig2915	Cluster-52.0	0	0	0	0	1	NA	IFM050_S11_Contig2915
IFM050_S11_Contig2855	Cluster-53.0	0	0	0	0	1	NA	IFM050_S11_Contig2855
IFM050_S11_Contig3680	Cluster-54.0	0	0	0	0	1	NA	IFM050_S11_Contig3680
IFM050_S11_7938_soapGraphK61	Cluster-55.0	0	0	0	0	1	NA	IFM050_S11_7938_soapGraphK61
IFM050_S11_Contig3659	Cluster-56.0	0.013	-1.063	2.394	-0.444	0.657	NA	IFM050_S11_Contig3659
IFM050_S11_Contig1106	Cluster-56.1	0.065	-0.544	2.385	-0.228	0.819	NA	IFM050_S11_Contig1106
IFM050_S11_Contig970	Cluster-57.0	0	0	0	0	1	NA	IFM050_S11_Contig970
IFM050_S11_8058_soapGraphK61,IFM050_S11_Contig3410	Cluster-58.0	0.179	-1.173	2.393	-0.49	0.624	NA	IFM050_S11_8058_soapGraphK61,IFM050_S11_Contig3410
IFM050_S11_Contig3665	Cluster-59.0	0	0	0	0	1	NA	IFM050_S11_Contig3665
IFM050_S11_Contig3755	Cluster-60.0	0	0	0	0	1	NA	IFM050_S11_Contig3755
IFM050_S11_Contig1469	Cluster-61.0	0	0	0	0	1	NA	IFM050_S11_Contig1469
IFM050_S11_Contig3382	Cluster-62.0	0	0	0	0	1	NA	IFM050_S11_Contig3382
IFM-049_S6_Contig33975	Cluster-63.0	0	0	0	0	1	NA	IFM-049_S6_Contig33975
IFM-049_S6_Contig32537	Cluster-64.0	0	0	0	0	1	NA	IFM-049_S6_Contig32537
IFM-049_S6_Contig17589	Cluster-65.0	0	0	0	0	1	NA	IFM-049_S6_Contig17589
IFM-049_S6_Contig27552	Cluster-66.0	0	0	0	0	1	NA	IFM-049_S6_Contig27552
IFM53_S14_L001_Contig2121	Cluster-67.0	0.104	-1.914	2.382	-0.803	0.422	NA	IFM53_S14_L001_Contig2121
IFM-049_S6_Contig16102	Cluster-68.0	0	0	0	0	1	NA	IFM-049_S6_Contig16102
IFM-049_S6_Contig15114	Cluster-69.0	0	0	0	0	1	NA	IFM-049_S6_Contig15114
IFM-049_S6_Contig31541	Cluster-70.0	0	0	0	0	1	NA	IFM-049_S6_Contig31541
IFM-049_S6_Contig31602	Cluster-71.0	0	0	0	0	1	NA	IFM-049_S6_Contig31602
IFM-049_S6_Contig31699	Cluster-71.1	0	0	0	0	1	NA	IFM-049_S6_Contig31699
IFM-049_S6_Contig40574	Cluster-72.0	0	0	0	0	1	NA	IFM-049_S6_Contig40574
IFM-049_S6_Contig37499	Cluster-73.0	0	0	0	0	1	NA	IFM-049_S6_Contig37499
IFM-049_S6_Contig14773	Cluster-74.0	0	0	0	0	1	NA	IFM-049_S6_Contig14773
SFC-21_S22_L002_Contig2147	Cluster-74.1	0.118	-1.126	2.376	-0.474	0.636	NA	SFC-21_S22_L002_Contig2147
IFM-049_S6_Contig38814	Cluster-75.0	0	0	0	0	1	NA	IFM-049_S6_Contig38814
IFM-049_S6_Contig40790	Cluster-76.0	0	0	0	0	1	NA	IFM-049_S6_Contig40790
IFM-049_S6_Contig14233	Cluster-77.0	0	0	0	0	1	NA	IFM-049_S6_Contig14233
IFM12_S16_Contig828	Cluster-78.0	0.134	-1.863	2.383	-0.782	0.434	NA	IFM12_S16_Contig828
IFM050_S11_Contig3702	Cluster-79.0	0.096	-2.185	2.377	-0.919	0.358	NA	IFM050_S11_Contig3702
IFM047_S10_Contig983	Cluster-81.0	0.359	-3.502	2.354	-1.488	0.137	NA	IFM047_S10_Contig983
IFM058_S13_Contig887	Cluster-82.0	0.075	-2.027	2.38	-0.851	0.394	NA	IFM058_S13_Contig887
IFM047_S10_Contig1214	Cluster-83.0	0.575	-4.087	2.254	-1.814	0.0697	NA	IFM047_S10_Contig1214
IFM058_S13_Contig1030	Cluster-84.0	0.164	-2.773	2.293	-1.209	0.227	NA	IFM058_S13_Contig1030
IFM050_S11_Contig3729	Cluster-85.0	0.383	-1.914	2.382	-0.803	0.422	NA	IFM050_S11_Contig3729
IFM050_S11_Contig3784	Cluster-86.0	0.39	-3.739	1.807	-2.069	0.0386	NA	IFM050_S11_Contig3784
IFM050_S11_Contig2122	Cluster-87.0	0.205	-1.617	2.387	-0.677	0.498	NA	IFM050_S11_Contig2122
IFM050_S11_Contig3423,IFM050_S11_8024_soapGraphK61	Cluster-88.0	0.191	-1.173	2.393	-0.49	0.624	NA	IFM050_S11_Contig3423,IFM050_S11_8024_soapGraphK61
IFM050_S11_7914_soapGraphK61,IFM050_S11_Contig2793	Cluster-89.0	0.191	-1.173	2.393	-0.49	0.624	NA	IFM050_S11_7914_soapGraphK61,IFM050_S11_Contig2793
IFD6_S1_Contig541	Cluster-90.0	0	0	0	0	1	NA	IFD6_S1_Contig541
IFM050_S11_Contig3749	Cluster-91.0	0	0	0	0	1	NA	IFM050_S11_Contig3749
IFC66_S31_L002_Contig1812	Cluster-91.1	0.081	0.226	2.372	0.095	0.924	NA	IFC66_S31_L002_Contig1812
IFM050_S11_Contig342	Cluster-92.0	0.275	-2.716	2.168	-1.253	0.21	NA	IFM050_S11_Contig342
IFD6_S1_Contig709	Cluster-93.0	0	0	0	0	1	NA	IFD6_S1_Contig709
IFM-049_S6_Contig33384,IFM050_S11_Contig3715	Cluster-94.0	0.314	-2.424	2.262	-1.072	0.284	NA	IFM-049_S6_Contig33384,IFM050_S11_Contig3715
IFD6_S1_Contig691	Cluster-95.0	0	0	0	0	1	NA	IFD6_S1_Contig691
IFD6_S1_4413_soapGraphK51,IFD6_S1_Contig716	Cluster-96.0	0	0	0	0	1	NA	IFD6_S1_4413_soapGraphK51,IFD6_S1_Contig716
IFM050_S11_Contig2900	Cluster-98.0	0.41	-2.656	2.239	-1.186	0.236	NA	IFM050_S11_Contig2900
IFC66_S31_L002_Contig1555,IFC66_S31_L002_5042_soapGraphK61	Cluster-99.0	0	0	0	0	1	NA	IFC66_S31_L002_Contig1555,IFC66_S31_L002_5042_soapGraphK61
IFC66_S31_L002_Contig1762	Cluster-100.0	0.052	-1.173	2.393	-0.49	0.624	NA	IFC66_S31_L002_Contig1762
IFC66_S31_L002_Contig1772	Cluster-101.0	0.074	-1.173	2.393	-0.49	0.624	NA	IFC66_S31_L002_Contig1772
IFC66_S31_L002_Contig1800	Cluster-102.0	0	0	0	0	1	NA	IFC66_S31_L002_Contig1800
IFC66_S31_L002_5070_soapGraphK61,IFC66_S31_L002_Contig1554	Cluster-103.0	0	0	0	0	1	NA	IFC66_S31_L002_5070_soapGraphK61,IFC66_S31_L002_Contig1554
IFC66_S31_L002_Contig1145	Cluster-104.0	0	0	0	0	1	NA	IFC66_S31_L002_Contig1145
IFC66_S31_L002_4840_soapGraphK61	Cluster-105.0	0	0	0	0	1	NA	IFC66_S31_L002_4840_soapGraphK61
IFC66_S31_L002_Contig1749	Cluster-106.0	0	0	0	0	1	NA	IFC66_S31_L002_Contig1749
IFC66_S31_L002_4996_soapGraphK61	Cluster-106.1	0	0	0	0	1	NA	IFC66_S31_L002_4996_soapGraphK61
IFC66_S31_L002_Contig1790	Cluster-107.0	0	0	0	0	1	NA	IFC66_S31_L002_Contig1790
IFC66_S31_L002_5158_soapGraphK61,IFC66_S31_L002_Contig1526	Cluster-108.0	0.02	-1.173	2.393	-0.49	0.624	NA	IFC66_S31_L002_5158_soapGraphK61,IFC66_S31_L002_Contig1526
IFC66_S31_L002_Contig1805	Cluster-109.0	0	0	0	0	1	NA	IFC66_S31_L002_Contig1805
IFC66_S31_L002_Contig1577	Cluster-110.0	0	0	0	0	1	NA	IFC66_S31_L002_Contig1577
IFC66_S31_L002_Contig1837	Cluster-111.0	0.207	-2.884	2.364	-1.22	0.223	NA	IFC66_S31_L002_Contig1837
IFC66_S31_L002_Contig1825	Cluster-112.0	0	0	0	0	1	NA	IFC66_S31_L002_Contig1825
IFC66_S31_L002_Contig1556	Cluster-113.0	0	0	0	0	1	NA	IFC66_S31_L002_Contig1556
IFC66_S31_L002_Contig1846	Cluster-114.0	0	0	0	0	1	NA	IFC66_S31_L002_Contig1846
IFC66_S31_L002_Contig1820	Cluster-115.0	0	0	0	0	1	NA	IFC66_S31_L002_Contig1820
SFC-18_S20_L002_Contig1453	Cluster-115.1	0.016	-1.118	2.393	-0.467	0.64	NA	SFC-18_S20_L002_Contig1453
IFC66_S31_L002_Contig1849	Cluster-116.0	0	0	0	0	1	NA	IFC66_S31_L002_Contig1849
IFC66_S31_L002_Contig1541	Cluster-117.0	0.039	-1.667	2.386	-0.698	0.485	NA	IFC66_S31_L002_Contig1541
IFC66_S31_L002_Contig1579,IFC66_S31_L002_5200_soapGraphK61	Cluster-118.0	0	0	0	0	1	NA	IFC66_S31_L002_Contig1579,IFC66_S31_L002_5200_soapGraphK61
IFC66_S31_L002_5180_soapGraphK61,IFC66_S31_L002_Contig1584	Cluster-119.0	0	0	0	0	1	NA	IFC66_S31_L002_5180_soapGraphK61,IFC66_S31_L002_Contig1584
IFC66_S31_L002_Contig1822	Cluster-120.0	0	0	0	0	1	NA	IFC66_S31_L002_Contig1822
IFC66_S31_L002_Contig1781	Cluster-121.0	0	0	0	0	1	NA	IFC66_S31_L002_Contig1781
IFC66_S31_L002_Contig1768	Cluster-122.0	0	0	0	0	1	NA	IFC66_S31_L002_Contig1768
IFM-049_S6_Contig32630,IFC66_S31_L002_Contig1840	Cluster-123.0	0	0	0	0	1	NA	IFM-049_S6_Contig32630,IFC66_S31_L002_Contig1840
IFC66_S31_L002_Contig1766	Cluster-124.0	0.041	-0.452	2.384	-0.19	0.85	NA	IFC66_S31_L002_Contig1766
SFU-3_S21_L002_Contig1445	Cluster-125.0	0	0	0	0	1	NA	SFU-3_S21_L002_Contig1445
SFU2_S5_L001_Contig1468	Cluster-126.0	0	0	0	0	1	NA	SFU2_S5_L001_Contig1468
SXC2_S4_L001_Contig1897	Cluster-128.0	0.173	2.102	2.353	0.893	0.372	NA	SXC2_S4_L001_Contig1897
IFD6_S1_Contig562	Cluster-129.0	0.025	0.043	2.391	0.018	0.986	NA	IFD6_S1_Contig562
SFM-8_S8_L001_Contig3536,IFM26_S8_Contig266	Cluster-131.0	0.647	0.567	2.095	0.271	0.786	NA	SFM-8_S8_L001_Contig3536,IFM26_S8_Contig266
SFM-8_S8_L001_Contig2444,SFM-8_S8_L001_Contig2461,SFC22_S9_L001_Contig2314	Cluster-132.0	0.359	-0.212	2.224	-0.095	0.924	NA	SFM-8_S8_L001_Contig2444,SFM-8_S8_L001_Contig2461,SFC22_S9_L001_Contig2314
SFM-8_S8_L001_Contig642	Cluster-133.0	0.089	-2.193	2.377	-0.923	0.356	NA	SFM-8_S8_L001_Contig642
SFM-8_S8_L001_Contig3003	Cluster-134.0	0	0	0	0	1	NA	SFM-8_S8_L001_Contig3003
SFM-8_S8_L001_Contig1532	Cluster-135.0	0	0	0	0	1	NA	SFM-8_S8_L001_Contig1532
SFM-8_S8_L001_Contig3523	Cluster-136.0	0	0	0	0	1	NA	SFM-8_S8_L001_Contig3523
IFM061_S15_Contig338	Cluster-137.0	0.433	0.379	2.094	0.181	0.856	NA	IFM061_S15_Contig338
SFM-8_S8_L001_Contig686	Cluster-137.1	0.06	-1.893	2.382	-0.795	0.427	NA	SFM-8_S8_L001_Contig686
SXC2_S4_L001_Contig1386	Cluster-137.2	0.464	-0.634	1.865	-0.34	0.734	NA	SXC2_S4_L001_Contig1386
SFM-8_S8_L001_Contig3525	Cluster-137.3	0.375	1.272	1.89	0.673	0.501	NA	SFM-8_S8_L001_Contig3525
SFM-8_S8_L001_Contig2970	Cluster-138.0	0	0	0	0	1	NA	SFM-8_S8_L001_Contig2970
SFM-7_S13_L001_5106_soapGraphK61	Cluster-139.0	0	0	0	0	1	NA	SFM-7_S13_L001_5106_soapGraphK61
IFC66_S31_L002_Contig980	Cluster-140.0	0.154	0.554	2.364	0.235	0.815	NA	IFC66_S31_L002_Contig980
SFM-7_S13_L001_Contig1084	Cluster-141.0	0	0	0	0	1	NA	SFM-7_S13_L001_Contig1084
SFM-7_S13_L001_Contig2137	Cluster-142.0	0.087	-2.131	2.378	-0.896	0.37	NA	SFM-7_S13_L001_Contig2137
SFM-7_S13_L001_Contig1049	Cluster-144.0	0.156	1.983	2.355	0.842	0.4	NA	SFM-7_S13_L001_Contig1049
SFM-6_S3_L001_Contig1993	Cluster-145.0	0	0	0	0	1	NA	SFM-6_S3_L001_Contig1993
SFM-6_S3_L001_Contig1999,IFM53_S14_L001_Contig2086	Cluster-146.0	0	0	0	0	1	NA	SFM-6_S3_L001_Contig1999,IFM53_S14_L001_Contig2086
SFM-6_S3_L001_Contig678	Cluster-147.0	0	0	0	0	1	NA	SFM-6_S3_L001_Contig678
IFM12_S16_Contig358	Cluster-148.0	0.184	2.152	2.352	0.915	0.36	NA	IFM12_S16_Contig358
SFM-6_S3_L001_Contig1264	Cluster-148.1	0	0	0	0	1	NA	SFM-6_S3_L001_Contig1264
SFM-6_S3_L001_Contig1994	Cluster-149.0	0.188	-2.824	2.365	-1.194	0.232	NA	SFM-6_S3_L001_Contig1994
IFM058_S13_Contig861	Cluster-150.0	0.244	-0.895	2.338	-0.383	0.702	NA	IFM058_S13_Contig861
IFM058_S13_Contig1103	Cluster-151.0	0.362	-1.482	2.326	-0.637	0.524	NA	IFM058_S13_Contig1103
IFM058_S13_Contig890	Cluster-152.0	0.04	0.043	2.391	0.018	0.986	NA	IFM058_S13_Contig890
IFM058_S13_Contig867	Cluster-153.0	0.04	0.043	2.391	0.018	0.986	NA	IFM058_S13_Contig867
IFM058_S13_Contig667	Cluster-154.0	0.297	1.306	2.329	0.561	0.575	NA	IFM058_S13_Contig667
IFM058_S13_Contig1100	Cluster-155.0	0.404	3.006	2.339	1.285	0.199	NA	IFM058_S13_Contig1100
SFM-8_S8_L001_Contig3560,IFM058_S13_Contig1095	Cluster-156.0	0.15	0.942	2.353	0.4	0.689	NA	SFM-8_S8_L001_Contig3560,IFM058_S13_Contig1095
SFM-1_S11_L001_Contig777	Cluster-157.0	0	0	0	0	1	NA	SFM-1_S11_L001_Contig777
SFM-1_S11_L001_Contig1572	Cluster-158.0	0	0	0	0	1	NA	SFM-1_S11_L001_Contig1572
SFM-1_S11_L001_Contig1234	Cluster-159.0	0	0	0	0	1	NA	SFM-1_S11_L001_Contig1234
SFM-1_S11_L001_Contig2068	Cluster-160.0	0.029	-1.173	2.393	-0.49	0.624	NA	SFM-1_S11_L001_Contig2068
SFM-1_S11_L001_Contig706	Cluster-161.0	0	0	0	0	1	NA	SFM-1_S11_L001_Contig706
SFM-1_S11_L001_Contig2079	Cluster-162.0	0	0	0	0	1	NA	SFM-1_S11_L001_Contig2079
SFM-1_S11_L001_Contig765,IFM047_S10_Contig1389	Cluster-163.0	0.632	-1.371	2.079	-0.66	0.51	NA	SFM-1_S11_L001_Contig765,IFM047_S10_Contig1389
SFM-1_S11_L001_Contig755	Cluster-164.0	0	0	0	0	1	NA	SFM-1_S11_L001_Contig755
SFM-1_S11_L001_Contig1882	Cluster-165.0	0	0	0	0	1	NA	SFM-1_S11_L001_Contig1882
SFM-1_S11_L001_Contig605	Cluster-166.0	0	0	0	0	1	NA	SFM-1_S11_L001_Contig605
SFM-1_S11_L001_Contig2059	Cluster-167.0	0.202	2.225	2.35	0.946	0.344	NA	SFM-1_S11_L001_Contig2059
SFM-1_S11_L001_Contig1190	Cluster-168.0	0	0	0	0	1	NA	SFM-1_S11_L001_Contig1190
SXC2_S4_L001_Contig1665	Cluster-170.0	0.328	2.77	2.342	1.183	0.237	NA	SXC2_S4_L001_Contig1665
IFM53_S14_L001_Contig1036	Cluster-171.0	0.331	-1.474	2.332	-0.632	0.527	NA	IFM53_S14_L001_Contig1036
IFM24_S5_Contig955	Cluster-172.0	0.26	-0.671	2.234	-0.3	0.764	NA	IFM24_S5_Contig955
SXC2_S4_L001_Contig1392	Cluster-173.0	0.041	0.043	2.391	0.018	0.986	NA	SXC2_S4_L001_Contig1392
SFM-7_S13_L001_Contig2136	Cluster-175.0	0.088	-0.99	2.378	-0.416	0.677	NA	SFM-7_S13_L001_Contig2136
SXC2_S4_L001_Contig1016	Cluster-176.0	0.082	0.803	2.381	0.337	0.736	NA	SXC2_S4_L001_Contig1016
SFM-10_S1_L001_Contig1018,SXC2_S4_L001_Contig919	Cluster-177.0	0.106	-1.173	2.393	-0.49	0.624	NA	SFM-10_S1_L001_Contig1018,SXC2_S4_L001_Contig919
SFM-10_S1_L001_Contig2445	Cluster-178.0	0.13	-1.46	2.362	-0.618	0.537	NA	SFM-10_S1_L001_Contig2445
SFM-10_S1_L001_Contig2525	Cluster-179.0	0.065	-1.921	2.382	-0.807	0.42	NA	SFM-10_S1_L001_Contig2525
SXC2_S4_L001_Contig561	Cluster-180.0	0.264	1.429	2.246	0.636	0.525	NA	SXC2_S4_L001_Contig561
SFM-10_S1_L001_Contig2570	Cluster-181.0	0	0	0	0	1	NA	SFM-10_S1_L001_Contig2570
IFC66_S31_L002_Contig1830	Cluster-183.0	0.024	0.413	2.387	0.173	0.863	NA	IFC66_S31_L002_Contig1830
SFC22_S9_L001_Contig2757	Cluster-184.0	0	0	0	0	1	NA	SFC22_S9_L001_Contig2757
SFC22_S9_L001_Contig2794	Cluster-185.0	0	0	0	0	1	NA	SFC22_S9_L001_Contig2794
SFC22_S9_L001_Contig3150	Cluster-186.0	0.264	-3.52	2.054	-1.714	0.0866	NA	SFC22_S9_L001_Contig3150
SFC22_S9_L001_Contig2799,SFC22_S9_L001_8592_soapGraphK61	Cluster-187.0	0.077	0.284	2.374	0.12	0.905	NA	SFC22_S9_L001_Contig2799,SFC22_S9_L001_8592_soapGraphK61
IFM57_S30_L002_Contig1006	Cluster-188.0	0.159	-1.676	2.357	-0.711	0.477	NA	IFM57_S30_L002_Contig1006
SFC22_S9_L001_Contig1690	Cluster-189.0	0.079	-2.09	2.379	-0.879	0.38	NA	SFC22_S9_L001_Contig1690
SFC22_S9_L001_Contig3146	Cluster-190.0	0.028	0.043	2.391	0.018	0.986	NA	SFC22_S9_L001_Contig3146
SFC22_S9_L001_Contig3163	Cluster-191.0	0.13	-0.047	2.354	-0.02	0.984	NA	SFC22_S9_L001_Contig3163
SFC22_S9_L001_Contig3053	Cluster-192.0	0	0	0	0	1	NA	SFC22_S9_L001_Contig3053
SFC22_S9_L001_Contig3130	Cluster-193.0	0	0	0	0	1	NA	SFC22_S9_L001_Contig3130
SFC22_S9_L001_Contig977	Cluster-194.0	0	0	0	0	1	NA	SFC22_S9_L001_Contig977
SFC22_S9_L001_Contig3189	Cluster-195.0	0	0	0	0	1	NA	SFC22_S9_L001_Contig3189
SFC22_S9_L001_Contig2807	Cluster-196.0	0.011	-0.017	2.392	-0.007	0.994	NA	SFC22_S9_L001_Contig2807
SFC22_S9_L001_Contig2330	Cluster-197.0	0	0	0	0	1	NA	SFC22_S9_L001_Contig2330
IFM27_S9_Contig304	Cluster-198.0	0.03	0.312	2.388	0.131	0.896	NA	IFM27_S9_Contig304
SFC22_S9_L001_Contig2364	Cluster-199.0	0	0	0	0	1	NA	SFC22_S9_L001_Contig2364
IFM058_S13_Contig194	Cluster-200.0	0.234	-0.225	2.127	-0.106	0.916	NA	IFM058_S13_Contig194
SFC22_S9_L001_Contig1709	Cluster-201.0	0.105	0.721	2.364	0.305	0.76	NA	SFC22_S9_L001_Contig1709
SFC22_S9_L001_Contig2394	Cluster-202.0	0.021	0.043	2.391	0.018	0.986	NA	SFC22_S9_L001_Contig2394
SFC22_S9_L001_Contig1580	Cluster-203.0	0.059	-1.863	2.383	-0.782	0.434	NA	SFC22_S9_L001_Contig1580
SFC-21_S22_L002_Contig2698	Cluster-204.0	0	0	0	0	1	NA	SFC-21_S22_L002_Contig2698
SFC-21_S22_L002_Contig2086	Cluster-205.0	0	0	0	0	1	NA	SFC-21_S22_L002_Contig2086
SFC-21_S22_L002_Contig2674	Cluster-206.0	0	0	0	0	1	NA	SFC-21_S22_L002_Contig2674
SFC-21_S22_L002_Contig1819	Cluster-207.0	0	0	0	0	1	NA	SFC-21_S22_L002_Contig1819
SFC-21_S22_L002_Contig2402	Cluster-208.0	0	0	0	0	1	NA	SFC-21_S22_L002_Contig2402
SFM-1_S11_L001_Contig1591	Cluster-209.0	0.054	0.803	2.381	0.337	0.736	NA	SFM-1_S11_L001_Contig1591
SFC-21_S22_L002_Contig2158	Cluster-209.1	0.055	1	2.378	0.421	0.674	NA	SFC-21_S22_L002_Contig2158
SFC-21_S22_L002_Contig2663	Cluster-210.0	0	0	0	0	1	NA	SFC-21_S22_L002_Contig2663
SFC-21_S22_L002_Contig2687	Cluster-211.0	0	0	0	0	1	NA	SFC-21_S22_L002_Contig2687
SFC-21_S22_L002_Contig2452	Cluster-212.0	0	0	0	0	1	NA	SFC-21_S22_L002_Contig2452
SFC-21_S22_L002_Contig1673	Cluster-213.0	0	0	0	0	1	NA	SFC-21_S22_L002_Contig1673
SFC-21_S22_L002_Contig2481	Cluster-214.0	0	0	0	0	1	NA	SFC-21_S22_L002_Contig2481
SFC-21_S22_L002_Contig2682	Cluster-215.0	0	0	0	0	1	NA	SFC-21_S22_L002_Contig2682
SFC-21_S22_L002_Contig2677	Cluster-216.0	0	0	0	0	1	NA	SFC-21_S22_L002_Contig2677
SFC-21_S22_L002_Contig2149	Cluster-217.0	0.202	2.225	2.35	0.946	0.344	NA	SFC-21_S22_L002_Contig2149
SFC-21_S22_L002_Contig1108	Cluster-218.0	0.028	0.043	2.391	0.018	0.986	NA	SFC-21_S22_L002_Contig1108
SFC-21_S22_L002_Contig1589	Cluster-219.0	0	0	0	0	1	NA	SFC-21_S22_L002_Contig1589
SFC-21_S22_L002_Contig2678	Cluster-220.0	0	0	0	0	1	NA	SFC-21_S22_L002_Contig2678
SFC-21_S22_L002_Contig2478	Cluster-221.0	0	0	0	0	1	NA	SFC-21_S22_L002_Contig2478
SFM-1_S11_L001_Contig1171	Cluster-222.0	0.054	0.803	2.381	0.337	0.736	NA	SFM-1_S11_L001_Contig1171
SFC-21_S22_L002_Contig2140	Cluster-222.1	0	0	0	0	1	NA	SFC-21_S22_L002_Contig2140
SFC19_S24_L002_Contig576	Cluster-223.0	0	0	0	0	1	NA	SFC19_S24_L002_Contig576
SFC19_S24_L002_Contig696,SFC19_S24_L002_26423_soapGraphK21	Cluster-224.0	0	0	0	0	1	NA	SFC19_S24_L002_Contig696,SFC19_S24_L002_26423_soapGraphK21
SFC-21_S22_L002_Contig1670,SFC19_S24_L002_Contig1552	Cluster-225.0	0.422	3.061	2.339	1.309	0.191	NA	SFC-21_S22_L002_Contig1670,SFC19_S24_L002_Contig1552
SFC19_S24_L002_Contig1561	Cluster-226.0	0	0	0	0	1	NA	SFC19_S24_L002_Contig1561
IFM-049_S6_Contig8766	Cluster-227.0	0.111	1.546	2.365	0.654	0.513	NA	IFM-049_S6_Contig8766
SFC19_S24_L002_Contig1387	Cluster-228.0	0	0	0	0	1	NA	SFC19_S24_L002_Contig1387
SFC19_S24_L002_Contig1160	Cluster-228.1	0	0	0	0	1	NA	SFC19_S24_L002_Contig1160
SFM-8_S8_L001_10350_soapGraphK61,SFM-8_S8_L001_Contig1588	Cluster-229.0	0.141	1.827	2.358	0.775	0.439	NA	SFM-8_S8_L001_10350_soapGraphK61,SFM-8_S8_L001_Contig1588
IFM26_S8_Contig218	Cluster-230.0	0.015	0.043	2.391	0.018	0.986	NA	IFM26_S8_Contig218
SFC-18_S20_L002_Contig422	Cluster-231.0	0	0	0	0	1	NA	SFC-18_S20_L002_Contig422
SFC-18_S20_L002_Contig1129	Cluster-232.0	0	0	0	0	1	NA	SFC-18_S20_L002_Contig1129
SFC-18_S20_L002_Contig1123	Cluster-233.0	0	0	0	0	1	NA	SFC-18_S20_L002_Contig1123
SFC-18_S20_L002_Contig1128	Cluster-234.0	0.408	3.038	2.339	1.299	0.194	NA	SFC-18_S20_L002_Contig1128
SFC17_S7_L001_Contig1948	Cluster-235.0	0	0	0	0	1	NA	SFC17_S7_L001_Contig1948
SFC17_S7_L001_Contig1424	Cluster-236.0	0.172	-2.767	2.366	-1.169	0.242	NA	SFC17_S7_L001_Contig1424
SFC17_S7_L001_Contig1747	Cluster-238.0	0.035	0.519	2.385	0.218	0.828	NA	SFC17_S7_L001_Contig1747
SFC17_S7_L001_Contig1395	Cluster-239.0	0.22	-1.833	2.384	-0.769	0.442	NA	SFC17_S7_L001_Contig1395
SFC17_S7_L001_Contig1951	Cluster-240.0	0	0	0	0	1	NA	SFC17_S7_L001_Contig1951
SFC17_S7_L001_Contig950	Cluster-241.0	0	0	0	0	1	NA	SFC17_S7_L001_Contig950
SFC17_S7_L001_Contig1371	Cluster-242.0	0	0	0	0	1	NA	SFC17_S7_L001_Contig1371
IFM27_S9_Contig508	Cluster-243.0	0.325	0.194	2.317	0.084	0.933	NA	IFM27_S9_Contig508
SFC17_S7_L001_Contig1933	Cluster-244.0	0.086	-2.124	2.378	-0.893	0.372	NA	SFC17_S7_L001_Contig1933
SFC22_S9_L001_Contig3221	Cluster-245.0	0.01	-0.037	2.392	-0.015	0.988	NA	SFC22_S9_L001_Contig3221
IFM061_S15_Contig329	Cluster-246.0	0.621	-1.493	1.66	-0.899	0.368	NA	IFM061_S15_Contig329
SFC17_S7_L001_Contig1932	Cluster-247.0	0	0	0	0	1	NA	SFC17_S7_L001_Contig1932
IFM27_S9_Contig412	Cluster-248.0	0.332	-2.484	1.972	-1.26	0.208	NA	IFM27_S9_Contig412
SFC17_S7_L001_Contig1709	Cluster-249.0	0.08	1.305	2.371	0.55	0.582	NA	SFC17_S7_L001_Contig1709
SFC17_S7_L001_Contig277	Cluster-250.0	0	0	0	0	1	NA	SFC17_S7_L001_Contig277
SFC17_S7_L001_Contig1966	Cluster-251.0	0.057	-1.796	2.384	-0.753	0.451	NA	SFC17_S7_L001_Contig1966
IFM050_S11_Contig2104	Cluster-252.0	0.028	-0.67	2.386	-0.281	0.779	NA	IFM050_S11_Contig2104
IFM047_S10_Contig1226	Cluster-254.0	0.137	-1.531	2.362	-0.648	0.517	NA	IFM047_S10_Contig1226
SFM-8_S8_L001_Contig2472,SFC22_S9_L001_Contig3185	Cluster-255.0	0.17	1.445	2.347	0.616	0.538	NA	SFM-8_S8_L001_Contig2472,SFC22_S9_L001_Contig3185
IFC66_S31_L002_Contig1571,IFC66_S31_L002_5172_soapGraphK61	Cluster-255.1	0.55	0.131	1.974	0.067	0.947	NA	IFC66_S31_L002_Contig1571,IFC66_S31_L002_5172_soapGraphK61
SFC17_S7_L001_Contig981	Cluster-256.0	0	0	0	0	1	NA	SFC17_S7_L001_Contig981
SFC16_S6_L001_Contig1372	Cluster-257.0	0.031	0.043	2.391	0.018	0.986	NA	SFC16_S6_L001_Contig1372
SFM-8_S8_L001_Contig3587	Cluster-258.0	0.007	-0.166	2.393	-0.069	0.945	NA	SFM-8_S8_L001_Contig3587
IFM21_S3_Contig310	Cluster-259.0	0.143	0.967	2.353	0.411	0.681	NA	IFM21_S3_Contig310
SFC22_S9_L001_8702_soapGraphK61,SFC22_S9_L001_Contig2802	Cluster-260.0	0.007	-0.166	2.393	-0.069	0.945	NA	SFC22_S9_L001_8702_soapGraphK61,SFC22_S9_L001_Contig2802
IFD6_S1_Contig558	Cluster-261.0	0.007	-0.166	2.393	-0.069	0.945	NA	IFD6_S1_Contig558
IFM21_S3_Contig354	Cluster-262.0	0.083	1.263	2.372	0.532	0.594	NA	IFM21_S3_Contig354
IFM058_S13_Contig845	Cluster-264.0	0.212	-2.476	2.357	-1.05	0.294	NA	IFM058_S13_Contig845
IFM058_S13_Contig999	Cluster-265.0	0.172	-2.206	2.362	-0.934	0.35	NA	IFM058_S13_Contig999
SFM-10_S1_L001_Contig2201	Cluster-266.0	0.418	1.282	2.316	0.553	0.58	NA	SFM-10_S1_L001_Contig2201
SFC15-CM_S29_L002_Contig1950	Cluster-268.0	0.103	1.58	2.364	0.668	0.504	NA	SFC15-CM_S29_L002_Contig1950
IFC66_S31_L002_Contig1563	Cluster-269.0	0.009	-0.084	2.392	-0.035	0.972	NA	IFC66_S31_L002_Contig1563
IFM57_S30_L002_Contig1717	Cluster-270.0	0.149	-0.182	2.328	-0.078	0.938	NA	IFM57_S30_L002_Contig1717
IFM57_S30_L002_Contig426	Cluster-270.1	0	0	0	0	1	NA	IFM57_S30_L002_Contig426
SFM-6_S3_L001_Contig1421	Cluster-271.0	0.375	2.412	2.191	1.101	0.271	NA	SFM-6_S3_L001_Contig1421
SFC15-CM_S29_L002_4685_soapGraphK61,SFC15-CM_S29_L002_Contig1719	Cluster-272.0	0	0	0	0	1	NA	SFC15-CM_S29_L002_4685_soapGraphK61,SFC15-CM_S29_L002_Contig1719
SFU-3_S21_L002_Contig1046	Cluster-273.0	0.249	2.497	2.346	1.064	0.287	NA	SFU-3_S21_L002_Contig1046
IFM050_S11_Contig3698	Cluster-274.0	0.307	-2.53	2.347	-1.078	0.281	NA	IFM050_S11_Contig3698
IFC66_S31_L002_Contig1810	Cluster-275.0	0.135	1.855	2.358	0.787	0.431	NA	IFC66_S31_L002_Contig1810
IFC66_S31_L002_Contig1794	Cluster-275.1	0.048	0.665	2.383	0.279	0.78	NA	IFC66_S31_L002_Contig1794
SFU-3_S21_L002_Contig1007	Cluster-275.2	0.126	-0.209	2.355	-0.089	0.929	NA	SFU-3_S21_L002_Contig1007
SFU-3_S21_L002_Contig944	Cluster-276.0	0.097	1.422	2.368	0.6	0.548	NA	SFU-3_S21_L002_Contig944
SFU-3_S21_L002_Contig1451	Cluster-277.0	0.032	0.043	2.391	0.018	0.986	NA	SFU-3_S21_L002_Contig1451
SFU-3_S21_L002_Contig1995	Cluster-278.0	0.109	-0.069	2.365	-0.029	0.977	NA	SFU-3_S21_L002_Contig1995
SFC14_S17_L001_Contig679,SFU-3_S21_L002_Contig1469	Cluster-279.0	0.648	3.538	2.335	1.515	0.13	NA	SFC14_S17_L001_Contig679,SFU-3_S21_L002_Contig1469
SFU-3_S21_L002_Contig1978,SFU-3_S21_L002_Contig1054,SFC14_S17_L001_Contig1217,SFC14_S17_L001_Contig1780	Cluster-280.0	0.324	2.773	2.342	1.184	0.236	NA	SFU-3_S21_L002_Contig1978,SFU-3_S21_L002_Contig1054,SFC14_S17_L001_Contig1217,SFC14_S17_L001_Contig1780
SFM-8_S8_L001_Contig3140	Cluster-281.0	0.278	2.599	2.344	1.109	0.268	NA	SFM-8_S8_L001_Contig3140
SFU-3_S21_L002_Contig1999	Cluster-282.0	0.065	0.803	2.381	0.337	0.736	NA	SFU-3_S21_L002_Contig1999
SFU-3_S21_L002_Contig1058	Cluster-283.0	0.162	2	2.355	0.849	0.396	NA	SFU-3_S21_L002_Contig1058
IFM24_S5_Contig498	Cluster-284.0	0.392	-1.593	1.857	-0.858	0.391	NA	IFM24_S5_Contig498
IFC66_S31_L002_Contig1795	Cluster-286.0	0.04	0.405	2.387	0.17	0.865	NA	IFC66_S31_L002_Contig1795
SFC17_S7_L001_Contig1219	Cluster-287.0	0.4	-2.685	2.345	-1.145	0.252	NA	SFC17_S7_L001_Contig1219
SFU-3_S21_L002_Contig1049	Cluster-288.0	0.097	1.422	2.368	0.6	0.548	NA	SFU-3_S21_L002_Contig1049
SFC14_S17_L001_Contig319	Cluster-289.0	0.047	0.898	2.38	0.377	0.706	NA	SFC14_S17_L001_Contig319
SFM-3_S12_L001_Contig1094,SFC13_S23_L002_Contig1547	Cluster-290.0	0.479	2.033	2.313	0.879	0.379	NA	SFM-3_S12_L001_Contig1094,SFC13_S23_L002_Contig1547
SFM-8_S8_L001_Contig2371	Cluster-292.0	0.096	-0.106	2.379	-0.044	0.965	NA	SFM-8_S8_L001_Contig2371
SFC22_S9_L001_Contig1467	Cluster-294.0	0.549	-0.408	1.869	-0.218	0.827	NA	SFC22_S9_L001_Contig1467
SFC13_S23_L002_Contig2450	Cluster-295.0	0.081	1.33	2.37	0.561	0.575	NA	SFC13_S23_L002_Contig2450
SFM-3_S12_L001_Contig1426	Cluster-297.0	0.467	3.244	2.281	1.422	0.155	NA	SFM-3_S12_L001_Contig1426
SFC13_S23_L002_Contig2467	Cluster-298.0	0.122	0.645	2.362	0.273	0.785	NA	SFC13_S23_L002_Contig2467
SFC13_S23_L002_Contig2458	Cluster-303.0	0.199	-0.53	2.338	-0.227	0.821	NA	SFC13_S23_L002_Contig2458
SFC13_S23_L002_Contig2112	Cluster-304.0	0.22	-1.238	2.342	-0.529	0.597	NA	SFC13_S23_L002_Contig2112
SFC13_S23_L002_24881_soapGraphK31	Cluster-305.0	0.016	0.043	2.391	0.018	0.986	NA	SFC13_S23_L002_24881_soapGraphK31
IFM050_S11_Contig3618	Cluster-306.0	0.197	1.221	2.346	0.52	0.603	NA	IFM050_S11_Contig3618
SFM-3_S12_L001_Contig1035	Cluster-309.0	0.088	0.803	2.381	0.337	0.736	NA	SFM-3_S12_L001_Contig1035
SFC13_S23_L002_Contig2142	Cluster-310.0	0.041	0.642	2.384	0.269	0.788	NA	SFC13_S23_L002_Contig2142
SFC13_S23_L002_Contig1465	Cluster-313.0	0.033	0.563	2.385	0.236	0.814	NA	SFC13_S23_L002_Contig1465
SFM-3_S12_L001_Contig1415,SFC13_S23_L002_Contig267	Cluster-315.1	0.373	-0.002	2.311	-0.001	0.999	NA	SFM-3_S12_L001_Contig1415,SFC13_S23_L002_Contig267
SFC13_S23_L002_Contig2708	Cluster-316.0	0.131	1.806	2.359	0.766	0.444	NA	SFC13_S23_L002_Contig2708
IFM26_S8_Contig604	Cluster-317.0	0.504	-0.872	2.209	-0.395	0.693	NA	IFM26_S8_Contig604
IFM26_S8_Contig450,IFM26_S8_Contig338,IFM058_S13_Contig955	Cluster-318.0	0.432	-1.133	2.313	-0.49	0.624	NA	IFM26_S8_Contig450,IFM26_S8_Contig338,IFM058_S13_Contig955
SFC14_S17_L001_Contig1204,SFU-3_S21_L002_Contig564	Cluster-319.0	0.291	2.656	2.344	1.133	0.257	NA	SFC14_S17_L001_Contig1204,SFU-3_S21_L002_Contig564
IFC66_S31_L002_Contig1315	Cluster-320.0	0.595	-1.075	1.858	-0.578	0.563	NA	IFC66_S31_L002_Contig1315
SFM-6_S3_L001_Contig1987	Cluster-321.0	0	0	0	0	1	NA	SFM-6_S3_L001_Contig1987
SFC-21_S22_L002_Contig1720	Cluster-323.0	0.335	-1.371	2.231	-0.614	0.539	NA	SFC-21_S22_L002_Contig1720
SFC13_S23_L002_Contig1805,SFC13_S23_L002_Contig2748	Cluster-324.0	0.081	1.33	2.37	0.561	0.575	NA	SFC13_S23_L002_Contig1805,SFC13_S23_L002_Contig2748
SFC-025_S33_L002_Contig1435	Cluster-326.0	0.319	0.219	2.318	0.094	0.925	NA	SFC-025_S33_L002_Contig1435
SFC22_S9_L001_Contig1655	Cluster-327.0	0.02	0.043	2.391	0.018	0.986	NA	SFC22_S9_L001_Contig1655
IFM24_S5_Contig911	Cluster-328.0	0.448	1.712	1.874	0.913	0.361	NA	IFM24_S5_Contig911
SFU2_S5_L001_Contig1089	Cluster-329.0	0.039	0.681	2.383	0.286	0.775	NA	SFU2_S5_L001_Contig1089
SFC-023_S32_L002_Contig534	Cluster-332.0	0	0	0	0	1	NA	SFC-023_S32_L002_Contig534
IFC66_S31_L002_Contig1310	Cluster-333.0	0.02	0.043	2.391	0.018	0.986	NA	IFC66_S31_L002_Contig1310
IFM050_S11_Contig3381	Cluster-334.0	0.059	1.01	2.378	0.425	0.671	NA	IFM050_S11_Contig3381
IFC66_S31_L002_Contig985	Cluster-335.0	0	0	0	0	1	NA	IFC66_S31_L002_Contig985
IFC66_S31_L002_Contig1557,IFC66_S31_L002_5182_soapGraphK61	Cluster-335.1	0.02	0.043	2.391	0.018	0.986	NA	IFC66_S31_L002_Contig1557,IFC66_S31_L002_5182_soapGraphK61
SFM-10_S1_L001_Contig2190	Cluster-338.0	0.477	0.972	2.31	0.421	0.674	NA	SFM-10_S1_L001_Contig2190
SFM-6_S3_L001_Contig2021	Cluster-339.0	0.142	-1.681	2.364	-0.711	0.477	NA	SFM-6_S3_L001_Contig2021

## Sheet: raw_corset_readcounts
SFC.023	SFC.025	SFC13	SFC14	SFC15.CM	SFC16	SFC17	SFC.18	SFC19	SFC.21	SFC22	SFD1.CM	SFM.10	SFM.1	SFM.3	SFM.5	SFM.6	SFM.7	SFM.8	SFM9	SFU2	SFU.3	SXC2	IFC63	IFC66	IFD6	IFD8	IFM047	IFM.049	IFM050	IFM054	IFM058	IFM060	IFM061	IFM12	IFM14	IFM21	IFM23	IFM24	IFM26	IFM27	IFM53	IFM56	IFM57
Cluster-0.0	0	0	0	0	0	0	0	0	0	0	0	0	0	0	0	0	0	0	0	0	0	0	0	0	0	0	0	0	0	0	0	0	0	0	0	0	0	0	0	0	0	0	0	80
Cluster-1.0	0	0	0	0	0	0	0	0	0	0	0	0	0	0	0	0	0	0	0	0	0	0	0	0	0	0	0	0	0	0	0	0	0	0	0	0	0	0	0	0	0	19	0	0
Cluster-2.0	0	0	0	0	0	0	0	0	0	0	0	0	0	0	0	0	0	0	0	0	0	0	0	0	0	0	0	0	0	0	0	0	0	0	0	0	0	0	0	0	0	59	0	0
Cluster-3.0	0	0	0	0	0	0	0	0	0	0	0	0	0	0	0	0	0	0	0	0	0	0	0	0	0	0	0	0	0	0	0	0	0	0	0	0	0	0	0	0	51	0	0	0
Cluster-4.0	0	0	0	0	0	0	0	0	0	0	0	0	0	0	0	0	0	0	0	0	0	0	0	0	0	0	0	0	0	0	0	0	0	0	0	0	0	0	0	0	22	0	0	0
Cluster-5.0	0	0	0	0	0	0	0	0	0	0	0	0	0	0	0	0	0	0	0	0	0	0	0	0	0	0	0	0	0	0	0	0	0	0	0	0	0	0	0	0	30	0	0	0
Cluster-6.0	0	0	0	0	0	0	0	0	0	0	0	0	0	0	0	0	0	0	0	0	0	0	0	0	0	0	0	0	0	0	0	0	0	0	0	0	0	0	0	0	188	0	0	0
Cluster-7.0	0	0	0	0	0	0	0	0	0	0	0	0	0	0	0	0	0	0	0	0	0	0	0	0	0	0	0	0	0	0	0	0	0	0	0	0	0	0	0	0	49	0	0	0
Cluster-8.0	0	0	0	0	0	0	0	0	0	0	0	0	0	0	0	0	0	0	0	0	0	0	0	0	0	0	0	0	0	0	0	0	0	0	0	0	0	0	0	0	165	0	0	0
Cluster-9.0	0	0	0	0	0	0	0	0	0	0	0	0	0	0	0	0	0	0	0	0	0	0	0	0	0	0	0	0	0	0	0	0	0	0	0	0	0	0	0	0	57	0	0	0
Cluster-10.0	0	0	0	0	0	0	0	0	0	0	0	0	0	0	0	0	0	1	0	0	0	0	0	0	0	0	0	0	0	0	0	0	0	0	0	0	0	0	0	0	0	0	0	14
Cluster-10.1	0	0	0	1	0	0	154	0	0	0	0	0	0	4776	1	0	0	1	0	0	1	0	0	0	0	2	2	1	1	50	3	3	3	0	3	0	1	1	0	0	1	3	0	0
Cluster-10.2	0	0	0	0	0	0	0	0	0	32	0	0	0	0	0	0	0	0	0	0	0	0	0	0	0	0	0	0	0	0	0	0	0	0	0	0	0	0	0	0	0	0	0	0
Cluster-10.3	1	0	83	0	0	0	13	0	27	6	0	0	9	15	17	0	1	0	0	0	13	0	0	58	0	0	0	0	0	0	1	0	1	59	0	15	4	0	25	0	89	0	0	0
Cluster-10.4	0	0	0	0	0	0	0	0	0	0	0	0	0	0	0	0	0	0	0	0	0	0	0	0	118	0	0	0	0	0	0	0	0	0	0	0	0	0	0	192	0	0	0	0
Cluster-10.5	0	16	36	22	102	53	201	502	48	0	54	0	217	86	10	34	68	901	25	0	82	156	10	83	70	63	64	97	97	1172	48	875	9	136	1187	14	54	7	69	142	27	31	0	11
Cluster-10.6	1	0	0	0	0	12	0	0	0	0	0	0	13	0	0	0	0	0	8	0	2	0	0	10	34	0	0	0	0	0	0	0	0	12	22	0	52	1	4	0	28	0	0	0
Cluster-10.7	0	0	0	0	0	0	0	0	0	0	0	0	0	0	0	0	0	0	0	0	0	0	28	0	0	0	0	0	0	0	0	0	0	0	0	0	0	0	0	0	0	0	0	0
Cluster-10.8	0	0	0	0	0	0	0	0	0	0	0	0	0	0	0	0	26	0	0	0	0	0	0	0	0	0	0	0	0	0	0	0	0	0	0	0	0	0	0	0	1	0	0	0
Cluster-10.9	0	5	35	4	0	0	0	16	0	0	0	0	0	0	23	0	0	0	0	0	1	0	0	0	13	0	0	0	0	0	0	0	0	0	0	0	0	0	0	26	0	0	0	0
Cluster-10.10	0	0	3	0	0	0	0	0	0	0	0	0	0	0	0	0	0	0	0	0	0	0	0	0	785	0	0	0	0	0	0	0	0	0	0	0	0	0	0	71	0	0	0	0
Cluster-10.11	1	0	0	0	0	0	0	0	0	0	0	0	0	0	0	0	0	0	0	0	0	0	0	0	0	0	0	0	0	0	0	0	0	0	0	0	0	0	0	0	0	0	0	149
Cluster-10.12	0	0	0	0	0	0	0	0	0	0	0	0	0	0	0	0	0	0	0	0	0	0	0	0	0	0	0	0	0	0	0	0	0	0	0	0	0	0	0	0	37	0	0	0
Cluster-10.13	0	0	0	0	0	0	0	0	0	0	0	0	0	0	0	0	0	0	0	0	0	0	0	0	0	0	0	0	0	0	0	0	0	0	0	0	0	42	0	0	0	0	251	0
Cluster-10.14	0	0	0	4	0	0	0	0	0	0	0	0	0	0	0	0	0	0	0	0	0	38	0	0	0	0	0	0	0	0	0	0	0	0	0	0	0	0	1	0	0	0	0	0
Cluster-10.15	0	0	0	0	0	0	0	0	0	0	0	0	0	0	0	0	0	0	0	0	0	0	0	0	0	0	0	0	0	0	0	0	0	0	0	0	0	47	0	0	0	0	8	0
Cluster-10.16	0	0	0	0	0	0	16	0	0	0	0	0	0	0	0	0	0	0	0	0	0	0	0	0	0	0	0	0	0	0	0	0	0	0	0	0	0	0	0	0	0	0	0	0
Cluster-10.17	0	0	0	8	0	1	18	1	1	0	5	0	1	1	2	0	0	10	5	0	2	5	0	1	9	1	2	20	1	173	6	2	0	2	67	0	15	1	0	0	11	0	0	1
Cluster-10.18	1	2	3	215	1	0	0	0	0	0	0	0	0	0	0	37	0	0	0	0	0	938	0	0	1896	0	2	0	0	0	0	1382	1	1	6	0	1	0	0	0	0	30	0	0
Cluster-10.19	0	0	0	0	0	0	0	0	0	87	0	0	0	0	0	0	0	0	0	0	0	0	0	0	0	0	0	0	0	0	0	0	0	0	0	0	0	0	2	0	0	0	0	0
Cluster-10.20	0	0	25	0	0	0	0	0	0	0	0	0	0	0	27	0	0	0	0	0	0	0	10	0	0	2	0	0	0	1	0	0	0	0	26	0	0	0	0	0	0	1	0	0
Cluster-10.21	0	0	314	0	0	0	0	0	0	0	0	0	0	0	9	0	0	0	0	0	0	0	0	0	0	0	0	0	6	0	0	0	0	0	0	0	0	0	0	0	1	0	0	0
Cluster-10.22	0	0	1	0	0	0	0	0	0	0	0	0	0	0	0	0	0	0	0	0	0	0	0	0	0	170	0	0	0	0	0	0	0	0	2050	0	0	0	0	0	0	0	0	0
Cluster-10.23	0	0	0	0	0	0	0	0	0	0	2	0	0	0	0	0	0	0	0	0	0	0	0	0	0	4	0	3	0	0	0	0	0	0	130	0	0	0	0	0	0	0	0	0
Cluster-10.24	0	0	0	0	0	0	0	0	0	18	0	0	0	0	0	0	0	0	0	0	0	0	0	0	0	0	0	0	0	0	0	0	0	0	0	0	0	0	1	0	0	0	0	0
Cluster-10.25	1	0	0	15	1	0	0	0	0	0	0	0	3	0	7	1	0	0	2	0	0	120	0	54	0	0	0	2	1	13	2	1	1	605	13	0	79	0	976	0	0	138	0	1
Cluster-10.26	1	1	0	0	0	0	0	556	0	0	0	0	0	0	0	0	0	0	0	0	0	0	0	0	0	0	0	0	0	0	0	0	0	0	2	0	1	0	0	0	0	0	0	1621
Cluster-10.27	0	0	0	0	0	0	0	0	348	0	0	0	0	0	0	0	0	0	0	0	0	0	0	0	0	0	0	0	0	0	0	0	0	0	0	0	0	0	0	0	0	0	0	0
Cluster-10.28	0	0	0	0	0	0	0	0	23	0	0	0	0	0	0	0	0	0	0	0	0	0	0	0	0	0	0	0	527	1	0	0	0	0	0	0	0	0	0	0	0	0	0	0
Cluster-10.29	0	0	0	133	0	0	0	0	0	0	0	0	0	0	0	0	0	0	0	0	0	233	0	0	0	0	0	0	0	0	0	0	0	0	0	0	1	0	0	0	0	0	0	0
Cluster-10.30	0	0	0	0	0	0	0	0	0	0	0	0	0	0	0	0	0	0	0	0	0	0	0	0	0	0	0	0	0	56	0	0	0	1	0	0	0	0	0	0	0	0	0	0
Cluster-10.31	0	0	0	0	0	0	0	0	0	0	0	0	0	0	0	0	0	0	0	0	0	0	0	0	0	2	0	0	0	40	0	0	0	0	0	0	0	0	0	0	0	0	0	0
Cluster-10.32	0	0	0	0	0	0	0	0	0	0	0	0	0	0	0	0	0	0	0	0	0	0	0	0	0	0	0	0	0	1540	0	0	0	0	0	1	0	0	0	0	0	0	0	0
Cluster-10.33	0	0	0	0	0	0	0	0	0	0	0	0	0	0	0	0	0	0	0	0	0	0	0	0	0	1	0	0	0	4879	0	1	0	0	0	2	0	0	0	0	3	0	0	0
Cluster-10.34	0	0	0	0	0	0	0	1	0	0	0	0	0	0	0	0	0	0	0	0	0	0	0	0	0	0	0	0	0	39	0	0	0	0	0	0	0	0	0	0	0	0	0	0
Cluster-10.35	0	0	0	0	0	0	0	0	0	0	0	0	0	0	0	0	0	0	0	0	0	0	0	0	0	0	0	0	0	217	0	0	0	0	0	0	0	0	0	0	0	0	0	0
Cluster-10.36	0	0	0	0	0	0	0	0	0	0	0	0	0	0	0	0	0	0	0	0	0	0	0	0	0	0	0	0	0	0	0	0	0	0	0	0	0	0	0	0	424	0	0	0
Cluster-10.37	0	0	0	0	0	0	0	0	0	0	0	0	0	0	0	0	0	0	0	0	0	0	0	0	0	0	0	0	0	784	0	0	0	0	0	0	0	0	0	0	0	0	0	0
Cluster-10.38	0	0	0	0	0	0	46	0	0	0	0	0	0	0	0	0	0	0	0	0	0	0	0	0	0	0	0	0	0	0	0	0	0	0	0	0	0	0	0	0	0	0	0	0
Cluster-10.39	0	0	0	0	0	0	5	0	0	0	0	0	0	0	0	0	0	0	0	0	0	0	0	0	0	0	0	0	0	0	0	0	0	0	4	0	0	0	0	0	0	0	0	0
Cluster-10.40	0	0	0	0	0	0	0	0	0	0	334	0	0	0	0	0	0	0	0	0	0	0	0	0	0	0	0	0	0	2	0	0	0	0	0	0	0	0	0	0	0	0	0	48
Cluster-10.41	0	0	0	0	0	0	0	0	0	1	3	0	0	0	2	0	0	0	5	0	0	0	0	0	2	0	0	2	0	0	6	1	2	0	0	0	0	2	0	0	14	0	1	0
Cluster-10.42	0	0	0	0	0	0	0	0	0	0	0	0	0	0	0	0	0	0	0	0	0	0	0	0	0	1	0	0	0	3025	2	0	0	0	2	0	0	0	0	0	1	0	0	0
Cluster-10.43	0	0	0	0	0	0	0	0	0	0	0	0	0	0	0	0	0	0	0	0	0	0	0	0	0	0	0	0	1	3997	0	0	0	0	3	2	0	1	0	0	0	0	0	0
Cluster-10.44	0	0	0	0	0	0	0	0	0	0	0	0	0	0	0	0	0	0	0	0	0	0	0	0	0	1	1	1	0	11005	1	0	0	0	0	1	0	0	0	0	2	0	0	0
Cluster-10.45	0	0	0	3	0	0	0	0	0	0	1	0	0	0	0	0	0	0	1845	0	0	35	0	0	0	0	0	3	0	0	14	0	0	0	0	0	0	0	0	0	0	0	0	0
Cluster-10.46	0	0	0	0	0	0	0	0	0	0	0	0	0	0	0	0	0	0	0	0	0	0	0	0	0	2	0	1	3	9883	2	0	0	0	0	1	1	0	0	2	1	0	0	0
Cluster-10.47	0	0	0	0	0	0	0	0	0	0	0	0	0	0	0	0	0	0	0	0	0	0	0	0	0	3	0	2	1	10144	0	0	1	1	1	1	0	1	1	2	2	0	0	0
Cluster-10.48	0	0	0	0	0	0	0	0	0	0	0	0	0	0	0	0	0	0	0	0	0	0	0	0	0	0	0	0	1	3441	0	0	0	0	1	0	0	0	1	0	0	0	0	0
Cluster-10.49	0	0	0	0	0	0	0	0	0	1	0	0	0	0	0	0	0	0	0	0	0	0	0	0	0	0	0	0	0	3353	0	0	0	0	0	0	0	0	0	0	0	0	0	0
Cluster-10.50	0	0	0	0	0	0	0	0	0	32	0	0	0	0	0	0	0	0	0	0	0	0	0	0	0	0	0	0	0	2	0	0	0	0	0	0	0	0	0	0	0	0	0	0
Cluster-10.51	0	0	0	0	0	0	0	0	0	0	0	0	0	0	0	0	0	0	0	0	0	0	0	0	0	1	1	0	1	4912	0	1	0	0	0	0	1	0	0	0	0	0	0	0
Cluster-10.52	0	0	0	0	0	0	0	0	0	0	0	0	0	0	0	0	0	0	0	0	0	0	0	0	0	1	0	0	0	1605	0	1	0	0	0	0	0	0	1	0	0	0	0	0
Cluster-10.53	0	0	0	0	0	0	76	0	0	0	0	0	0	0	1	0	0	0	0	0	0	0	0	0	0	0	0	0	0	0	0	0	0	0	0	0	0	0	0	2	0	0	0	0
Cluster-10.54	0	0	0	14	0	0	0	0	0	0	0	0	0	0	0	0	0	0	0	0	0	11	0	0	0	0	0	0	0	0	0	0	0	0	130	0	0	0	0	0	0	0	0	0
Cluster-10.55	0	0	0	0	0	0	0	0	0	0	0	0	0	0	0	0	0	0	0	0	0	0	0	0	0	0	0	0	0	1651	0	0	0	0	0	0	0	0	0	1	0	0	0	0
Cluster-10.56	0	0	0	0	0	1	6	0	0	0	3934	0	0	0	0	0	0	17	8	0	0	0	0	0	724	0	0	0	100	11	0	0	0	0	0	0	0	3	0	0	2	0	0	558
Cluster-10.57	0	0	0	0	0	0	0	0	0	0	0	0	0	0	0	0	0	0	0	0	0	0	0	0	0	1	0	0	0	1111	0	0	0	0	0	0	0	0	0	0	0	0	0	0
Cluster-10.58	0	0	0	70	0	0	79	0	0	0	0	0	0	0	0	0	0	0	0	0	0	164	0	0	4	0	1	0	0	0	0	0	0	2	13	0	0	0	0	0	0	0	0	0
Cluster-10.59	0	0	0	0	0	2	0	0	0	0	0	0	0	0	0	0	0	0	0	0	0	0	0	0	0	20	0	0	0	2	0	0	0	0	60	0	0	0	0	0	0	0	0	0
Cluster-10.60	0	1	0	13	2	0	0	0	64	0	0	0	0	0	0	0	0	1	0	0	0	2	13	4	0	0	0	0	0	1	0	0	0	2	0	0	1	0	1	95	11	2	0	0
Cluster-10.61	0	0	0	0	0	0	0	0	0	0	0	0	0	0	0	0	0	0	0	0	0	0	0	0	121	0	0	0	0	7	0	0	0	0	0	0	0	0	0	0	0	0	0	0
Cluster-10.62	0	0	0	0	0	0	0	0	0	0	0	0	0	0	0	0	0	0	0	0	0	0	0	0	0	0	0	0	0	943	0	0	0	0	0	0	0	0	0	0	0	0	0	0
Cluster-10.63	0	0	0	0	0	0	0	0	0	0	0	0	0	0	0	0	0	0	0	0	0	0	0	0	0	1	0	1	2	4837	0	0	0	0	1	0	0	1	0	0	0	0	0	0
Cluster-10.64	0	0	0	0	0	0	0	0	0	0	0	0	0	0	0	0	0	0	0	0	0	0	0	0	0	0	0	0	1	909	0	0	0	0	1	0	0	0	0	0	0	0	0	0
Cluster-10.65	0	0	0	0	0	0	0	0	0	0	0	0	0	0	0	0	0	0	0	0	0	0	0	0	0	0	0	0	0	404	0	0	0	0	0	0	0	0	0	0	0	0	0	0
Cluster-10.66	2	0	0	0	0	0	0	0	0	0	0	0	0	0	0	0	0	0	0	0	0	0	0	0	0	0	0	0	0	7	0	0	0	0	0	0	0	0	0	0	0	0	0	124
Cluster-10.67	0	0	1	0	0	0	0	0	0	0	0	0	0	0	0	0	0	0	0	0	0	0	0	0	1	0	0	2	1	9247	1	0	1	1	0	0	1	0	2	0	3	0	0	0
Cluster-10.68	0	0	23	0	0	0	0	0	0	0	0	0	0	0	5	0	0	0	0	0	0	0	0	0	0	0	0	0	0	49	0	0	0	6	0	0	0	0	0	0	0	0	0	0
Cluster-10.69	0	0	0	0	0	0	0	0	0	0	0	0	0	0	0	0	0	0	0	0	0	0	0	0	97	0	0	0	0	31	0	0	0	0	0	0	0	0	0	0	0	0	0	0
Cluster-10.70	0	0	0	0	0	0	0	0	0	0	0	0	0	0	0	0	0	0	0	0	0	0	0	0	0	4	2	3	5	31758	1	1	1	0	4	2	5	0	3	4	2	0	0	0
Cluster-10.71	0	0	0	0	0	0	0	0	0	0	0	0	0	0	0	0	0	0	0	0	0	0	0	0	0	4	5	2	1	27763	2	0	1	1	1	0	2	4	3	1	2	0	0	0
Cluster-10.72	0	0	0	0	0	0	0	0	0	0	0	0	0	0	0	0	0	0	0	0	0	0	0	0	0	0	0	0	0	0	0	0	0	0	6	0	0	0	0	106	0	0	0	0
Cluster-10.73	0	0	0	1	0	0	0	0	0	0	0	0	0	6	0	0	0	0	0	0	0	109	0	0	0	0	3	38	0	0	127	0	0	0	1	0	0	0	0	0	0	0	0	0
Cluster-10.74	0	0	0	0	0	3	0	0	0	0	0	0	0	0	0	0	1	0	0	0	0	0	0	0	0	89	3	3	3	26765	0	1	0	1	2	3	2	1	5	7	0	0	0	0
Cluster-10.75	0	0	0	0	0	0	0	0	0	0	0	0	0	0	0	0	43	0	0	0	0	0	0	0	0	0	0	0	0	0	0	0	0	0	0	0	0	0	0	0	0	0	0	0
Cluster-10.76	0	2	256	2	0	0	0	0	0	0	583	1	0	0	213	0	0	0	0	0	0	0	13	0	0	0	0	0	0	2	0	28	0	0	0	0	0	0	0	0	0	0	0	186
Cluster-10.77	0	0	0	0	0	0	0	0	0	0	0	0	0	0	0	0	0	0	0	0	0	0	0	0	0	0	0	0	0	2828	1	0	0	0	0	0	0	1	0	0	0	0	0	0
Cluster-10.78	0	0	0	0	0	0	0	0	0	0	0	0	0	0	0	0	0	0	0	0	0	0	0	0	0	0	0	0	0	8883	0	0	0	0	1	0	0	0	0	0	1	0	0	0
Cluster-10.79	0	0	0	0	0	0	0	0	0	0	0	0	0	0	0	0	0	0	0	0	0	0	0	0	0	0	0	0	0	2617	0	1	0	0	0	0	0	0	0	0	0	0	0	0
Cluster-10.80	0	0	0	0	0	0	0	0	0	0	0	0	0	0	0	0	0	0	0	0	0	0	0	0	0	0	0	0	6	518	0	1	0	0	0	0	0	4	1	0	1	0	1	0
Cluster-10.81	1	0	0	0	0	0	1	0	0	0	0	0	0	0	0	0	0	0	0	0	1	0	0	0	0	0	0	0	1	0	0	0	0	14	6	0	0	0	0	0	0	0	0	0
Cluster-10.82	0	0	0	0	0	0	0	0	0	0	0	0	0	0	0	0	0	0	0	0	0	0	0	0	0	0	0	0	1	0	0	0	0	0	0	0	0	0	0	6	0	15	0	0
Cluster-10.83	0	2	0	3	0	19	1	0	1970	0	0	0	0	0	0	0	0	0	0	0	2	2	0	2	1	2	0	0	31	5	0	0	0	5	0	0	2	25	2	41	7	8	0	1
Cluster-10.84	0	0	0	0	0	0	0	0	5	0	0	0	26	0	0	0	0	1	0	0	0	0	0	0	0	0	0	0	272	0	0	0	0	0	0	0	14	0	0	0	0	0	0	0
Cluster-10.85	0	0	0	0	0	0	0	0	0	0	0	0	0	0	0	0	0	0	0	0	0	0	0	0	0	0	0	0	142	0	0	0	0	0	0	0	0	0	0	0	0	0	0	0
Cluster-10.86	0	0	0	0	0	0	0	0	0	0	0	0	0	0	0	0	0	0	0	0	0	0	0	0	0	0	0	0	154	0	0	0	0	0	0	0	0	0	0	0	0	0	0	0
Cluster-10.87	0	0	0	0	0	0	0	0	0	0	0	0	0	0	0	0	0	0	0	0	0	0	0	0	0	0	0	0	42	0	0	0	0	0	0	0	0	0	0	0	0	0	0	0
Cluster-10.88	0	0	0	0	0	0	5	0	0	0	0	0	0	0	0	0	0	0	0	0	0	0	0	0	0	0	6	43	0	0	0	0	0	0	0	0	0	0	0	0	7	1	0	0
Cluster-10.89	0	0	0	0	0	0	0	0	0	0	0	0	0	0	0	0	0	0	0	0	0	0	0	0	0	1	0	0	455	16144	1	0	0	0	2	2	0	1	1	1	1	0	0	0
Cluster-10.90	0	0	0	0	0	3	0	0	0	0	0	0	0	0	0	0	0	0	0	0	2	0	0	0	0	1	0	4	80	0	5	0	0	0	0	0	4	0	0	0	0	0	0	0
Cluster-10.91	0	0	0	0	0	0	0	0	0	0	0	0	0	0	0	0	0	0	0	0	0	0	0	0	0	0	0	0	113	0	0	0	0	0	0	0	0	0	0	0	0	0	0	0
Cluster-10.92	0	0	3	0	0	0	0	0	1	0	3	0	0	2	0	0	0	0	0	0	0	0	0	0	0	296	0	3	0	142	0	0	0	0	0	0	0	0	0	0	0	2	0	0
Cluster-10.93	0	0	0	0	0	0	0	0	0	0	0	0	0	0	0	0	0	0	0	0	0	0	0	0	349	0	0	0	0	0	0	0	0	0	0	0	0	25	0	0	0	0	7	0
Cluster-10.94	0	0	0	3	0	0	0	0	0	0	0	0	0	0	0	0	0	0	0	0	0	1	0	0	0	4	0	0	0	212	0	0	0	0	0	0	0	0	0	0	0	0	0	0
Cluster-10.95	0	4	3793	0	6	0	0	0	180	1	0	0	5	0	1652	0	2	0	0	0	0	0	253	0	0	0	1	50	0	1	7	1	0	0	0	0	0	114	0	4	0	17	0	0
Cluster-10.96	0	0	0	0	0	0	0	0	0	0	0	0	0	0	0	0	0	0	0	0	0	0	0	0	0	0	0	1	0	0	0	0	0	0	0	0	0	136	0	0	0	0	0	0
Cluster-10.97	0	0	1	0	23	100	8	0	4	0	7	0	2	26	0	0	2	0	13	0	0	4	0	5	0	8	22	29	87	232	10	2	0	3	44	0	14	88	10	3	8	13	0	1
Cluster-10.98	1370	0	0	0	0	73	0	14	0	0	263	0	0	0	0	0	12	0	0	0	0	0	0	0	0	0	0	0	0	0	0	16	0	0	0	3	0	2	0	4	139	1	0	21
Cluster-10.99	0	0	0	0	0	0	0	0	0	0	0	0	0	0	0	0	0	0	0	0	0	0	0	0	0	8	1	0	0	146	0	0	0	0	0	0	0	0	0	1	0	0	0	0
Cluster-10.100	0	0	0	1	0	42	1	0	0	3	1896	0	1	0	0	0	0	0	332	0	0	0	0	1	82	16	0	0	3	0	0	0	0	0	0	0	0	1	0	0	2	0	0	0
Cluster-10.101	0	2	0	0	0	0	2	0	492	0	0	0	0	0	0	0	0	25	0	0	0	0	0	0	0	0	6	4	33	0	5	0	0	0	0	19	0	0	0	0	0	0	0	1
Cluster-10.102	0	1	0	7	0	0	0	0	0	0	0	0	0	0	0	0	0	0	0	0	0	83	0	0	0	0	0	0	0	0	0	0	0	0	0	0	0	0	0	0	0	0	0	0
Cluster-10.103	1	0	0	0	0	0	0	0	0	0	0	0	0	0	0	0	0	0	0	0	16	0	0	0	0	0	11	87	0	0	121	0	0	0	0	0	0	0	0	0	11	0	0	0
Cluster-10.104	0	0	0	0	0	0	0	0	0	0	0	0	0	0	0	0	0	0	0	0	0	0	0	0	0	0	0	0	0	2527	0	0	0	1	0	1	0	0	0	1	0	0	0	0
Cluster-10.105	0	0	0	0	0	0	0	0	0	0	0	0	0	0	0	0	20	0	0	0	0	0	0	0	0	0	0	0	1	0	0	0	0	0	7	0	0	0	0	0	0	0	0	0
Cluster-10.106	0	0	0	0	0	0	0	0	0	1	0	0	0	0	0	0	0	0	0	0	32	0	0	0	0	0	29	169	0	0	275	0	0	0	0	0	0	0	0	0	8	0	0	0
Cluster-10.107	3	0	0	0	0	0	0	0	0	0	0	0	0	0	0	0	0	0	0	0	21	0	0	0	0	1	14	132	0	0	169	0	0	0	0	0	0	0	0	0	13	0	0	0
Cluster-10.108	0	0	0	0	0	0	0	3	0	0	0	0	0	363	0	1	0	0	0	0	0	0	38	0	0	0	1	0	192	0	0	83	0	0	0	58	0	5	0	10	3	0	0	0
Cluster-10.109	0	0	0	0	0	0	0	0	0	0	0	0	0	0	0	0	0	0	0	0	0	0	0	0	0	1	1	2	0	7028	0	0	0	1	0	0	0	0	0	1	1	0	0	0
Cluster-10.110	0	0	0	0	0	0	0	0	0	0	0	0	0	0	0	0	0	0	36	0	0	0	0	0	0	0	0	0	0	0	0	0	0	0	0	0	0	0	0	0	0	0	0	1
Cluster-10.111	0	0	0	0	0	0	0	0	0	0	0	0	0	0	0	0	0	0	0	0	0	0	0	0	0	0	0	2	2	0	1	0	0	0	9	0	0	0	0	0	0	0	0	533
Cluster-10.112	0	0	0	0	0	0	0	0	0	0	0	0	0	0	0	0	0	0	0	0	0	0	0	0	0	0	0	0	23	0	0	0	0	0	0	0	0	0	0	0	0	0	0	0
Cluster-10.113	0	0	0	6	0	0	0	0	0	0	0	0	0	0	0	0	0	0	0	0	0	11	0	0	0	0	0	0	0	0	0	3	0	0	0	0	0	0	0	0	0	0	0	0
Cluster-10.114	0	0	0	0	0	0	0	0	0	0	0	0	0	0	0	0	15	0	0	0	0	0	0	0	0	0	0	0	0	0	0	0	0	0	0	0	0	0	0	0	0	0	0	0
Cluster-10.115	0	0	0	0	0	1	0	0	0	0	164	0	0	0	0	0	0	0	0	0	0	0	0	0	0	0	0	0	0	0	0	0	0	0	0	0	0	0	0	0	0	0	0	0
Cluster-10.116	0	0	0	0	0	0	0	0	0	0	0	0	0	0	0	0	0	0	0	0	0	0	0	0	0	0	7	1	0	0	0	0	0	0	20	0	0	0	0	0	0	0	0	4
Cluster-10.117	0	0	0	0	0	0	0	0	0	0	0	0	0	0	0	0	0	0	0	0	0	0	0	0	0	27	0	0	0	0	0	0	0	0	0	0	0	0	0	0	0	0	0	0
Cluster-10.118	0	0	0	0	0	0	0	0	0	0	0	0	0	0	0	0	0	0	26	0	0	0	0	0	0	0	0	0	0	0	0	3	0	1	0	0	0	0	0	0	0	0	0	2
Cluster-10.119	0	0	0	0	170	0	0	0	0	0	0	0	1	0	0	0	0	907	0	0	0	0	0	7	3	0	0	0	0	0	0	0	0	2	0	0	1	0	2	0	0	0	0	0
Cluster-10.120	0	0	9	0	1	0	5	2	0	337	0	0	0	3	3	7	1	10	0	0	1	0	0	4	3	0	3	4	2	6	1	21	0	2	0	0	2	0	3	22	2	2	0	0
Cluster-10.121	0	0	0	0	0	0	0	0	0	0	0	0	0	0	0	0	0	0	0	0	0	0	0	0	0	0	2	4	0	52	0	0	1	1	0	0	0	17	2	1	0	0	0	0
Cluster-10.122	0	3	0	0	0	0	0	0	0	0	0	0	0	0	0	2	0	0	0	0	0	0	3	0	0	0	26	202	126	0	3	40	0	0	1	15	0	1	0	0	0	0	0	0
Cluster-10.123	0	0	0	0	0	0	136	0	0	0	0	0	0	0	0	0	0	0	0	0	0	0	0	0	0	0	0	0	0	0	0	1	4	0	0	0	0	0	0	0	0	0	0	0
Cluster-10.124	0	0	0	0	0	0	0	0	0	0	0	0	0	0	0	0	0	0	0	0	0	0	0	0	0	0	0	3	0	0	0	0	0	0	0	1	0	16	0	0	0	0	0	0
Cluster-10.125	0	0	0	0	0	0	0	0	14	0	0	0	0	0	0	0	0	0	0	0	0	0	0	0	0	0	0	0	0	0	0	5	0	0	0	0	0	0	0	0	0	0	0	0
Cluster-10.126	0	1	0	2	0	0	0	0	0	0	0	0	0	1	0	0	0	0	0	0	0	21	0	0	0	0	0	9	0	0	0	0	0	0	0	0	0	0	0	0	2	0	0	0
Cluster-10.127	0	0	0	106	0	0	0	0	0	0	0	0	0	0	0	0	0	0	0	0	0	107	0	0	0	0	0	0	0	0	0	0	0	0	0	0	0	0	0	0	0	0	0	0
Cluster-10.128	0	1	91	2	4	0	0	0	1	0	0	0	1	30	17	0	0	2	0	0	13	3	5	0	0	0	0	0	27	5	0	2	0	0	4	2	32	1	0	0	6	0	0	0
Cluster-10.129	0	0	0	0	0	0	0	0	0	0	0	0	0	0	0	0	0	0	0	0	0	0	0	0	0	0	0	0	20	0	0	0	0	0	0	0	0	0	0	0	0	0	0	0
Cluster-10.130	0	0	0	0	0	0	0	15	0	0	0	0	0	0	0	0	0	0	0	0	0	0	0	0	0	0	0	0	0	0	0	0	0	0	0	0	0	0	0	0	0	0	0	0
Cluster-10.131	0	0	0	0	0	0	0	0	0	14	0	0	0	0	0	0	0	0	0	0	0	0	0	0	0	0	0	0	0	0	0	0	0	0	0	0	0	0	0	0	0	0	0	0
Cluster-10.132	0	0	0	0	0	0	0	0	0	0	1507	0	0	0	0	0	0	0	0	0	0	0	0	0	0	0	0	0	0	0	0	0	0	0	0	0	0	0	0	0	0	0	0	0
Cluster-10.133	0	0	0	0	0	0	0	0	0	0	0	0	0	0	0	0	0	0	0	0	0	0	0	0	0	0	5	10	0	0	42	0	0	0	0	0	0	0	0	0	6	0	0	0
Cluster-10.134	0	0	0	0	0	0	0	0	0	44	0	0	0	0	0	0	0	0	0	0	0	0	0	0	0	0	0	0	0	0	0	0	0	0	0	0	0	0	0	0	0	0	0	0
Cluster-10.135	0	0	0	2	0	0	0	0	0	0	0	0	0	0	0	0	0	0	0	0	0	11	0	0	0	0	0	0	0	0	0	0	0	0	0	0	0	0	0	0	0	0	0	0
Cluster-10.136	2	0	1	0	0	0	0	0	0	9	0	0	0	0	0	0	8	0	0	0	2	0	0	0	0	0	1	5	13	2	2	0	0	0	0	0	0	0	0	0	0	0	0	0
Cluster-10.137	0	0	7	0	0	4	0	0	6	0	0	0	0	0	2	0	0	0	0	0	0	0	0	0	0	0	0	7	0	0	8	0	0	0	0	0	0	0	0	0	0	0	0	0
Cluster-10.138	0	1	450	0	16	0	0	0	59	0	185	0	3	0	201	0	0	0	0	0	27	0	193	13	0	31	10	0	27	0	3	0	0	59	0	1	1	0	33	0	0	0	0	4
Cluster-10.139	0	0	0	0	0	3	0	0	0	3	0	0	0	0	0	0	0	0	0	0	0	0	0	0	0	4	0	0	2	33	0	0	0	0	15	6	0	0	0	0	2	0	0	0
Cluster-10.140	0	0	0	0	0	0	0	0	0	0	0	0	0	0	0	0	0	0	0	0	0	2	0	0	0	1	1	0	0	7661	0	0	0	0	1	16	0	0	0	0	0	0	0	0
Cluster-10.141	0	0	0	0	0	9	0	0	0	14	0	0	0	0	0	0	0	0	0	0	0	0	0	0	0	15	0	0	2	0	0	0	0	0	36	0	0	1	0	0	12	0	0	0
Cluster-10.142	0	1	2	203	0	0	421	0	0	0	0	0	0	0	0	0	0	1	0	0	0	711	0	0	0	7	10	2	1	2	2	0	1	0	13	0	0	0	0	0	0	0	0	0
Cluster-10.143	0	0	0	0	0	0	2	0	0	0	0	0	0	0	0	0	0	0	0	0	0	0	0	0	34	0	4	11	30	0	6	0	0	0	0	0	0	0	0	0	0	0	0	0
Cluster-10.144	0	0	0	0	802	0	0	0	0	0	0	0	0	0	0	0	6	173	0	0	16	0	0	0	0	0	0	0	0	0	0	0	0	0	129	0	0	0	0	0	0	0	0	0
Cluster-10.145	0	0	0	0	0	1	40	0	0	0	0	0	0	0	0	0	4	21	1	0	0	0	0	0	2	0	0	0	0	0	0	0	0	0	0	0	0	2	1	0	0	1	0	0
Cluster-10.146	0	0	0	0	0	0	0	0	0	0	298	0	0	0	0	0	0	0	0	0	0	0	0	0	1	0	0	0	0	32	0	0	0	0	0	0	0	0	0	0	0	0	0	0
Cluster-10.147	0	0	0	0	0	0	0	126	0	0	0	0	0	0	0	0	0	0	0	0	0	0	0	0	17	83	0	0	0	167	0	0	0	0	0	0	0	0	0	0	645	0	0	0
Cluster-10.148	0	0	0	2	0	0	0	0	4	4	0	0	0	0	0	0	0	0	0	0	0	0	0	0	0	0	0	0	0	6	0	0	0	0	0	0	0	0	0	0	0	0	0	0
Cluster-10.149	0	0	0	0	0	0	0	0	0	0	0	0	0	0	0	0	0	0	0	0	0	0	0	0	0	0	0	0	0	9	0	0	0	0	0	0	0	0	0	0	20	0	0	0
Cluster-10.150	0	0	0	0	0	0	0	0	0	0	0	0	0	49	0	0	0	0	0	0	0	0	0	0	0	0	0	0	0	16	0	0	0	0	0	0	0	0	0	0	0	0	0	0
Cluster-10.151	0	0	0	0	0	0	0	0	0	0	0	0	0	0	0	0	0	0	0	0	0	0	0	0	0	0	1	0	0	1417	1	0	0	0	1	0	1	0	1	0	0	0	0	0
Cluster-10.152	0	0	0	0	0	0	0	0	0	0	0	0	0	0	0	0	0	45	0	0	0	0	0	0	0	0	0	0	0	0	0	0	0	0	0	0	0	0	0	0	0	0	0	0
Cluster-10.153	0	0	0	0	0	0	0	0	0	0	0	0	0	0	0	0	0	0	0	0	0	0	0	0	0	0	0	0	0	0	0	0	0	0	0	0	0	0	0	0	0	0	11	0
Cluster-10.154	0	0	0	0	0	0	0	0	0	0	49	0	0	0	0	22	3	0	0	0	0	0	0	0	0	0	116	745	0	3805	171	4	0	0	0	1	0	0	0	0	0	0	0	0
Cluster-10.155	0	0	0	0	0	0	0	0	0	0	260	0	0	0	0	104	12	0	1	0	0	0	0	0	0	5	623	4524	6	27952	1195	13	0	0	2	3	3	2	1	3	2	0	0	0
Cluster-10.156	0	0	8	0	0	0	0	1	0	0	0	0	0	0	2	0	0	0	0	0	0	0	0	3	0	0	1	0	0	178	0	0	0	0	0	0	5	0	0	0	0	0	0	0
Cluster-10.157	0	0	0	0	0	0	0	0	0	0	0	0	0	0	0	0	0	0	0	0	0	0	0	0	0	0	0	0	0	282	0	0	0	0	0	0	0	1	0	0	0	0	0	0
Cluster-10.158	0	0	0	0	0	0	0	0	0	0	0	0	0	0	0	0	0	0	0	0	0	0	0	0	1368	0	0	0	0	7	0	0	0	0	0	0	0	0	1	0	0	0	0	0
Cluster-10.159	0	0	6	0	1	1	2	0	0	0	1297	0	1	3	1	0	0	1	0	0	0	0	0	1	7	1	1	8	1	5	5	1	0	1	0	0	5	0	0	1	6	1	0	0
Cluster-10.160	0	0	0	0	0	0	0	0	0	131	0	0	0	0	0	0	0	0	0	0	0	0	0	0	0	0	0	0	0	0	0	0	0	0	0	0	0	0	0	0	0	0	0	0
Cluster-10.161	0	0	0	0	0	0	0	0	0	0	0	0	0	0	0	0	0	0	0	0	0	0	0	0	0	8	0	7	0	142	1	0	0	0	0	0	0	0	0	0	0	2	0	0
Cluster-10.162	0	0	0	0	0	0	0	0	0	0	24	0	1	0	0	0	47	118	0	0	0	0	89	0	0	0	0	0	0	0	0	0	0	0	0	0	1	0	0	0	1	3	0	0
Cluster-10.163	0	0	0	0	0	0	0	0	0	0	0	0	0	0	0	0	0	0	0	0	0	0	0	0	0	18	0	0	0	1	0	0	0	0	0	0	0	0	0	0	0	1	0	0
Cluster-10.164	0	0	0	0	0	0	0	72	0	0	0	0	0	1	0	0	0	0	0	0	1	0	0	0	0	0	0	0	0	1	0	0	0	2	0	0	1	0	2	0	0	2	0	0
Cluster-10.165	0	0	6	0	0	0	1	2	2	0	2	0	2	12	1	0	5	0	10	0	2	7	0	0	2	314	11	10	7	65	2	6	0	2	5	0	2	10	4	3	5	2	0	1
Cluster-10.166	0	0	0	0	0	0	0	0	0	82	0	0	0	0	0	0	0	0	0	0	0	0	0	0	0	0	0	0	0	0	0	0	0	0	0	0	0	0	0	0	0	0	0	0
Cluster-10.167	0	0	0	0	0	0	0	0	0	0	84	0	0	0	0	0	0	0	0	0	0	0	0	0	0	0	0	0	0	0	0	0	0	0	0	0	0	0	0	0	0	0	0	0
Cluster-10.168	0	0	0	0	0	0	0	0	0	0	0	0	0	0	0	0	0	0	0	0	0	0	12	0	0	0	0	0	0	4	0	0	0	0	0	0	0	0	0	0	0	0	0	0
Cluster-10.169	0	0	0	0	0	0	0	0	0	0	0	0	0	0	0	0	0	0	0	0	0	0	0	0	0	10	0	0	0	1087	0	0	0	0	0	0	0	0	0	0	1	0	0	0
Cluster-10.170	0	0	0	0	0	0	0	0	0	0	0	0	0	0	0	0	0	0	0	0	0	0	0	0	37	1	0	0	0	0	0	0	0	0	0	0	0	0	0	0	0	0	0	0
Cluster-10.171	0	0	0	0	0	0	0	0	0	0	0	0	0	0	0	0	0	0	0	0	0	0	425	0	0	1	6	17	0	5	3	0	0	0	0	0	0	2	0	1	0	0	0	0
Cluster-10.172	0	0	0	0	0	0	0	0	0	0	0	0	0	0	0	0	0	0	0	0	0	0	0	0	0	4	0	0	0	0	0	0	0	0	0	0	0	0	0	0	0	0	26	0
Cluster-10.173	0	0	0	0	0	0	0	5	0	0	0	0	0	0	0	0	0	3	0	0	2	0	0	0	0	4	0	1	0	0	5	0	0	1	0	1	0	0	15	0	2	0	0	0
Cluster-10.174	0	0	47	0	2	0	0	0	1	0	0	0	0	0	902	0	0	3	0	0	0	0	0	0	3	0	0	0	0	0	0	0	0	0	0	0	0	0	0	2	0	1	0	0
Cluster-10.175	0	0	0	0	0	0	0	3	0	0	0	0	0	0	0	0	0	0	0	0	0	0	0	0	1	3	0	0	0	119	1	0	0	0	0	0	0	0	0	0	0	0	0	0
Cluster-10.176	0	0	0	0	0	0	0	0	0	0	0	0	0	0	0	0	0	0	0	0	0	0	0	0	1	2	1	1	14	9901	2	0	0	1	0	0	1	1	0	2	1	0	0	0
Cluster-10.177	0	0	0	2	0	0	0	0	0	0	14	0	0	0	0	0	0	0	398	0	0	0	0	0	3	0	0	0	0	0	0	2	0	0	0	0	1	0	0	0	0	0	0	4
Cluster-10.178	0	0	13	0	0	0	0	0	1	0	0	0	0	0	2	0	0	1	0	0	0	0	0	0	0	0	0	0	0	0	1	0	0	0	12	0	0	0	0	1	0	0	0	0
Cluster-10.179	0	0	0	0	0	0	0	0	0	0	0	0	0	0	0	0	0	0	0	0	0	0	0	0	56	2	0	0	0	0	0	0	0	0	0	0	0	0	0	0	0	0	0	0
Cluster-10.180	0	0	0	0	0	0	0	0	0	10	0	0	0	0	0	0	0	0	0	0	0	0	0	0	10	0	0	0	0	0	0	0	0	0	0	0	0	0	0	0	0	0	0	0
Cluster-10.181	0	0	0	0	0	0	6	0	0	0	0	0	5	994	0	8	0	0	0	0	0	0	0	0	0	1	0	0	0	258	0	0	0	0	0	0	0	0	0	0	1	2	0	0
Cluster-10.182	0	0	0	0	0	0	0	0	0	0	27	0	0	5	0	0	2	0	16	0	0	0	0	0	0	0	0	0	0	3	0	0	0	0	2	0	0	0	0	0	0	0	0	6
Cluster-10.183	0	0	0	10	0	0	0	0	0	0	0	0	0	0	0	0	0	0	6	0	0	8	0	0	476	0	0	0	0	0	0	13	0	0	2	0	0	0	0	0	0	1	0	0
Cluster-10.184	0	0	0	1	0	0	0	0	0	0	0	0	0	0	0	5	0	0	6	0	0	4	0	0	51	0	0	0	0	0	0	55	0	0	0	0	0	0	0	0	0	1	0	0
Cluster-10.185	0	1	101	0	3	0	0	0	12	0	0	0	0	0	31	0	0	0	0	0	0	0	25	1	0	0	2	4	0	11	1	0	0	1	0	0	0	0	0	0	1	0	0	0
Cluster-10.186	0	0	0	0	0	0	49	0	0	0	0	0	0	46	0	0	0	0	0	0	13	0	0	0	0	0	0	0	0	0	0	0	4	0	0	0	0	65	0	1	0	0	0	0
Cluster-10.187	0	0	0	3	0	0	0	0	0	0	0	0	0	0	0	1	0	0	0	0	0	25	0	0	81	0	0	0	0	0	0	21	0	0	0	0	0	0	0	0	0	0	0	0
Cluster-10.188	2	0	0	0	0	0	0	0	0	0	184	0	0	0	0	0	0	0	120	0	0	0	0	0	0	0	0	0	0	0	1	0	0	0	0	0	0	0	0	0	0	0	0	0
Cluster-10.189	1	0	0	0	0	12	0	0	0	0	0	0	11	0	0	0	0	0	15	0	7	0	0	13	65	0	0	0	0	1	0	0	0	12	58	0	83	0	4	0	90	1	0	0
Cluster-10.190	0	0	0	0	0	0	0	0	0	0	0	0	0	0	0	0	0	0	0	0	0	0	0	0	0	0	0	0	0	158	0	0	0	0	0	0	0	0	0	0	0	0	0	0
Cluster-10.191	0	0	0	0	0	0	0	0	0	0	0	0	0	80	0	0	8	0	0	0	0	0	0	0	0	0	0	0	0	77	0	0	0	0	0	0	0	0	0	0	0	0	0	0
Cluster-10.192	0	0	0	0	0	0	0	0	0	0	0	0	0	0	0	0	0	0	0	0	0	0	0	0	0	0	0	0	0	2442	0	0	0	0	0	0	0	0	0	0	0	0	0	0
Cluster-10.193	0	0	0	0	0	0	0	0	0	0	0	0	0	0	0	0	0	0	0	0	0	0	5	0	20	0	0	0	0	0	0	0	0	0	0	0	0	0	0	0	0	0	0	0
Cluster-10.194	0	0	0	0	0	0	0	0	0	0	0	0	0	0	0	0	0	0	0	0	0	0	39	0	0	0	55	11	30	3	26	0	0	0	4	0	0	308	0	0	0	0	0	0
Cluster-10.195	0	0	0	0	0	0	0	0	0	0	0	0	0	0	0	0	0	0	0	0	0	0	1	0	0	0	0	0	0	185	0	0	0	0	0	0	0	2	0	0	0	0	0	0
Cluster-10.196	0	0	0	0	0	1	0	0	0	0	0	0	0	0	0	0	0	0	0	0	0	0	2	0	0	0	15	16	0	0	8	0	0	0	0	0	0	0	0	10	0	0	0	0
Cluster-10.197	0	0	0	0	0	1	0	0	0	0	0	0	0	0	0	0	0	0	0	0	0	0	3	0	0	0	12	13	0	0	4	0	0	0	0	0	0	0	0	9	0	0	0	0
Cluster-10.198	276	0	0	0	0	0	0	0	0	0	0	0	3	55	0	0	2	0	0	0	0	0	0	0	0	0	1	10	0	0	15	1	0	28	0	4	0	0	60	1	64	0	0	0
Cluster-10.199	0	0	0	0	0	0	0	0	0	0	0	0	13	0	0	0	0	0	0	0	25	0	0	9	0	0	3	3	0	1	3	0	0	86	0	0	0	0	17	1	2	0	0	0
Cluster-10.200	0	0	0	0	0	0	0	0	0	0	0	0	0	1	0	0	0	0	0	0	0	0	0	0	0	1	0	0	0	0	0	0	0	0	822	0	1	28	0	0	1	0	501	0
Cluster-10.201	0	0	0	0	3	0	1	0	0	0	3	0	0	2	1	0	0	56	0	0	1	0	0	7	0	1	0	1	1	0	0	0	0	8	1	0	1	0	11	0	0	11	0	0
Cluster-10.202	0	0	0	0	1410	0	0	0	0	0	0	0	0	0	0	0	0	0	0	0	0	0	0	0	0	0	0	0	0	4	0	0	0	0	0	0	0	0	0	0	0	0	0	0
Cluster-10.203	0	0	0	0	0	0	0	0	0	0	0	0	0	0	0	0	0	0	0	0	16	0	0	0	0	0	0	0	0	0	0	0	0	0	0	0	0	0	0	0	0	0	0	0
Cluster-10.204	0	0	0	0	0	0	145	0	0	0	0	0	0	0	0	0	2	0	0	0	1	0	0	0	0	0	0	0	0	10	0	0	20	0	0	0	0	0	0	0	0	0	0	0
Cluster-10.205	0	0	0	0	0	0	0	39	0	0	0	0	0	0	0	0	0	0	0	0	3	0	0	0	0	0	0	0	0	0	0	0	0	0	0	0	0	0	0	0	0	0	0	0
Cluster-10.206	0	0	0	0	0	0	0	0	0	0	0	0	0	0	0	0	0	0	0	0	389	0	0	0	0	0	0	0	0	0	0	0	0	0	3	0	0	0	0	0	0	0	0	0
Cluster-10.207	0	0	0	0	0	0	0	0	0	0	0	0	0	0	0	0	0	0	40	0	0	0	0	0	0	0	0	1	0	0	1	0	0	0	0	0	0	0	0	0	0	0	0	1
Cluster-10.208	0	0	5	1	1	2494	22	0	25	0	1	0	0	1	6	0	0	0	22	0	1	1	1	1	1	2	1	5	3456	59	5	2	0	3	5	0	1	3001	3	4	1	1061	0	0
Cluster-10.209	0	0	0	0	0	0	0	0	0	0	0	0	0	0	0	0	0	0	39	0	0	0	0	0	0	0	0	2	1	0	0	14	0	2	0	0	0	0	0	0	0	1	0	0
Cluster-10.210	0	0	0	0	0	0	0	13	0	0	0	0	0	0	0	0	0	0	0	0	0	0	0	0	0	0	0	0	0	0	0	0	0	0	0	0	0	0	0	0	0	0	0	0
Cluster-10.211	0	0	0	0	0	0	0	0	0	0	0	0	0	174	0	0	30	0	0	0	0	0	0	0	0	0	0	0	0	2	0	0	0	0	0	0	0	0	0	0	0	0	0	0
Cluster-10.212	0	0	0	0	0	215	0	0	0	0	0	0	0	0	0	0	0	0	0	0	0	0	0	0	0	0	0	5	0	0	0	0	1	0	376	0	0	17	0	0	0	1	0	0
Cluster-10.213	0	0	0	0	0	0	0	0	1	0	0	0	0	0	0	0	0	0	0	0	0	0	0	0	43	0	0	0	0	0	0	0	0	0	0	0	0	0	0	0	0	0	0	0
Cluster-10.214	0	0	0	0	0	0	0	0	0	0	0	0	0	0	0	0	0	0	0	0	0	0	1	0	0	0	0	1	0	0	0	0	0	3	0	0	9	0	2	0	0	1	0	0
Cluster-10.215	0	0	0	0	0	0	0	0	0	0	0	0	0	0	0	4	0	0	1	0	0	0	0	0	1	0	0	0	0	0	0	14	0	0	0	0	0	0	0	0	0	0	0	0
Cluster-10.216	0	0	0	0	0	0	0	0	0	0	0	0	0	0	0	0	0	0	0	0	0	0	0	0	0	1	0	0	1	2590	0	0	0	0	0	0	0	1	0	1	0	0	0	0
Cluster-10.217	0	0	0	0	0	0	8	0	0	0	0	0	0	0	0	0	0	1	0	0	0	0	0	0	14	0	0	0	0	0	0	0	0	0	0	0	0	1	0	2	0	0	1	0
Cluster-10.218	0	0	0	0	0	0	0	0	0	0	0	0	0	0	0	0	0	174	0	0	0	0	1	0	0	0	0	0	0	2	0	0	0	0	0	0	0	0	0	0	0	0	0	0
Cluster-10.219	1	0	8	0	0	1	0	0	0	0	8	0	0	0	0	0	0	0	1	0	0	0	0	0	1	0	1	2	0	25	0	1	0	0	0	0	2	1	0	3	2	0	0	0
Cluster-10.220	0	0	19	1	98	4	3	0	33	64	59	0	16	409	15	0	0	3	0	0	45	3	2	27	26	0	40	64	60	54	42	12	0	75	6	0	36	0	86	0	0	16	0	9
Cluster-10.221	0	0	0	0	0	0	0	0	0	13	0	0	0	0	0	0	0	0	0	0	0	0	0	0	0	0	0	0	0	3	0	0	0	0	0	0	0	0	0	0	0	0	0	0
Cluster-10.222	19	0	1	9	18	8	3	1	3	3	13	0	1	926	3	15	1	0	1	0	7	13	73	0	5	0	0	0	0	0	0	2	17	3	0	0	1	0	0	0	0	191	15	8
Cluster-10.223	0	0	0	0	0	2	15	11	0	0	18	0	10	0	0	1	3	13	3	0	8	0	0	115	54	7	5	10	18	118	0	3	0	180	5	0	21	0	26	3	5	0	0	0
Cluster-10.224	0	0	0	5	0	0	0	0	0	0	0	0	0	0	0	0	0	0	35	0	0	217	0	0	0	0	0	2	0	20	9	0	0	0	0	0	0	0	0	0	0	0	0	0
Cluster-10.225	0	0	13	0	0	0	0	0	75	0	0	0	0	0	7	0	172	4	0	0	0	0	2	1	64	0	1	1	0	15	0	0	0	0	0	0	2	0	0	10	0	0	0	0
Cluster-10.226	0	1	0	0	47	0	0	0	0	0	0	0	0	4	0	0	0	0	0	0	5	0	17	0	0	0	0	0	0	0	0	0	0	0	0	0	0	0	0	0	0	0	0	0
Cluster-10.227	0	0	0	0	0	0	0	0	0	0	0	0	0	0	0	0	0	1	0	0	0	0	0	0	0	0	0	1	0	0	2	0	0	0	15	0	0	0	0	0	0	0	0	0
Cluster-10.228	0	0	0	0	15	0	0	0	0	0	0	0	0	6	0	0	0	0	0	0	13	0	22	0	0	0	0	0	0	0	0	0	0	0	0	0	0	0	0	0	0	0	0	0
Cluster-10.229	0	0	0	0	0	0	0	0	0	0	0	0	0	0	0	0	0	0	0	0	0	0	0	0	0	0	0	0	0	0	0	0	0	0	0	0	0	0	0	193	0	0	0	0
Cluster-10.230	1	0	0	0	0	0	0	0	0	1	0	0	0	0	1	0	25	0	0	0	0	0	2	0	0	2	8	12	1	4717	0	0	0	1	0	0	1	2	0	1	20	3	0	0
Cluster-10.231	0	0	0	0	0	0	0	0	0	0	0	0	0	0	0	0	1	0	0	0	0	0	0	0	0	0	0	2	7	0	2	0	0	0	0	0	0	0	0	0	0	0	0	0
Cluster-10.232	0	0	0	0	0	0	0	0	0	0	0	0	0	0	0	0	0	0	0	0	0	0	0	0	0	0	0	0	181	0	0	0	0	0	0	0	0	0	0	0	0	0	0	0
Cluster-10.233	0	0	0	0	0	0	0	0	0	0	0	0	0	0	0	0	70	0	27	0	0	0	0	0	0	0	0	0	0	0	0	0	0	0	0	0	0	0	0	0	0	0	0	0
Cluster-10.234	34	1	166	0	116	106	37	0	1	0	63	0	233	46	221	9	12	55	261	0	78	0	65	89	56	341	637	137	66	9	171	116	51	196	151	43	178	73	220	82	18	18	15	73
Cluster-10.235	0	0	0	0	0	0	0	0	0	0	0	0	0	0	0	0	3	0	0	0	0	0	0	0	0	0	0	0	1	0	0	0	0	0	0	0	0	0	0	0	0	5	0	36
Cluster-10.236	0	0	0	0	1	0	0	2065	0	0	0	0	0	4	0	1	1	0	0	0	0	1	1	0	0	0	0	0	5	0	0	0	1	2	1	0	0	0	0	1	10	0	0	0
Cluster-10.237	2	0	0	0	0	18	0	0	0	0	3	0	16	0	0	0	0	0	48	0	27	0	0	12	184	0	0	1	2	2	0	0	0	31	42	0	123	40	2	0	69	7	1	0
Cluster-10.238	0	0	177	0	52	0	1	0	0	0	511	0	0	0	40	0	0	0	0	0	0	0	0	0	0	0	1	2	19	5	0	0	0	0	0	0	0	1	1	0	0	0	0	18
Cluster-10.239	0	0	0	0	0	0	0	0	0	0	0	0	0	0	0	0	0	0	22	0	0	0	0	0	0	0	0	0	52	0	0	16	0	0	0	0	0	0	0	0	0	0	0	0
Cluster-10.240	0	2	0	0	0	0	0	0	0	0	0	0	0	12	0	0	0	0	0	0	51	0	144	0	0	0	0	0	0	0	0	0	0	0	0	0	0	0	0	0	0	1	0	0
Cluster-10.241	103	0	12	85	207	57	42	43	12	68	188	2	8	87	62	187	69	0	5	0	21	164	25	3	3169	1	6	0	4	19	0	10	141	50	41	1	6	939	3	2	0	104	241	45
Cluster-10.242	0	1	0	0	1	0	0	0	0	0	0	0	0	0	0	0	0	0	0	0	0	0	0	0	0	0	0	0	1	0	0	24	0	0	0	0	0	0	0	6	0	0	0	0
Cluster-10.243	0	0	0	0	0	0	0	0	0	0	0	0	0	0	0	0	0	0	0	0	0	0	0	0	0	0	0	0	40	0	0	0	0	0	0	0	0	0	0	0	0	0	0	0
Cluster-10.244	0	0	0	0	0	0	0	0	0	0	0	0	0	0	0	0	0	0	0	0	0	0	0	0	0	3	0	1	0	6666	0	0	0	0	2	1	0	2	1	0	0	0	0	0
Cluster-10.245	0	0	0	0	0	0	270	0	0	0	1	0	0	0	0	0	0	0	0	0	1	0	0	0	0	1	0	1	2	8220	0	0	0	0	0	0	1	1	0	1	1	0	0	0
Cluster-10.246	0	1	0	0	92	0	46	0	26	0	0	0	19	1	0	0	0	0	0	0	37	1	0	130	0	0	0	11	134	12	4	0	0	103	0	0	17	0	41	3027	151	0	0	0
Cluster-10.247	0	0	0	0	0	0	278	0	0	0	0	0	0	0	0	0	0	0	0	0	0	0	0	0	0	0	0	0	0	0	0	0	1	0	0	0	0	0	0	0	0	0	1	0
Cluster-10.248	0	0	8	0	0	0	0	0	1	1	0	0	0	0	8	0	0	0	0	0	0	0	0	0	0	0	0	0	0	1	0	0	0	0	0	0	0	326	0	0	1	0	0	0
Cluster-10.249	0	0	0	0	0	0	0	0	0	245	0	0	0	0	0	0	0	0	0	0	0	0	0	0	0	0	0	0	0	1	0	0	0	0	0	0	0	2	0	0	0	0	0	0
Cluster-10.250	0	0	1	0	0	5	0	252	0	1	2	0	0	0	0	0	0	0	0	0	0	0	0	0	0	83	0	0	0	118	0	1	0	0	0	0	0	0	0	0	335	0	0	0
Cluster-10.251	0	0	0	0	0	0	0	0	0	0	0	0	0	0	0	0	0	0	0	0	0	0	0	0	0	1	0	0	0	13	0	0	0	0	0	0	0	0	0	0	0	0	0	0
Cluster-10.252	0	0	0	0	0	0	0	0	10	0	0	0	0	0	94	6	0	0	0	0	0	0	0	0	0	0	0	0	0	0	0	0	0	0	0	0	0	0	0	0	0	0	0	0
Cluster-10.253	0	0	0	0	107	0	1	0	0	0	0	0	25	0	0	0	0	0	0	0	0	0	0	15	0	3	1	0	1770	0	0	0	0	31	0	0	109	0	2	0	0	0	0	0
Cluster-10.254	0	0	0	0	0	0	6	0	0	0	0	0	3	0	6	0	0	0	0	0	2	0	0	0	0	0	0	0	0	0	0	0	1	18	0	0	1	0	0	1	0	0	0	0
Cluster-10.255	0	0	0	0	0	0	149	0	0	0	0	0	149	0	0	0	0	0	0	0	0	0	0	0	0	0	0	0	0	10	0	0	0	0	0	0	10	0	0	0	0	0	0	0
Cluster-10.256	0	0	0	0	0	0	0	0	0	0	0	0	1	0	1	0	0	0	0	0	0	0	0	0	61	0	0	0	0	0	0	0	0	0	0	0	0	0	3	0	0	0	0	0
Cluster-10.257	0	0	0	0	0	0	0	61	0	2	15	0	0	0	0	0	0	0	0	0	0	0	0	0	0	0	0	0	0	0	0	0	0	0	0	0	0	0	0	0	0	0	0	18
Cluster-10.258	0	0	0	0	0	0	0	0	0	0	0	0	0	7	0	0	0	0	0	0	0	0	0	0	0	0	4	12	0	0	0	0	0	0	0	0	0	0	0	0	5	0	0	0
Cluster-10.259	0	0	0	0	0	0	0	0	0	0	0	0	0	0	0	0	0	0	0	0	0	0	0	0	0	0	0	0	0	0	0	0	0	0	0	0	0	0	0	0	0	0	0	42
Cluster-10.260	0	0	0	0	0	0	3	0	0	0	0	0	0	11	0	0	0	2	0	0	0	0	0	0	1	0	0	2	0	0	3	0	3	0	0	0	0	0	0	0	0	0	0	0
Cluster-10.261	0	0	0	0	0	0	0	0	0	0	0	0	0	0	0	0	0	0	0	0	0	0	18	0	0	0	0	0	0	5	0	0	0	0	0	0	0	0	0	0	0	0	0	0
Cluster-10.262	0	0	80	0	0	0	0	1	0	0	0	0	0	3	3	0	0	0	0	0	5	0	0	3	0	2	2	0	0	96	0	0	0	3	0	0	6	0	1	0	0	1	0	0
Cluster-10.263	0	0	0	0	0	0	0	0	0	0	0	0	0	1	0	0	0	0	0	0	0	0	47	0	0	0	0	0	0	0	0	0	0	0	0	0	0	0	0	0	0	0	0	0
Cluster-10.264	0	0	0	0	0	0	0	0	0	0	0	0	0	2	2	0	0	0	1	0	0	0	0	0	0	1	0	1	2	64	1	0	0	0	0	0	0	0	0	0	5	0	1	0
Cluster-10.265	0	0	123	0	415	0	0	0	0	0	1	0	0	0	47	0	1	0	1	0	0	0	0	0	20	0	0	0	17	4411	0	0	0	0	0	19	0	1	0	1	230	1	79	0
Cluster-10.266	0	0	0	0	0	0	0	0	0	0	0	0	0	0	0	0	0	2	0	0	0	0	0	0	0	0	1	1	0	26	0	0	4	0	0	0	0	0	0	0	3	0	0	0
Cluster-10.267	0	0	0	0	0	0	0	3	0	0	0	0	0	0	0	0	0	0	0	0	0	0	0	0	0	0	0	0	82	1	0	0	0	0	0	0	0	0	0	0	0	0	0	0
Cluster-10.268	0	0	0	0	0	0	0	0	0	0	0	0	0	0	3	0	0	23	0	0	0	0	0	0	0	0	0	2	0	0	2	0	0	0	1	0	0	0	0	0	2	0	0	0
Cluster-10.269	0	0	0	0	0	0	0	0	0	0	0	0	0	18	0	0	0	0	0	0	0	0	0	0	0	0	0	0	0	0	0	0	0	0	0	0	0	0	0	0	0	0	0	0
Cluster-10.270	0	0	0	0	0	0	0	0	0	0	0	0	0	1	0	0	0	0	0	0	0	0	0	0	0	0	0	0	0	136	0	0	0	0	0	0	0	0	0	0	0	0	0	0
Cluster-10.271	0	0	0	0	0	2	0	0	0	0	0	0	0	0	0	0	0	0	0	0	0	0	0	0	0	0	0	0	0	1	0	0	0	0	179	0	0	0	0	0	0	0	0	0
Cluster-10.272	0	0	7	0	0	0	0	0	0	0	0	0	0	0	1	0	0	0	0	0	0	0	0	0	0	0	0	0	6	562	0	1	0	2	0	0	2	0	18	5	0	0	0	0
Cluster-10.273	0	0	0	0	0	2	91	0	18	0	0	0	0	0	1	0	4	82	0	0	0	0	0	0	0	0	0	0	0	0	0	0	0	0	0	0	0	0	0	0	0	0	0	0
Cluster-10.274	0	0	0	2	0	0	0	0	0	2	0	0	0	28	0	0	0	0	0	0	0	37	0	0	0	0	15	79	0	0	0	0	0	1	0	0	0	0	0	4	19	0	0	0
Cluster-10.275	0	0	1	0	0	0	0	0	0	0	0	0	0	0	1	0	0	0	1501	0	0	0	2	0	0	68	0	7	0	2	3	0	0	0	0	0	0	3	1	0	0	1	0	376
Cluster-10.276	0	0	0	0	0	0	0	0	0	0	0	0	0	7	0	0	0	0	0	0	0	0	4	0	0	0	0	0	2	0	0	5	0	0	0	0	0	0	0	755	0	0	0	0
Cluster-10.277	0	0	0	0	0	0	52	0	0	0	0	0	0	0	0	0	0	1	0	0	0	0	0	0	0	0	0	0	0	1	0	0	1	0	160	0	0	0	0	0	0	0	0	0
Cluster-10.278	0	0	0	0	0	0	0	0	0	0	0	0	0	0	0	0	0	0	0	0	0	0	0	0	0	33	0	0	0	0	0	0	0	0	2	0	0	0	0	0	0	0	0	0
Cluster-10.279	0	7	0	0	0	0	0	0	0	2	1	0	1238	0	0	0	1	0	0	0	0	0	0	0	31	74	2	2	0	880	1	6	0	0	0	2	109	2	0	0	1161	0	1	0
Cluster-10.280	0	0	420	0	0	4	0	0	0	0	0	0	0	0	34	0	0	0	0	0	0	0	0	0	0	0	0	0	0	17	0	0	0	0	146	25	0	0	0	0	0	0	0	0
Cluster-10.281	0	0	10	0	0	0	0	0	0	0	248	0	0	0	14	0	0	0	0	0	0	0	0	0	0	0	0	0	0	0	0	0	0	0	0	0	0	0	0	0	0	0	0	0
Cluster-10.282	0	0	0	0	0	4	2	0	0	0	0	0	0	0	0	0	0	0	0	0	0	0	24	4	380	0	0	0	1	0	0	0	0	61	20	0	0	0	75	0	0	4	0	0
Cluster-10.283	2	0	0	0	0	0	0	0	0	0	0	0	21	1	0	0	0	0	0	0	0	0	0	0	0	0	0	0	0	0	0	0	0	0	0	0	9	0	0	0	0	0	0	0
Cluster-10.284	0	0	0	0	0	0	0	0	0	0	0	0	0	0	0	0	28	0	0	0	0	0	0	0	0	0	0	0	0	1	0	0	0	0	0	0	0	0	0	0	0	0	0	0
Cluster-10.285	0	0	0	0	0	0	2	0	0	0	0	0	353	0	1	1	0	0	1	0	1038	0	27	2034	16	0	3	1	89	4	1	64	0	1840	6	5	545	1	674	1	1	285	2	0
Cluster-10.286	0	0	0	0	0	0	0	0	0	0	0	0	2	0	0	0	0	0	0	0	6	0	0	1	0	0	0	0	0	0	0	0	0	19	0	0	0	0	0	0	0	0	0	0
Cluster-10.287	0	0	0	0	0	1	1	0	0	0	4155	0	0	0	0	0	0	0	65	0	0	0	1	0	0	0	0	0	0	0	0	0	0	0	0	0	0	0	0	0	0	0	0	0
Cluster-10.288	0	0	0	0	0	0	0	0	0	0	0	0	1	0	0	0	0	0	66	0	0	0	0	2	0	0	0	0	0	0	0	0	0	5	0	0	1	0	0	0	0	0	0	67
Cluster-10.289	0	0	0	3	0	0	0	0	0	0	0	0	0	0	0	0	0	0	0	0	0	10	0	0	0	0	0	0	0	3	0	0	0	0	0	0	0	0	0	0	0	0	0	0
Cluster-10.290	0	0	0	1	0	0	0	0	0	0	0	0	0	0	0	0	0	0	0	0	0	92	0	0	0	0	1	33	0	28	70	0	0	0	0	0	0	0	0	0	0	0	0	0
Cluster-10.291	0	0	0	0	0	0	0	0	0	0	0	0	0	0	0	0	0	0	0	0	0	0	0	0	0	0	0	0	817	0	0	0	0	0	0	0	0	0	0	0	0	0	0	0
Cluster-10.292	0	0	0	0	0	0	0	0	0	0	0	0	0	0	0	0	0	0	0	0	0	0	0	0	0	0	0	0	215	1	0	0	0	0	0	0	0	0	0	0	0	0	0	0
Cluster-10.293	0	0	9	0	0	0	0	0	0	0	0	0	0	0	11	0	0	0	0	0	0	0	4	0	0	0	0	0	0	1	0	0	0	0	0	0	0	0	0	0	0	0	0	0
Cluster-10.294	0	1	1	162	0	0	0	0	0	0	0	0	0	0	0	0	0	0	0	0	0	407	0	0	0	0	0	0	1	0	0	0	0	0	0	0	0	0	0	0	0	0	0	0
Cluster-10.295	0	0	0	0	0	0	0	0	0	0	0	0	0	0	0	0	0	0	0	0	0	0	0	0	0	0	0	0	448	0	0	0	0	0	0	0	0	0	0	0	0	0	0	0
Cluster-10.296	0	0	0	0	0	0	0	0	0	0	0	0	0	0	0	0	0	0	0	0	0	0	0	0	0	0	0	0	0	1846	0	0	0	0	0	0	0	0	0	0	0	0	0	0
Cluster-10.297	0	0	0	0	0	0	0	0	0	0	142	0	0	0	1	0	0	0	82	0	0	0	0	0	0	0	0	0	0	0	1	0	0	3	1	0	1	0	0	0	0	0	0	0
Cluster-10.298	0	0	0	0	0	0	0	0	0	0	0	0	0	0	0	0	0	0	0	0	0	0	0	0	0	0	0	0	0	0	0	0	0	0	0	0	0	0	0	13	0	0	0	0
Cluster-10.299	0	0	0	0	0	0	0	0	31	0	0	0	0	0	0	0	0	0	0	0	0	0	0	0	0	0	0	0	0	0	0	0	0	0	0	0	0	0	0	0	0	0	0	0
Cluster-10.300	0	0	0	0	0	0	0	0	0	2	0	0	0	0	0	0	0	0	0	0	0	0	0	0	0	0	0	0	0	3	0	0	0	0	0	0	0	0	0	0	0	0	0	200
Cluster-10.301	0	0	0	46	10	0	0	0	0	1	0	0	2	0	37	0	0	773	0	0	0	50	110	0	0	0	217	302	1	0	1	0	0	0	0	1	2	70	0	1	188	2	0	0
Cluster-10.302	0	0	0	0	0	0	0	0	0	0	0	0	0	0	0	0	0	0	0	0	0	0	0	0	0	2	1	0	0	11251	2	1	0	3	2	0	2	0	1	2	1	0	0	0
Cluster-10.303	0	0	0	0	0	0	0	0	0	40	0	0	0	0	0	0	0	0	0	0	0	0	0	0	0	0	0	0	0	0	0	0	0	0	0	0	0	0	0	0	0	0	0	0
Cluster-10.304	0	0	0	0	130	0	0	0	0	0	0	0	0	0	0	0	0	0	0	0	0	0	0	0	0	0	0	0	0	0	0	0	0	0	0	0	0	0	0	0	69	0	17	0
Cluster-10.305	0	0	0	0	0	0	0	0	0	0	0	0	0	0	0	0	0	6	0	0	0	0	0	0	0	7	0	0	0	0	0	0	0	0	60	10	0	0	0	0	40	0	0	0
Cluster-10.306	0	0	1	0	0	0	2	1	51	0	0	0	2	0	0	0	0	4	4	0	0	0	0	1	3	0	2	6	30	33	3	0	0	0	0	0	1	0	0	0	2	0	0	0
Cluster-10.307	0	0	0	0	0	0	0	0	0	0	0	0	5	0	0	0	0	0	0	0	0	0	0	1	0	0	3	2	0	0	0	0	0	11	0	0	1	90	45	0	1	0	0	0
Cluster-10.308	0	1	0	0	0	0	723	0	0	12	71	0	0	2	1	0	1	0	0	0	7	0	22	0	0	0	0	0	0	1	0	0	24	0	0	0	0	0	0	0	0	0	0	85
Cluster-10.309	0	0	0	0	0	0	0	0	0	0	0	0	0	0	0	0	0	0	0	0	0	0	0	0	0	0	0	0	0	17	0	0	0	0	0	0	0	0	0	0	0	0	0	0
Cluster-10.310	0	0	0	0	0	0	0	0	0	0	0	0	0	0	0	0	0	0	0	0	0	0	0	0	0	1	2	0	0	2102	0	0	0	0	0	0	0	1	0	0	0	0	0	0
Cluster-10.311	0	0	0	0	0	0	0	0	11	0	0	0	0	0	0	0	0	0	0	0	0	0	0	0	0	0	0	0	493	0	0	0	0	0	0	0	0	0	0	0	0	0	0	0
Cluster-10.312	0	0	0	0	0	0	0	0	0	0	0	0	11	0	0	0	0	0	0	0	0	0	0	1	0	1	1	8	45	0	19	0	0	35	146	0	4	0	71	0	7	0	0	0
Cluster-10.313	0	0	0	0	0	0	0	8	0	0	0	0	0	0	0	0	0	0	0	0	0	0	0	0	0	0	0	0	0	0	0	3	0	0	0	0	0	0	0	0	0	0	0	0
Cluster-10.314	0	0	0	0	0	0	0	0	3	0	0	0	0	0	0	0	0	0	0	0	0	0	0	0	0	0	0	0	97	0	0	0	0	0	0	0	0	0	0	0	0	0	0	0
Cluster-10.315	3	0	4	15	2	8	5	0	1	20	62	0	0	10	36	21	5	19	3048	0	1	3	10	0	25	19	8	19	0	16	17	56	15	0	0	0	0	0	0	0	6	0	2	227
Cluster-10.316	0	0	0	0	0	0	0	1	0	0	0	0	0	0	0	0	0	0	0	0	0	0	0	0	0	0	0	0	0	1	0	14	0	0	0	0	0	0	0	0	0	0	0	0
Cluster-10.317	4	1	0	4	5	2	1	2	0	1	3196	0	3	6	1	9	1	1	498	0	0	5	2	1	4	0	0	0	0	3	0	1	12	4	0	0	0	0	0	0	0	3	4	121
Cluster-10.318	0	0	0	0	0	0	0	0	0	0	0	0	0	0	0	0	0	0	0	0	0	0	0	0	0	0	0	0	0	339	0	0	0	0	0	0	1	1	0	0	0	0	0	0
Cluster-10.319	0	0	3	0	0	0	0	0	0	0	0	0	0	0	9	0	0	0	0	0	0	0	3	0	0	0	0	0	0	1	0	0	0	0	0	0	0	0	0	0	0	6	0	0
Cluster-10.320	0	0	0	0	0	0	0	0	0	0	27	0	0	0	0	0	0	0	0	0	0	0	0	0	0	0	0	0	0	0	0	0	0	0	0	0	0	0	0	0	0	0	0	0
Cluster-10.321	0	0	0	0	0	0	424	0	0	0	2	0	0	0	0	0	0	0	1	0	8	0	0	0	1	0	0	0	0	0	0	0	0	1	0	0	0	3	8	0	0	1	0	0
Cluster-10.322	0	2	165	0	0	0	0	0	0	0	0	0	0	0	119	0	0	0	0	0	0	0	0	0	0	0	0	0	0	0	0	0	0	0	0	0	0	0	0	0	0	0	0	0
Cluster-10.323	0	0	0	0	0	0	0	0	0	1	0	0	0	0	0	0	0	0	0	0	0	0	0	0	0	0	0	0	0	192	0	0	0	0	0	0	0	0	0	0	0	0	0	0
Cluster-10.324	1	0	0	1	0	0	0	0	1	0	1	0	0	1	2	2	0	0	0	0	0	1	0	0	1	0	0	0	0	0	0	0	0	0	0	0	0	43	0	0	0	0	245	0
Cluster-10.325	0	0	0	0	0	0	0	0	0	0	104	0	0	0	0	0	0	0	0	0	0	0	0	0	0	0	0	0	0	1	0	0	0	0	0	0	0	0	0	0	0	0	0	0
Cluster-10.326	0	0	0	0	0	0	0	0	0	0	0	0	0	0	0	0	0	4	0	0	0	0	0	0	0	9	0	0	0	0	0	0	0	0	58	8	0	0	0	0	62	0	0	0
Cluster-10.327	0	0	5	11	1	0	1	0	1	0	1	0	0	0	49	0	1	11	5	0	0	1	0	0	2	0	1	4	0	4	7	0	1	0	0	0	0	0	0	0	0	0	0	3
Cluster-10.328	0	0	0	0	82	0	0	9	0	0	0	0	1	0	0	0	0	0	0	0	0	0	0	0	0	0	0	0	0	0	0	0	0	2	0	0	0	0	9	0	0	0	0	0
Cluster-10.329	0	0	0	0	0	0	0	0	0	0	103	0	0	0	0	0	0	0	0	0	0	0	0	0	0	0	0	0	0	1392	0	0	0	1	0	0	0	0	0	0	0	0	0	28
Cluster-10.330	0	0	0	0	0	0	0	0	0	0	0	0	0	0	0	0	0	33	0	0	0	0	0	0	0	35	0	0	0	0	0	0	0	0	151	21	0	0	0	0	205	0	0	0
Cluster-10.331	1	0	0	0	0	0	0	0	0	1	163	0	0	0	1	17	0	0	59	0	0	1	0	1	0	0	0	0	1	1	0	248	0	1	0	0	0	0	0	0	0	0	0	34
Cluster-10.332	0	0	0	0	11	0	506	0	0	0	0	0	484	0	0	0	0	165	1	1	35	0	0	64	0	0	0	0	0	170	0	0	0	137	44	15	84	1	88	0	0	0	0	0
Cluster-10.333	0	0	0	0	469	0	1	0	0	0	0	0	137	0	0	0	7	0	0	0	24	0	1	0	0	3	6	12	424	201	0	0	0	0	102	0	136	0	1	0	0	0	0	0
Cluster-10.334	0	0	1	0	0	0	0	0	0	0	0	0	0	2	0	0	0	0	0	0	0	0	0	1	0	0	2	9	0	0	11	0	0	2	0	0	0	0	4	0	0	0	0	0
Cluster-10.335	0	0	7	0	0	1	1	0	1	0	11	0	0	3	1	0	1	7	1	0	1	0	0	2	18	0	3	26	2	25	6	3	0	4	0	0	6	1	0	3	8	3	2	0
Cluster-10.336	0	0	1	0	0	0	4	1	0	0	6	0	225	0	0	0	0	1	8	0	0	0	0	28	1	1	0	0	2	3	0	47	1	807	6	0	3	2	1336	1	0	0	0	0
Cluster-10.337	0	0	0	1	0	0	1	47	0	0	1446	0	0	0	0	0	0	0	1	0	0	0	0	0	0	0	0	0	0	0	0	0	0	0	0	0	0	0	0	0	0	0	0	138
Cluster-10.338	0	0	0	5	1	0	0	0	1	0	2	0	0	0	0	0	0	0	5	0	0	6	0	0	0	3	1	0	1	9582	1	2	0	2	2	1	1	0	1	0	2	0	0	0
Cluster-10.339	0	0	0	0	0	0	0	0	0	0	0	0	0	0	0	0	0	0	0	0	0	0	0	0	159	0	0	0	0	7	0	0	0	0	0	0	0	0	0	0	0	0	0	0
Cluster-10.340	0	0	0	0	0	0	0	0	0	0	0	0	0	0	0	0	0	0	0	0	0	0	0	0	0	1	0	0	0	2643	0	0	0	0	0	0	0	0	0	1	0	0	0	0
Cluster-10.341	1	0	0	0	0	0	0	0	0	0	0	0	0	0	0	0	12	1	0	0	0	0	0	0	0	0	0	0	0	0	0	0	0	0	0	0	0	0	0	14	0	0	0	0
Cluster-10.342	0	0	0	0	0	0	1673	0	0	0	1	0	0	0	1	0	1	0	1	0	0	0	0	0	0	0	0	0	0	1	0	0	8	0	0	0	0	3	0	0	0	0	0	0
Cluster-10.343	0	0	117	0	26	0	0	0	0	0	412	0	0	0	14	0	0	0	0	0	0	0	0	0	0	0	0	0	0	0	0	0	0	0	0	0	0	0	0	0	0	1	0	13
Cluster-10.344	0	0	0	0	0	0	0	0	0	0	0	0	0	0	0	0	0	0	0	0	7	0	0	0	0	7	0	0	0	2	0	0	0	0	0	0	0	0	0	0	0	0	0	0
Cluster-10.345	0	1	0	0	0	0	7	0	0	0	0	0	0	0	0	0	0	1	0	0	0	0	0	0	4	0	0	0	0	0	0	0	0	0	0	0	0	0	0	0	0	0	0	0
Cluster-10.346	0	0	0	0	0	0	0	0	0	0	0	0	0	0	0	0	0	0	0	0	0	0	0	0	0	0	0	0	2	0	0	21	0	0	0	0	0	0	0	0	0	2	0	0
Cluster-10.347	0	0	0	0	0	0	0	0	0	0	9	0	1	0	0	0	0	0	0	0	1	1	1	4	0	7	0	0	2	46	0	0	0	4	0	0	6	0	7	0	0	0	0	12
Cluster-10.348	0	0	18	2	50	120	22	55	27	9	49	0	42	99	13	7	14	39	0	0	26	8	0	25	908	3	26	44	67	547	19	195	0	74	248	4	31	2	48	26	21	25	0	8
Cluster-10.349	0	0	0	0	0	0	0	0	0	0	0	0	0	0	0	0	0	0	0	0	0	0	0	0	0	0	0	0	0	4	0	0	0	0	635	0	0	0	0	0	0	0	0	0
Cluster-10.350	0	0	0	0	0	0	5	0	0	0	0	0	0	0	0	0	0	1	0	0	0	0	0	0	8	0	0	0	0	0	0	0	0	1	4	0	0	0	0	1	0	0	2	0
Cluster-10.351	0	30	4	0	5	0	31	2	0	0	9	0	4	94	0	1	0	8	1	0	234	0	776	0	8	4	1	13	1	1	1	9	1	2	5	0	0	2	0	15	0	1	0	2
Cluster-10.352	0	0	0	57	0	0	48	0	0	0	4	0	0	0	0	0	0	0	0	0	0	31	0	0	0	0	0	0	1	0	0	0	0	0	0	0	0	0	0	0	0	0	0	0
Cluster-10.353	18	0	35	0	0	0	1	0	0	0	0	0	0	1	13	0	0	0	1	0	0	1	0	0	1	0	0	0	0	1	1	0	0	0	3	0	0	1	0	0	0	0	0	0
Cluster-10.354	1	1	91	10	0	0	0	15	0	0	0	0	0	0	32	0	0	0	0	0	7	1	0	0	0	0	0	0	6	0	0	0	0	5	0	0	3	0	10	48	0	0	0	0
Cluster-10.355	0	0	0	0	0	0	0	0	0	0	0	0	0	0	0	0	0	0	0	0	0	0	0	0	0	0	0	0	24	1	0	0	0	0	0	0	0	0	0	0	0	0	0	0
Cluster-10.356	0	0	0	0	0	0	0	0	0	0	0	0	0	4	0	0	0	0	0	0	0	0	30	0	0	0	17	98	3	1	189	0	0	0	0	0	0	0	0	0	0	0	0	0
Cluster-10.357	0	3	0	2	186	0	0	0	0	0	0	0	10	0	0	0	0	0	0	0	0	1	0	8	0	2	85	1120	230	8	599	0	1	34	0	0	0	0	24	10	90	4	0	0
Cluster-10.358	0	0	0	1	0	0	1	0	0	0	0	0	0	0	0	0	0	1	363	0	0	0	0	0	0	0	0	0	0	0	0	0	0	0	0	0	0	0	0	0	0	0	0	323
Cluster-10.359	0	0	0	0	0	0	0	0	0	0	150	0	0	0	0	0	0	0	0	0	0	0	0	0	0	0	113	128	0	0	76	0	0	0	0	0	0	0	0	0	0	0	0	0
Cluster-10.360	0	0	0	0	0	0	0	0	0	0	0	0	0	0	0	0	0	0	0	0	0	0	0	0	0	0	0	0	0	0	0	0	0	0	0	0	0	0	1	47	0	0	0	0
Cluster-10.361	0	0	2	0	0	2	1	0	2	0	2	0	1	3	2	1	0	3	2	0	1	0	0	0	19	0	0	6	1	10	4	3	0	3	0	0	10	0	2	1	4	1	0	0
Cluster-10.362	0	0	0	0	0	0	0	0	0	0	0	0	2	0	0	0	0	0	0	0	1	0	0	0	0	0	0	0	0	1	0	0	0	0	0	0	12	0	2	0	0	0	0	0
Cluster-10.363	0	0	0	0	0	0	2	0	0	0	398	0	0	0	0	0	0	0	0	0	0	0	0	0	0	0	0	0	0	1717	0	0	0	0	0	0	0	0	2	1	0	0	0	63
Cluster-10.364	0	0	0	0	0	0	0	0	0	12	0	0	0	0	0	0	0	0	0	0	0	0	0	0	0	0	0	0	1	0	0	0	0	0	0	0	0	1	0	0	0	0	0	0
Cluster-10.365	0	0	0	0	0	0	0	0	0	0	285	0	0	0	0	0	0	0	0	0	0	0	0	0	0	1	1	1	0	2108	0	0	0	0	0	0	0	0	0	0	0	0	0	25
Cluster-10.366	0	0	0	0	0	0	0	0	0	0	0	0	0	0	0	0	0	0	0	0	0	0	0	0	0	0	0	0	285	1	0	0	0	0	0	0	0	0	0	0	0	0	0	0
Cluster-10.367	0	0	0	0	0	0	0	0	0	0	331	0	0	0	0	0	0	0	2	0	0	0	0	0	0	0	0	0	0	0	0	0	0	0	1	0	0	0	0	0	0	0	0	77
Cluster-10.368	0	0	0	0	0	0	0	0	0	0	0	0	0	0	0	0	0	0	0	0	0	0	0	0	0	0	0	0	429	0	0	0	0	0	0	0	0	0	0	0	0	0	0	0
Cluster-10.369	3	0	1	0	0	1	0	0	0	0	0	0	0	0	2	0	0	0	1	0	0	0	0	0	6	0	3	4	0	10	3	5	0	1	0	0	7	0	1	0	2	0	0	0
Cluster-10.370	0	0	0	1	0	160	1	7	0	0	3	0	3	1	0	0	135	10662	3	0	0	0	0	2	0	1	11	11	1	15	22	2	0	0	0	0	0	0	0	11	0	28	2	0
Cluster-10.371	0	0	0	0	0	0	0	0	0	0	0	0	0	0	0	0	0	0	0	0	0	0	0	0	0	0	0	0	0	0	0	0	0	0	0	0	0	0	0	43	0	0	0	0
Cluster-10.372	0	0	0	0	0	0	0	0	0	0	0	0	0	0	0	0	85	0	0	0	0	0	0	0	0	0	0	0	2	0	0	1	0	0	0	0	0	0	0	0	0	0	0	0
Cluster-10.373	0	0	0	14	0	0	291	0	0	0	899	0	0	0	0	11	0	3	1948	0	0	273	0	0	0	0	0	0	1	1	0	1049	84	4	7	0	0	0	11	0	0	0	0	9
Cluster-10.374	0	0	0	0	6	0	266	0	13	16	1	0	4	0	0	0	0	0	0	0	1	0	0	0	0	2	1	1	0	10131	0	0	0	0	0	2	2	1	0	2	5	0	0	0
Cluster-10.375	0	0	0	0	0	0	0	0	0	157	0	0	0	0	0	0	0	0	0	0	0	0	0	0	0	0	0	0	12	19	0	0	0	0	0	0	0	0	0	0	0	0	0	0
Cluster-10.376	0	0	0	0	0	0	0	0	0	0	0	0	0	0	0	0	0	0	0	0	0	0	0	0	0	0	0	0	0	0	0	0	0	0	41	0	0	9	0	0	2	7	0	0
Cluster-10.377	7	0	0	7	18	3	5	3	0	5	13	0	0	7	4	6	3	0	0	0	1	18	1	0	5	12	1	1	0	1287	0	0	12	0	0	0	0	0	0	0	0	6	9	0
Cluster-10.378	0	0	0	53	0	0	172	0	0	3	7	0	0	0	0	0	0	105	0	0	1	58	0	0	0	0	0	0	0	64	0	0	5	0	825	0	0	0	0	1	0	0	0	3
Cluster-10.379	1	0	0	0	0	1	2	1	0	0	0	0	4	0	0	0	0	0	3	0	5	0	0	1	26	0	0	2	1	34	1	1	0	6	12	0	20	0	1	1	21	1	0	0
Cluster-10.380	0	0	0	0	0	0	0	0	0	0	0	0	5	0	0	0	0	0	0	0	0	0	87	0	0	0	0	0	0	0	0	0	0	0	0	0	84	2	2	0	0	0	0	0
Cluster-10.381	1	0	0	0	0	3	0	0	0	0	0	0	18	0	0	0	0	0	9	0	12	0	0	4	54	0	0	0	0	1	0	0	0	24	11	0	36	2	0	0	3	7	0	0
Cluster-10.382	0	0	0	0	0	1	0	0	0	0	0	0	0	0	0	0	13	0	0	0	0	0	0	0	0	0	0	0	3	0	0	0	0	0	0	0	0	0	0	3	0	2	0	0
Cluster-10.383	0	0	0	0	0	0	0	0	25	0	0	0	0	0	0	0	0	0	0	0	0	0	0	0	0	0	0	0	1	3	0	0	0	0	0	0	0	0	0	0	0	0	0	0
Cluster-10.384	0	0	0	0	0	0	0	0	0	0	0	0	0	0	0	0	0	0	0	0	0	0	0	0	0	0	0	0	48	0	0	0	0	0	0	0	0	0	0	0	0	0	0	0
Cluster-10.385	0	0	0	2	0	0	1857	0	0	0	1	0	0	0	0	0	0	0	3	0	152	8	0	0	0	24	0	2	0	6	1	0	9	0	0	12	1	1	0	0	0	0	0	0
Cluster-10.386	0	0	0	0	0	0	0	50	0	0	0	0	0	0	0	0	0	0	0	0	0	0	0	0	0	19	0	0	0	1	0	0	0	0	0	0	0	0	0	0	117	0	0	0
Cluster-10.387	0	0	0	0	0	0	0	0	0	27	0	0	0	0	0	0	1	0	0	0	0	0	0	0	0	0	0	0	0	2	0	0	0	0	0	0	0	0	1	0	0	0	0	0
Cluster-10.388	1089	0	0	0	0	0	0	12	0	5	0	0	0	2089	0	0	0	1	0	0	0	0	0	0	0	0	0	2	0	0	0	6	0	0	0	4	0	1	0	1	69	1	0	0
Cluster-10.389	0	0	0	0	0	0	0	0	0	0	40	0	0	1	0	0	0	0	20	0	0	0	0	0	0	0	0	0	0	0	0	0	0	0	0	0	0	0	0	0	0	0	0	9
Cluster-10.390	0	0	46	0	0	0	0	0	7	0	0	0	0	6	5	0	0	0	0	0	2	0	0	8	180	0	0	0	0	0	0	0	0	8	0	0	0	0	7	0	0	0	0	0
Cluster-10.391	15	0	0	0	0	1	0	0	0	0	4	0	29	0	1	0	0	0	0	0	44	5	2	10	0	0	0	0	1	0	0	0	0	195	0	0	0	0	12	0	0	0	0	0
Cluster-10.392	0	0	0	0	0	0	0	0	0	0	19	0	0	0	0	0	0	0	10	0	0	0	0	0	0	0	0	0	0	0	0	0	0	0	0	0	0	0	0	0	0	0	0	4
Cluster-10.393	0	0	0	0	0	0	0	0	0	0	67	0	0	0	0	0	0	0	20	0	0	0	0	0	0	0	0	0	0	0	0	0	0	0	0	0	0	0	0	0	0	0	0	27
Cluster-10.394	1	0	37	0	0	0	0	0	6	0	2	0	0	0	252	0	0	0	1	0	0	0	0	0	0	0	0	1	0	12	2	0	0	0	0	0	0	0	0	0	0	0	0	1
Cluster-10.395	0	0	0	0	0	0	0	0	0	4	33	0	0	1	0	0	1	0	24	0	0	0	0	0	0	0	0	0	0	0	0	0	0	0	0	0	0	0	3	0	0	0	0	18
Cluster-10.396	0	0	0	0	0	0	0	0	0	0	0	0	0	0	0	0	0	0	0	0	0	0	0	0	0	25	0	0	0	0	0	0	0	0	0	0	0	0	0	0	0	0	0	0
Cluster-10.397	0	0	0	0	0	0	0	0	0	0	2	0	0	9	0	0	0	0	0	0	0	0	0	0	0	0	0	0	1151	97	0	0	0	0	0	0	0	1	1	0	0	0	0	0
Cluster-10.398	0	0	0	0	0	0	0	54	0	0	0	0	0	0	0	2	0	0	0	0	0	0	0	0	19	0	0	0	0	2	0	30	0	0	0	0	0	0	0	0	0	0	0	0
Cluster-10.399	0	0	0	0	0	0	0	0	0	0	0	0	0	0	0	0	0	26	0	0	0	0	0	0	0	0	0	0	0	0	0	0	0	0	0	0	1	0	0	0	0	0	0	0
Cluster-10.400	0	0	0	0	0	0	88	0	0	0	0	0	0	0	0	0	0	93	0	0	0	0	0	0	0	0	0	0	0	0	0	0	10	0	0	0	0	0	0	0	9	0	0	0
Cluster-10.401	0	0	0	0	0	0	30	0	0	0	0	0	0	0	0	0	0	0	0	0	0	0	0	0	0	0	0	0	0	0	0	0	0	0	0	0	0	0	0	0	0	0	0	0
Cluster-10.402	0	0	0	0	0	0	115	0	0	0	0	0	0	0	0	0	0	109	0	0	0	0	0	0	0	0	0	0	0	0	0	0	4	0	0	0	0	0	0	0	18	0	0	0
Cluster-10.403	0	0	0	0	0	0	0	0	0	91	0	0	0	0	0	0	0	0	0	0	0	0	0	0	0	0	0	0	0	5	0	0	0	0	0	0	0	0	0	0	0	0	0	0
Cluster-10.404	0	0	0	0	0	0	347	0	1	0	1	0	0	0	0	0	1	278	0	0	0	0	0	0	0	0	0	1	0	3	0	0	39	0	0	0	0	0	1	0	0	0	0	0
Cluster-10.405	0	0	0	0	0	0	0	0	0	0	0	0	0	0	0	0	0	0	0	0	0	0	0	0	0	0	0	0	1	1799	0	0	0	0	0	0	0	0	1	0	0	0	0	0
Cluster-10.406	0	0	0	0	0	0	0	0	0	0	0	0	0	0	0	0	0	0	0	0	0	0	0	0	0	2	1	1	0	9465	0	0	0	0	1	1	3	0	9	0	0	0	0	0
Cluster-10.407	0	0	0	73	0	0	0	0	0	0	0	0	0	0	0	0	0	0	0	0	0	568	0	0	0	0	0	0	0	0	1	0	0	0	0	0	0	0	0	0	0	0	0	0
Cluster-10.408	0	0	0	0	0	0	17	0	0	0	24	0	0	0	0	0	0	22	0	0	0	0	0	0	0	0	225	311	0	0	8	0	1	0	0	0	0	0	0	0	118	0	0	0
Cluster-10.409	0	0	0	0	0	0	0	0	0	0	0	0	0	36	0	0	0	0	0	0	0	0	0	0	0	0	0	1	1	0	0	0	0	0	0	0	0	2	0	0	0	0	0	0
Cluster-10.410	0	0	0	105	0	0	0	0	0	0	0	0	19	0	0	0	0	0	0	0	78	227	0	52	0	0	0	0	0	0	0	0	0	183	0	0	1	0	87	0	0	0	0	0
Cluster-10.411	0	0	5	0	0	6	0	0	0	7	3	0	0	0	0	1	0	0	1	0	0	0	0	0	1	2	0	2	1	177	1	7	0	0	9	0	0	0	0	0	1	1	0	0
Cluster-10.412	0	0	0	0	0	0	0	0	0	0	0	0	0	0	0	0	0	0	0	0	0	0	0	0	0	0	0	2	0	1	0	1	0	0	279	0	0	0	0	0	0	0	5	0
Cluster-10.413	3	1	125	0	77	5	46	0	0	0	134	0	30	42	14	12	0	61	86	0	37	0	23	11	0	38	90	260	83	2	17	220	3	70	88	5	46	8	9	139	0	5	0	30
Cluster-10.414	0	0	7	112	40	3	0	0	0	17	0	0	24	0	93	0	0	1947	0	0	0	209	313	0	0	3	0	0	4	0	0	0	0	1	9	7	16	0	0	0	11	5	0	0
Cluster-10.415	0	0	0	0	0	34	0	0	0	0	0	0	0	1	0	0	0	0	0	0	0	0	0	0	0	6	6	6	4	44	0	6	3	3	29194	2	2	1459	5	94	8	0	0	0
Cluster-10.416	0	0	0	1	0	0	104	0	0	0	0	0	0	2937	0	0	0	2	0	0	0	0	0	0	0	0	1	0	0	66	0	0	0	0	2	0	0	0	0	0	0	1	0	0
Cluster-10.417	0	0	16	0	0	0	0	0	0	0	0	0	0	0	11	0	1	0	0	0	2	0	0	0	0	0	0	0	0	0	0	0	0	0	1	21	0	0	0	0	0	0	0	183
Cluster-10.418	0	0	1	0	5	1	0	0	0	0	0	0	3	0	0	1	0	0	0	0	0	0	0	0	0	3	0	1	0	0	0	2	0	0	0	0	39	0	0	0	0	0	0	0
Cluster-10.419	175	0	0	0	1	0	0	0	0	3	0	0	0	0	0	0	0	0	0	0	0	0	0	0	3	0	3	6	0	10	1	0	0	0	0	0	0	0	0	0	0	2	0	0
Cluster-10.420	0	1	336	0	0	0	18	0	68	0	0	0	7	48	55	0	6	0	0	0	25	0	0	110	0	0	0	0	0	0	0	0	0	88	0	3	11	0	66	0	62	0	0	0
Cluster-10.421	0	0	21	14	5	128	0	2	1	168	22	0	5	0	0	4	2	3	13	0	1	9	2	0	24	143	1	21	24	64	2	13	0	2	218	15	38	3	2	7	37	3	0	4
Cluster-10.422	0	0	0	0	0	0	0	0	0	55	0	0	0	0	0	0	0	0	0	0	0	0	0	0	0	0	0	0	0	0	0	0	0	0	0	0	0	0	0	0	0	0	0	0
Cluster-10.423	0	0	10	0	0	0	0	1	3	0	0	0	12	1	6	0	1	0	1	0	34	0	6	18	13	4	5	8	3	43	5	5	0	95	0	1	6	3	67	2	4	0	0	0
Cluster-10.424	0	0	0	0	0	0	0	0	0	21	0	0	0	0	0	0	0	0	0	0	0	0	0	0	0	0	0	0	0	0	0	0	0	0	0	0	0	0	0	0	0	0	0	0
Cluster-10.425	27	3	1	1896	42	9	10	5	0	7	55	0	1	7	10	17	1	1	14	1	8	2963	7	9	10	1	0	0	1	5283	0	4	30	124	2	1	18	0	214	1	1	45	29	8
Cluster-10.426	0	0	1	0	0	0	0	0	1	513	0	0	0	1	0	0	0	0	0	0	0	0	0	0	1	72	2	0	1	1165	1	2	0	1	0	0	1	1	3	4	1	0	0	0
Cluster-10.427	1	0	1	0	0	0	0	0	0	708	0	0	0	0	1	0	0	0	0	0	1	0	0	0	0	26	1	2	0	357	0	0	0	0	0	0	0	1	1	0	0	0	0	0
Cluster-10.428	0	0	0	0	0	0	0	0	5	0	0	0	0	0	0	0	6	0	0	0	0	0	0	0	0	0	0	0	0	0	0	0	0	0	2	0	0	0	0	0	0	0	0	0
Cluster-10.429	0	0	0	0	0	0	0	0	0	9	0	0	0	0	0	0	0	0	0	0	0	0	0	0	0	0	0	1	0	0	0	0	0	0	0	0	0	0	0	0	0	1	0	0
Cluster-10.430	0	0	0	0	0	0	0	0	0	0	0	0	0	0	0	0	0	0	0	0	0	0	0	0	0	0	4	0	0	0	1	0	0	0	15	0	0	0	0	0	0	0	0	0
Cluster-10.431	0	0	2	0	0	0	0	0	0	0	0	0	0	0	0	0	0	0	0	0	0	0	0	0	0	0	0	0	32	0	0	0	0	0	0	0	1	0	0	0	0	0	0	0
Cluster-10.432	0	0	0	0	0	0	0	0	0	8	1	0	0	0	0	0	0	0	0	0	0	0	0	0	0	0	0	0	0	0	0	0	0	0	0	0	0	0	0	0	0	0	0	0
Cluster-10.433	0	0	0	0	6	0	0	0	0	0	0	0	0	0	0	8	0	0	0	0	0	0	0	0	0	0	0	0	0	0	0	16	0	0	0	0	0	0	0	5	0	0	0	0
Cluster-10.434	0	1	250	0	0	0	0	0	30	4	0	0	0	9	19	0	5	0	0	0	1	0	0	17	9	2	0	0	0	1	0	0	0	25	0	0	0	0	8	0	3	0	0	0
Cluster-10.435	0	29	0	0	0	0	0	0	4	0	1	0	243	0	0	0	0	0	7	0	0	0	0	0	116	148	1	11	0	1	5	18	0	0	0	0	27	0	0	0	1	9	0	0
Cluster-10.436	9	1	0	5	10	4	5	4	1	7	11	0	2	6	4	24	8	0	0	0	2	17	1	0	299	0	0	0	0	1	0	0	17	9	0	0	0	0	0	0	0	10	24	5
Cluster-10.437	1	0	280	2	1	0	1	0	37	8	7	0	0	24	16	8	4	0	0	0	3	4	1	34	28	2	2	10	0	3	2	1	0	33	0	0	0	0	15	0	11	1	0	1
Cluster-10.438	1	0	12	3	53	3	21	4	0	263	104	0	6	1	10	32	7	19	5	0	3	38	8	22	38	10	5	49	3	105	0	98	0	21	21	1	24	0	0	1	2	11	3	7
Cluster-10.439	0	0	1	0	0	0	0	0	0	0	0	0	0	0	0	0	0	1	0	0	0	0	0	0	6	0	0	0	1	0	0	0	0	0	0	0	0	0	3	3	0	0	0	0
Cluster-10.440	0	0	0	0	0	0	0	0	0	1	0	0	0	0	0	0	0	1	0	0	0	0	0	0	14	1	4	3	0	11678	1	2	1	1	2	0	0	398	1	0	0	0	159	0
Cluster-10.441	0	0	0	0	0	0	0	0	0	3	0	0	0	82	0	0	0	0	0	0	0	0	0	0	0	0	0	0	0	0	0	0	0	0	0	0	0	0	0	0	0	0	0	0
Cluster-10.442	0	0	0	1	0	31	0	0	0	0	0	0	316	0	0	0	0	0	0	0	0	0	0	0	2	4	0	0	0	2	0	5	0	0	17	0	200	2	0	62	0	0	0	0
Cluster-10.443	0	0	0	0	0	1	0	0	2	0	1	0	33	1	0	43	0	331	0	0	461	0	5	811	183	0	1	0	1027	1	0	280	2	658	0	0	469	2	249	2	0	448	0	0
Cluster-10.444	0	0	0	0	0	0	0	0	113	0	0	0	0	0	0	0	0	2	0	0	0	0	0	0	0	0	4	1	0	0	2	0	0	0	0	14	0	0	0	0	0	0	0	0
Cluster-10.445	0	0	0	1	0	0	0	0	0	0	0	0	0	1	0	0	0	0	37	0	0	126	0	0	0	0	1	66	0	1	128	0	0	0	0	0	0	0	0	0	0	0	0	0
Cluster-10.446	0	0	0	83	0	0	0	0	0	0	0	0	0	0	0	0	0	0	79	0	0	519	0	0	0	131	6	12	0	0	10	0	0	0	874	0	0	0	0	3	0	0	0	1
Cluster-10.447	3	0	1	11	65	1064	129	47	28	0	2	0	26	255	0	4	10	151	6	0	33	71	2	41	148	1	22	56	61	1958	31	120	0	101	132	29	31	13	62	27	66	105	1	0
Cluster-10.448	0	0	1	0	0	0	0	0	0	0	0	0	0	4	0	0	0	0	0	0	0	0	13	0	0	0	14	70	0	0	121	0	0	0	0	0	0	0	0	0	0	0	0	0
Cluster-10.449	0	0	0	0	0	0	0	0	0	11	0	0	0	0	0	0	0	0	0	0	0	0	0	0	0	0	1	0	0	0	0	0	0	0	0	0	0	0	0	0	0	0	0	0
Cluster-10.450	0	0	21	0	0	0	0	0	0	0	0	0	0	0	20	0	0	0	0	0	0	0	0	0	0	0	2	9	0	0	17	0	0	0	0	0	0	1	0	0	0	0	0	0
Cluster-10.451	0	0	0	0	1	0	0	0	14	0	0	0	0	0	0	0	3	0	0	0	0	0	0	0	0	0	0	0	0	0	0	0	0	0	0	0	0	0	0	2	0	0	0	0
Cluster-10.452	6	0	0	0	15	0	4	2	8	0	0	0	0	8	0	0	0	0	4	0	0	4	0	0	0	6	247	312	1	14	848	2	0	0	9	0	0	1373	0	0	118	0	0	0
Cluster-10.453	0	0	0	0	0	0	0	0	0	106	0	0	0	0	0	0	0	0	0	0	0	0	0	0	0	0	0	0	1	7	0	0	0	0	0	0	0	0	0	0	0	0	0	0
Cluster-10.454	0	0	0	0	0	0	0	0	0	11	0	0	0	0	0	0	0	0	0	0	0	0	0	0	0	0	1	3	0	0	0	0	0	0	0	0	0	0	0	0	0	0	0	0
Cluster-10.455	0	0	0	0	0	0	0	0	1	0	0	0	0	0	0	0	0	0	0	0	0	0	0	0	0	3	0	1	0	8139	0	1	0	1	0	0	0	1	0	2	7	0	0	0
Cluster-10.456	0	0	4	0	0	0	0	0	1	0	1	0	0	101	1	0	0	0	1	0	21	0	418	0	0	0	0	0	0	0	2	0	0	0	421	0	0	2	0	0	1	0	0	0
Cluster-10.457	0	0	0	0	0	0	0	0	0	0	0	0	0	0	0	0	0	0	0	0	0	0	0	0	0	0	221	298	0	0	123	0	0	0	0	219	0	0	0	0	0	0	0	0
Cluster-10.458	0	0	0	0	0	0	76	0	0	0	0	0	0	0	0	0	1	0	0	0	5	0	0	0	0	0	2	0	0	4	0	0	4	0	0	0	2	0	7	0	0	0	0	0
Cluster-10.459	1	0	0	1	0	0	204	0	0	0	1	0	0	14	0	1	1	0	1	0	0	0	0	0	1524	2	59	1484	1	3	250	0	0	0	0	12	0	0	0	0	0	8	1	1
Cluster-10.460	0	0	0	0	0	0	0	0	0	0	0	0	0	0	0	0	47	0	0	0	0	0	0	0	0	0	4	4	343	1	7	0	0	0	0	0	0	62	0	0	1	0	0	0
Cluster-10.461	17	0	1	20	33	10	6	5	4	8	40	0	1	18	15	42	12	0	2	0	3	24	9	1	2563	0	0	0	0	6	0	2	34	15	36	0	0	698	0	0	1	21	45	7
Cluster-10.462	0	0	0	0	0	0	0	0	1	181	0	0	0	0	0	0	0	0	0	0	0	0	0	0	1	0	0	1	0	0	0	0	0	0	1	1	5	0	0	0	0	0	0	0
Cluster-10.463	0	0	36	2	0	0	0	0	0	0	0	0	0	691	25	0	0	1	0	0	0	23	36	0	0	2	0	0	0	0	0	0	0	0	0	0	0	0	0	37	0	0	0	0
Cluster-10.464	0	1	0	0	1	3	7	0	3	2	0	0	0	0	0	0	0	0	0	0	0	0	2	0	0	1	4	8	0	488	0	3	0	0	0	0	8	1	0	2	0	0	0	0
Cluster-10.465	0	0	0	0	0	20	394	0	0	0	0	0	0	0	0	0	0	0	0	0	0	0	0	0	0	0	4	3	1	9647	8	2	1	0	371	0	1	1	0	0	12	0	0	0
Cluster-10.466	0	0	0	0	0	0	0	0	0	0	0	0	0	0	0	0	0	5	0	0	0	0	0	0	0	11	0	0	3	0	0	0	0	0	11	0	0	0	0	0	27	0	0	0
Cluster-10.467	0	0	0	0	0	0	0	0	3	0	22	0	1	0	0	0	0	0	2	0	0	0	1	0	1	2	1	3	0	271	1	0	0	0	0	0	7	2	0	1	1	0	0	1
Cluster-10.468	0	0	22	0	1	4	0	1	1	1	0	0	0	0	13	0	0	0	0	0	0	0	3	0	0	6	204	5295	19	14	889	1	3	0	1	0	1	5	1	0	8	1455	0	0
Cluster-10.469	0	0	0	0	0	19	588	0	0	0	0	0	0	0	0	0	0	0	2	0	0	0	0	0	0	4	2	0	0	18672	1	0	4	0	690	1	0	0	0	2	1	0	0	0
Cluster-10.470	0	0	0	0	0	4	161	0	0	0	0	0	0	0	0	0	0	0	0	0	0	0	0	0	0	0	1	0	0	5592	1	0	0	1	87	1	0	0	0	0	1	0	0	0
Cluster-10.471	0	0	2	1	0	0	1	0	86	0	1	0	421	1	2	2	0	12	328	0	1688	0	0	658	0	1	45	386	265	0	194	99	0	1312	1	0	208	0	1882	0	2	2	1	0
Cluster-10.472	0	0	0	0	0	0	0	0	0	0	0	0	0	0	0	0	0	0	0	0	0	0	0	0	0	0	0	0	0	0	0	0	0	0	0	0	0	0	0	8	0	0	0	0
Cluster-10.473	0	0	0	0	0	0	0	1	0	1	2	0	0	0	0	0	0	0	1	0	0	0	0	0	0	0	0	0	0	0	2	0	1	0	0	0	0	0	0	0	9	0	0	0
Cluster-10.474	4508	0	0	0	1	21	0	33	1	0	57	0	0	250	2	0	0	0	2	0	2	0	0	0	10	0	2	1	0	4	0	3	0	0	0	11	0	0	0	6	259	0	0	9
Cluster-10.475	0	0	0	0	0	0	0	7	0	0	0	0	0	0	0	0	0	0	0	0	0	0	0	0	1	0	0	0	0	0	0	4	0	0	0	0	0	0	0	0	0	0	0	0
Cluster-10.476	0	0	0	0	0	0	0	4	0	0	0	0	0	0	0	0	0	0	0	0	0	0	0	0	0	3410	8	17	2	52	1	3	0	2	0	0	0	2	5	1	10	0	0	0
Cluster-10.477	0	0	0	0	15	0	0	0	0	0	0	0	8	0	0	0	0	0	0	0	0	0	0	0	0	0	0	0	0	0	0	0	0	0	0	0	61	0	0	0	0	0	0	0
Cluster-10.478	0	0	0	0	0	2	0	17	0	0	0	0	0	0	0	2	0	0	0	0	0	0	0	2	0	0	0	0	0	4	0	3	0	22	0	0	0	0	16	1	0	0	0	0
Cluster-10.479	0	0	1	0	0	5	0	0	0	0	13	0	1	0	0	0	4	28	0	0	0	1	0	1	0	5	5272	2748	4	119	5850	3	0	2	1	0	0	9	2	1	10	0	0	0
Cluster-10.480	0	0	0	0	0	0	0	1	2	17	0	0	0	0	0	0	0	0	0	0	0	0	0	0	365	1	0	2	6	3	1	0	0	0	0	0	0	0	0	3	0	1	0	0
Cluster-10.481	0	0	0	0	0	0	0	1392	0	0	0	0	0	0	0	0	0	0	0	0	3	0	0	0	0	0	2	1	0	0	0	0	0	0	0	0	0	1	2	0	0	0	0	0
Cluster-10.482	0	0	0	0	3	0	0	1	1	0	0	0	12	0	0	0	0	0	0	0	0	0	18	0	0	0	12	23	0	0	5	0	0	0	0	5	42	7	1	5	0	0	0	0
Cluster-10.483	0	0	0	0	0	0	0	0	0	0	8	0	3	0	0	5	0	1174	6	0	0	2	0	0	0	1	0	0	445	6	0	88	0	9	4205	0	0	0	32	3	0	0	0	0
Cluster-10.484	0	0	0	0	0	0	0	0	0	0	0	0	0	0	0	1	0	0	0	0	0	0	2	0	0	0	0	5	0	0	0	31	0	0	0	0	0	0	0	1	0	0	0	0
Cluster-10.485	0	0	14	1	112	9	40	12	1	257	195	0	19	3	20	6	5	32	17	0	8	5	24	29	3	45	40	133	12	328	12	11	0	29	41	0	96	2	1	29	8	18	2	10
Cluster-10.486	0	0	0	3	0	0	0	1	0	0	0	0	0	0	0	0	0	0	0	0	0	11	0	0	112	0	0	0	0	6	0	2	0	0	0	0	0	0	0	0	0	0	0	0
Cluster-10.487	0	0	0	0	0	0	0	394	0	0	2	0	0	0	2	0	0	0	0	0	0	0	0	0	0	0	0	0	1	1	0	0	0	0	0	0	0	0	0	0	0	0	0	0
Cluster-10.488	0	0	0	0	0	0	0	0	8	0	0	0	0	0	0	0	5	0	0	0	0	0	0	0	0	0	0	0	0	1	0	0	0	0	0	0	0	1	0	2	0	0	0	0
Cluster-10.489	0	0	0	0	0	0	0	0	0	0	0	0	0	0	0	0	0	0	0	0	1	0	0	0	0	0	1	0	1	0	0	0	0	2	0	0	6	0	7	0	0	0	0	0
Cluster-10.490	1	0	0	0	0	0	1	598	0	0	0	0	0	0	0	0	1	30	0	0	0	0	0	0	0	14	0	0	0	1	0	0	0	0	0	604	0	0	0	0	270	2	0	0
Cluster-10.491	0	0	0	0	0	0	0	0	0	0	0	0	0	0	0	0	0	0	0	0	0	0	0	2	0	0	0	0	0	0	1	0	0	9	0	0	2	0	6	0	0	11	0	0
Cluster-10.492	0	0	0	0	2	0	102	0	0	0	50	0	0	6	0	0	0	1	34	0	0	0	0	0	0	0	0	0	4	0	0	0	0	0	0	0	0	0	0	0	0	0	0	11
Cluster-10.493	0	0	0	0	0	0	107	25	0	0	1	0	0	0	0	0	0	0	0	0	0	0	0	0	0	0	0	0	0	0	0	0	4	0	0	28	0	0	1	0	24	0	0	0
Cluster-10.494	0	0	0	0	0	0	0	0	0	0	0	0	6	0	0	0	0	7	0	0	7	0	0	1	0	0	0	0	1	8	0	0	0	8	0	7	3	1	8	1	0	0	0	0
Cluster-10.495	0	2	0	0	0	0	0	0	0	0	3	0	22	0	0	0	0	0	1	0	128	1	0	66	0	1	2	6	18	7	0	1	0	71	1	0	18	0	129	0	0	0	0	0
Cluster-10.496	0	0	0	0	0	0	1	0	0	0	0	0	0	0	0	0	0	12	0	0	0	0	0	0	0	0	3	10	0	0	1	0	0	0	0	0	0	0	0	0	50	0	0	0
Cluster-10.497	0	0	0	0	2	0	0	0	0	0	0	0	0	0	0	0	0	0	0	0	0	0	2	0	0	0	15	23	0	0	5	59	0	0	0	0	7	1	0	1	0	0	0	0
Cluster-10.498	0	0	0	0	8	0	535	0	1	0	7	0	0	28	0	0	0	0	60	0	4	0	4	0	908	11	51	1104	1	4	175	112	0	2	0	21	1	0	2	0	0	4	0	4
Cluster-10.499	0	0	0	0	0	0	26	0	0	2	0	0	0	2	0	0	0	0	0	0	0	0	0	0	2	0	0	0	13	1457	0	0	0	0	0	0	0	0	0	0	1	0	0	0
Cluster-10.500	0	0	0	1	0	0	4	0	0	0	0	0	0	1	0	0	0	0	0	0	0	2	0	0	0	0	0	2	0	88	3	0	0	0	0	0	0	0	0	0	0	0	0	0
Cluster-10.501	0	0	0	0	0	0	532	0	0	0	0	0	0	0	0	0	0	0	2	0	0	0	0	0	0	0	0	1	0	0	0	0	3	0	0	0	0	0	0	0	0	0	0	0
Cluster-10.502	0	0	0	0	0	3	1	0	0	0	1	0	3	2	0	0	0	0	0	0	3	0	0	3	10	0	1	3	0	39	1	2	0	7	13	0	10	1	4	1	20	0	0	0
Cluster-10.503	0	0	0	0	1	0	0	0	0	0	0	0	0	0	0	0	0	1	518	0	0	0	0	0	0	1	1	0	0	4	0	0	0	0	0	5	1	0	0	0	0	0	0	0
Cluster-10.504	0	0	0	0	0	1	334	0	0	0	0	0	1	4	0	0	0	0	1	0	5	0	0	0	0	0	0	0	444	0	0	0	17	0	0	0	1	1	2	0	0	0	2	0
Cluster-10.505	0	0	0	1	0	0	0	0	0	302	0	0	0	0	0	0	0	0	0	0	0	2	0	0	0	0	0	1	0	906	1	1	0	3	0	0	2	0	0	0	0	0	0	0
Cluster-10.506	0	0	0	0	0	0	0	0	0	0	0	0	0	0	0	0	0	0	0	0	0	0	0	0	0	63	0	0	0	0	0	0	0	0	0	0	0	0	0	0	0	0	0	0
Cluster-10.507	0	0	0	0	0	0	1	0	0	0	0	0	0	0	0	0	0	19	0	0	0	0	0	0	3	0	9	14	0	0	0	2	0	0	0	0	0	0	0	0	89	0	0	0
Cluster-10.508	0	0	0	0	0	0	0	473	0	0	0	0	2	0	0	0	0	0	0	0	0	0	1	4	0	38	0	0	0	3	0	0	0	6	1	0	11	0	2	0	0	0	0	0
Cluster-10.509	0	1	11	0	971	2	0	6	1	1	2	0	1	1	5	0	0	6	3	0	2	0	0	2	13	1	3	9	3	40	6	7	1	3	0	0	11	1	2	5	21	1	0	0
Cluster-10.510	0	0	0	0	157	0	0	0	0	0	0	0	0	0	0	0	0	0	0	0	0	0	0	0	0	0	0	0	0	2	0	0	0	0	0	0	0	1	1	0	0	0	0	0
Cluster-10.511	0	0	0	0	0	0	1	16	0	0	3	0	1	0	0	1	0	1	2	0	1	0	0	5	2	15	0	3	0	14	0	0	0	6	0	0	4	0	1	1	61	0	0	0
Cluster-10.512	0	0	0	0	0	0	0	0	1	0	1	0	0	0	0	0	0	0	0	0	0	0	0	0	0	1	0	0	0	5344	0	1	0	0	0	0	1	0	1	0	0	0	0	0
Cluster-10.513	0	0	0	0	0	1	0	0	0	0	0	0	0	1	0	0	0	0	0	0	0	0	0	0	0	0	1	0	164	2745	0	0	1	0	0	0	0	1	0	0	0	2	0	0
Cluster-10.514	0	0	0	285	1	0	0	0	0	0	1	0	0	2	0	1	1	0	0	0	0	16	0	0	2	0	0	0	1	42	0	0	0	0	0	0	0	0	0	0	0	0	0	1
Cluster-10.515	0	0	0	0	0	0	5	0	0	0	0	0	0	0	0	0	0	11	0	0	0	0	0	0	0	0	6	10	0	0	2	0	0	0	0	0	0	0	0	0	78	0	0	0
Cluster-10.516	0	0	0	0	0	0	0	0	0	0	0	0	0	0	0	0	0	0	0	0	0	0	0	0	0	0	101	987	0	1	164	0	0	0	1	0	0	0	0	0	458	0	0	0
Cluster-10.517	0	0	0	0	0	0	40	0	0	0	0	0	0	3	0	0	0	0	0	0	0	0	0	0	0	0	0	0	496	0	0	0	3	0	0	0	0	2	0	0	0	0	0	0
Cluster-10.518	0	0	0	0	0	0	0	0	0	0	13	0	0	0	0	0	0	0	0	0	0	0	0	0	0	0	0	0	0	0	0	0	2	0	0	0	0	0	0	0	0	0	0	0
Cluster-10.519	0	0	99	0	4	0	0	0	13	0	0	0	0	0	51	0	0	0	0	0	0	0	45	0	0	0	0	0	0	0	0	0	0	0	0	0	0	0	0	0	0	0	0	0
Cluster-10.520	0	0	0	0	0	0	0	0	0	0	0	0	0	0	0	0	0	0	0	0	0	0	0	0	0	0	0	0	178	2877	1	0	1	0	1	0	0	0	0	1	1	0	0	0
Cluster-10.521	0	0	0	0	0	0	0	0	0	0	0	0	0	0	0	0	0	0	0	0	0	0	0	0	0	0	1	0	0	6867	0	0	0	0	1	1	0	0	1	1	2	0	0	0
Cluster-10.522	0	0	0	0	0	0	0	0	0	0	0	0	0	0	0	0	0	0	0	0	0	0	0	0	0	12	0	0	0	0	0	0	0	0	0	0	0	0	0	0	0	0	0	0
Cluster-10.523	0	0	38	0	0	0	0	0	2	0	0	0	0	0	12	0	6	0	0	0	0	0	1	0	0	0	0	0	0	0	0	13	0	0	0	0	0	0	0	125	0	0	0	0
Cluster-10.524	0	0	0	0	0	0	0	0	0	0	0	0	0	0	0	0	44	0	0	0	0	0	0	0	0	4	0	0	0	0	0	0	0	0	94	0	0	0	0	0	0	0	0	0
Cluster-10.525	0	0	0	0	0	0	20	0	0	0	0	0	0	0	0	0	0	0	0	0	0	0	0	0	0	0	0	0	0	0	0	0	0	0	0	0	0	0	0	0	0	0	0	0
Cluster-10.526	0	0	0	0	0	0	0	0	0	0	1	0	0	73	0	0	0	0	0	0	0	0	0	0	0	1	0	0	0	0	0	0	0	0	0	0	0	0	0	0	0	0	0	0
Cluster-10.527	0	0	0	0	0	0	5	0	0	0	0	0	42	0	0	0	0	0	0	0	173	0	0	280	0	0	0	1	2	0	0	0	0	344	3	0	101	0	112	0	0	77	0	0
Cluster-10.528	0	0	0	0	0	0	0	0	0	0	0	1	0	0	0	0	0	0	0	0	0	0	0	0	456	0	0	0	0	0	0	0	0	0	0	0	0	0	0	0	0	0	0	0
Cluster-10.529	0	0	0	0	0	0	1	0	0	0	0	0	0	0	0	0	25	0	0	0	0	0	0	0	0	0	0	0	0	0	0	0	0	0	0	0	0	0	0	0	0	0	0	0
Cluster-10.530	2	0	0	1	0	0	704	0	0	0	4	0	0	0	0	0	1	0	0	0	0	0	29	0	1	3	1	0	1	14229	0	3	6	0	0	0	1	0	1	0	3	0	1	0
Cluster-10.531	0	0	0	0	0	0	0	0	0	0	0	0	0	0	0	0	0	0	0	0	16	0	0	0	0	0	10	78	0	0	115	0	0	0	0	0	0	0	0	0	0	0	0	0
Cluster-10.532	0	0	0	0	0	0	0	0	0	0	0	0	0	9	0	0	0	0	0	0	0	0	0	0	0	2	1	3	0	10278	0	0	0	0	0	2	1	1	1	3	106	0	0	0
Cluster-10.533	0	0	0	0	0	0	266	0	0	1	0	0	0	4937	0	0	0	2	0	0	3	0	0	5	0	1	0	0	0	2	0	0	7	14	0	2	0	5	16	0	0	14	0	0
Cluster-10.534	0	0	0	0	0	0	0	0	0	0	0	0	0	1	0	2	0	0	0	0	11	0	662	0	2	0	1	1	0	5	0	33	0	0	0	0	0	0	0	0	0	0	0	1
Cluster-10.535	0	0	0	2	0	0	1	0	0	0	1	0	0	0	0	0	0	0	833	0	0	0	0	0	0	101	0	0	0	0	0	1	0	0	0	0	0	0	0	0	0	0	0	208
Cluster-10.536	0	0	0	0	0	0	0	0	0	0	0	0	0	0	0	0	0	0	0	0	0	0	0	0	0	0	0	0	28	0	0	0	0	0	0	0	0	0	0	0	0	0	0	0
Cluster-10.537	0	0	0	0	0	0	0	0	0	0	0	0	0	0	0	0	0	0	0	0	14	0	0	0	0	1	14	80	8	19	171	0	0	0	0	0	0	0	0	0	1	0	0	0
Cluster-10.538	0	0	0	0	0	0	1	0	0	0	1641	0	0	1	0	0	0	0	2	0	0	0	0	0	0	1	0	0	0	11	0	2	0	2	0	0	2	0	1	0	0	0	0	0
Cluster-10.539	0	0	0	1	0	0	1	0	0	0	0	0	27	0	0	0	0	0	0	0	6	0	6	18	0	0	0	0	17	0	0	0	0	40	0	0	39	0	31	4	0	4	0	0
Cluster-10.540	0	0	0	0	0	0	0	0	0	0	0	0	0	0	0	0	0	0	0	0	0	0	0	0	2	1	0	0	0	0	0	0	0	0	0	0	0	0	0	0	100	0	0	0
Cluster-10.541	0	0	0	25	0	0	0	0	0	0	0	0	0	0	0	0	0	0	1	0	0	6	0	0	0	1	1	0	0	0	0	0	0	0	0	0	0	0	0	0	0	0	0	0
Cluster-10.542	0	0	0	0	0	0	8	0	0	0	0	0	39	0	0	0	0	0	0	0	51	0	0	45	0	0	0	0	0	0	0	1	0	90	4	0	7	0	153	1	0	12	0	0
Cluster-10.543	0	0	35	0	0	9	0	0	0	0	0	0	0	0	5	0	0	0	0	0	0	0	0	0	0	1	0	0	0	2	0	0	0	0	11	4	0	0	0	0	0	0	0	0
Cluster-10.544	0	0	48	0	0	0	0	0	0	0	0	0	0	0	43	0	0	0	0	0	0	0	0	0	0	4	0	0	1	0	0	0	0	0	1	0	0	0	0	0	0	0	0	0
Cluster-10.545	0	0	50	0	0	0	0	0	0	0	0	0	0	0	44	0	0	0	0	0	0	0	0	0	0	0	0	0	0	0	0	0	0	0	2	0	0	0	0	0	0	0	0	0
Cluster-10.546	0	0	0	0	0	0	0	0	0	0	0	0	0	0	0	0	0	3	0	0	0	0	0	0	0	0	41	12	0	0	1	0	0	0	0	0	0	0	0	0	39	0	0	0
Cluster-10.547	0	0	0	1	23	21	50	45	12	0	0	0	6	50	0	2	6	60	0	0	29	68	0	18	25	1	10	15	20	2770	6	37	1	32	28	1	5	0	7	18	5	8	0	0
Cluster-10.548	0	0	0	0	0	20	2	0	0	0	0	0	2	5360	0	0	2	2	0	0	66	0	458	0	0	1	0	4	0	0	3	1	0	0	0	0	0	0	0	0	0	894	0	0
Cluster-10.549	0	0	0	0	0	0	2	0	0	0	0	0	0	0	0	0	0	21	0	0	0	0	0	0	0	0	26	70	0	0	4	0	0	0	0	0	0	0	0	0	115	1	0	0
Cluster-10.550	0	0	0	0	0	0	0	0	0	0	0	0	0	0	0	0	0	0	1	0	0	0	0	0	0	0	0	0	2	1	0	0	0	0	97	1	0	21	0	0	10	9	0	0
Cluster-10.551	0	0	0	0	0	0	0	0	0	0	0	0	0	0	0	0	7	0	0	0	0	0	0	0	0	0	305	433	0	0	157	0	0	0	4	229	0	1	0	0	0	0	0	0
Cluster-10.552	0	0	0	77	0	0	57	0	0	0	3	0	0	0	0	0	0	0	0	0	0	102	0	0	0	0	0	0	0	0	0	1	0	1	0	0	0	0	0	0	0	0	0	0
Cluster-10.553	0	0	0	0	0	0	0	0	0	0	0	0	1	0	0	0	0	0	0	0	0	0	0	0	0	1	0	5	0	9664	0	0	0	1	1	2	3	0	0	2	144	0	0	0
Cluster-10.554	0	0	0	0	0	0	3	0	1	0	4	0	0	5	0	0	0	0	39	0	0	0	0	0	0	0	0	1	0	1	2	0	4	0	0	0	0	0	0	0	0	0	0	15
Cluster-10.555	0	0	2	0	383	0	0	0	2	0	0	0	0	0	2	0	0	0	1	0	0	0	0	0	0	0	0	3	1	1	1	0	0	0	0	0	0	0	0	1	0	0	0	0
Cluster-10.556	0	0	0	0	0	0	0	7	0	0	1	0	0	1	2	0	0	0	51	0	0	0	0	0	8	1	0	6	0	0	4	2	2	0	0	0	0	0	0	0	27	0	0	9
Cluster-10.557	0	0	0	0	0	0	0	0	0	0	0	0	0	0	0	0	0	0	0	0	0	0	0	0	25	0	0	0	0	0	0	0	0	0	0	0	0	0	0	0	0	0	0	0
Cluster-10.558	0	0	0	0	0	0	0	0	0	0	0	0	0	0	0	0	0	0	0	0	0	0	0	0	152	0	0	0	601	0	0	0	0	0	0	0	0	0	0	0	0	0	0	0
Cluster-10.559	0	0	0	0	0	0	0	0	0	0	0	0	2	293	0	2	0	0	1	0	0	0	0	0	0	0	0	0	0	2	0	0	0	0	0	0	0	0	0	0	0	0	0	0
Cluster-10.560	0	0	0	0	0	0	0	0	0	0	0	0	0	0	0	0	0	0	0	0	0	0	0	0	0	9	0	0	0	1339	0	0	0	0	0	0	0	0	0	0	0	0	0	0
Cluster-10.561	0	0	0	0	0	0	0	0	0	7	0	0	0	0	0	0	0	0	0	0	0	0	0	0	0	0	0	0	0	4	0	0	0	0	0	0	0	0	0	0	0	0	0	0
Cluster-10.562	0	0	0	0	0	0	0	0	0	0	0	0	0	0	0	0	0	0	0	0	0	0	0	0	2	21	0	0	0	0	0	0	0	0	0	0	0	0	0	0	0	0	0	0
Cluster-10.563	0	0	0	0	0	0	0	0	0	0	0	0	0	0	0	0	0	0	0	0	0	0	0	0	50	0	0	0	0	0	0	0	0	0	0	0	0	0	0	0	2	0	0	0
Cluster-10.564	0	0	0	0	0	0	0	0	0	0	0	0	0	0	0	0	0	0	0	0	0	0	0	0	1	0	0	0	0	2	0	0	0	0	523	0	0	0	0	0	0	0	0	137
Cluster-10.565	0	0	0	0	0	0	0	0	0	0	9	0	0	4	0	0	0	0	0	0	1	0	0	0	21	0	0	0	0	0	0	0	1	0	0	0	0	0	0	0	0	0	0	0
Cluster-10.566	0	0	0	0	0	0	0	0	0	0	0	0	0	0	0	0	0	0	0	0	1	0	0	0	0	10	0	0	0	0	0	0	0	0	0	3	0	0	0	0	0	0	0	0
Cluster-10.567	1	0	0	0	0	0	0	0	0	0	0	0	0	0	0	0	0	0	0	0	0	0	0	0	98	0	0	0	0	0	0	0	0	0	0	0	0	0	0	0	0	0	0	0
Cluster-10.568	0	0	5	0	0	0	4	2	0	0	0	0	2	0	2	0	0	1	0	0	0	0	0	0	0	0	0	0	11	929	0	0	0	7	1	0	2	0	25	1	0	2	0	0
Cluster-10.569	1	0	0	0	0	0	0	0	0	0	0	0	0	0	0	0	9	0	0	0	0	0	0	0	0	12	0	0	0	0	0	0	0	1	0	0	0	0	0	3	0	0	0	0
Cluster-10.570	0	0	75	0	0	8	0	0	0	0	0	0	0	0	7	0	0	0	0	0	0	0	0	0	0	0	0	0	0	0	0	0	0	0	3	12	0	0	0	0	0	0	0	0
Cluster-10.571	0	0	0	0	0	1	0	0	0	0	0	0	0	0	1	0	0	0	0	0	0	0	0	0	0	15	0	1	0	5193	0	0	0	0	9	0	9	0	0	1	0	0	0	0
Cluster-10.572	0	0	0	0	0	0	0	0	0	0	0	0	0	0	0	0	0	0	0	0	0	0	0	0	0	204	0	0	0	0	0	0	0	0	214	0	0	6	0	0	1	0	0	0
Cluster-10.573	0	0	0	0	0	0	4	0	0	0	0	0	0	0	0	0	0	0	0	0	0	0	0	0	0	0	0	0	0	0	0	0	0	0	0	0	0	39	0	0	0	0	0	0
Cluster-10.574	0	0	0	0	0	0	0	0	0	0	1557	0	0	0	0	0	0	0	0	0	0	0	0	0	0	0	0	1	0	3	0	0	0	1	0	0	0	0	1	0	0	0	0	257
Cluster-10.575	0	0	0	0	0	0	0	0	0	62	0	0	0	4	0	0	0	0	0	0	0	0	0	0	0	28	0	0	4	0	0	0	0	0	0	0	0	0	0	0	0	0	0	0
Cluster-10.576	0	0	0	0	4	0	0	0	0	0	0	0	0	0	0	15	0	0	0	0	0	0	0	0	0	1	0	1	0	0	0	101	0	0	0	0	0	0	0	178	0	0	0	0
Cluster-10.577	1	0	0	0	0	0	0	0	0	0	0	0	0	0	0	0	220	0	0	0	4	1	0	5	0	0	364	520	26	1	175	0	0	0	0	0	5	0	2	0	0	0	0	0
Cluster-10.578	0	0	0	0	0	0	0	0	0	0	0	0	0	0	0	0	0	0	0	0	0	0	0	0	2	0	0	0	0	0	0	0	0	0	0	0	0	0	0	136	0	0	0	0
Cluster-10.579	0	0	0	0	0	0	2	0	0	0	0	0	0	0	0	0	0	1	0	0	0	0	0	0	1	0	19	5	0	8	0	0	0	0	0	0	0	0	0	0	21	0	0	0
Cluster-10.580	0	0	0	0	0	0	0	0	0	0	0	0	0	0	0	0	0	0	0	0	0	0	14	0	1	1	0	0	0	19	0	0	0	0	0	9	0	0	0	0	0	0	0	0
Cluster-10.581	0	0	0	0	0	0	2	0	0	0	11	0	0	11	5	0	0	0	4	0	0	0	0	0	26	0	0	0	0	0	2	0	10	0	0	0	0	0	0	0	0	0	0	0
Cluster-10.582	0	0	1	0	0	0	1	0	0	0	569	0	0	0	0	0	0	15	0	0	0	0	0	0	0	0	29	608	0	56	13	0	0	0	0	0	0	0	0	0	1	0	0	0
Cluster-10.583	1	3	204	1	1	1	0	0	63	0	53	0	0	0	361	12	0	1	1408	0	0	0	0	0	0	2	0	0	0	0	1	983	1	1	0	0	2	0	0	1	469	0	0	0
Cluster-10.584	0	0	0	0	1	0	0	0	0	0	0	0	0	16	0	0	0	0	0	0	0	0	0	0	0	0	0	0	0	0	0	0	0	0	0	0	0	28	0	0	0	0	0	0
Cluster-10.585	0	0	0	0	0	1	0	0	0	0	0	0	0	0	0	0	0	0	0	0	0	0	8	0	1	4	0	0	0	21	3	0	0	0	0	0	0	0	0	0	0	0	0	0
Cluster-10.586	0	0	0	0	0	0	0	0	0	0	0	0	0	0	0	0	38	0	0	0	0	0	0	0	0	0	0	0	0	0	0	0	0	0	0	0	0	0	0	0	0	0	0	0
Cluster-10.587	0	0	0	0	0	0	0	0	0	0	0	0	1	0	0	0	0	1	0	0	14	0	0	0	0	1	0	0	21	0	0	0	0	18	0	6	7	0	25	0	0	4	0	0
Cluster-10.588	0	0	0	0	0	1	0	0	0	0	0	0	4	0	0	0	0	0	6	0	12	0	0	5	35	0	0	0	0	0	0	0	0	5	10	0	33	3	1	0	16	1	0	0
Cluster-10.589	0	0	0	0	0	1548	0	0	0	0	0	0	0	24	0	0	0	0	0	0	0	0	1	0	0	0	0	0	0	0	0	0	0	0	0	0	0	0	0	0	0	6	0	0
Cluster-10.590	0	0	0	0	0	0	0	0	0	0	0	0	0	0	0	0	0	0	0	0	0	0	0	0	175	1	0	0	0	0	0	0	0	0	3	0	0	1	0	0	0	0	0	0
Cluster-10.591	0	0	0	0	0	0	0	0	0	0	0	0	0	0	0	0	0	0	0	0	0	0	0	0	1	0	82	116	0	0	448	0	0	0	0	0	0	9	0	0	47	0	0	0
Cluster-10.592	0	0	0	0	0	0	0	0	0	0	0	0	0	0	0	0	0	0	0	0	0	0	0	0	41	0	0	0	731	0	0	0	0	0	0	0	0	0	0	0	0	0	0	0
Cluster-10.593	5	3	106	0	137	7	146	2	1	0	218	0	94	23	55	9	28	22	139	0	30	1	33	24	0	14	156	418	196	27	17	57	0	365	281	0	59	4	8	25	0	4	0	86
Cluster-10.594	0	0	0	0	0	0	0	0	0	0	0	0	0	0	0	0	2	0	1	0	0	0	6	0	0	0	0	0	0	3	0	0	0	0	0	0	0	0	0	0	2	0	0	0
Cluster-10.595	0	0	0	0	0	0	0	0	0	0	0	0	0	0	0	2	0	0	20	0	0	0	0	0	0	0	0	0	0	0	0	8	1	0	0	0	0	0	0	0	0	0	0	0
Cluster-10.596	0	0	0	0	0	0	0	0	0	574	0	0	0	0	0	0	0	0	0	0	0	0	0	0	0	0	0	0	0	6	0	0	0	0	0	0	0	0	0	0	0	0	0	0
Cluster-10.597	0	0	1	0	17	1	0	0	3	0	0	0	3	9	2	0	0	0	0	0	445	0	0	1207	0	0	0	1	34	4	0	6	0	1584	16	5	1	5	808	4	0	1941	0	0
Cluster-10.598	0	0	0	0	0	0	0	0	0	0	0	0	0	0	0	0	0	0	0	0	0	0	30	0	48	0	0	0	0	0	0	0	0	0	0	0	0	0	0	0	0	5	0	0
Cluster-10.599	0	0	297	0	0	1	1	0	0	0	1379	0	0	0	507	0	1	0	0	0	0	0	0	0	0	0	0	0	8	0	0	0	0	0	0	0	0	0	0	0	0	0	0	0
Cluster-10.600	10	0	1	5	0	0	43	0	0	0	512	0	1	16	3	43	0	0	3820	0	1	4	0	0	0	0	1	2	2	130	7	6581	5	4	1	0	0	0	1	1	1	0	0	1079
Cluster-10.601	1	0	0	0	0	0	0	0	0	0	0	0	2	0	0	0	0	0	4	0	4	0	0	0	25	0	0	0	0	0	0	0	0	1	8	0	23	6	0	0	6	1	0	0
Cluster-10.602	0	0	1	0	0	0	0	0	0	0	0	0	0	437	0	1	0	1	0	0	0	0	16	0	0	1	0	0	106	0	0	83	0	0	0	7	0	3	0	0	0	0	0	0
Cluster-10.603	0	0	0	1	0	0	0	0	0	0	0	0	0	0	0	0	0	0	0	0	0	11	0	0	0	10	0	0	0	625	1	0	0	0	0	1	0	0	0	0	0	0	0	0
Cluster-10.604	0	0	0	0	0	0	0	0	0	0	0	0	0	0	0	0	0	0	0	0	0	0	0	0	0	3	0	0	0	414	0	0	0	0	0	0	0	0	0	0	0	0	0	0
Cluster-10.605	0	0	0	0	0	2	2	0	0	0	1	0	0	0	0	0	0	3	5	0	1	0	0	2	25	0	0	0	0	0	0	0	3	1	7	0	4	1	0	5	5	0	0	0
Cluster-10.606	0	0	0	7	0	0	0	0	0	0	0	0	0	0	0	0	0	0	0	0	0	77	0	0	0	0	0	0	0	10	0	0	0	0	0	0	0	0	0	0	0	0	0	0
Cluster-10.607	0	0	0	0	0	0	0	0	0	0	0	0	0	0	0	0	0	0	0	0	0	0	0	0	426	0	1	0	0	0	0	0	0	0	0	0	0	0	0	0	0	0	0	0
Cluster-10.608	0	0	0	3	0	0	0	0	0	0	0	0	0	0	0	0	0	0	0	0	0	54	0	0	0	70	11	0	0	2142	0	0	0	0	0	0	0	0	0	0	0	0	0	0
Cluster-10.609	16	0	0	0	0	1	0	1	0	3	0	0	399	0	0	0	0	0	0	0	0	0	0	0	0	0	0	0	0	0	1	0	0	0	0	7	28	11	0	0	2298	0	0	0
Cluster-10.610	0	0	0	0	0	0	0	0	0	24	0	0	0	0	0	0	0	0	0	0	1	0	0	0	0	2	0	0	0	0	0	0	0	0	0	0	0	0	0	0	0	0	0	0
Cluster-10.611	0	0	0	0	0	7	0	1	0	0	0	0	0	0	0	0	117	0	0	0	0	0	1	0	0	0	0	0	4	0	0	0	0	0	0	0	0	0	0	22	0	44	0	134
Cluster-10.612	88	1	2	79	184	47	259	42	8	58	178	3	7	99	59	162	33	6	5	0	13	130	34	1	1124	0	83	1268	4	9	198	7	139	56	0	2	2	2	0	0	0	110	215	32
Cluster-10.613	0	0	0	0	0	0	1	0	0	0	0	0	0	0	0	0	0	0	0	0	0	0	0	0	0	2	0	1	1	4	0	0	0	0	0	0	1	0	0	0	221	0	0	0
Cluster-10.614	0	0	0	0	0	0	0	0	0	0	0	0	0	0	0	0	0	0	0	0	7	2	0	0	0	7	0	0	0	0	0	2	0	0	0	0	0	0	0	0	0	0	0	0
Cluster-10.615	0	0	23	0	0	0	0	54	1	0	0	0	0	0	8	0	6	0	0	0	0	0	0	0	0	0	0	0	1	1	0	137	0	0	0	0	1	0	0	1662	0	0	0	0
Cluster-10.616	0	0	0	11	0	0	0	0	0	0	0	0	1	0	0	0	0	1	0	0	0	51	0	28	0	0	2	0	0	312	0	0	1	398	0	156	4	0	396	0	0	51	0	0
Cluster-10.617	0	0	24	2	1	0	1	0	3	0	1	0	57	1	8	1	0	0	0	0	181	1	18	148	0	11	1	1	0	1	2	0	2	633	0	1	0	0	359	0	0	1	1	0
Cluster-10.618	1	0	1	0	0	3	3	1	0	1	0	0	5	0	0	0	2	0	0	0	3	0	0	0	8	0	0	2	0	27	1	0	2	14	3	2	2	0	2	0	0	1	0	0
Cluster-10.619	3	0	0	1	0	0	0	0	0	0	14	0	0	0	0	0	1	0	94	0	3	1	0	0	58	0	0	3	0	2	4	2	1	0	1	0	0	0	0	0	0	1	0	12
Cluster-10.620	0	0	27	26	1	4	3	0	0	0	0	0	0	0	6	0	0	12	2	0	0	38	0	0	0	131	1	23	0	2959	2	19	0	0	5	0	0	1	0	3	4	6	0	3
Cluster-10.621	2	0	0	0	0	0	0	0	0	0	0	0	0	0	0	0	0	0	0	0	18	0	0	0	0	0	0	0	0	0	0	0	0	2	0	0	0	0	0	0	0	0	0	0
Cluster-10.622	0	0	0	0	167	0	0	0	0	0	0	0	12	0	0	0	0	0	0	0	18	0	0	0	0	0	916	3187	0	8	535	1	0	0	0	1	139	1	0	0	576	0	0	0
Cluster-10.623	0	0	0	0	0	0	0	0	0	0	0	0	0	0	0	0	0	0	0	0	282	0	0	0	0	0	0	0	0	601	0	0	0	0	0	0	0	0	0	0	0	0	0	0
Cluster-10.624	0	0	0	0	0	0	0	0	0	0	0	0	0	0	0	0	0	0	1	0	0	0	0	0	0	0	0	0	0	2	0	0	0	0	34	0	0	0	0	0	0	0	0	0
Cluster-10.625	256	0	0	2	0	19	1	3	1	0	81	0	0	0	0	0	0	0	0	0	0	2	0	0	582	1	0	1	1	0	5	0	0	0	0	1	0	1	0	0	11	0	0	6
Cluster-10.626	0	0	2	0	0	3	0	0	0	0	1	0	0	0	0	0	0	0	0	0	0	0	0	0	1	0	0	0	0	7	0	0	0	0	0	0	1	0	0	34	0	0	0	0
Cluster-10.627	3	0	34	0	0	14	8	5	9	0	20	0	30	4	19	1	4	12	30	0	6	0	0	10	132	6	13	51	5	852	39	21	4	24	0	3	44	8	28	11	19	2	0	0
Cluster-10.628	0	0	1	0	0	21	0	0	0	0	0	0	0	41	1	0	0	0	6	0	0	0	0	3	1	2	1	1	1	8	0	1	0	3	0	0	0	0	8	0	1	0	0	0
Cluster-10.629	0	0	0	0	0	11	0	0	0	0	0	0	0	0	0	0	12	0	0	0	0	0	0	0	1	0	0	0	13	2	0	2	0	3	1	0	2	0	3	0	0	0	0	0
Cluster-10.630	0	0	0	0	0	14	0	0	0	0	0	0	0	0	0	0	24	0	0	0	0	0	0	0	0	0	0	0	0	0	0	0	0	0	0	0	0	0	0	0	0	0	0	0
Cluster-10.631	0	0	0	0	0	4	0	0	0	0	0	0	0	0	0	0	7	0	0	0	0	0	0	0	0	0	0	0	0	0	0	0	0	0	0	0	0	0	0	0	0	0	0	0
Cluster-10.632	0	0	0	0	0	0	0	0	0	0	9	0	0	0	0	0	0	0	6	0	0	0	0	0	0	0	0	0	0	0	0	0	0	0	0	0	0	0	0	0	0	0	0	4
Cluster-10.633	0	0	0	2	0	0	0	0	0	0	12	0	0	0	0	1	0	0	19	0	0	1	0	0	1	1	0	2	1	0	6	0	1	0	0	0	0	0	0	0	0	0	0	0
Cluster-10.634	0	0	0	0	0	3	0	1	0	0	0	0	0	106	0	0	0	0	0	0	0	0	0	0	1	0	1	1	0	2	0	3	0	0	1	26	0	0	0	0	43	0	0	0
Cluster-10.635	0	0	0	3	0	0	26	1	0	1	1	0	4	2	0	10	1	1	2381	0	2	0	0	3	4	0	0	33	7	1	2	1929	2	7	3	1	3	0	6	0	1	2	0	1
Cluster-10.636	0	0	0	0	0	11	0	0	0	0	0	0	0	0	0	0	40	0	0	0	0	0	0	0	0	0	0	0	0	0	0	0	0	0	0	0	0	0	0	0	0	0	0	0
Cluster-10.637	0	0	0	0	0	21	0	0	0	0	0	0	0	0	0	0	9	0	0	0	0	0	0	0	0	0	0	0	0	1	0	0	0	0	0	0	0	0	0	0	0	0	0	0
Cluster-10.638	0	0	0	0	0	0	0	0	0	0	0	0	9	0	0	0	0	0	5	0	4	0	0	2	18	0	0	0	0	129	0	0	0	5	3	0	22	0	2	14	2	1	0	0
Cluster-10.639	0	0	0	0	0	0	0	0	0	0	21	0	0	0	0	0	0	0	8	0	0	0	0	0	0	0	0	0	0	0	0	0	0	0	0	0	0	0	0	0	0	0	0	6
Cluster-10.640	0	0	33	0	0	5	0	0	0	0	47	0	0	0	8	0	0	0	20	0	0	0	0	0	0	0	0	0	0	0	0	0	0	0	7	0	0	0	0	0	0	0	0	13
Cluster-10.641	2	0	18	0	0	1	1	0	2	0	86	0	1	5	1	0	1	4	5	0	2	0	0	1	10	2	2	21	1	39	7	1	0	4	0	0	6	0	0	3	5	0	0	0
Cluster-10.642	172	1	363	0	20	17	7	25	8	127	1017	0	27	27	207	2	3	6	111	0	11	1	165	9	26	1	5	21	26	85	17	88	0	22	119	0	14	104	15	12	0	9	20	269
Cluster-10.643	0	0	2	0	0	0	1	6	0	0	0	0	0	0	0	0	0	0	1	0	0	0	0	0	3	0	0	3	1	16	0	0	0	2	0	0	2	0	2	37	0	0	0	0
Cluster-10.644	0	0	0	0	0	0	0	0	0	0	40	0	0	1	0	0	0	0	27	0	0	0	0	0	0	0	0	0	0	0	0	0	0	0	0	0	0	0	0	0	0	0	0	6
Cluster-10.645	1	0	4	0	0	0	5	0	0	0	94	0	1	0	3	0	0	0	67	0	0	0	0	0	1	2	0	1	0	0	0	0	0	4	1	0	2	1	1	0	0	0	0	1
Cluster-10.646	0	0	0	0	0	0	0	0	0	0	10	0	0	0	0	0	0	0	11	0	0	0	0	0	0	0	0	0	0	0	0	0	0	0	0	0	0	0	0	0	0	0	0	8
Cluster-10.647	0	0	4	0	0	0	0	0	1	0	0	0	0	1	0	0	0	0	1	0	0	0	0	0	0	0	0	0	0	0	0	0	0	0	0	0	0	0	13	0	0	0	0	0
Cluster-10.648	0	0	0	0	0	0	0	0	0	0	0	0	0	0	0	0	0	0	25	0	0	0	0	0	0	0	0	0	0	1	0	0	0	0	0	0	0	0	0	0	0	0	0	41
Cluster-10.649	0	0	0	0	0	0	0	0	0	0	0	0	0	0	0	0	0	0	255	0	0	0	0	0	0	0	0	0	0	0	0	0	0	0	0	0	0	0	0	0	0	0	0	0
Cluster-10.650	0	0	0	0	0	0	0	0	0	0	2	0	0	0	0	0	0	0	24	0	0	0	0	0	0	0	0	0	0	1	0	0	0	0	0	0	0	0	0	0	0	0	0	8
Cluster-10.651	0	0	0	0	0	0	0	0	0	0	11	0	0	0	0	0	0	0	3	0	0	0	0	0	0	0	0	0	0	0	0	0	0	0	0	0	0	0	0	0	0	0	0	2
Cluster-10.652	0	9	0	0	4	0	0	0	0	0	1	0	190	4	0	0	0	0	0	0	0	0	0	0	12	34	0	0	0	1768	0	1	0	0	0	0	19	0	0	0	0	0	0	0
Cluster-10.653	0	0	0	0	0	30	222	0	0	0	0	0	0	1	0	0	0	0	1	0	0	0	0	0	0	0	0	0	57	104	0	3	9	0	0	0	0	45	1	0	0	20	0	0
Cluster-10.654	0	0	4	0	5	0	20	0	0	0	68	0	0	0	0	17	0	0	311	0	1	12	10	0	1	0	4	0	0	0	4	336	0	1	0	0	0	4	1	0	0	1	0	78
Cluster-10.655	0	0	0	0	0	0	0	0	0	0	8	0	0	0	0	0	0	0	36	0	0	0	0	0	24	1	0	0	8	952	0	0	0	0	0	0	0	0	0	0	0	0	0	0
Cluster-10.656	0	0	0	0	0	0	0	0	0	0	1	0	0	0	0	0	0	0	23	0	0	0	0	0	364	0	0	0	101	197	0	0	0	0	0	0	0	0	0	0	0	0	0	1
Cluster-10.657	1	0	0	2	0	0	0	0	0	0	1	0	0	0	0	2	0	0	2026	0	0	0	1	1	0	0	0	0	2	4	0	287	0	0	0	0	0	0	0	0	0	1	0	856
Cluster-10.658	0	0	0	0	0	0	0	0	0	0	0	0	0	187	0	0	0	0	4	0	0	0	0	0	0	0	0	0	2	0	0	0	0	0	1	0	0	0	0	0	0	0	0	1
Cluster-10.659	0	0	0	0	0	1	1	103	1	0	0	0	0	0	0	0	0	1	0	0	0	0	0	0	0	1	5	10	3	17	1	0	0	0	1	58	0	0	0	3	80	0	0	0
Cluster-10.660	0	0	25	4	20	13	20	4	3	30	41	0	7	6	5	5	8	14	15	0	2	16	13	19	39	61	165	103	162	586	56	26	0	26	183	857	43	13	63	40	478	8	22	1
Cluster-10.661	0	0	0	0	0	26	0	0	0	0	0	0	0	0	1	0	0	0	9	0	0	0	0	0	1	0	1	0	0	9	0	0	0	0	0	0	1	0	1	26	0	0	0	0
Cluster-10.662	0	0	0	0	0	0	0	0	0	0	0	0	0	0	0	0	0	0	368	0	0	0	0	0	0	0	0	0	0	93	0	0	0	0	0	0	0	0	0	0	0	0	0	0
Cluster-10.663	0	0	0	1	0	0	0	0	0	0	191	0	0	0	0	0	0	0	705	0	0	0	0	0	5	0	0	0	3	58	0	0	0	0	0	0	0	3	0	0	0	0	0	20
Cluster-10.664	32	1	337	24	132	12	5	8	2	17	966	0	1	20	80	38	10	0	0	0	3	30	4	1	30	0	1	3	28	4	1	1	44	14	0	0	1	1	0	3	0	27	72	70
Cluster-10.665	0	0	0	0	0	0	0	0	0	0	0	0	0	0	0	0	0	0	199	0	0	0	0	0	0	0	0	0	0	0	0	0	0	0	0	0	0	0	0	2	0	0	0	0
Cluster-10.666	104	0	4	53	6	74	325	18	4	2	29	0	8	21	2	0	2	739	56	0	5	163	116	6	1	2	8	9	9	3162	1	47	0	12	39	1	7	53	8	79	7	6	19	1
Cluster-10.667	0	0	0	0	0	0	0	0	0	0	0	0	0	0	0	0	0	0	40	0	0	0	0	0	0	64	51	53	0	0	106	0	0	0	0	0	0	0	0	0	0	0	0	1
Cluster-10.668	0	0	0	0	0	0	0	0	0	0	0	0	1	0	0	0	1	0	0	0	4	0	0	1	0	0	0	0	0	0	0	0	0	14	0	0	0	0	2	0	0	0	0	0
Cluster-10.669	0	0	3	0	0	0	0	0	0	0	0	0	0	0	16	0	0	0	1	0	0	0	0	0	1	0	0	0	0	0	0	0	0	0	0	0	0	0	0	0	0	0	0	0
Cluster-10.670	1	0	0	0	0	162	66	0	0	6	0	0	0	0	0	0	0	0	0	0	0	0	0	0	601	51	0	0	203	0	0	0	0	0	0	530	1	0	0	0	0	0	0	0
Cluster-10.671	0	0	6	0	2	0	5	1	0	0	11	0	1	2	0	2	1	14	7	0	4	0	2	1	0	8	19	98	8	16	4	9	0	4	9	0	2	0	2	5	21	0	0	1
Cluster-10.672	0	1	86	0	0	0	0	0	0	0	0	0	0	0	99	0	0	0	0	0	1	0	0	3	0	0	1	1	7	0	0	0	0	8	0	0	8	0	18	0	0	10	0	0
Cluster-10.673	0	1	100	0	399	0	0	1	0	1	1	1	0	0	39	0	0	0	1	0	0	0	0	0	0	0	0	1	0	10009	0	0	0	0	1	37	1	2	0	2	192	0	91	1
Cluster-10.674	0	0	0	0	0	0	14	0	0	0	1	0	0	42	0	0	0	7	3	0	0	0	0	0	8	0	0	2	0	1	4	0	25	0	0	0	0	0	0	0	0	0	0	3
Cluster-10.675	0	0	0	0	0	1	514	0	0	51	0	0	0	0	0	0	0	0	1	0	0	0	0	0	0	1	0	0	0	1	0	0	27	0	0	0	0	0	0	0	0	0	0	0
Cluster-10.676	0	0	0	0	0	0	0	0	0	0	0	0	0	0	0	0	0	0	225	0	0	0	0	0	0	0	0	0	0	4	0	0	0	1	0	0	0	0	0	0	0	0	0	0
Cluster-10.677	0	0	0	2	0	1	0	0	1	0	0	0	0	0	41	0	0	4	55	0	0	1	1	0	7	3	0	1	0	4	1	2	0	0	1	0	0	0	0	0	0	0	0	1
Cluster-10.678	0	0	0	0	0	0	0	3	0	0	0	0	0	0	0	0	0	0	0	0	1	0	0	0	0	0	0	0	0	0	0	0	0	0	0	0	0	0	0	145	0	0	0	0
Cluster-10.679	0	0	0	1	0	0	1	0	0	0	0	0	0	0	0	0	0	0	1879	0	2	0	0	0	0	0	0	0	0	0	0	0	0	0	0	0	0	0	0	0	0	0	0	0
Cluster-10.680	0	0	24	0	12	2	12	1	0	0	34	0	7	5	2	3	0	16	13	0	15	0	4	6	0	11	11	52	20	0	5	39	0	5	31	0	10	3	2	25	0	1	0	6
Cluster-10.681	0	0	0	0	1	0	0	0	0	0	185	0	1	0	0	0	0	113	1	0	0	0	0	3	29	2	3	6	1	33	0	1	0	0	0	0	5	0	1	4	7	0	0	23
Cluster-10.682	0	0	0	0	0	1	9	3	2	0	60	0	11	6	0	0	0	9	25	0	6	0	0	19	44	15	10	50	7	317	3	5	0	21	0	0	27	0	4	28	23	2	1	0
Cluster-10.683	0	0	0	0	0	0	0	0	0	0	0	0	0	0	0	0	0	0	99	0	0	0	0	0	0	31	0	0	0	0	0	0	0	0	0	0	0	0	0	0	0	0	0	33
Cluster-10.684	0	0	0	0	9	0	0	0	0	0	0	0	1	0	0	0	0	0	0	0	0	0	0	0	0	1	0	0	0	3496	0	0	0	0	1	0	2	0	1	0	2	0	0	0
Cluster-10.685	0	0	0	0	3	0	0	0	0	0	0	0	0	0	0	0	0	0	0	0	0	0	0	0	0	0	0	0	0	0	0	0	0	0	0	0	0	0	0	207	0	0	0	0
Cluster-10.686	0	0	0	0	0	0	0	0	0	0	0	0	0	0	0	0	17	1	0	0	0	0	0	0	0	0	0	0	0	0	0	0	0	0	0	0	0	0	0	17	0	0	0	0
Cluster-10.687	0	0	0	0	0	0	0	0	0	0	0	0	0	0	0	0	0	0	0	0	0	0	0	0	0	0	0	0	0	113	0	0	0	0	0	0	0	0	0	0	0	0	0	0
Cluster-10.688	0	10	0	0	0	0	0	0	0	0	0	0	0	0	0	0	0	30	0	0	0	0	0	0	0	0	0	0	0	0	0	0	0	0	0	0	0	0	0	0	0	0	0	0
Cluster-10.689	0	0	0	0	0	0	0	0	0	0	0	0	0	0	0	0	0	149	0	0	0	0	0	0	1	0	0	0	0	492	0	0	0	0	0	0	0	1	0	0	0	0	0	0
Cluster-10.690	0	0	0	0	0	1	0	0	0	0	0	0	3	2	0	64	0	0	0	0	617	0	0	898	83	0	3	1	1069	23	0	321	0	738	0	0	505	6	311	3	2	579	1	0
Cluster-10.691	0	0	0	0	150	0	0	9	0	0	0	0	0	0	0	0	0	0	0	0	0	0	0	0	0	0	0	0	0	1	0	0	0	0	0	0	0	0	0	0	0	0	0	0
Cluster-10.692	0	0	0	0	1	0	0	0	0	0	0	0	0	0	0	0	0	0	0	0	0	0	0	0	0	0	0	0	0	0	0	0	0	0	0	0	0	14	0	0	0	0	0	0
Cluster-10.693	0	0	0	0	0	0	0	0	0	0	126	0	0	0	0	0	0	1	0	0	0	0	0	0	0	0	0	0	0	0	0	0	0	0	0	0	0	0	0	0	0	0	0	0
Cluster-10.694	413	0	165	22	0	9	87	1	0	117	483	0	1	1	83	0	0	94	61	0	0	64	414	1	0	2	0	1	1	991	0	1	0	0	2	1	0	49	0	23	0	2	30	104
Cluster-10.695	0	0	0	0	4	0	0	0	0	0	0	0	0	0	0	0	0	0	0	0	0	0	0	0	0	0	0	0	0	0	0	0	0	0	0	0	0	0	0	68	0	0	0	0
Cluster-10.696	0	0	0	0	4	0	0	0	0	0	0	1	0	0	0	0	0	6	2	0	0	0	0	0	2	0	0	0	0	0	0	0	0	0	1	0	0	0	0	0	0	0	0	0
Cluster-10.697	0	0	0	0	0	0	0	1	0	0	2	0	0	0	1	0	0	1	0	0	0	0	0	0	4	2	0	0	0	0	1	0	0	0	0	0	0	0	0	0	27	0	0	0
Cluster-10.698	0	0	0	0	460	0	0	0	0	0	0	0	125	0	0	0	0	0	0	0	0	0	0	0	0	0	0	0	0	194	0	0	0	0	0	0	40	0	0	0	0	0	0	0
Cluster-10.699	0	0	0	0	2	0	0	0	0	0	0	0	0	0	0	0	0	1	0	0	0	0	1	0	0	0	1	0	110	2	0	0	0	0	0	0	0	0	0	0	0	0	0	0
Cluster-10.700	0	0	0	0	7	0	0	0	0	0	0	0	0	1	0	0	1	0	0	0	0	0	0	0	0	0	0	0	0	0	0	0	0	0	0	0	7	0	0	0	0	0	0	0
Cluster-10.701	0	0	0	0	0	0	3	0	0	0	0	0	0	0	0	0	0	16	0	0	0	0	0	0	0	1	156	102	0	0	4	0	0	0	0	0	0	0	0	0	151	0	0	0
Cluster-10.702	0	0	292	0	1	0	0	0	7	0	5	0	2	0	116	4	0	0	0	0	1	0	1	5	0	0	0	0	3	0	1	86	0	6	0	0	4	0	10	0	0	1	0	0
Cluster-10.703	0	0	0	0	0	0	1	0	0	0	0	0	0	0	0	0	0	1	0	0	0	0	0	0	0	1	1	2	0	7	0	1	0	1	6379	0	1	1	0	2	2	0	0	0
Cluster-10.704	0	0	0	0	5	0	0	0	0	0	0	0	0	0	0	0	0	0	0	0	0	0	0	0	0	1	1	0	0	3366	0	0	1	0	0	0	1	0	0	0	9	0	3	0
Cluster-10.705	0	0	5	0	0	0	0	0	0	0	0	0	0	0	41	0	0	0	0	0	0	0	0	0	0	0	0	0	0	0	0	0	0	0	0	0	0	0	0	0	0	0	0	0
Cluster-10.706	0	0	0	0	0	0	0	0	0	0	0	0	1	0	0	0	0	506	1	0	0	0	0	0	0	0	0	0	0	103	0	0	0	0	0	0	4	0	0	0	1	1	0	0
Cluster-10.707	1	0	0	0	0	0	0	0	0	0	0	0	0	0	0	0	0	54	0	0	0	0	0	0	0	20	0	0	0	29	0	0	0	0	0	334	1	0	0	0	0	0	0	0
Cluster-10.708	2	0	0	0	0	0	0	312	0	0	0	0	0	0	0	0	0	115	1	0	0	0	0	0	0	37	0	0	0	0	0	0	0	0	0	704	0	0	0	0	0	0	0	1
Cluster-10.709	0	0	0	0	0	0	0	0	0	0	0	0	0	0	0	0	0	666	0	0	0	0	0	0	0	0	0	0	0	5	0	0	0	0	0	0	0	0	0	1	0	0	0	0
Cluster-10.710	0	0	0	1	0	0	0	1	0	0	5	0	1	0	0	3	0	1	0	0	3	0	4	10	0	1	0	1	1	21	1	2	0	12	0	0	8	0	1	0	0	1	0	1
Cluster-10.711	0	0	0	1	2	0	0	0	0	3	1	0	0	0	0	0	0	1	436	0	0	0	0	0	0	0	0	0	1	19	0	0	0	0	0	0	0	0	0	0	1	0	1	564
Cluster-10.712	1	0	0	1	6	2	0	0	0	1	19	0	1	1	3	8	22	114	1	0	0	2	62	0	0	0	0	1	0	0	0	2	2	2	0	0	0	0	0	1	0	4	3	2
Cluster-10.713	0	0	0	0	0	0	0	0	0	0	95	0	0	0	0	1	0	0	475	0	0	0	0	0	0	0	0	0	0	0	0	120	0	0	0	0	0	0	0	0	28	0	0	18
Cluster-10.714	0	0	1	0	0	1	0	44	7	0	0	0	0	0	0	0	0	0	1	0	0	0	0	0	2	0	0	2	0	11	1	0	0	0	1	0	2	0	0	0	2	0	0	0
Cluster-10.715	0	0	0	0	0	0	0	0	0	0	0	0	0	0	0	0	0	0	0	0	0	0	0	0	0	0	1	1	0	1073	0	0	0	0	0	0	0	0	0	0	0	0	0	0
Cluster-10.716	0	0	25	0	0	1	30	0	0	0	2	0	0	0	7	0	0	0	1	0	0	2	0	0	128	3	48	116	1	0	80	0	0	0	16	0	0	1	0	0	1	36	0	0
Cluster-10.717	0	0	0	0	261	0	4	0	0	0	0	0	0	1	0	0	2	70	0	0	6	1	2	0	0	0	5	33	314	0	41	0	0	0	0	0	0	0	0	1	0	0	0	1
Cluster-10.718	0	0	1	0	0	0	1	2	0	0	4	0	2	0	2	0	0	2	3	0	0	0	0	1	4	4	2	4	2	64	3	5	0	3	0	0	5	0	1	3	2	0	0	0
Cluster-10.719	0	0	1	2	2	0	0	0	1	0	0	0	0	0	38	0	0	21	24	0	0	0	0	0	0	0	0	0	0	4	1	0	0	0	0	0	0	0	0	0	0	0	0	0
Cluster-10.720	0	0	0	0	287	0	0	0	0	0	0	0	0	0	0	0	0	57	0	0	0	0	19	0	0	0	0	0	21	0	0	0	0	0	0	0	0	0	0	2	0	4	0	0
Cluster-10.721	0	0	0	0	0	162	0	199	0	0	3	0	0	0	0	0	307	0	1	0	0	0	0	0	0	0	0	0	1488	0	0	1	1	0	10	0	0	0	1	0	3	0	0	0
Cluster-10.722	22	0	1	80	63	16	10	9	1	8	41	0	1	18	50	47	11	810	2	0	2	58	118	3	19	0	572	825	0	8	1	1	36	5	38	0	0	173	0	0	552	27	33	5
Cluster-10.723	0	0	0	5	0	0	0	0	0	0	0	0	0	0	0	0	1	0	0	0	0	53	0	0	0	0	0	1	0	0	0	0	0	0	0	0	0	0	0	0	0	0	0	1
Cluster-10.724	1	0	0	0	0	0	0	0	0	0	0	0	0	0	0	0	37	12	0	0	0	0	0	7	3	0	0	0	0	0	0	0	0	0	0	0	2	0	0	3	0	0	0	0
Cluster-10.725	0	0	0	0	3	0	0	0	0	0	0	0	4	0	0	0	0	7	0	0	0	0	0	5	3	2	0	2	649	0	6	0	0	14	15	0	7	0	40	0	18	0	1	0
Cluster-10.726	0	0	0	0	0	17	1	2	0	0	0	0	1	0	0	0	566	407	0	0	0	0	1	0	0	0	0	0	14	5	2	0	1	0	0	0	1	0	1	18	0	158	0	27
Cluster-10.727	0	0	0	0	0	0	0	0	0	0	0	0	0	0	0	0	31	9	0	0	0	0	0	0	0	0	0	0	0	1	0	0	0	0	0	0	0	0	0	64	0	0	0	0
Cluster-10.728	0	0	0	0	0	0	0	0	0	0	0	0	0	0	0	0	2	0	0	0	0	0	0	0	0	0	0	0	0	0	0	0	0	0	16	0	0	0	0	0	0	0	0	0
Cluster-10.729	3796	0	1	0	0	0	0	0	0	0	0	1	0	0	0	0	0	0	0	0	0	0	0	0	0	0	1	0	0	26	4	0	0	0	0	0	0	8	0	0	0	0	0	0
Cluster-10.730	0	0	0	0	0	20	0	32	0	0	0	0	0	0	0	0	45	0	0	0	0	0	0	0	0	0	0	0	392	0	0	0	0	0	0	0	0	0	0	0	1	0	0	0
Cluster-10.731	405	1	30	282	718	195	132	162	33	249	695	0	36	438	190	749	196	11	28	0	62	573	130	12	385	0	335	459	2	25	86	18	511	133	1	2	34	0	3	0	0	390	1003	175
Cluster-10.732	0	0	31	0	0	0	11	0	2342	0	0	1	0	0	22	0	0	11	0	0	0	0	2	0	0	0	10	5	6	0	10	0	0	0	0	0	0	10	0	0	4	0	0	1
Cluster-10.733	2	0	0	0	3	1	0	0	0	1	1	0	0	2	0	4	2	0	0	0	0	1	0	0	1	3	1	2	0	6282	0	0	4	0	0	0	1	2	0	0	0	1	1	0
Cluster-10.734	0	0	0	0	0	0	0	0	0	0	0	0	0	0	0	0	7	20	0	0	0	0	0	0	0	0	0	0	0	0	0	0	0	0	11	0	0	0	0	0	0	0	0	0
Cluster-10.735	0	0	0	0	932	0	0	2	0	0	0	0	0	0	0	0	0	263	0	0	0	0	1	0	0	0	0	0	104	0	0	0	0	0	0	0	0	0	0	1	0	1	0	0
Cluster-10.736	0	0	0	0	28	0	0	224	0	0	2	0	0	0	0	0	0	7	0	0	0	0	0	0	0	0	0	0	5	10	0	0	0	0	0	0	0	0	0	0	0	0	0	0
Cluster-10.737	0	0	0	0	260	0	0	0	0	0	0	0	0	0	0	0	0	0	0	0	0	0	0	0	0	1	324	570	1	0	71	0	0	0	0	0	152	1	0	1	0	0	0	0
Cluster-10.738	0	0	0	0	0	0	0	0	0	0	0	0	0	0	0	0	0	0	0	0	0	0	0	1	0	0	0	0	0	0	0	1	0	0	0	0	1	0	1	139	0	2	0	0
Cluster-10.739	12	0	29	949	22	40	25	4	12	64	21	0	0	40	162	2	29	90	135	1	7	87	62	1	143	74	26	73	3	47	99	2	53	0	19	0	0	4	0	3	17	2	1	8
Cluster-10.740	0	0	0	3	0	0	5	0	0	0	0	0	0	0	0	0	0	0	0	0	0	5	0	0	0	0	0	0	0	0	0	1	0	0	14	0	0	0	0	0	0	0	0	0
Cluster-10.741	0	0	0	1	0	0	0	0	0	0	0	0	0	0	0	0	0	0	0	0	0	0	0	0	20	0	0	0	0	0	0	0	0	0	0	0	0	0	0	0	0	0	0	0
Cluster-10.742	0	0	0	12	0	0	0	0	0	0	0	0	0	0	0	0	0	0	0	0	0	182	0	0	0	0	0	0	0	0	0	0	0	0	0	0	0	0	0	0	0	0	0	0
Cluster-10.743	0	0	0	0	0	17	0	0	0	0	0	0	0	0	0	0	0	0	0	0	0	0	0	0	0	0	6	38	0	0	28	0	0	0	0	0	0	0	0	0	0	0	0	0
Cluster-10.744	0	0	0	0	1	1	0	0	0	0	0	0	1	0	0	0	16	0	0	0	0	0	0	0	0	0	0	0	0	0	0	0	0	0	0	0	0	0	0	1	0	2	0	0
Cluster-10.745	0	0	0	0	0	0	0	0	0	0	0	0	0	0	0	0	50	1	0	0	0	0	0	0	0	0	1	0	2	0	0	0	0	0	140	0	0	0	0	0	0	0	0	0
Cluster-10.746	0	0	0	0	0	0	0	0	0	0	0	0	0	0	0	6	0	0	0	0	0	0	66	0	0	0	0	0	0	0	0	31	0	0	0	0	0	49	0	0	0	0	0	0
Cluster-10.747	0	0	0	0	0	0	440	5	0	0	0	0	7	0	0	0	2	4	0	0	6	0	0	80	0	0	0	0	10	0	0	0	6	122	9	0	14	0	32	0	0	4	0	0
Cluster-10.748	0	0	0	2	0	0	2	0	0	0	1450	0	2	0	0	0	0	0	646	0	0	0	0	0	0	0	0	0	1	0	0	0	0	0	0	0	0	0	0	0	0	0	0	219
Cluster-10.749	0	0	0	1	0	0	3	0	0	0	0	0	0	0	0	0	4	3	0	0	1	3	0	0	0	0	157	1404	0	4	530	0	1	1	20	0	0	0	0	0	355	0	0	0
Cluster-10.750	0	0	0	0	0	0	0	0	0	0	0	0	0	0	0	0	0	0	0	0	0	0	50	0	0	0	0	0	0	0	0	32	0	0	0	0	0	29	0	0	0	0	0	0
Cluster-10.751	0	0	0	2	0	0	0	0	0	0	0	0	0	31	0	0	0	0	0	0	0	0	0	0	0	0	1	0	0	622	0	0	0	0	8	0	0	0	0	0	0	0	0	0
Cluster-10.752	0	2	0	0	0	0	0	0	0	0	0	0	0	194	0	0	0	0	0	0	0	0	0	0	0	0	0	0	0	244	0	0	0	0	2	0	0	0	0	0	0	0	0	0
Cluster-10.753	0	0	0	9	4	0	0	0	0	0	0	0	0	0	0	8	0	0	0	0	0	0	0	0	0	0	0	0	0	0	0	37	0	0	0	0	0	0	0	773	0	1	0	0
Cluster-10.754	0	0	0	1	4546	0	631	0	1	0	0	0	0	1	1	0	0	0	0	0	0	0	0	0	0	0	0	0	0	5	0	0	12	0	0	0	0	0	0	0	0	0	0	0
Cluster-10.755	0	0	0	13	0	0	0	0	0	0	0	0	0	0	0	0	0	0	0	0	0	126	0	0	0	0	0	0	0	0	0	0	0	0	7	0	0	0	0	0	0	0	0	0
Cluster-10.756	0	0	2	91	40	2	0	0	0	10	0	0	32	0	115	0	0	2022	0	0	0	188	321	0	0	4	87	144	9	1	0	0	0	0	4	3	11	27	0	0	92	10	0	0
Cluster-10.757	0	0	102	0	0	3	0	0	0	0	0	0	1	0	8	0	0	0	0	0	0	0	0	0	0	0	0	0	0	1	0	0	0	2	63	7	0	0	0	0	0	0	0	0
Cluster-10.758	0	0	0	0	303	0	768	0	486	216	1	0	338	1	0	0	0	0	1	0	1023	0	0	2319	0	1	0	0	0	0	0	1	27	1389	1	455	398	0	586	159	3258	0	0	0
Cluster-10.759	0	0	0	0	0	0	0	1	0	0	0	0	0	0	0	12	0	0	0	0	0	0	0	0	0	0	0	2	0	2	0	2006	0	0	0	0	0	0	0	45	0	0	0	0
Cluster-10.760	0	0	15	0	0	0	0	0	8	0	0	1	0	0	7	0	0	4	0	0	0	0	4	0	144	0	0	0	0	0	0	0	0	0	0	0	0	0	0	0	0	0	0	0
Cluster-10.761	0	0	0	0	0	0	0	0	0	0	0	0	0	0	0	0	0	0	1	0	9	0	0	12	2	0	0	0	0	0	0	1	0	10	0	0	6	3	4	128	0	4	0	0
Cluster-10.762	0	0	4	0	0	0	0	0	0	2	0	0	0	0	115	0	0	0	0	0	0	0	1	0	0	2	0	1	1	0	0	0	0	0	0	0	0	0	0	0	0	0	0	0
Cluster-10.763	0	0	6	0	0	0	0	0	0	0	0	0	0	0	103	0	0	0	0	0	0	0	0	0	0	0	0	0	0	0	0	0	0	0	0	0	0	0	0	0	0	0	0	0
Cluster-10.764	2	0	4	0	4	6	14	9	2	0	79	0	12	8	0	3	1	6	26	0	9	0	0	4	31	19	12	47	3	373	4	7	0	12	0	0	31	0	1	14	21	0	0	0
Cluster-10.765	0	0	0	4	0	0	0	0	0	0	0	0	0	0	0	0	0	0	0	0	0	9	0	0	0	0	0	0	0	1	0	0	0	0	44	0	0	0	0	0	0	0	0	0
Cluster-10.766	0	0	4	0	0	0	3	0	0	0	0	0	0	0	3	0	0	1	0	0	7	0	0	1	1	2	4	9	8	5819	3	0	0	5	2	0	5	1	8	4	1	1	0	0
Cluster-10.767	0	0	0	0	1	2	0	0	0	0	0	0	0	0	0	0	0	0	0	0	0	0	0	0	0	0	3	1	2	0	0	0	0	0	68	0	10	33	0	3	5	5	0	0
Cluster-10.768	0	1	0	215	0	0	0	0	0	13	0	0	1	0	0	0	1	0	1	0	0	603	0	0	0	0	0	0	0	0	0	0	0	0	1358	0	0	1	0	0	3	0	0	0
Cluster-10.769	0	0	11	0	0	1	340	0	0	0	0	0	1	0	2	0	0	0	0	0	0	0	0	0	302	0	0	0	0	1	0	0	1	0	0	0	0	0	0	0	0	0	0	0
Cluster-10.770	8	0	0	0	0	0	107	0	0	0	0	0	0	0	0	8	0	8	0	0	0	0	58	0	0	0	0	0	0	0	0	51	5	0	0	0	0	0	0	0	0	1	0	0
Cluster-10.771	0	0	0	0	0	0	0	0	0	0	0	0	8	0	0	0	0	0	0	0	0	0	11	0	0	1	0	0	0	0	0	1	0	0	0	0	10	0	0	0	0	0	0	0
Cluster-10.772	0	0	11	0	0	0	0	0	0	0	0	0	0	0	94	0	0	0	2	0	0	0	0	0	0	0	0	0	0	0	0	0	0	0	0	0	0	0	0	0	0	0	0	0
Cluster-10.773	0	0	0	0	0	0	0	0	0	0	0	0	0	0	1	0	494	0	0	0	0	0	0	1	0	0	0	0	0	0	0	0	0	0	0	0	0	0	0	2	0	150	0	0
Cluster-10.774	0	0	0	0	0	0	0	0	0	0	334	0	0	0	1	0	0	0	0	0	0	0	0	0	0	0	0	0	1	0	0	0	0	0	0	0	0	0	0	0	0	0	0	0
Cluster-10.775	0	0	0	106	0	0	0	0	0	0	0	0	0	0	0	0	0	0	0	0	0	135	0	0	0	0	0	0	0	0	0	0	0	0	0	0	0	0	0	0	0	0	0	0
Cluster-10.776	0	0	0	4	23	28	25	32	6	0	0	0	3	186	0	2	5	116	0	0	15	46	0	12	81	2	3	9	12	738	6	24	0	15	24	0	4	0	9	5	7	7	0	0
Cluster-10.777	0	0	0	0	0	0	1	0	0	0	0	0	0	17	0	0	0	0	0	0	2	0	21	1	0	2	4	2	0	6	9	0	0	3	7838	0	1	7	1	0	0	0	0	0
Cluster-10.778	0	0	0	0	0	0	0	0	0	0	0	0	0	0	0	0	0	0	0	0	0	13	0	0	0	0	8	6	0	0	0	0	0	0	0	0	1	0	2	0	4	0	0	0
Cluster-10.779	0	0	0	0	0	0	0	8	0	0	0	0	0	0	0	0	0	0	5	0	0	0	0	0	0	3	0	0	0	0	0	0	0	0	0	0	0	0	0	0	9	0	0	0
Cluster-10.780	0	0	0	0	0	0	28	0	0	0	0	0	0	0	0	11	0	3	0	0	0	0	165	0	0	0	0	0	1	0	0	151	7	0	0	1	0	27	0	0	0	0	0	0
Cluster-10.781	0	0	0	0	0	0	10	0	0	0	1	0	0	0	1	0	0	1	0	0	0	0	18	0	0	0	4	1	2	2	0	14	0	2	0	0	0	0	2	0	1	0	0	0
Cluster-10.782	0	0	0	0	0	0	35	1	0	0	0	0	0	0	0	0	0	0	0	0	0	0	0	0	0	0	0	0	0	1	0	0	0	0	0	0	0	0	0	0	5	0	0	0
Cluster-10.783	0	0	0	0	0	0	0	0	0	0	0	0	0	1	0	0	0	0	0	0	0	0	0	0	0	0	0	1	0	0	0	1	0	0	100	0	0	0	3	0	0	0	0	0
Cluster-10.784	0	0	0	0	0	0	0	0	0	0	0	0	0	0	0	0	0	0	0	0	0	0	0	0	0	0	0	0	0	2	0	0	0	0	0	0	0	0	0	0	0	0	0	252
Cluster-10.785	0	3	0	12	94	43	171	93	37	0	1	0	35	116	1	7	11	298	21	0	83	146	0	60	179	8	26	40	84	545	21	118	0	94	141	2	25	0	40	63	8	41	1	1
Cluster-10.786	43	0	3	18	30	45	407	5	12	2	14	0	9	36	1	0	1	370	9	0	21	95	44	13	3	2	17	27	21	4792	11	22	2	24	32	2	8	14	26	111	15	9	10	0
Cluster-10.787	0	0	0	3	0	0	6	0	0	0	0	0	0	0	0	0	0	2	0	0	0	0	0	0	0	0	0	0	0	0	0	0	0	0	58	0	0	0	0	0	0	0	0	0
Cluster-10.788	0	0	0	0	0	0	0	0	0	11	0	0	0	3	0	0	0	0	0	0	0	0	0	0	0	0	0	0	0	0	0	0	0	0	0	0	0	1	0	0	0	0	0	0
Cluster-10.789	0	0	0	0	0	0	0	0	0	10	0	0	0	0	0	0	0	0	0	0	0	0	0	0	0	1	0	0	0	1	0	0	0	0	0	0	0	0	0	0	0	0	0	0
Cluster-10.790	10	0	19	49	5	16	118	0	3	19	19	0	0	20	166	1	19	75	78	0	5	8	42	0	374	50	69	353	2	51	407	8	221	0	2	13	0	1	0	1	20	0	1	7
Cluster-10.791	0	0	0	0	0	0	0	1	0	0	0	0	0	0	0	0	0	0	25	0	0	0	0	0	0	2	0	0	0	0	0	0	0	0	0	0	0	0	0	0	5	0	0	1
Cluster-10.792	38	1	4	35	63	13	12	11	2	21	1384	0	3	34	21	52	9	1	1144	0	2	50	8	2	40	0	0	0	0	5	0	3	60	11	0	0	0	1	0	0	0	34	71	747
Cluster-10.793	0	0	0	0	0	0	321	0	0	0	0	1	0	0	0	0	27	160	0	0	0	0	1	0	203	0	0	0	4	0	0	0	0	0	0	0	0	0	0	0	0	0	0	0
Cluster-10.794	0	3	0	179	29	0	16	0	0	0	0	0	0	0	0	0	0	0	0	0	1	330	7	0	0	0	0	0	0	0	0	6	0	0	0	0	0	0	0	0	0	0	0	0
Cluster-10.795	0	0	0	10	0	0	6	0	0	0	0	0	4	0	0	0	0	34	0	0	0	0	0	0	0	1	2	1	2	18848	3	0	0	1	4	0	8	1	6	2	4	0	0	0
Cluster-10.796	0	1	6	15	1	1	0	0	0	0	1	0	0	1	46	0	1	27	35	0	0	3	7	0	19	10	1	11	0	81	5	0	3	0	1	0	0	0	0	0	2	0	0	3
Cluster-10.797	0	0	0	0	0	0	0	0	0	0	49	0	0	0	0	0	0	0	0	0	0	0	0	0	0	0	0	0	0	1	0	6	0	0	0	0	0	0	0	0	0	0	0	0
Cluster-10.798	0	5	0	0	0	0	0	0	0	4	0	0	0	0	0	0	0	0	0	0	0	0	3	0	0	0	0	0	0	0	0	11	0	0	0	1	0	0	0	0	0	0	0	0
Cluster-10.799	0	29	0	0	0	0	0	0	0	6	0	0	0	2193	0	1	0	0	0	0	1	0	9	1	0	0	0	4	0	143	0	5	0	0	0	2	0	0	0	0	0	1	0	0
Cluster-10.800	0	0	0	0	0	0	0	0	0	0	0	0	0	10	0	0	0	0	0	0	0	0	0	0	0	0	0	2	0	0	0	0	0	0	0	0	0	0	0	0	1	0	0	0
Cluster-10.801	2	17	0	0	0	0	0	1	0	0	0	0	0	0	0	0	0	0	0	0	0	0	0	0	0	0	0	0	0	2	0	0	0	1	0	1150	0	0	0	0	0	0	0	0
Cluster-10.802	14	0	0	8	1	0	0	0	0	0	25	0	0	1	4	0	0	8	25	0	10	2	1	0	95	0	2	3	2	2	1	0	4	0	3	0	0	0	0	0	1	1	0	3
Cluster-10.803	0	0	0	0	227	0	0	0	0	0	0	0	0	0	0	0	0	0	2	0	0	0	0	0	0	0	0	0	10	272	0	0	0	0	0	3	0	0	0	0	116	0	33	0
Cluster-10.804	0	0	0	0	0	0	20	0	0	0	0	0	0	1	0	0	0	0	0	0	0	1	0	0	0	0	0	0	1	0	0	0	0	0	0	0	0	0	0	0	0	0	0	0
Cluster-10.805	0	0	0	0	0	0	0	4	0	55	0	0	0	3	0	0	0	0	0	0	0	0	0	0	0	20	1	0	0	0	0	0	0	0	0	0	0	0	0	0	0	0	0	0
Cluster-10.806	0	3	0	0	6	0	134	0	0	0	0	0	0	2	0	0	0	3	0	0	2	0	0	10	175	0	0	0	0	0	0	0	0	7	12	0	2	1	9	40	0	4	0	0
Cluster-10.807	0	2	0	0	0	0	0	16	0	292	0	0	0	16	0	0	0	0	0	0	0	0	0	0	0	116	0	0	3	0	0	0	0	0	0	0	0	0	0	0	0	0	0	0
Cluster-10.808	0	0	1	1	0	2	2	0	0	30	0	0	0	1	4	0	1	1	76	0	1	0	2	0	5	6	0	14	0	2	4	1	2	0	0	0	0	0	0	0	0	0	0	12
Cluster-10.809	0	0	0	0	0	0	0	0	0	0	0	0	0	0	0	0	0	0	0	0	0	0	0	0	0	0	0	0	0	1555	0	0	0	0	0	0	0	0	0	1	0	0	0	0
Cluster-10.810	0	0	0	0	0	0	0	0	0	0	1	0	0	1	2	0	0	0	7	0	0	0	0	0	0	0	0	0	0	0	0	0	0	0	0	0	0	0	0	0	4	0	0	2
Cluster-10.811	0	0	0	4	0	2	0	0	0	0	4	0	0	0	0	0	0	0	1	0	0	0	0	0	0	1	0	7	0	0	4	0	0	0	0	0	0	0	0	0	0	0	0	0
Cluster-10.812	0	0	0	0	0	0	0	0	0	0	0	0	0	0	0	0	0	0	0	0	0	0	0	0	0	0	0	1	0	2	0	0	0	0	2757	0	1	1	1	0	0	0	1	0
Cluster-10.813	0	0	0	0	0	0	0	0	0	0	0	0	0	2	0	0	0	0	0	0	0	0	0	0	0	0	2	60	0	0	83	0	0	0	0	0	0	0	0	0	0	18	0	0
Cluster-10.814	4	0	0	0	653	0	360	42	0	0	0	0	39	0	0	0	11	56	0	0	35	0	0	490	0	0	0	2	24	4	0	0	8	953	94	0	58	0	149	1	1	2	0	0
Cluster-10.815	0	0	0	0	0	0	20	0	0	0	0	0	20	0	0	0	0	667	0	0	0	0	0	0	0	0	0	0	0	0	0	0	0	0	11	0	0	0	0	0	1	4	0	0
Cluster-10.816	0	0	0	0	0	0	0	0	0	0	0	0	0	0	0	0	0	0	0	0	0	0	0	0	0	0	1	0	0	3125	0	0	0	0	1	1	2	0	0	0	0	0	0	0
Cluster-10.817	0	0	0	0	0	0	0	0	0	0	0	0	0	1	0	0	0	0	0	0	0	0	0	0	609	0	0	0	0	0	0	0	0	0	0	0	0	0	0	0	0	0	0	0
Cluster-10.818	0	0	0	0	0	0	0	0	0	0	0	0	11	107	0	0	0	1	2	0	0	0	0	1	0	0	1	0	0	0	0	0	0	0	0	174	9	0	1	0	0	0	0	0
Cluster-10.819	0	0	0	0	0	0	0	0	0	0	0	0	0	7	0	0	0	0	0	0	0	0	0	0	0	0	1	17	0	0	0	0	0	0	0	0	0	0	0	1	2	0	0	0
Cluster-10.820	1	0	0	24	0	0	15	0	0	0	0	0	0	0	0	0	0	0	0	0	0	108	0	0	1	0	0	0	0	0	0	0	0	0	0	0	0	0	0	0	0	0	0	0
Cluster-10.821	0	0	0	0	0	0	0	0	0	0	0	0	0	13	0	0	0	0	0	0	1	0	29	0	0	0	0	0	0	0	0	0	0	0	0	0	0	0	0	0	0	0	0	0
Cluster-10.822	0	0	250	0	0	0	0	0	1	0	0	0	0	0	203	0	0	84	1	0	0	0	139	0	2	0	0	0	0	0	0	0	0	0	2	0	0	0	0	1	0	0	0	0
Cluster-10.823	4	0	0	0	0	0	0	0	0	0	0	0	0	520	0	0	0	0	0	0	0	0	0	0	0	0	0	0	15	0	0	2	0	0	0	0	0	0	0	0	0	1	0	0
Cluster-10.824	0	0	0	0	0	0	0	0	0	0	0	0	0	17	0	0	0	0	0	0	4	1	45	0	0	0	2	8	0	0	1	0	0	0	0	0	0	0	0	0	6	0	0	0
Cluster-10.825	0	0	0	0	0	0	0	1	0	0	0	0	0	51	0	0	0	0	0	0	0	0	0	0	0	1	0	0	11	0	0	0	0	1	1	0	0	0	0	1	0	0	0	0
Cluster-10.826	0	1	0	0	0	0	11	0	0	0	26	0	0	0	0	0	0	16	18	0	0	0	0	0	130	0	0	0	0	0	0	0	3	0	0	0	0	0	0	14	0	4	0	13
Cluster-10.827	0	0	0	0	0	0	0	0	0	0	0	0	0	76	0	0	96	0	0	0	2	0	3	0	0	0	0	1	0	0	0	0	0	0	0	0	0	0	0	10	0	14	0	0
Cluster-10.828	0	0	9	134	42	6	0	0	0	15	0	0	29	0	161	0	0	2515	0	0	0	214	347	0	0	2	378	510	11	2	0	1	0	1	5	5	11	127	1	0	307	6	0	0
Cluster-10.829	0	0	0	0	0	1	0	0	0	11	0	0	1	25	0	1	0	0	0	0	0	2	3	0	0	0	2	13	75	99	3	0	0	6	5	0	0	0	2	1	1	0	0	0
Cluster-10.830	0	0	0	0	0	0	0	0	0	0	0	0	2	213	0	0	0	0	0	0	0	0	0	0	0	0	0	0	0	0	0	0	0	0	0	28	11	0	0	0	0	0	0	0
Cluster-10.831	0	0	0	0	0	0	0	0	0	0	0	0	0	7	0	0	0	0	0	0	21	0	0	0	0	0	61	512	0	2	92	0	0	0	0	2	2	0	0	0	242	0	0	0
Cluster-10.832	0	0	0	0	0	0	0	0	0	0	0	0	0	4	0	0	0	0	0	0	0	0	0	0	0	0	0	0	1097	2	0	0	0	0	0	0	0	0	0	0	0	0	0	0
Cluster-10.833	198	0	0	0	0	0	0	0	0	3	0	0	0	0	0	0	0	0	0	0	0	0	0	0	22	0	0	10	0	0	2	0	0	0	0	0	0	0	0	0	0	1	0	0
Cluster-10.834	0	0	0	0	0	0	0	41	0	0	1	0	0	2	0	0	0	0	0	0	0	0	0	0	0	0	0	0	0	0	0	0	0	0	0	0	0	0	0	0	0	0	0	0
Cluster-10.835	19	0	0	0	0	86	1	3	0	0	1	0	0	4	0	0	103	0	0	0	0	0	0	0	0	0	0	0	1	0	0	0	0	1	0	0	0	0	0	18	3	0	0	1
Cluster-10.836	0	0	99	0	0	0	0	0	4	0	0	0	0	0	43	2	0	0	0	0	0	0	0	0	0	0	0	0	0	0	0	23	0	0	0	0	0	0	0	0	0	0	0	0
Cluster-10.837	0	0	0	0	0	0	0	0	0	0	0	0	1	63	0	0	0	0	0	0	0	0	0	0	0	0	0	0	0	0	0	1	0	0	0	30	7	0	0	0	0	0	0	0
Cluster-10.838	0	0	0	0	0	0	0	0	0	0	34	0	3	226	0	0	0	0	0	0	16	0	0	27	0	0	0	0	0	0	0	0	0	52	0	0	29	0	6	0	0	0	0	1
Cluster-10.839	1	0	484	0	0	1002	0	0	79	0	64	2	0	0	563	0	0	0	18	0	0	1	0	0	4187	409	1	0	0	0	1	0	0	0	1	0	0	1	0	0	0	0	0	3
Cluster-10.840	0	0	2	0	0	0	0	2	0	0	0	0	0	0	0	0	0	0	1	0	0	0	1	0	0	0	0	0	0	0	0	10	0	1	0	0	0	0	0	0	0	0	0	0
Cluster-10.841	5252	1	13	0	24	39	0	49	0	1	114	0	0	253	0	0	0	0	1	0	0	0	0	0	14	0	2	3	0	552	0	5	0	0	0	21	0	0	0	0	296	1	7	13
Cluster-10.842	0	1	105	0	0	155	0	0	16	0	0	0	0	0	96	0	0	0	1	0	0	0	0	0	1985	77	0	0	0	0	0	0	0	0	0	0	0	0	0	0	0	0	0	1
Cluster-10.843	0	3	703	0	1	286	0	0	124	0	0	1	0	0	930	0	0	0	0	0	0	0	0	0	1516	157	0	0	0	0	0	2	0	2	0	0	0	0	1	0	308	0	0	0
Cluster-10.844	5	0	6	0	0	0	33	0	1	0	0	0	0	3	1	0	1	0	0	0	4	0	857	2	0	0	0	1	0	749	0	0	0	2	4	0	0	34	3	0	0	0	0	0
Cluster-10.845	0	0	405	1	1	0	3	0	24	0	0	0	0	0	138	0	0	3	6	0	0	12	25	0	0	42	2	14	1	16	19	5	0	1	2	0	0	953	0	0	0	1	0	0
Cluster-10.846	0	0	0	46	1	0	56	0	0	0	1	0	53	0	0	0	4	0	0	0	1	162	121	0	0	0	1	5	1	0	0	0	0	0	28	0	31	0	0	0	0	0	0	0
Cluster-10.847	0	1	0	0	17	3	0	2	0	1	0	4	0	1	0	0	0	0	0	0	0	1	2	0	2	5	0	0	0	3	0	0	0	0	1	0	0	0	0	0	1	0	0	2
Cluster-10.848	0	0	12	0	0	0	0	0	0	0	0	0	0	0	9	0	0	0	1	0	0	0	0	0	0	0	0	0	0	0	0	2	0	5	0	0	1	0	3	0	0	11	0	0
Cluster-10.849	38	0	200	28	52	25	14	31	9	25	569	0	18	28	113	26	10	12	9	0	15	27	21	12	49	0	16	18	12	101	14	96	18	29	107	1	17	0	41	7	0	26	47	149
Cluster-10.850	0	0	0	0	0	0	0	0	0	0	0	0	1	0	0	0	4	1	25	0	0	0	0	3	0	0	0	0	0	0	0	0	0	11	0	0	2	0	0	0	0	0	0	4
Cluster-10.851	0	0	0	0	0	3	0	0	0	0	0	0	3	0	0	0	0	0	0	0	0	0	2	0	0	0	0	2	6	0	2	0	0	1	0	0	22	4	2	1	0	0	0	0
Cluster-10.852	1	49	16	113	1498	7	15	2	0	6	22	0	191	4	3	76	1	21	24	0	73	11	6	192	3	32	28	262	3003	51	83	326	3	878	26	1	23	3	421	503	736	89	0	3
Cluster-10.853	0	0	1	16	0	0	217	0	0	0	629	0	2	0	0	12	0	1	543	0	0	124	226	1	0	0	0	0	0	0	0	525	40	7	11	0	0	0	9	6	0	0	0	1
Cluster-10.854	0	0	0	0	0	0	0	0	0	0	0	0	1	11	0	0	0	0	0	0	1	0	18	0	0	0	1	0	0	0	0	0	0	0	167	0	0	0	0	0	0	0	0	0
Cluster-10.855	0	0	0	0	0	5	0	4	0	0	0	0	22	0	0	0	0	0	0	0	0	0	37	0	0	0	8	5	0	0	9	0	0	0	0	0	51	24	0	3	0	0	0	0
Cluster-10.856	0	0	0	0	0	4	0	0	0	0	0	0	7	0	0	0	0	0	0	0	0	0	10	0	0	0	10	7	0	0	3	0	0	0	0	0	31	13	0	5	0	0	0	0
Cluster-10.857	0	0	0	1	0	1234	475	0	0	94	0	3	0	0	0	0	0	0	0	0	1	0	0	0	1146	270	0	0	1	7	0	0	0	1	0	3865	0	0	0	0	0	0	0	0
Cluster-10.858	0	3	0	0	0	0	293	0	0	0	1	0	0	0	0	0	22	4	0	0	0	0	0	0	0	0	4	6	0	0	5	0	0	4	0	0	0	0	21	0	6	0	0	0
Cluster-10.859	0	0	0	0	0	0	259	0	0	0	1	0	0	0	0	0	2	6	0	0	0	0	0	0	0	0	0	0	0	0	0	0	0	0	0	0	0	0	2	0	0	0	0	0
Cluster-10.860	0	0	0	1	0	0	0	0	0	0	0	0	0	0	1	1	0	0	0	0	0	3	0	0	122	0	1	0	0	6	0	40	0	0	0	0	1	0	0	0	2	0	0	0
Cluster-10.861	0	0	0	0	0	0	0	0	0	0	0	0	0	0	0	0	0	0	0	0	21	0	0	0	0	17	0	0	0	0	0	0	0	2	0	0	0	0	5	0	0	0	0	0
Cluster-10.862	0	0	0	0	0	0	0	0	0	0	2	0	0	1	0	0	0	1	0	0	0	0	0	31	1	1	0	0	162	12	0	2	0	43	0	0	1	0	15	1	2	0	0	0
Cluster-10.863	0	0	0	0	0	0	4	0	4	0	40	0	0	0	0	0	0	1	22	0	0	0	0	0	0	0	0	0	0	0	0	0	0	0	0	0	1	0	1	0	0	1	0	0
Cluster-10.864	0	0	0	0	0	0	28	0	6	0	567	0	0	0	1	0	0	1	447	0	1	0	1	1	0	0	0	0	0	60	0	0	0	2	0	0	0	0	0	0	0	0	0	0
Cluster-10.865	0	0	31	1	0	0	0	0	0	0	1	0	2	31	16	0	0	0	0	0	1	12	12	3	0	0	0	0	2	0	0	6	0	2	0	0	7	0	4	3	0	1	0	1
Cluster-10.866	0	0	0	0	6	1	0	0	0	0	0	0	16	0	0	0	0	0	0	0	0	0	21	0	0	0	4	52	0	1	14	2	0	0	0	1	93	24	0	10	0	0	0	0
Cluster-10.867	0	0	0	0	0	0	1	2	103	0	1	0	0	1	0	0	0	0	0	0	0	0	0	0	0	0	0	1	2	675	0	0	0	0	0	0	0	0	0	1	0	0	0	0
Cluster-10.868	0	0	0	0	0	0	1	0	0	0	0	0	0	0	0	0	0	50	0	0	0	0	0	0	5	0	0	0	0	2	0	25	0	0	0	0	0	0	0	2	0	0	0	0
Cluster-10.869	0	0	1	8	0	1	27	0	0	0	1	0	0	4	15	0	0	1	16	0	0	0	1	0	224	4	29	299	1	0	319	1	60	0	1	0	0	1	0	0	4	0	0	1
Cluster-10.870	164	0	197	0	2	0	2	1	0	187	479	0	0	0	102	0	0	2	33	0	0	0	161	1	0	1	0	1	0	28	0	0	0	0	0	0	0	45	0	0	0	0	22	118
Cluster-10.871	0	0	0	0	1	0	0	0	0	0	0	0	0	0	0	0	0	0	0	0	0	0	0	0	0	1	0	0	0	653	0	0	0	0	0	0	0	0	0	0	0	0	0	0
Cluster-10.872	0	0	0	0	0	3	0	0	0	0	0	0	19	205	0	0	0	18	0	0	0	0	0	26	0	0	36	130	13	42	60	0	2	354	44	0	40	0	505	0	0	1	0	0
Cluster-10.873	0	0	0	0	0	0	0	0	0	0	0	0	4	0	0	0	0	0	0	0	13	0	0	3	0	0	0	0	0	0	0	0	0	49	0	0	0	0	8	0	0	0	0	0
Cluster-10.874	0	0	1	4	0	0	1	0	0	0	0	0	1	3	0	2	3	0	5	0	0	61	2	0	2	1	0	0	0	0	1	2	1	0	1	0	0	0	0	0	0	0	0	0
Cluster-10.875	0	0	0	0	0	0	1	0	0	0	119	0	0	0	0	0	0	0	419	0	0	0	0	0	0	0	0	0	0	0	0	0	0	0	0	0	0	0	0	0	0	0	0	15
Cluster-10.876	0	0	0	0	2	0	0	0	0	0	5	0	32	0	0	0	69	53	5	0	0	0	0	297	13	0	2	3	7	34	0	1	0	318	1	0	68	0	19	0	1	4	1	2
Cluster-10.877	0	0	0	0	0	4	0	0	0	0	9	0	20	494	0	0	0	4	0	0	13	0	0	27	0	0	20	85	0	40	29	0	1	190	31	0	31	0	217	0	0	3	0	0
Cluster-10.878	0	0	0	0	0	0	0	0	0	0	0	0	1	0	0	0	0	0	0	0	0	0	0	0	0	1	0	4	3	0	9	0	0	36	0	0	2	0	63	0	8	6	0	0
Cluster-10.879	0	0	0	0	0	160	0	13	0	0	0	0	0	1	0	0	105	0	0	0	0	0	0	0	0	0	0	0	2	0	0	0	0	0	0	0	0	0	0	25	0	6	0	0
Cluster-10.880	0	0	0	0	0	0	0	82	0	0	0	0	2	0	0	5	0	3	1	0	1	0	0	6	271	0	0	0	1	4	0	68	1	112	0	1	5	0	128	1	1	2	1	0
Cluster-10.881	0	13	1	0	358	0	0	0	0	0	0	0	39	115	11	6	637	1	0	0	1890	3	130	1	0	29	154	872	174	16	20	141	1	2	12904	53	459	5	2	3	3	2	0	1
Cluster-10.882	0	0	0	0	0	0	0	0	0	0	0	0	0	0	0	0	9	1	0	0	0	0	0	0	0	0	0	0	0	1	0	0	0	0	0	0	0	0	0	23	0	0	0	0
Cluster-10.883	0	0	0	0	0	0	0	0	0	0	22	0	0	0	0	0	0	0	17	0	0	0	0	0	0	0	0	0	0	0	0	0	0	0	0	0	0	0	0	0	0	0	0	4
Cluster-10.884	0	0	0	0	0	0	0	0	0	0	0	0	1	1	0	0	0	0	92	0	1	0	0	4	0	0	0	1	1	0	0	17	0	3	0	0	1	0	14	0	2	4	0	0
Cluster-10.885	0	0	0	4	0	0	0	0	0	0	0	0	0	0	0	0	0	0	0	0	0	51	0	0	0	0	0	0	0	0	0	0	0	3	0	0	1	0	7	0	0	2	0	0
Cluster-10.886	0	0	6	0	0	0	3	0	0	0	0	0	0	402	0	1	0	0	0	0	0	0	4	0	0	0	1	1	184	6	0	153	0	0	24	4	3	2	1	0	0	0	0	0
Cluster-10.887	0	0	0	0	0	0	0	0	0	0	74	0	1	0	0	0	0	0	43	0	0	0	0	0	0	1	0	0	0	0	0	0	0	0	0	0	0	0	0	0	0	0	0	12
Cluster-10.888	0	0	0	0	0	0	341	0	2	0	0	0	0	0	0	0	0	0	0	0	0	0	0	0	0	0	0	0	1420	0	0	0	18	0	0	0	0	0	0	0	0	0	0	0
Cluster-10.889	1	33	0	0	0	0	0	0	0	0	0	0	0	0	0	0	0	96	0	0	0	0	0	0	0	0	0	0	0	0	0	0	0	0	0	0	0	0	0	0	0	0	0	0
Cluster-10.890	0	1	1062	0	0	1	0	0	185	0	0	0	0	0	629	0	0	0	0	0	0	0	54	0	0	0	0	0	0	0	0	0	0	0	0	0	0	0	0	0	0	0	0	0
Cluster-10.891	1	0	0	0	4	0	128	0	18	0	0	0	2	0	0	0	5	85	0	0	4	6	0	4	1	0	3	6	4	136	2	0	0	6	0	0	4	0	11	2	0	0	0	0
Cluster-10.892	0	1	2	17	6	0	0	0	0	0	0	0	0	0	15	0	0	227	0	0	0	13	31	0	0	9	645	779	0	1	1	1	0	0	14	0	0	246	0	0	653	0	0	0
Cluster-10.893	0	0	0	8	0	0	0	0	0	0	0	0	69	0	0	0	0	0	0	0	29	1	21	75	0	0	2	2	37	1	0	2	0	100	0	1	109	2	119	2	0	11	0	0
Cluster-10.894	0	0	0	0	26	28	0	22	0	0	0	0	65	0	0	0	0	0	0	0	1	0	99	0	1	0	235	460	0	1	138	0	0	0	0	0	515	58	1	199	1	0	0	0
Cluster-10.895	0	0	0	0	0	8	0	0	0	0	0	0	0	0	0	0	7	0	0	0	0	0	0	0	0	0	3	2	0	0	7	0	0	0	0	0	0	0	0	0	0	0	0	0
Cluster-10.896	39	1	45	0	4	1	322	1	3	0	0	3	3	1	16	0	0	3	0	0	3	6	0	4	2516	7	393	1764	6	46	1393	2	0	5	2	13	4	0	2	5	1	501	0	6
Cluster-10.897	0	0	0	0	0	1	0	25	0	0	0	0	0	0	0	0	0	0	0	0	6	0	0	0	0	1	1	0	0	8	0	0	0	2	2	0	0	0	0	446	0	4	0	0
Cluster-10.898	0	1	75	0	886	20	2	3	153	0	30	0	0	0	71	21	0	1	0	0	2	2	129	8	6	7	2	12	32	20	0	97	0	14	933	17	1	0	11	50	0	34	0	2
Cluster-10.899	0	0	0	0	0	0	0	14	0	0	0	0	0	0	0	0	0	0	1	0	0	0	0	0	2	6	0	0	1	1	0	0	0	0	0	0	0	0	0	0	54	0	0	0
Cluster-10.900	3	0	35	0	0	3	7	3	3	0	18	0	8	1	3	0	0	4	5	0	1	0	0	3	27	3	6	10	7	316	4	20	0	10	0	2	4	0	11	2	6	2	0	0
Cluster-10.901	1	0	0	0	0	2	0	0	0	0	0	0	6	0	0	0	0	0	11	0	7	0	0	4	89	0	0	0	1	0	0	0	0	7	11	0	82	18	0	0	50	3	0	0
Cluster-10.902	0	0	0	0	0	0	0	0	0	0	0	0	0	0	0	0	0	0	0	0	0	0	0	0	0	0	48	847	0	2	396	0	0	0	0	0	0	0	0	0	0	0	0	0
Cluster-10.903	95	0	19	94	166	47	26	53	17	55	217	0	16	82	48	160	37	10	41	0	28	124	26	20	214	21	23	33	6	112	11	47	129	62	0	2	67	3	24	24	12	95	202	31
Cluster-10.904	0	0	0	0	0	0	0	0	0	0	0	0	1	0	0	0	0	0	183	0	1	0	1	3	0	0	0	0	0	0	0	0	0	6	0	0	0	0	0	0	0	0	0	0
Cluster-10.905	0	0	0	0	0	0	0	0	0	0	0	0	448	0	0	2	0	0	0	0	0	0	157	0	0	0	1	3	0	0	0	279	0	0	0	0	36	1	1	1	839	0	0	0
Cluster-10.906	395	0	2	1	2	3	4	3	5	1	1	0	2	1147	1	0	0	2	23	0	0	21	0	0	0	0	2	3	2	0	5	26	0	0	1	0	0	5	1	0	25	1	1	1
Cluster-10.907	0	0	0	0	0	0	0	0	0	0	3	0	0	0	0	0	0	0	1	0	0	0	1	0	0	0	0	0	0	1	0	0	0	0	0	0	0	0	0	0	4	0	0	1
Cluster-10.908	0	0	0	3	3507	2	0	0	0	0	4	0	0	1	0	0	1	3	0	0	1	7	0	1	1	2	1	1	2	11	2	4	0	1	3	0	1	12	0	1	0	0	0	0
Cluster-10.909	0	0	0	0	0	0	65	0	0	0	0	0	586	1	0	0	42	5	0	0	747	0	0	763	0	0	0	0	0	4	0	0	4	875	42	0	101	1	1115	17	2	0	1	0
Cluster-10.910	0	0	0	0	158	0	1	0	0	0	0	0	1	0	0	0	0	0	0	0	0	0	0	0	16	0	1133	2047	0	1	275	0	0	0	0	0	91	3	0	0	0	6	0	0
Cluster-10.911	0	1	0	0	3	0	0	0	0	14	0	0	0	0	0	2	0	0	0	0	0	0	0	0	0	0	0	3	0	0	0	28	0	0	0	0	1	0	3	60	0	0	0	0
Cluster-10.912	0	0	2	0	680	0	0	0	0	0	0	0	181	0	0	0	0	0	0	0	0	0	0	0	0	0	0	0	0	1	0	0	0	0	0	0	60	0	0	0	0	0	0	0
Cluster-10.913	0	0	0	1	1075	0	919	0	0	2	1	0	931	15	0	0	2	1911	1	0	0	0	0	4	0	0	1	0	1	2	0	0	40	6	0	0	3	0	5	0	0	465	0	0
Cluster-10.914	0	0	0	0	0	0	2	250	0	0	0	0	204	0	0	0	41	2	0	0	0	0	0	12	0	7	3	184	11	3	340	2	0	561	4	197	38	0	1239	1	1079	0	0	0
Cluster-10.915	0	0	0	0	6	1	0	0	0	0	0	0	1	0	0	0	1	0	0	0	0	0	10	0	22	0	0	0	0	0	0	0	0	0	0	0	0	0	0	0	0	0	0	0
Cluster-10.916	0	0	336	0	6	0	1	0	0	2	7	0	0	1	31	0	0	0	0	0	1	0	0	0	1	0	0	6	7	6	0	0	0	0	0	0	1	0	0	0	0	0	0	1
Cluster-10.917	0	0	0	0	0	0	35	0	0	0	0	0	0	0	0	0	0	0	0	0	0	0	0	0	0	0	1	0	0	0	0	0	0	1	0	0	0	0	0	0	0	0	0	0
Cluster-10.918	0	0	0	0	0	0	0	0	0	0	176	0	0	0	0	0	0	0	0	0	0	0	0	0	0	0	0	0	0	3	0	0	0	0	0	0	0	0	0	0	0	0	0	0
Cluster-10.919	0	0	0	0	0	0	0	0	0	0	0	0	11	0	0	5	0	0	0	0	28	0	23	72	0	0	0	7	1107	640	0	51	0	49	0	0	20	0	23	3	1	1	0	0
Cluster-10.920	0	0	0	1	1	0	0	0	0	54	0	0	0	0	0	1	0	0	0	0	0	0	0	0	0	0	0	0	0	1	0	16	0	0	0	0	0	0	0	9	0	0	0	0
Cluster-10.921	0	0	0	0	0	0	0	0	0	0	0	0	180	0	0	0	36	0	0	0	0	0	0	19	0	15	4	229	8	1	390	0	1	574	11	0	40	0	1323	3	754	0	0	0
Cluster-10.922	0	12	0	0	0	0	0	0	0	0	0	0	37	0	0	0	0	0	0	0	22	0	0	31	0	33	0	0	325	1	1	0	0	231	0	0	0	1	103	71	175	21	1	0
Cluster-10.923	0	0	0	0	0	0	0	0	0	0	36	0	0	0	0	0	0	2	0	0	0	0	0	0	0	0	0	0	0	0	0	0	0	0	0	0	0	0	0	0	0	0	0	0
Cluster-10.924	0	0	0	0	0	0	0	0	0	0	374	0	0	0	0	5	0	0	663	1	0	0	0	0	0	0	0	0	0	1	0	334	0	0	0	0	0	0	0	0	0	0	0	0
Cluster-10.925	0	0	0	0	0	0	0	2	0	0	0	1	6	0	0	0	0	0	0	0	13	0	0	38	1039	0	0	0	0	5	0	1	0	24	0	0	14	0	20	0	0	5	0	1
Cluster-10.926	0	0	0	0	0	0	11	0	0	0	0	0	0	0	0	0	0	24	0	0	0	0	0	0	0	0	102	308	0	241	4	0	2	0	0	0	1	0	0	0	119	3	0	0
Cluster-10.927	0	0	0	0	0	0	63	0	0	0	0	0	0	9	0	0	0	0	1	0	0	0	0	0	0	0	0	0	1244	2	1	0	0	0	0	0	0	0	0	0	0	0	0	0
Cluster-10.928	0	0	0	1	670	0	0	0	0	0	0	0	85	0	0	0	39	0	0	0	123	1	4	0	0	10	377	949	800	5	123	0	0	0	1265	0	683	2	0	1	0	0	0	1
Cluster-10.929	5027	0	1	0	1	577	1	62	1	2	1580	1	1	0	0	0	0	0	2	0	0	0	0	0	36	0	0	5	0	1	4	1	0	0	0	3	0	2	0	0	387	2	0	164
Cluster-10.930	0	0	106	0	0	0	0	4	0	0	0	0	0	0	89	0	0	0	11	0	0	0	60	0	0	2	6	2	0	32	0	0	0	1	0	0	0	0	1	3	0	0	0	1
Cluster-10.931	0	0	7	122	38	0	0	0	0	8	0	0	30	0	140	1	0	2141	0	0	0	189	290	0	0	1	123	167	4	0	1	0	0	0	4	6	11	35	0	0	141	3	0	0
Cluster-10.932	0	0	1	0	19	0	6	0	94	321	38	0	0	42	7	3	1	5	3	0	2	0	0	1	668	3	0	31	1214	202	0	11	0	11	25	0	0	2	0	0	0	0	0	2
Cluster-10.933	2	48	0	0	0	0	2	7	0	0	18	0	29	4	1	0	0	119	1	0	29	0	0	45	0	1	71	153	97	25	59	2	0	92	52	6	2	6	42	53	51	14	1	0
Cluster-10.934	0	0	3	0	0	0	0	0	0	0	10	0	110	0	0	55	0	0	4	0	19	0	1345	66	0	0	0	0	52	2	0	2579	5	56	0	0	23	1	27	21	211	7	0	0
Cluster-10.935	0	0	1	1	0	0	0	0	0	0	0	0	0	0	0	0	0	0	0	0	0	8	0	0	0	8	0	0	0	670	0	0	0	0	0	0	0	0	0	0	0	0	0	0
Cluster-10.936	0	0	52	0	0	0	0	0	0	0	1	0	0	0	2	0	3	0	0	0	0	0	0	0	0	0	1	4	2	2	6	0	0	0	0	0	1	0	1	0	0	0	0	0
Cluster-10.937	0	0	2	0	0	0	0	0	0	0	2	0	0	1	2	0	0	2	24	0	0	0	1	0	1	3	0	4	0	3	1	0	1	0	0	0	0	0	0	0	1	0	0	7
Cluster-10.938	0	0	0	0	0	0	0	0	0	0	0	0	1	0	0	0	0	0	0	0	0	0	0	0	0	0	0	0	0	0	0	0	0	0	0	0	0	0	0	0	28	0	0	0
Cluster-10.939	0	0	2	1	0	140	1	1	0	0	18	0	511	1	10	0	0	0	9	0	3	3	0	31	0	0	0	3	0	0	34	2	0	925	0	30	24	3	33	14	49	433	1	1
Cluster-10.940	19	2	3107	1	1	0	0	0	599	3	31	1	0	624	520	4	45	2	0	0	70	16	2	631	2	0	0	5	1	10	17	0	5	616	1	0	0	0	454	0	0	3	5	0
Cluster-10.941	0	0	1	0	0	5	0	0	0	0	0	0	0	0	0	0	2	0	3	0	0	0	0	0	0	0	3	5	3	0	5	0	0	0	0	0	0	0	0	0	0	0	0	0
Cluster-10.942	0	0	0	0	0	0	719	0	2	0	0	0	1	0	0	1	0	0	0	0	0	0	0	2	205	0	0	0	1254	3	0	4	9	5	0	0	0	0	9	1	14	1	0	0
Cluster-10.943	0	0	0	0	0	0	4	0	1	60	0	0	1	0	0	0	0	0	0	0	5	0	0	16	0	0	0	0	0	0	0	0	0	1	0	2	3	0	3	0	9	0	0	0
Cluster-10.944	0	0	13	0	0	0	0	2	1	0	0	0	0	0	0	1	0	0	5	0	0	0	0	0	6	0	1	12	1	21	4	12	0	2	0	0	2	1	0	3	4	2	1	0
Cluster-10.945	0	0	0	2	0	0	0	0	0	0	39	0	0	0	0	0	1	0	1	0	0	2	0	1	0	0	2	7	2	0	1	0	0	3	0	0	5	0	2	0	1	3	0	0
Cluster-10.946	1	0	2	0	1	10	0	0	0	0	33	0	0	0	2	0	1	0	1269	0	1	3	0	1	2	0	6	16	6	0	12	3	0	1	0	0	3	0	5	0	0	0	0	1
Cluster-10.947	6	72	0	0	0	0	0	0	0	0	0	0	0	0	0	0	0	225	0	0	0	0	0	0	0	0	0	0	1	13	0	0	0	0	0	0	0	0	0	0	0	0	0	0
Cluster-10.948	30	0	0	10	45	9	4	11	3	10	28	0	6	13	10	46	8	0	2	0	236	32	11	573	24	0	0	0	17	0	1	6	25	708	5	1	0	0	376	4	1	830	45	3
Cluster-10.949	0	0	0	0	0	460	0	24	0	0	0	0	1	1	0	0	417	2047	0	0	1	0	0	0	0	0	9	9	6	0	18	0	0	0	0	0	0	0	1	55	0	22	0	2
Cluster-10.950	0	0	0	0	0	0	0	0	0	0	0	0	0	0	0	0	1	0	22	0	1	0	2	0	0	0	2	5	9	0	4	1	0	6	0	0	4	0	2	0	0	0	0	0
Cluster-10.951	1	0	0	0	0	0	0	0	0	160	0	0	0	0	0	0	0	0	0	0	0	0	0	0	0	0	0	0	0	83	0	0	0	0	0	0	0	0	0	0	0	0	0	0
Cluster-10.952	0	0	39	0	0	0	0	0	0	0	0	0	0	0	37	0	0	0	0	0	0	0	0	0	0	0	0	0	0	0	0	0	0	0	0	0	0	0	0	0	0	0	0	0
Cluster-10.953	2	0	9	0	0	32	244	136	3	2	16	0	2	17	15	2	32	12	1	0	6	19	27	5	9	2	11	12	3	1229	15	5	11	11	38	0	23	1	0	0	0	6	0	271
Cluster-10.954	0	0	0	30	3	0	0	0	0	0	0	0	341	0	1	1	9	0	0	0	17	56	662	0	0	1	8	17	0	1	0	1	0	0	177	0	147	0	0	0	0	0	0	0
Cluster-10.955	0	0	0	0	0	0	0	2	0	0	0	0	0	0	0	2	0	0	0	0	0	0	3	0	0	0	0	0	0	0	0	32	0	0	0	0	0	0	0	0	0	0	0	0
Cluster-10.956	0	0	0	0	250	0	0	0	0	0	0	0	7	0	0	0	9	0	0	0	30	0	1	0	0	0	224	388	0	0	60	0	0	0	180	0	178	0	0	0	0	0	0	0
Cluster-10.957	0	0	25	2	14	0	0	0	0	4	0	0	10	0	2	0	0	1	0	0	3	1	0	0	0	1	0	1	4	0	0	0	0	0	5	0	66	0	0	0	7	0	0	0
Cluster-10.958	0	0	0	3	0	0	0	0	0	0	0	0	0	0	5	0	0	6	19	0	0	0	0	0	0	1	0	1	0	13	3	1	0	0	0	0	0	0	0	0	0	0	0	4
Cluster-10.959	0	0	0	0	0	0	0	0	0	0	0	0	0	0	0	0	0	0	0	0	0	0	0	0	694	2	1	0	0	2014	0	0	0	0	0	0	0	0	0	0	11	0	0	0
Cluster-10.960	0	0	36	0	0	8	0	0	1	0	15	0	0	0	5	0	2	0	1	0	0	0	2	14	0	0	9	16	11	0	22	0	0	10	0	0	5	0	3	0	0	29	0	0
Cluster-10.961	0	0	0	23	0	0	0	0	0	0	0	0	0	0	0	0	0	0	0	0	0	23	0	0	0	0	0	0	0	0	0	0	0	0	0	0	0	0	0	0	0	0	0	0
Cluster-10.962	0	1	26	15	0	0	0	0	0	0	0	0	0	0	3	0	1	0	2	0	0	14	0	0	0	0	0	0	1	1	0	0	0	0	0	0	0	0	0	0	0	0	0	0
Cluster-10.963	0	0	0	0	0	0	0	0	0	0	0	0	0	0	0	0	0	0	0	0	0	11	0	0	0	0	0	0	0	0	0	0	0	0	0	0	0	0	0	0	0	0	0	0
Cluster-10.964	0	0	24	33	0	3	0	0	0	0	3	0	0	0	5	0	0	0	12	0	0	102	1	5	0	0	8	10	12	0	6	2	0	4	0	0	1	0	3	0	0	6	0	0
Cluster-10.965	0	0	12	7	0	0	0	0	0	0	0	0	0	0	43	0	0	0	30	0	0	16	0	0	0	0	0	39	0	0	141	0	0	0	0	0	0	0	0	6	0	0	0	0
Cluster-10.966	0	0	1	0	0	0	0	0	0	0	0	0	0	1	0	0	23	0	0	0	0	0	0	0	0	0	0	0	0	0	0	0	0	1	0	0	0	0	3	6	0	0	0	0
Cluster-10.967	0	0	96	4	0	1	0	0	0	0	2	0	0	0	18	0	5	0	18	0	0	19	0	9	0	0	1	7	8	0	8	4	0	11	0	0	8	0	9	0	0	17	0	0
Cluster-10.968	0	0	13	5	0	0	0	0	0	0	0	0	1	0	30	0	0	0	53	0	0	30	0	1	0	23	2	43	0	0	112	0	0	0	0	0	0	0	0	2	0	1	0	0
Cluster-10.969	1	0	30	2	2	5	3	15	14	2	7	0	2	9	6	3	2	6	6	0	0	13	4	2	22	0	6	98	1	16	10	7	0	11	0	0	17	0	5	0	0	0	0	5
Cluster-10.970	0	0	0	0	0	0	0	48	0	0	2	0	0	0	0	3	0	0	1	0	0	0	0	0	17	0	0	0	0	0	0	43	0	0	0	0	0	0	0	3	0	0	0	1
Cluster-10.971	0	0	14	0	0	1	87	0	2	4	6	0	1	1	12	0	1	146	4	0	0	2	2	0	0	1	4	11	4	62	20	0	3	1	19	0	0	2	1	0	0	0	0	1
Cluster-10.972	0	0	5	5	0	120	0	0	1	0	37	0	0	0	1	0	5	0	27	0	1	2	18	1	1	2	87	223	17	1	279	1	0	9	1	0	14	0	1	0	1	4	0	1
Cluster-10.973	0	0	5	0	0	0	0	0	0	0	0	0	0	0	5	0	0	1	19	0	0	1	0	1	0	4	1	4	0	4	4	0	0	1	0	0	0	671	2	0	1	0	0	6
Cluster-10.974	0	0	0	10	0	0	0	0	0	0	0	0	0	0	0	0	0	0	0	0	0	27	0	0	0	0	0	0	0	0	0	0	0	0	0	0	0	0	0	0	0	0	0	0
Cluster-10.975	0	0	10	0	278	0	0	0	0	0	0	0	19	0	2	0	1	224	35	0	0	0	0	103	75	17	26	62	2	14	118	6	2	88	0	0	28	9	16	2	6	5	0	13
Cluster-10.976	0	0	0	16	0	0	0	0	0	0	0	0	0	0	0	0	0	0	0	0	0	32	0	0	0	0	0	0	0	0	0	0	0	0	0	0	0	0	0	0	0	0	0	0
Cluster-10.977	0	0	0	6	0	0	0	0	0	2	0	0	0	0	0	0	0	15	0	0	0	34	0	0	0	0	0	0	0	0	0	0	0	0	0	0	0	0	0	0	0	0	0	0
Cluster-10.978	0	0	0	2	0	0	0	0	0	0	0	0	0	0	0	0	0	0	0	0	0	30	0	0	0	0	0	0	0	0	0	0	0	0	0	0	0	0	0	20	0	0	0	0
Cluster-10.979	0	0	60	11	0	230	0	0	0	0	1	0	680	0	139	0	0	0	36	0	0	0	0	28	8	59	3	46	7	1	92	0	0	540	0	0	32	1	19	23	1	93	0	0
Cluster-10.980	0	0	0	0	0	0	0	0	0	0	6	0	1	0	0	0	0	0	0	0	1	0	0	0	0	0	1	34	13	2	35	0	0	0	0	0	0	0	0	0	2	0	0	0
Cluster-10.981	1	0	44	0	1138	1	3	14	5	4	61	0	2	18	9	1	1	16	19	0	8	0	0	9	57	1	41	146	10	55	183	28	0	18	0	0	32	0	6	18	168	5	2	0
Cluster-10.982	4	0	0	1	0	0	0	0	0	0	0	0	0	8	0	0	0	0	0	0	9	8	238	0	0	0	0	0	0	0	0	0	0	0	0	0	0	0	0	0	1	0	0	0
Cluster-10.983	0	0	0	3	0	0	0	0	0	0	769	0	0	0	0	0	3	3	0	0	17	28	4	0	0	1	8	43	0	3	31	0	0	0	0	0	1	0	0	1	0	0	0	0
Cluster-10.984	0	0	0	0	0	0	0	0	0	0	16	0	0	0	0	0	0	0	0	0	0	0	0	0	0	0	0	0	0	0	0	0	0	0	0	0	0	0	0	0	0	0	0	14
Cluster-10.985	0	0	0	0	0	0	0	0	0	0	0	0	0	0	0	0	0	0	0	0	0	0	0	0	0	2	0	0	1327	1	0	0	1	0	1	0	0	1	0	0	0	0	0	0
Cluster-10.986	0	0	0	0	0	0	0	0	0	12	0	0	0	0	0	0	0	0	0	0	0	0	0	0	0	0	0	0	0	1	1	0	0	0	0	0	0	0	0	0	0	0	0	0
Cluster-10.987	3	0	0	0	0	1	3	0	0	2	6	0	0	4	1	0	1	0	2	0	0	0	0	0	13	8	1	2	0	0	5	1	4	0	0	0	0	0	0	0	0	0	0	0
Cluster-10.988	0	0	0	0	0	0	0	0	0	0	1	1	0	0	0	2	0	0	0	0	15	0	0	32	715	0	0	0	89	0	0	20	0	19	0	0	9	0	7	0	0	13	0	0
Cluster-10.989	0	0	0	0	43	0	0	0	0	0	1	0	0	0	0	0	0	0	0	0	0	0	0	0	0	0	333	486	3	0	81	0	0	0	0	0	26	0	0	0	0	0	0	0
Cluster-10.990	6	2	16	64	242	72	380	80	104	1	21	0	102	129	9	7	10	97	26	0	180	246	2	121	63	5	51	201	185	4830	101	226	4	264	221	56	82	0	142	168	205	68	0	8
Cluster-10.991	0	0	0	0	0	0	0	0	0	100	1	0	0	6	0	0	1	0	0	0	0	0	0	0	0	47	1	0	4	2	0	0	0	0	0	0	0	0	0	0	0	0	0	0
Cluster-10.992	2	0	6	0	0	9	0	0	0	2	1	0	13	0	4	0	0	0	2	0	0	0	0	2	2	2	2	4	1	0	3	2	0	23	1	7	2	1	3	0	2	8	0	0
Cluster-10.993	0	2	61	10	0	0	25	8	0	0	0	0	8	0	33	0	0	2	0	0	3	0	0	0	0	0	1	0	125	559	0	0	0	64	0	0	37	0	127	88	0	7	0	0
Cluster-10.994	1	0	25	0	1	0	7	6	3	1	21	0	3	7	12	3	3	8	20	0	3	2	0	3	20	7	11	75	3	551	20	11	4	11	0	4	45	2	9	8	15	4	0	0
Cluster-10.995	0	2	439	50	0	134	2	0	4	0	1	0	366	0	1010	1	10	0	483	0	0	8	0	28	0	90	18	195	12	13	450	46	0	382	4	1	18	19	8	176	6	100	0	29
Cluster-10.996	0	0	0	0	0	0	0	0	0	0	1	0	0	0	0	0	1	8	0	0	0	0	5	0	0	0	0	0	0	0	0	0	0	0	0	0	0	1	0	0	547	0	0	0
Cluster-10.997	0	0	0	0	11	5	24	5	5	0	140	0	30	20	0	5	5	17	47	0	26	0	0	59	108	32	17	139	38	1188	11	6	0	129	0	5	73	2	21	48	74	4	0	0
Cluster-10.998	0	1	456	47	0	0	0	0	0	1	0	0	0	920	358	0	0	1	0	0	1	549	669	0	0	68	0	0	5	2	0	0	0	0	0	45	0	0	0	423	0	0	0	0
Cluster-10.999	0	0	0	0	0	0	0	0	0	0	1	0	0	1	1	0	0	0	1	0	0	0	0	0	0	0	1	0	0	3707	4	0	1	1	1	0	1	2	1	1	0	0	0	0
Cluster-10.1000	0	0	0	0	0	0	0	0	0	0	157	0	0	0	0	0	216	623	0	0	0	0	463	0	0	1	0	0	11	0	0	0	0	1	0	2	0	0	0	0	6	2	0	1
Cluster-10.1001	0	0	0	0	0	8	0	4	0	0	0	0	0	0	0	0	0	0	0	0	0	0	19	0	1	0	102	125	0	0	50	0	0	0	0	0	1	0	0	79	0	0	0	0
Cluster-10.1002	0	0	0	18	0	0	0	0	0	0	0	0	0	0	0	0	0	0	0	0	0	220	0	6	0	0	0	0	0	0	0	0	1	60	0	0	8	2	127	0	0	14	0	0
Cluster-10.1003	0	0	0	0	0	0	848	0	0	2	0	0	1	1	0	3	0	0	1	0	0	0	0	0	1	1136	23	19	1	12	1	1	3	0	13712	3	0	460	2	2	14	0	0	0
Cluster-10.1004	0	0	16	0	6	0	0	0	0	0	425	0	0	0	4	0	0	0	0	0	0	0	0	0	0	0	0	0	0	0	0	0	0	0	0	0	1	0	0	0	0	0	0	41
Cluster-10.1005	0	0	0	0	0	0	0	0	0	0	64	0	0	0	0	0	0	0	0	0	0	0	0	0	0	0	0	0	0	0	0	0	0	0	0	0	0	0	0	0	0	0	0	0
Cluster-10.1006	0	0	9	0	2	0	2	1	0	0	9	0	4	0	1	1	1	0	5	0	2	0	0	7	19	1	1	0	15	106	0	6	0	21	2346	2	2	0	1	5	0	2	0	0
Cluster-10.1007	10	0	0	0	0	0	188	40	0	4	1	0	410	20	0	0	0	0	0	0	74	0	0	0	0	1	0	0	1	251	0	0	35	0	0	0	47	0	0	0	0	1	0	0
Cluster-10.1008	0	0	0	0	0	0	0	0	0	0	0	0	0	0	0	0	0	0	0	0	0	0	0	0	0	0	0	0	0	1101	0	0	0	0	0	0	0	0	0	0	0	0	0	0
Cluster-10.1009	0	0	1	0	3	0	0	0	0	0	0	0	0	0	0	0	0	0	0	0	0	0	0	0	0	0	4	2	0	92	0	0	0	0	1	602	0	1	1	0	1679	0	1	0
Cluster-10.1010	0	0	0	0	0	0	0	0	0	0	0	0	0	31	0	0	0	0	0	0	6	0	113	0	0	1	0	0	0	1	0	0	0	0	0	0	0	0	0	0	0	0	0	0
Cluster-10.1011	0	0	0	0	0	0	0	0	0	0	497	0	1	0	0	0	0	0	858	0	0	0	0	0	1	0	3	6	0	322	7	0	0	1	0	0	0	0	0	0	22	0	0	0
Cluster-10.1012	0	0	1	1	102	0	6	0	0	0	0	0	0	0	0	0	1	4	1	0	0	0	0	0	0	0	81	815	0	740	337	0	0	0	17	3	1	1	0	0	285	0	20	1
Cluster-10.1013	0	0	27	0	0	0	0	0	0	0	0	0	0	0	4	0	0	0	0	0	0	0	0	0	0	0	0	0	1	0	0	0	0	1	0	0	1	0	2	0	0	0	0	0
Cluster-10.1014	0	0	50	0	0	0	0	0	0	0	0	0	0	0	19	0	0	0	0	0	0	0	0	0	18	0	0	0	0	3	0	0	0	0	0	0	0	0	0	0	0	0	0	0
Cluster-10.1015	0	0	0	0	0	52	12	0	0	4	0	0	0	0	0	0	0	0	0	0	0	0	0	0	317	10	0	0	41	1	1	0	0	0	0	161	0	0	0	0	0	0	0	0
Cluster-10.1016	0	0	5	0	1	0	2	0	0	0	0	0	0	1	22	0	0	4	3	0	0	0	0	0	1	0	0	0	0	0	0	0	3	0	0	0	0	0	0	0	0	0	0	1
Cluster-10.1017	34	2	0	17	252	9	9	10	4	17	26	0	9	14	7	50	9	0	1	0	5	27	4	11	14	2	123	1840	228	8	884	2	31	55	0	0	1	0	15	19	51	23	52	5
Cluster-10.1018	0	0	0	0	0	0	0	0	0	0	0	0	0	0	0	0	0	0	0	0	0	0	0	0	0	2	0	2	0	4870	0	1	0	0	0	0	0	0	0	0	0	0	0	0
Cluster-10.1019	0	0	0	0	0	0	0	0	0	0	2	0	0	0	0	0	2	0	0	0	0	0	0	0	49	0	2	0	3	4	1	0	0	0	3855	0	3	28	0	1	3	0	320	0
Cluster-10.1020	0	0	3	0	0	0	5	0	0	0	38	0	99	0	6	0	0	8	0	0	38	0	26	104	0	0	0	1	45	0	0	1	0	131	0	0	213	0	153	7	0	14	0	4
Cluster-10.1021	0	0	0	0	0	0	0	0	0	32	2	0	0	0	0	0	0	0	2	0	0	0	0	0	1	0	0	0	0	442	0	0	0	0	0	0	0	0	2	0	0	0	0	0
Cluster-10.1022	0	0	3	0	43	0	0	0	0	0	0	0	14	0	0	0	0	0	0	0	0	0	0	0	0	0	0	0	0	0	0	0	0	0	0	0	189	0	0	0	0	0	0	0
Cluster-10.1023	0	0	0	1	0	0	0	0	0	0	1	0	0	2	0	0	0	28	0	0	5	0	15	0	0	0	0	0	0	0	0	0	0	0	1	0	0	0	0	0	0	0	0	0
Cluster-10.1024	0	0	0	0	0	0	0	0	0	41	0	0	0	0	0	0	0	0	0	0	0	0	0	0	0	1	0	0	1	0	0	0	0	0	0	0	0	0	0	0	0	0	0	0
Cluster-10.1025	0	4	1	0	0	0	1	0	0	0	394	0	0	0	0	2	0	0	0	0	0	0	5	0	82	0	37	148	571	16	4	37	0	1	1	22	0	0	1	5	0	0	0	56
Cluster-10.1026	0	0	0	0	0	0	0	0	0	0	0	0	0	0	0	0	0	0	1	0	0	0	2	0	539	0	1	1	0	0	0	1	0	0	0	0	0	0	0	0	0	0	0	0
Cluster-10.1027	0	0	0	0	0	0	1	0	0	0	0	0	0	1	0	0	0	0	0	0	0	0	0	1	0	0	0	0	0	1	0	0	0	0	863	0	0	191	0	0	0	1	2601	0
Cluster-10.1028	0	2	1	3	0	0	0	0	0	0	168	0	0	0	0	29	0	0	1938	0	0	0	0	0	0	5	0	0	0	1	1	2157	1	2	1	0	0	0	0	0	164	1	1	0
Cluster-10.1029	0	0	0	0	0	3	229	0	2	0	0	0	0	22	0	0	0	0	3	0	0	0	44	0	340	0	1	0	0	0	0	0	0	2	0	21	0	0	0	0	0	0	0	0
Cluster-10.1030	0	0	0	0	0	0	0	0	0	0	17	0	0	3	1	0	2	0	10	0	0	0	0	2	0	1	0	1	0	19	0	0	0	0	3	0	0	0	0	0	2	1	0	8
Cluster-10.1031	0	0	12	0	0	0	0	0	0	0	0	0	1	0	349	0	0	0	7	0	0	0	0	0	0	0	0	0	0	1	0	0	0	0	0	0	0	0	0	0	0	0	0	0
Cluster-10.1032	0	1	37	12	0	22	0	0	0	1	801	0	58	0	70	0	0	3	358	0	0	53	0	4	0	1099	38	1105	2	4	678	0	0	48	1	0	2	26	3	7	0	10	0	17
Cluster-10.1033	1	1	51	0	40	6	27	2	0	0	77	0	12	25	5	5	1	25	42	0	23	0	31	4	1	13	17	99	41	6	8	76	0	32	45	0	34	4	3	54	0	3	0	13
Cluster-10.1034	2	0	0	0	2089	0	260	0	0	0	0	0	0	0	0	0	0	0	1	0	0	0	0	0	0	0	0	0	0	0	0	0	5	0	0	0	0	0	0	0	0	0	0	0
Cluster-10.1035	0	0	0	0	0	0	0	0	0	0	7	0	0	0	0	0	0	0	164	0	0	0	0	0	0	0	0	0	0	0	0	0	0	0	1	0	0	0	0	0	0	0	0	0
Cluster-10.1036	1	0	0	0	0	0	0	0	0	0	12	0	0	0	0	0	61	6	14	0	0	0	0	0	0	0	0	0	0	0	0	38	0	0	3	0	0	0	0	63	0	0	0	6
Cluster-10.1037	0	0	2	0	1	0	0	0	0	0	4	0	0	0	0	0	0	0	0	0	0	0	0	0	0	0	3	1	850	0	0	0	0	0	0	0	0	0	0	0	0	0	0	0
Cluster-10.1038	0	0	0	0	0	0	0	0	0	0	213	0	0	0	0	0	0	0	328	0	0	0	0	0	0	0	4	5	0	0	7	0	0	0	0	0	0	0	0	0	25	0	0	0
Cluster-10.1039	2	1	33	1	1	0	0	0	2	0	8	0	0	1	143	0	0	32	3	0	0	0	0	0	6	2	1	0	1	9	0	0	2	0	0	0	0	0	2	0	0	0	0	1
Cluster-10.1040	0	0	0	0	0	21	0	0	0	0	0	0	25	0	0	0	0	0	28	0	17	0	0	16	120	0	0	0	1	1	0	0	0	37	77	0	73	0	9	0	161	4	0	0
Cluster-10.1041	0	0	0	0	2	0	0	0	0	0	2	0	4	0	0	0	0	0	0	0	0	0	0	0	0	0	0	0	0	0	0	0	0	0	0	0	7	0	0	0	0	0	0	0
Cluster-10.1042	0	0	0	2	0	0	0	0	0	0	3	0	0	0	0	0	0	0	0	0	0	62	0	0	0	0	0	0	0	0	0	1	0	0	0	0	0	0	0	0	0	0	0	0
Cluster-10.1043	1	3	142	0	0	0	0	0	0	0	0	0	247	59	190	0	0	0	0	0	0	0	132	0	0	33	0	0	16	20	0	0	0	2	0	0	43	0	9	0	0	2	0	0
Cluster-10.1044	0	0	4	0	0	0	0	0	0	0	212	0	0	0	1	0	0	1	0	0	0	0	0	0	0	0	5	176	0	5	1	0	0	0	0	0	3	0	1	0	0	0	0	0
Cluster-10.1045	0	2	0	0	0	0	0	0	0	0	0	0	4	0	0	0	0	0	0	0	1	0	0	11	0	3	0	0	54	0	0	0	0	83	0	0	13	0	109	13	48	20	0	0
Cluster-10.1046	0	0	0	0	0	0	0	0	0	0	36	0	17	119	0	0	0	0	1	0	57	0	0	76	0	0	0	0	0	6	0	1	0	162	61	0	60	106	9	0	0	3	84	0
Cluster-10.1047	6	0	6	3	4	5	7	5	3	0	58	0	11	4	3	1	0	5	25	0	15	0	5	13	81	8	16	44	17	133	7	24	2	25	0	0	64	3	32	70	13	7	0	0
Cluster-10.1048	11	4	38	0	12	7	5	2	0	0	14	0	341	19	190	2	6	51	176	0	8	0	14	7	2	22	74	129	6	8	330	22	40	94	22	6	71	2	122	6	0	2	0	54
Cluster-10.1049	0	0	0	2	0	0	4	0	1	0	1863	1	1	0	0	0	0	0	843	0	0	6	0	0	0	0	0	1	0	27	0	0	0	0	0	0	0	0	0	0	0	0	0	373
Cluster-10.1050	0	0	1	0	0	0	0	0	0	0	48	0	0	0	0	0	1	0	336	0	0	0	0	3	7	0	0	0	0	0	0	0	0	6	0	0	0	0	0	0	0	1	0	443
Cluster-10.1051	0	0	0	0	0	0	0	0	0	2	29	0	0	0	2	0	0	0	344	0	0	0	0	0	0	1	0	0	0	1	0	0	0	0	0	10	0	0	0	0	24	0	0	0
Cluster-10.1052	0	23	0	68	121	0	134	0	39	1	0	0	388	1	0	0	0	645	0	0	404	2	51	395	2	0	0	0	10	65	1	1	0	806	565	91	350	36	666	415	13	35	1	0
Cluster-10.1053	0	0	0	0	0	1	1	0	0	0	366	0	0	1	0	0	0	0	12	0	0	1	0	0	0	0	0	0	0	663	0	0	0	0	18	0	0	0	0	0	0	0	0	67
Cluster-10.1054	0	1	0	0	0	0	0	0	0	0	0	0	0	0	0	1	0	0	0	0	0	0	0	0	209	0	0	0	0	0	0	1	0	0	0	0	0	0	0	0	0	0	0	0
Cluster-10.1055	0	2	628	0	0	0	0	0	0	0	0	0	0	0	636	0	0	0	0	0	0	0	0	0	1	0	0	0	0	6	0	0	0	0	0	0	0	0	0	0	0	0	0	0
Cluster-10.1056	0	0	0	0	0	0	0	0	0	0	222	0	15	0	0	0	0	0	3	0	0	0	0	0	0	2	1268	3182	2	72	4458	2	0	0	1	14	5	4	1	1	9755	0	0	0
Cluster-10.1057	0	0	0	0	0	0	0	0	0	0	41	0	0	0	0	0	0	0	17	0	0	3	0	0	2	4	5	5	2	13107	2	53	0	0	1	1	3	1	0	0	2	0	0	19
Cluster-10.1058	0	1	0	38	0	0	352	0	0	0	1136	0	1	0	0	2	0	4	958	0	0	307	1	0	0	0	0	0	2	0	0	310	82	2	8	0	0	0	8	0	0	0	0	9
Cluster-10.1059	3	0	0	3	0	0	9	0	0	0	7684	0	0	0	0	255	1	1	4164	0	2	0	2	0	0	0	2	1	11	8	1	14766	8	1	3	0	1	8	2	1	1	0	0	4751
Cluster-10.1060	0	0	0	0	0	0	17	0	0	0	0	0	6	0	0	0	0	4	0	0	88	0	0	1	0	5	0	0	67	0	0	2	0	59	0	3	39	0	91	0	0	8	0	0
Cluster-10.1061	393	0	0	0	0	0	0	0	0	2	0	0	0	0	1	0	0	0	0	0	0	0	0	0	0	0	0	0	0	0	0	0	0	0	0	0	0	0	0	0	0	0	0	0
Cluster-10.1062	0	0	0	0	0	0	0	0	0	0	0	0	0	0	0	0	0	0	489	0	0	0	0	0	0	0	0	0	0	0	0	0	0	0	0	0	1	0	0	0	0	0	0	0
Cluster-10.1063	1	0	0	0	0	0	3	1	0	2	4	0	0	1	2	0	0	1	9	0	0	0	2	0	14	4	5	19	0	1	17	0	9	0	0	4	0	0	0	0	1	0	0	1
Cluster-10.1064	0	0	0	0	0	0	0	0	0	0	8	0	0	0	0	0	0	0	61	0	0	0	0	0	0	0	0	0	0	6	0	0	0	0	7	0	0	0	0	0	0	0	0	1
Cluster-10.1065	0	0	9	0	2	1	1	0	1	14	7	0	3	12	3	1	0	1	6	0	4	4	0	10	2	11	12	25	9	234	11	15	0	12	4	0	22	100	3	7	7	2	70	0
Cluster-10.1066	0	1	0	0	0	0	118	0	0	0	0	0	0	308	0	0	0	1	0	0	37	0	0	0	0	0	0	0	0	4	0	0	0	0	0	0	0	186	1	2	0	0	0	0
Cluster-10.1067	7	0	0	0	0	1	0	0	0	0	3	0	0	0	0	7	0	0	0	0	0	0	0	0	0	0	0	2	0	0	0	590	0	1	0	0	0	0	0	0	0	0	0	0
Cluster-10.1068	0	0	0	0	0	0	0	0	0	0	19	0	9	0	0	0	0	0	0	0	30	0	0	41	0	0	0	0	22	3	0	0	0	61	0	0	24	1114	3	0	1	0	536	0
Cluster-10.1069	0	0	0	0	1827	0	1	0	1	0	0	0	0	2	0	3	0	0	2	0	0	1	0	0	0	0	0	0	0	0	0	1	1	0	0	0	0	0	0	0	8	0	1	0
Cluster-10.1070	3	0	46	5	0	0	83	6	0	0	0	0	6	0	13	0	0	2	1	0	2	2	0	1	0	0	0	0	74	1262	0	0	3	38	0	0	26	0	96	21	0	8	0	0
Cluster-10.1071	0	1	21	2	0	0	0	6	0	0	0	0	0	0	15	0	0	0	0	0	2	0	0	1	0	0	0	0	5	1	0	0	0	6	599	1	2	23	8	15	0	0	0	0
Cluster-10.1072	0	0	117	6	30	2	98	6	30	381	211	0	1	4	10	26	2	69	11	0	12	17	54	5	37	52	89	400	2	1760	122	3	9	13	2	0	29	13	1	21	9	8	0	7
Cluster-10.1073	1	9	35	2	0	0	13	9	0	0	2	0	18	1	24	1	0	11	0	0	41	0	0	7	0	0	0	1	207	889	1	3	0	157	5	0	96	2	326	20	1	23	0	2
Cluster-10.1074	0	0	7	47	0	0	0	0	2	0	0	0	273	0	4	0	0	7	1	0	902	88	4	890	0	6	19	11	209	8	3	4	3	3294	3	0	2	3	1433	5	11	0	0	0
Cluster-10.1075	0	0	43	0	185	0	0	0	0	0	24	0	0	1	18	0	3	0	10	0	0	0	0	0	0	1	1	2	1	4001	0	0	0	0	1	9	0	0	0	0	101	0	21	6
Cluster-10.1076	1	4	1930	0	0	0	0	0	0	0	0	0	0	0	222	0	0	0	1	0	0	0	0	0	0	34	0	0	0	0	0	0	0	0	0	0	0	0	0	0	0	0	0	111
Cluster-10.1077	0	0	0	0	0	2	0	0	0	0	0	0	2	0	0	0	0	0	0	0	0	0	0	0	473	0	0	0	0	0	0	0	0	3	0	0	0	0	0	0	0	0	0	1
Cluster-10.1078	0	0	0	3	0	0	0	0	0	0	0	0	0	0	0	0	0	0	5	0	10	7	0	1	0	0	0	0	2	10170	0	1	0	26	0	1	1	1	13	250	2	1	0	0
Cluster-10.1079	0	0	0	0	0	0	0	0	0	34	0	0	0	0	0	0	0	0	0	0	0	0	0	0	0	0	0	0	0	0	0	0	0	0	0	0	0	0	0	0	0	0	0	0
Cluster-10.1080	0	0	0	3	0	0	42	0	0	0	353	0	1	0	0	7	6	3	562	0	0	8	0	0	0	2	0	0	0	1	1	277	3	0	36	0	0	0	0	0	0	0	0	0
Cluster-10.1081	0	0	0	2	2	0	0	0	0	0	0	0	0	0	0	0	0	0	0	0	0	90	0	0	0	0	0	0	2	2	0	0	0	0	0	0	0	0	0	0	0	0	0	0
Cluster-10.1082	0	0	6	0	45	0	0	0	0	0	0	0	0	3	0	0	1	0	0	0	0	0	0	3	0	0	0	0	32	2	0	0	0	3	0	0	4	0	4	0	0	0	0	0
Cluster-10.1083	0	4	1529	0	0	0	0	0	1266	0	0	0	0	1	521	0	0	0	0	0	0	0	0	0	0	11	3	5	2	44616	1	3	1	4	4	4	1	3	2	5	4	0	0	0
Cluster-10.1084	0	0	1	43	15	0	0	0	0	2	0	0	1	0	37	0	0	611	0	0	0	20	99	0	0	2	853	1085	0	4	2	0	0	0	19	0	0	254	0	0	846	2	0	0
Cluster-10.1085	0	1	3088	0	0	0	6	0	0	1	0	0	0	0	463	0	0	0	0	0	0	0	0	0	30	4	3	26	7	68	19	2	0	2	0	0	0	0	2	0	0	10	0	175
Cluster-10.1086	280	46	5961	204	1145	507	541	1188	2656	695	954	1	438	865	838	465	612	723	662	1	761	603	354	1625	312	966	2922	1641	363	72066	1294	2567	65	1501	1132	105	1098	1242	460	876	196	736	247	324
Cluster-10.1087	0	0	0	2	1	0	0	0	0	0	101	0	0	0	0	10	0	0	561	0	0	0	0	0	0	0	1	4	0	17	1	547	0	3	0	0	0	0	0	0	0	0	0	0
Cluster-10.1088	0	0	0	0	213	0	0	0	0	0	0	0	0	0	0	0	0	0	2	0	0	0	0	0	0	0	0	0	5	9	0	30	0	0	0	0	0	0	0	0	0	0	0	0
Cluster-10.1089	0	0	0	0	0	0	96	0	0	0	0	0	0	0	0	0	0	0	1	0	0	0	0	0	0	0	0	0	0	1	1	0	2	0	7	0	0	0	0	0	0	0	0	0
Cluster-10.1090	0	0	0	0	0	0	467	1	0	0	1	0	0	4	0	0	0	0	10	0	0	0	0	0	3107	1	190	4130	3	23	690	10	0	0	1	4	0	0	1	0	0	18	0	0
Cluster-10.1091	0	1	0	1	0	0	133	4	0	56	427	0	0	0	0	0	0	0	0	0	2	1	0	0	0	1	1	0	0	1	0	0	0	2	35	0	2	0	0	0	0	0	0	626
Cluster-10.1092	0	0	0	0	2	0	0	0	0	0	0	0	0	0	0	1	0	0	0	0	0	0	0	0	0	0	0	0	0	9	0	19	0	0	0	0	0	0	0	0	0	0	0	0
Cluster-10.1093	0	2	0	0	1	1	2	0	2	3	4	1	2	0	3	0	0	0	3	0	4	1	2	8	0	0	1	1	0	17	0	2	0	5	2	2	1	13	2	2	1	1	19	0
Cluster-10.1094	2	0	29	0	0	0	0	0	16	1	0	0	1	30	3	0	5	0	0	0	15	0	0	44	0	0	0	2	5	0	0	0	0	34	0	0	10	0	24	2	3	0	0	0
Cluster-10.1095	0	0	2	0	0	0	0	0	3	0	0	0	3	3	0	0	0	0	0	0	1	0	1	12	0	0	0	0	5	0	0	0	0	16	0	0	34	0	18	1	0	2	0	0
Cluster-10.1096	0	1	17	0	187	442	0	0	34	1	1	0	255	15	15	2	0	0	2	0	0	0	28	1	4	58	0	3	5	0	0	14	0	1	153	0	214	0	1	602	2	6	0	2
Cluster-10.1097	0	0	30	0	4	1	2	9	1	67	3	0	1	8	0	7	1	7	0	0	8	0	0	1	22	0	8	32	12	23	1	23	0	9	0	0	24	0	9	21	15	2	1	0
Cluster-10.1098	0	1	0	0	0	0	0	0	0	0	0	0	90	0	0	0	2	1088	2	0	2	0	0	504	465	0	9	29	126	0	52	1	0	428	0	0	121	1	66	2	1	44	0	0
Cluster-10.1099	13	0	7	2	13	1	3	0	1	0	6	0	0	1	82	0	0	75	4	0	7	0	1	0	0	2	0	3	0	2	1	0	1	0	0	0	0	0	0	0	0	0	0	0
Cluster-10.1100	0	0	50	0	0	0	0	6	10	0	0	0	0	0	21	5	0	0	0	0	0	0	0	0	0	0	0	1	0	0	4	24	0	0	0	0	0	0	0	0	0	0	0	0
Cluster-10.1101	0	0	0	0	0	0	0	0	0	8	0	0	0	0	0	0	0	0	0	0	0	0	0	0	0	0	0	0	0	0	0	1	0	0	0	0	0	0	0	0	0	0	0	0
Cluster-10.1102	0	2	1	0	0	0	0	0	0	0	0	0	0	0	1	2	0	0	0	0	0	0	4	0	0	0	0	0	0	0	0	23	0	0	0	9	0	0	0	0	0	0	0	0
Cluster-10.1103	0	0	0	3	0	0	0	0	0	0	0	0	0	0	0	0	0	0	0	0	0	7	1	9	0	2	113	123	1	1	54	0	0	69	6	680	1	0	77	1	0	7	0	0
Cluster-10.1104	1	0	0	0	0	3	0	0	0	0	0	0	8	1	0	0	0	0	4	0	3	0	0	0	11	0	0	0	3	0	0	0	0	8	16	0	23	0	0	0	31	0	0	0
Cluster-10.1105	0	0	0	8	0	0	0	0	0	0	454	0	0	0	0	0	0	0	78	0	0	3	0	0	0	0	0	0	0	38	0	0	0	0	0	0	0	0	0	0	0	0	0	16
Cluster-10.1106	0	0	36	0	0	0	0	0	1	0	0	0	0	0	17	4	0	0	0	0	0	0	0	0	0	0	0	1	0	0	2	22	0	0	0	0	0	0	0	0	0	0	0	0
Cluster-10.1107	0	0	1	0	0	0	24	265	0	0	0	0	0	0	0	0	0	0	0	0	0	0	1	0	0	0	0	0	0	0	0	0	0	0	1	0	0	0	0	0	0	26	0	0
Cluster-10.1108	0	0	0	0	0	0	1	0	0	0	0	0	26	10	0	26	0	0	0	0	296	0	15	386	778	4	0	0	1803	2	0	330	0	339	27	0	293	0	149	0	38	262	0	0
Cluster-10.1109	2	0	19	0	2	4	3	0	2	0	8	0	15	0	6	0	0	3	13	0	1	0	0	3	47	1	5	19	2	304	16	4	0	12	0	4	13	0	10	7	2	1	0	0
Cluster-10.1110	1	0	0	1	0	0	0	0	0	0	270	0	0	1	1	4	1	0	0	0	0	0	0	0	18	0	0	0	0	0	0	0	2	0	11	0	0	4	0	0	0	1	1	28
Cluster-10.1111	2	0	1	0	0	9	6	1	0	0	0	0	1	6	0	0	2	6	2	0	0	3	3	0	0	0	1	0	5	44	1	5	0	0	6	50	0	1	4	1	146	1	1	0
Cluster-10.1112	0	0	3	0	0	0	0	34	1	0	0	0	0	0	3	0	0	0	0	0	0	0	0	0	0	0	4	0	0	0	1	2	0	0	0	0	0	0	0	0	0	0	0	0
Cluster-10.1113	0	1	0	5	0	0	0	0	0	0	0	0	0	0	0	0	0	0	0	0	0	82	0	0	0	0	1	41	0	0	101	0	0	0	0	0	0	0	0	0	0	0	0	0
Cluster-10.1114	5	10	21	62	24	310	14	23	5	32	26	0	1	221	128	1	153	99	196	0	2	10	775	0	118	425	12	61	18	31	99	8	47	1	17	4	0	3	4	1	22	1	0	18
Cluster-10.1115	0	1	1	473	0	0	0	0	0	0	0	0	26	0	0	0	0	0	0	0	75	667	0	73	0	0	0	0	0	0	0	0	1	252	1	0	0	0	108	0	0	0	0	0
Cluster-10.1116	0	0	0	0	349	1	0	0	0	0	0	0	18	0	0	0	15	0	0	0	4	0	0	12	6	0	0	0	67	0	0	4	0	3	1	0	21	0	5	0	0	15	0	0
Cluster-10.1117	10152	89	910	7480	18818	5845	3870	3680	1138	9060	13368	11	932	14025	5697	30613	8879	561	1296	2	1969	13776	3990	461	9036	77	67	141	55	4894	190	1589	18814	4982	123	140	662	80	378	97	30	9844	28815	4027
Cluster-10.1118	166	7	121	137	330	82	47	80	19	109	281	0	89	137	146	301	73	2	7	0	109	223	118	64	1950	21	2	31	0	4813	99	16	260	457	13	3	16	1	481	1	149	193	351	57
Cluster-10.1119	0	0	0	0	0	1919	0	0	0	0	0	0	0	40	0	0	0	0	0	0	0	0	3	0	0	0	3	12	0	0	1	0	0	0	367	0	0	29	0	0	0	5	0	0
Cluster-10.1120	3	0	19	0	16	0	0	98	4	0	67	0	71	3	15	32	28	1	0	0	6	0	2	8	100	0	5	11	13	17	2	299	0	15	424	0	8	3	19	26	0	2	0	18
Cluster-10.1121	12	2	34	1	12	19	9	3	0	0	6	0	360	19	213	6	7	56	185	0	15	0	18	8	0	28	120	100	5	10	365	35	59	109	16	4	54	5	125	6	0	4	2	70
Cluster-10.1122	0	0	0	0	0	20	0	0	0	0	0	0	1	0	0	0	3	0	0	0	0	0	0	0	0	0	0	0	0	0	0	0	0	0	0	0	10	0	0	0	0	1	0	0
Cluster-10.1123	0	0	1	0	0	0	0	0	0	0	1	0	0	0	1	0	0	0	0	0	0	0	0	0	0	7	5	66	0	0	79	1	0	0	0	0	0	0	0	0	0	22	0	0
Cluster-10.1124	0	0	0	21	0	0	0	0	0	0	0	0	0	15	0	0	0	0	0	0	0	10	0	0	0	0	0	0	0	1067	0	0	0	0	0	0	0	0	0	0	1	0	0	0
Cluster-10.1125	0	0	0	2	0	0	1	0	0	69	0	0	0	0	6	0	0	0	55	0	0	3	0	0	4	0	2	10	0	0	12	0	2	0	0	0	0	0	0	0	0	0	0	4
Cluster-10.1126	0	1	0	4	0	0	0	0	0	0	0	0	0	0	0	0	0	0	0	0	0	0	50	0	5	0	0	0	0	0	0	0	0	0	0	0	0	0	0	29	0	3	0	0
Cluster-10.1127	14	0	105	18	131	8	7	3	33	9	6	1	0	16	787	0	3	1209	67	0	9	0	17	0	52	26	6	19	1	60	16	2	19	1	23	3	0	2	2	1	21	0	1	16
Cluster-10.1128	0	0	0	0	0	0	1	112	1	0	1	0	0	0	0	0	0	0	0	0	0	0	0	0	1	3	4	4	1	52	6	0	0	0	0	0	2	7	0	3	2	0	0	0
Cluster-10.1129	97	4	127	27	212	334	213	130	57	44	357	0	65	175	57	46	38	206	46	0	66	244	93	53	120	10	66	135	72	1712	60	239	2	131	188	25	95	26	139	47	18	69	21	97
Cluster-10.1130	63	16	85	125	154	137	79	107	101	109	244	1	392	198	249	22	91	192	723	0	115	225	162	128	84	607	730	511	98	2590	381	300	141	275	297	46	188	118	377	129	71	86	52	113
Cluster-10.1131	1732	5	45	1118	2193	639	512	561	121	873	2054	8	109	1458	713	2790	773	40	664	1	5033	2407	539	60	1222	2	9	20	4	227	41	95	1608	452	5	11	44	1	28	4	38	1381	3210	617
Cluster-10.1132	0	0	3	0	1	73	0	3	0	0	1	0	0	0	1	0	147	815	1	0	0	0	0	0	0	2	2	2	1	0	4	2	0	0	1	0	0	1	0	2	0	13	0	0
Cluster-10.1133	0	0	0	17	1	0	113	0	0	0	0	0	0	0	0	0	14	49	0	0	0	26	0	0	0	0	7	54	0	0	20	1	7	0	275	0	0	0	0	0	18	0	0	0
Cluster-10.1134	0	0	0	0	0	0	0	0	0	1	0	0	0	0	0	0	0	0	0	0	0	0	0	0	0	6	350	349	0	2	0	0	0	0	22	0	0	104	1	0	339	0	0	0
Cluster-10.1135	3	0	149	4	7	40	39	22	26	4	89	0	46	35	109	6	8	60	182	0	57	28	0	38	389	44	53	634	35	5945	152	91	11	143	4	26	424	5	60	32	150	30	0	2
Cluster-10.1136	0	0	0	0	0	0	0	0	0	1	0	0	83	1	0	0	0	1022	0	0	0	0	47	405	463	1	0	2	14	1	0	0	0	358	4	0	172	0	59	0	3	43	1	0
Cluster-10.1137	0	32	0	0	0	0	0	0	0	0	0	0	0	0	0	0	0	37	0	0	0	0	0	0	0	0	0	0	0	0	0	0	0	0	0	0	0	0	0	1	0	0	0	0
Cluster-10.1138	0	7	0	0	0	0	0	0	0	0	0	0	0	0	0	1	0	0	0	0	0	2	12	0	0	0	0	0	0	0	0	29	0	0	0	2	0	0	0	0	0	0	0	0
Cluster-10.1139	0	0	0	2	0	0	5	0	0	4	24	0	0	0	0	0	0	0	103	0	0	12	0	0	0	0	0	0	0	98	0	4	1	0	0	0	0	0	0	0	0	0	0	148
Cluster-10.1140	0	0	0	0	0	0	0	0	0	10	0	0	0	0	0	0	0	0	0	0	0	0	0	0	0	0	0	0	0	0	0	0	0	0	0	0	0	0	0	0	0	0	0	0
Cluster-10.1141	0	0	16	0	0	0	2	66	0	0	1	0	3	0	2	0	0	0	0	0	1	0	0	2	0	0	0	3	0	36	0	2	0	1	1	0	5	0	0	0	1	0	0	0
Cluster-10.1142	0	0	0	0	0	0	0	0	0	0	21	0	14	0	0	0	0	0	0	0	31	0	17	39	0	0	0	0	18	1	0	0	0	32	0	0	63	0	19	3	0	4	0	3
[truncated: 401 more rows]

## Sheet: fig5a_readcount_data
SFC.023	SFC13	SFC14	SFC15.CM	SFC16	SFC17	SFC.18	SFC19	SFC.21	SFC22	SFM.10	SFM.1	SFM.3	SFM.5	SFM.6	SFM.7	SFM.8	SFU2	SFU.3	SXC2	IFC63	IFC66	IFD6	IFD8	IFM047	IFM.049	IFM050	IFM054	IFM058	IFM060	IFM061	IFM12	IFM14	IFM21	IFM23	IFM24	IFM26	IFM27	IFM53	IFM56	IFM57
[truncated: 5 more rows]

[truncated: 1 more sheets: rpkm_seperate_assembly_clustere]
